# Supplementary material
Source: publisher figshare collection journal article supplement (https://gsajournals.figshare.com/ndownloader/files/13529339)
Supplement: Supplementary file 1 [file 13529339]

locus_name	chr	CM	Arsenio_002	Arsenio_005	Arsenio_007	Arsenio_010	Arsenio_011	Arsenio_012	Arsenio_016	Arsenio_017	Arsenio_020	Arsenio_021	Arsenio_025	Arsenio_026	Arsenio_027	Arsenio_029	Arsenio_030	Arsenio_031	Arsenio_032	Arsenio_033	Arsenio_035	Arsenio_036	Arsenio_039	Arsenio_040	Arsenio_041	Arsenio_042	Arsenio_044	Arsenio_045	Arsenio_046	Arsenio_047	Arsenio_049	Arsenio_050	Arsenio_051	Arsenio_052	Arsenio_053	Arsenio_054	Arsenio_055	Arsenio_057	Arsenio_058	Arsenio_059	Arsenio_060	Arsenio_061	Arsenio_062	Arsenio_063	Arsenio_064	Arsenio_065	Arsenio_066	Arsenio_067	Arsenio_068
2_06691	1	0	H	B	B	A	B	-	H	H	H	A	A	H	H	H	H	H	H	-	H	H	H	H	-	H	H	H	A	B	-	B	H	B	H	B	A	-	H	-	H	H	H	B	B	H	A	B	H
2_01267	1	3.282	H	B	-	A	H	H	H	H	H	A	A	H	H	H	H	H	H	B	H	H	H	H	H	H	H	H	A	B	B	B	H	B	H	B	A	B	H	B	H	H	H	B	B	H	A	B	H
2_46701	1	4.627	H	B	-	A	H	H	H	H	H	A	A	H	H	H	H	H	H	B	H	H	H	H	H	H	H	H	A	B	B	B	H	B	H	B	A	B	B	B	H	H	H	B	B	H	A	B	H
2_11379	1	5.131	H	-	B	A	-	-	H	-	-	A	A	H	H	H	H	H	H	-	H	H	H	H	H	H	H	H	A	B	B	B	H	B	H	B	A	-	B	-	H	H	H	B	B	H	A	B	H
2_38586	1	5.131	H	-	-	A	H	H	H	H	H	A	A	H	H	H	H	H	H	B	H	H	H	H	H	H	H	H	A	B	B	B	H	B	H	B	A	B	B	B	H	H	H	B	B	H	A	B	H
2_43999	1	7.739	H	B	-	A	H	B	H	H	H	A	A	H	H	H	H	H	H	B	H	H	H	H	H	H	A	H	A	B	B	B	H	B	H	B	A	B	B	B	H	H	H	B	B	H	A	B	H
2_06024	1	8.579	H	B	B	A	H	B	H	H	A	A	A	H	H	H	H	H	H	B	H	H	H	H	H	H	A	H	A	B	B	B	H	B	H	B	A	B	B	B	H	H	H	B	B	H	A	B	H
2_08584	1	8.999	H	B	B	A	H	B	H	H	A	A	A	H	H	H	H	H	H	B	H	H	H	H	H	H	A	H	A	B	B	B	H	B	H	B	A	B	B	B	H	H	H	B	B	H	H	B	H
2_23136	1	8.999	H	B	B	A	H	B	H	H	A	A	A	H	H	H	H	H	H	B	H	H	H	H	H	H	A	H	A	B	B	B	H	B	H	B	A	B	B	B	H	H	H	B	B	H	H	B	H
2_34360	1	8.999	H	B	B	A	H	B	H	H	A	A	A	H	H	H	H	H	H	B	H	H	H	H	H	H	A	H	A	B	B	B	H	B	H	B	A	B	B	B	H	H	H	B	B	H	H	B	H
2_39077	1	8.999	H	B	B	A	H	B	H	H	A	A	A	H	H	H	H	H	H	B	H	H	H	H	H	H	A	H	A	B	B	B	H	B	H	B	A	B	B	B	H	H	H	B	B	H	H	B	H
2_40227	1	8.999	H	B	B	A	H	B	H	H	A	A	A	H	H	H	H	H	H	B	H	H	H	H	H	H	A	H	A	B	B	B	H	B	H	B	A	B	B	B	H	H	H	B	B	H	H	B	H
2_40354	1	8.999	H	B	B	A	H	B	H	H	A	A	A	H	H	H	H	H	H	B	H	H	H	H	H	H	A	H	A	B	B	B	H	B	H	B	A	B	B	B	H	H	H	B	B	H	H	B	H
2_44400	1	8.999	H	B	B	A	H	B	H	H	A	A	A	H	H	H	H	H	H	B	H	H	H	H	H	H	A	H	A	B	B	B	H	B	H	B	A	B	B	B	H	H	H	B	B	H	H	B	H
2_44813	1	8.999	H	B	B	A	H	B	H	H	A	A	A	H	H	H	H	H	H	B	H	H	H	H	H	H	A	H	A	B	B	B	H	B	H	B	A	B	B	B	H	H	H	B	B	H	H	B	H
2_45042	1	8.999	H	B	B	A	H	B	H	H	A	A	A	H	H	H	H	H	H	B	H	H	H	H	H	H	A	H	A	B	B	B	H	B	H	B	A	B	B	B	H	H	H	B	B	H	H	B	H
2_52504	1	8.999	H	B	B	A	H	B	H	H	A	A	A	H	H	H	H	H	H	B	H	H	H	H	H	H	A	H	A	B	B	B	H	B	H	B	A	B	B	B	H	H	H	B	B	H	H	B	H
2_03707	1	10.68	H	B	B	A	H	B	H	H	A	A	H	H	H	H	H	H	H	B	H	H	H	H	H	B	A	H	A	B	B	B	H	B	H	B	A	B	B	B	H	H	H	B	B	A	H	B	H
2_51977	1	11.101	H	H	B	A	H	B	H	H	A	A	H	H	H	H	H	H	H	B	H	H	H	H	H	B	A	H	A	B	B	B	H	B	H	B	A	B	B	B	H	H	H	B	B	A	H	B	H
2_43074	1	12.361	H	H	B	A	H	B	H	H	A	A	H	H	H	H	H	H	H	B	H	H	H	H	H	B	A	H	A	B	B	B	H	B	H	B	A	B	B	B	H	H	H	B	B	A	H	B	H
2_45131	1	12.361	H	H	B	A	H	B	H	H	A	A	H	H	H	H	H	H	H	B	H	H	H	H	H	B	A	H	A	B	B	B	H	B	H	B	A	B	B	B	H	H	H	B	B	A	H	B	H
2_52871	1	12.361	H	H	B	A	H	B	H	H	A	A	H	H	H	H	H	H	H	B	H	H	H	H	H	B	A	H	A	B	B	B	H	B	H	B	A	B	B	B	H	H	H	B	B	A	H	B	H
2_32454	1	12.782	H	H	B	A	H	B	H	H	A	A	H	H	H	H	H	H	H	B	H	H	H	H	H	B	A	H	A	B	B	B	H	B	H	B	A	B	B	B	H	H	H	B	B	A	H	B	H
2_47092	1	12.782	H	H	B	A	H	B	H	H	A	A	H	H	H	H	H	H	H	B	H	H	H	H	H	B	A	H	A	B	B	B	H	B	H	B	A	B	B	B	H	H	H	B	B	A	H	B	H
2_41996	1	13.202	H	H	B	A	H	B	H	H	A	A	H	H	H	H	H	H	H	B	H	H	H	H	H	B	A	H	A	B	B	H	H	B	H	B	A	B	B	B	H	H	H	B	B	A	H	B	H
2_37941	1	14.042	H	H	B	A	H	B	H	H	A	A	H	H	H	H	H	B	H	B	H	A	H	H	H	B	A	H	A	B	B	H	H	B	H	B	A	B	B	B	H	H	H	B	B	A	H	B	H
2_43223	1	14.042	H	H	B	A	H	B	H	H	A	A	H	H	H	H	H	B	H	B	H	A	H	H	H	B	A	H	A	B	B	H	H	B	H	B	A	B	B	B	H	H	H	B	B	A	H	B	H
2_44130	1	14.042	H	H	B	A	H	B	H	H	A	A	H	H	H	H	H	B	H	B	H	A	H	H	H	B	A	H	A	B	B	H	H	B	H	B	A	B	B	B	H	H	H	B	B	A	H	B	H
2_47064	1	14.042	H	H	B	A	H	B	H	H	A	A	H	H	H	H	H	B	H	B	H	A	H	H	H	B	A	H	A	B	B	H	H	B	H	B	A	B	B	B	H	H	H	B	B	A	H	B	H
2_38609	1	14.462	H	H	B	A	H	B	H	H	A	A	H	H	H	H	H	B	H	B	B	A	H	H	H	B	A	H	A	B	B	H	H	B	H	B	A	B	B	B	H	H	H	B	B	A	H	B	H
2_39628	1	14.462	H	H	B	A	H	B	H	H	A	-	H	H	H	H	H	B	H	B	B	A	H	H	H	B	A	H	A	B	B	H	H	B	H	B	A	B	B	B	H	H	H	B	B	A	H	B	H
2_43251	1	14.462	H	H	B	A	H	B	H	H	A	A	H	H	H	H	H	B	H	B	B	A	H	H	H	B	A	H	A	B	B	H	H	B	H	B	A	B	B	B	H	H	H	B	B	A	H	B	H
2_45461	1	14.462	H	H	B	A	H	B	H	H	A	A	H	H	H	H	H	B	H	B	B	A	H	H	H	B	A	H	A	B	B	H	H	B	H	B	A	B	B	B	H	H	H	B	B	A	H	B	H
2_47294	1	14.462	-	H	B	A	H	B	H	H	A	A	H	H	H	H	H	B	H	B	B	A	H	H	-	B	A	H	A	B	B	H	H	B	H	B	A	B	B	B	H	H	H	B	B	A	H	B	H
2_49794	1	14.462	H	H	B	A	H	B	H	H	A	A	H	H	H	H	H	B	H	B	B	A	H	H	H	B	A	H	A	B	B	H	H	B	H	B	A	B	B	B	H	H	H	B	B	A	H	B	H
2_51662	1	14.462	H	H	B	A	H	B	H	H	A	A	H	H	H	H	H	B	H	B	B	A	H	H	H	B	A	H	A	B	B	H	H	B	H	B	A	B	B	B	H	H	H	B	B	A	H	B	H
2_52488	1	14.462	H	H	B	A	-	B	H	H	A	A	H	H	H	H	H	B	H	B	B	A	H	H	H	B	A	H	A	B	B	H	H	B	H	B	A	B	B	B	H	H	H	B	B	A	H	B	H
2_45053	1	15.303	H	H	B	A	H	B	H	H	A	A	H	H	H	H	H	B	H	H	B	A	H	H	H	B	A	H	A	B	B	H	H	B	H	B	A	B	B	B	H	H	H	B	B	A	H	B	H
2_53036	1	15.303	H	H	B	A	H	B	H	H	A	A	H	H	H	H	H	B	H	H	B	A	H	H	H	B	A	H	A	B	B	H	H	B	H	B	A	B	B	B	H	H	H	B	B	A	H	B	H
2_07207	1	16.563	H	H	B	A	H	B	H	H	A	A	H	H	H	H	A	B	H	H	B	A	H	H	H	B	A	H	A	B	B	H	H	B	H	B	A	B	B	B	H	H	H	B	B	A	H	B	H
2_27379	1	16.563	H	H	B	A	H	B	H	H	A	A	H	H	H	H	A	B	H	H	B	A	H	H	H	B	A	H	A	B	B	H	H	B	H	B	A	B	B	B	H	H	H	B	B	A	H	B	H
2_52484	1	16.563	H	H	B	A	H	B	H	H	A	A	H	H	H	H	A	B	H	H	B	A	H	H	H	B	A	H	A	B	B	H	H	B	H	B	A	B	B	B	H	H	H	B	B	A	H	B	H
2_02603	1	16.984	H	H	B	A	H	B	H	A	A	A	H	H	H	H	A	B	H	H	B	A	H	H	H	B	A	H	A	B	B	H	H	B	H	B	A	B	B	B	H	H	H	B	B	A	H	B	H
2_11496	1	16.984	H	H	B	A	H	B	H	A	A	A	H	H	H	H	A	B	H	H	B	A	H	H	H	B	A	H	A	B	B	H	H	B	H	B	A	B	B	B	H	H	H	B	B	A	H	B	H
2_11497	1	16.984	H	H	B	A	H	B	H	A	A	A	H	H	H	H	A	B	H	H	B	A	H	H	H	B	A	H	A	B	B	H	H	B	H	B	A	B	B	B	H	H	H	B	B	A	H	B	H
2_15810	1	16.984	H	H	B	A	H	B	H	A	A	A	H	H	H	H	A	B	H	H	B	A	H	H	H	B	A	H	A	B	B	H	H	B	H	B	A	B	B	B	H	H	H	B	B	A	H	B	H
2_43888	1	16.984	H	H	B	A	H	B	H	A	A	A	H	H	H	H	A	B	H	H	B	A	H	H	H	B	A	H	A	B	B	H	H	B	H	B	A	B	B	B	H	H	H	B	B	A	H	B	H
2_49534	1	16.984	H	H	B	A	H	B	H	A	A	A	H	H	H	H	A	B	H	H	B	A	H	H	H	B	A	H	A	B	B	H	H	B	H	B	A	B	B	B	H	H	H	B	B	A	H	B	H
2_50678	1	16.984	H	H	B	A	H	B	H	A	A	A	H	H	H	H	A	B	H	H	B	A	H	H	H	B	A	H	A	B	B	H	H	B	H	B	A	B	B	B	H	H	H	B	B	A	H	B	H
2_53486	1	16.984	H	H	B	A	H	B	H	A	A	A	H	H	H	H	A	B	H	H	B	A	H	H	H	B	A	H	A	B	B	H	H	B	H	B	A	B	B	B	H	H	H	B	B	A	H	B	H
2_08621	1	17.404	H	H	B	A	H	B	H	A	A	A	H	H	H	H	A	B	H	H	B	A	H	H	H	B	A	H	A	B	B	H	H	B	H	B	A	B	B	B	H	H	H	B	B	A	H	B	A
2_08622	1	17.404	H	H	B	A	H	B	H	A	A	A	H	H	H	H	A	B	H	H	B	A	H	H	H	B	A	H	A	B	B	H	H	B	H	B	A	B	B	B	H	H	H	B	B	A	H	B	A
2_11076	1	17.404	H	H	B	A	H	B	H	A	A	A	H	H	H	H	A	B	H	H	B	A	H	H	H	B	A	H	A	B	B	H	H	B	H	B	A	B	B	B	H	H	H	B	B	A	H	B	A
2_18321	1	17.404	H	H	B	A	H	B	H	A	A	A	H	H	H	H	A	B	H	H	B	A	H	H	H	B	A	H	A	B	B	H	H	B	H	B	A	B	B	B	H	H	H	B	B	A	H	B	A
2_31464	1	17.404	H	H	B	A	H	B	H	A	A	A	H	H	H	H	A	B	H	H	B	A	H	H	H	B	A	H	A	B	B	H	H	B	H	B	A	B	B	B	H	H	H	B	B	A	H	B	A
2_31751	1	17.404	H	H	B	A	H	B	H	A	A	A	H	H	H	H	A	B	H	H	B	A	H	H	H	B	A	H	A	B	B	H	H	B	H	B	A	B	B	B	H	H	H	B	B	A	H	B	A
2_34654	1	17.404	H	H	B	A	H	B	H	A	A	A	H	H	H	H	A	B	H	H	B	A	H	H	H	B	A	H	A	B	B	H	H	B	H	B	A	B	B	B	H	H	H	B	B	A	H	B	A
2_39779	1	17.404	H	H	B	A	-	-	H	A	A	A	H	H	H	H	A	B	H	H	B	A	H	H	H	B	A	H	A	B	B	H	H	B	H	B	A	B	B	B	H	H	H	B	B	A	H	B	A
2_40175	1	17.404	H	H	B	A	H	B	H	A	A	A	H	H	H	H	A	B	H	H	B	A	H	H	H	B	A	H	A	B	B	H	H	B	H	B	A	B	B	B	H	H	H	B	B	A	H	B	A
2_40448	1	17.404	H	H	B	A	H	B	H	A	A	A	H	H	H	H	A	B	H	H	B	A	H	H	H	B	A	H	A	B	B	H	H	B	H	B	A	B	B	B	H	H	H	B	B	A	H	B	A
2_41311	1	17.404	H	H	B	A	H	B	H	A	A	A	H	H	H	H	A	B	H	H	B	A	H	H	H	B	A	H	A	B	B	H	H	B	H	B	A	B	B	B	H	H	H	B	B	A	H	B	A
2_42303	1	17.404	H	H	B	A	H	B	H	A	A	A	H	H	H	H	A	B	H	H	B	A	H	H	H	B	A	H	A	B	B	H	H	B	H	B	A	B	B	B	H	H	H	B	B	A	H	B	A
2_44681	1	17.404	H	H	B	A	H	B	H	A	A	A	H	H	H	H	A	B	H	H	B	A	H	H	H	B	A	H	A	B	B	H	H	B	H	B	A	B	B	B	H	H	H	B	B	A	H	B	A
2_50400	1	17.404	H	H	B	A	H	B	H	A	A	A	H	H	H	H	A	B	H	H	B	A	H	H	H	B	A	H	A	B	B	H	H	B	H	B	A	B	B	B	H	H	H	B	B	A	H	B	A
2_50634	1	17.404	H	H	B	A	H	B	H	A	A	A	H	H	H	H	A	B	H	H	B	A	H	H	H	B	A	H	A	B	B	H	H	B	H	B	A	B	B	B	H	H	H	B	B	A	H	B	A
2_51025	1	17.404	H	H	B	A	H	B	H	A	A	A	H	H	H	H	A	B	H	H	B	A	H	H	H	B	A	H	A	B	B	H	H	B	H	B	A	B	B	B	H	H	H	B	B	A	H	B	A
2_52398	1	17.404	H	H	B	A	H	B	H	A	A	A	H	H	H	H	A	B	H	H	B	A	H	H	H	B	A	H	A	B	B	H	H	B	H	B	A	B	B	B	H	H	H	B	B	A	H	B	A
2_52953	1	17.404	H	H	B	A	H	B	H	A	A	A	H	H	H	H	A	B	H	H	B	A	H	H	H	B	A	H	A	B	B	H	H	B	H	B	A	B	B	B	H	H	H	B	B	A	H	B	A
2_54338	1	17.404	H	H	B	A	H	B	H	A	A	A	H	H	H	H	A	B	H	H	B	A	H	H	H	B	A	H	A	B	B	H	H	B	H	B	A	B	B	B	H	H	H	B	B	A	H	B	A
2_49393	1	17.824	H	H	B	H	H	B	H	A	A	A	H	H	H	H	A	B	H	H	B	A	H	H	H	B	A	H	A	B	B	H	H	B	H	B	A	B	B	B	H	H	H	B	B	A	H	B	A
2_15510	1	18.244	H	H	B	H	H	B	H	A	A	A	H	H	H	H	A	B	H	H	B	A	H	H	H	B	A	H	A	B	B	H	H	B	H	B	A	B	B	B	H	H	H	B	B	A	H	B	A
2_15511	1	18.244	H	H	B	H	H	B	H	A	A	A	H	H	H	H	A	B	H	H	B	A	H	H	H	B	A	H	A	B	B	H	H	B	H	B	A	B	B	B	H	H	H	B	B	A	H	B	A
2_43347	1	18.244	H	H	B	H	H	B	H	A	A	A	H	H	H	H	A	B	H	H	B	A	H	H	H	B	A	H	A	B	B	H	H	B	H	B	A	B	B	B	H	H	H	B	B	A	H	B	A
2_43857	1	18.244	H	H	B	H	H	B	H	A	A	A	H	H	H	H	A	B	H	H	B	A	H	H	H	B	A	H	A	B	B	H	H	B	H	B	A	B	B	B	H	H	H	B	B	A	H	B	A
2_54754	1	18.244	H	H	B	H	H	B	H	A	A	A	H	H	H	H	A	B	H	H	B	A	H	H	H	B	A	H	A	B	B	H	H	B	H	B	A	B	B	B	H	H	H	B	B	A	H	B	A
1_1360	1	19.505	H	H	B	H	H	B	H	A	A	A	H	H	H	H	A	B	H	H	B	A	H	H	H	B	A	H	A	B	B	H	H	B	H	B	A	B	B	B	H	H	H	B	B	A	H	B	A
2_04243	1	19.505	H	H	B	H	H	B	H	A	A	A	H	H	H	H	A	B	H	H	B	A	H	H	H	B	A	H	A	B	B	H	H	B	H	B	A	B	B	B	H	H	H	B	B	A	H	B	A
2_04244	1	19.505	H	H	B	H	H	B	H	A	A	A	H	H	H	H	A	B	H	H	B	A	H	H	H	B	A	H	A	B	B	H	H	B	H	B	A	B	B	B	H	H	H	B	B	A	H	B	A
2_06780	1	19.505	H	H	B	H	H	B	H	A	A	A	H	H	H	H	A	B	H	H	B	A	H	H	H	B	A	H	A	B	B	H	H	B	H	B	A	B	B	B	H	H	H	B	B	A	H	B	A
2_06781	1	19.505	H	H	B	H	H	B	H	A	A	A	H	H	H	H	A	B	H	H	B	A	H	H	H	B	A	H	A	B	B	H	H	B	H	B	A	B	B	B	H	H	H	B	B	A	H	B	A
2_07049	1	19.505	H	H	B	H	H	B	H	A	A	A	H	H	H	H	A	B	H	H	B	A	H	H	H	B	A	H	A	B	B	H	H	B	H	B	A	B	B	B	H	H	H	B	B	A	H	B	A
2_07050	1	19.505	H	H	B	H	H	B	H	A	A	A	H	H	H	H	A	B	H	H	B	A	H	H	H	B	A	H	A	B	B	H	H	B	H	B	A	B	B	B	H	H	H	B	B	A	H	B	A
2_07805	1	19.505	H	H	B	H	H	B	H	A	A	A	H	H	H	H	A	B	H	H	B	A	H	H	H	B	A	H	A	B	B	H	H	B	H	B	A	B	B	B	H	H	H	B	B	A	H	B	A
2_13395	1	19.505	H	H	B	H	H	B	H	A	A	A	H	H	H	H	A	B	H	H	B	A	H	H	H	B	A	H	A	B	B	H	H	B	H	B	A	B	B	B	H	H	H	B	B	A	H	B	A
2_13396	1	19.505	H	H	B	H	H	B	H	A	-	A	H	H	H	H	A	B	H	H	B	A	H	H	H	B	A	H	A	B	B	H	H	B	H	B	A	B	B	B	H	H	H	B	B	A	H	B	A
2_14628	1	19.505	H	H	B	H	H	B	H	A	A	A	H	H	H	H	A	B	H	H	B	A	H	H	H	B	A	H	A	B	B	H	H	B	H	B	A	B	B	B	H	H	H	B	B	A	H	B	A
2_14629	1	19.505	H	H	B	H	H	B	H	A	A	A	H	H	H	H	A	B	H	H	B	A	H	H	H	B	A	H	A	B	B	H	H	B	H	B	A	B	B	B	H	H	H	B	B	A	H	B	A
2_14748	1	19.505	H	H	B	H	H	B	H	A	A	A	H	H	H	H	A	B	H	H	B	A	H	H	H	B	A	H	A	B	B	H	H	B	H	B	A	B	B	B	H	H	H	B	B	A	H	B	A
2_14749	1	19.505	H	H	B	H	H	B	H	A	A	A	H	H	H	H	A	B	H	H	B	A	H	H	H	B	A	H	A	B	B	H	H	B	H	B	A	B	B	B	H	H	H	B	B	A	H	B	A
2_17665	1	19.505	H	H	B	H	H	B	H	A	A	A	H	H	H	H	A	B	H	H	B	A	H	H	H	B	A	H	A	B	B	H	H	B	H	B	A	B	B	B	H	H	H	B	B	A	H	B	A
2_17666	1	19.505	H	H	B	H	H	B	H	A	A	A	H	H	H	H	A	B	H	H	B	A	H	H	H	B	A	H	A	B	B	H	H	B	H	B	A	B	B	B	H	H	H	B	B	A	H	B	A
2_19263	1	19.505	H	H	B	H	H	B	H	A	A	A	H	H	H	H	A	B	H	H	B	A	H	H	H	B	A	H	A	B	B	H	H	B	H	B	A	B	B	B	H	H	H	B	B	A	H	B	A
2_19264	1	19.505	H	H	B	H	H	B	H	A	A	A	H	H	H	H	A	B	H	H	B	A	H	H	H	B	A	H	A	B	B	H	H	B	H	B	A	B	B	B	H	H	H	B	B	A	H	B	A
2_20336	1	19.505	H	H	B	H	H	B	H	A	A	A	H	H	H	H	A	B	H	H	B	A	H	H	H	B	A	H	A	B	B	H	H	B	H	B	A	B	B	B	H	H	H	B	B	A	H	B	A
2_20479	1	19.505	H	H	B	H	H	B	H	A	A	A	H	H	H	H	A	B	H	H	B	A	H	H	H	B	A	H	A	B	B	H	H	B	H	B	A	B	B	B	H	H	H	B	B	A	H	B	A
2_21632	1	19.505	H	H	B	H	H	B	H	A	A	A	H	H	H	H	A	B	H	H	B	A	H	H	H	B	A	H	A	B	B	H	H	B	H	B	A	B	B	B	H	H	H	B	B	A	H	B	A
2_21633	1	19.505	H	H	B	H	H	B	H	A	A	A	H	H	H	H	A	B	H	H	B	A	H	H	H	B	A	H	A	B	B	H	H	B	H	B	A	B	B	B	H	H	H	B	B	A	H	B	A
2_23564	1	19.505	H	H	B	H	H	B	H	A	A	A	H	H	H	H	A	B	H	H	B	A	H	H	H	B	A	H	A	B	B	H	H	B	H	B	A	B	B	B	H	H	H	B	B	A	H	B	A
2_25419	1	19.505	H	H	B	H	H	B	H	A	A	A	H	H	H	H	A	B	H	H	B	A	H	H	H	B	A	H	A	B	B	H	H	B	H	B	A	B	B	B	H	H	H	B	B	A	H	B	A
2_25420	1	19.505	H	H	B	H	H	B	H	A	A	A	H	H	H	H	A	B	H	H	B	A	H	H	H	B	A	H	A	B	B	H	H	B	H	B	A	B	B	B	H	H	H	B	B	A	H	B	A
2_25743	1	19.505	H	H	B	H	H	B	H	A	A	A	H	H	H	H	A	B	H	H	B	A	H	H	H	B	A	H	A	B	B	H	H	B	H	B	A	B	B	B	H	H	H	B	B	A	H	B	A
2_25744	1	19.505	H	H	B	H	H	B	H	A	A	A	H	H	H	H	A	B	H	H	B	A	H	H	H	B	A	H	A	B	B	H	H	B	H	B	A	B	B	B	H	H	H	B	B	A	H	B	A
2_26975	1	19.505	H	H	B	H	H	B	H	A	A	A	H	H	H	H	A	B	H	H	B	A	H	H	H	B	A	H	A	B	B	H	H	B	H	B	A	B	B	B	H	H	H	B	B	A	H	B	A
2_26976	1	19.505	H	H	B	H	H	B	H	A	A	A	H	H	H	H	A	B	H	H	B	A	H	H	H	B	A	H	A	B	B	H	H	B	H	B	A	B	B	B	H	H	H	B	B	A	H	B	A
2_27631	1	19.505	H	H	B	H	H	B	H	A	A	A	H	H	H	H	A	B	H	H	B	A	H	H	H	B	A	H	A	B	B	H	H	B	H	B	A	B	B	B	H	H	H	B	B	A	H	B	A
2_30484	1	19.505	H	H	B	H	H	B	H	A	A	A	H	H	H	H	A	B	H	H	B	A	H	H	H	B	A	H	A	B	B	H	H	B	H	B	A	B	B	B	H	H	H	B	B	A	H	B	A
2_30485	1	19.505	H	H	B	H	H	B	H	A	A	A	H	H	H	H	A	B	H	H	B	A	H	H	H	B	A	H	A	B	B	H	H	B	H	B	A	B	B	B	H	H	H	B	B	A	H	B	A
2_31220	1	19.505	H	H	B	H	H	B	H	A	A	A	H	H	H	H	A	B	H	H	B	A	H	H	H	B	A	H	A	B	B	H	H	B	H	B	A	B	B	B	H	H	H	B	B	A	H	B	A
2_31876	1	19.505	H	H	B	H	H	B	H	A	A	A	H	H	H	H	A	B	H	H	B	A	H	H	H	B	A	H	A	B	B	H	H	B	H	B	A	B	B	B	H	H	H	B	B	A	H	B	A
2_37680	1	19.505	H	H	B	H	H	B	H	A	A	A	H	H	H	H	A	B	H	H	B	A	H	H	H	B	A	H	A	B	B	H	H	B	H	B	A	B	B	B	H	H	H	B	B	A	H	B	A
2_37681	1	19.505	H	H	B	H	H	B	H	A	A	A	H	H	H	H	A	B	H	H	B	A	H	H	H	B	A	H	A	B	B	H	H	B	H	B	A	B	B	B	H	H	H	B	B	A	H	B	A
2_38566	1	19.505	H	H	B	H	H	B	H	A	A	A	H	H	H	H	A	B	H	H	B	A	H	H	H	B	A	H	A	B	B	H	H	B	H	B	A	B	B	B	H	H	H	B	B	A	H	B	A
2_38567	1	19.505	H	H	-	H	H	B	H	A	-	A	H	H	H	H	A	B	H	H	B	A	H	H	H	B	A	H	A	-	-	H	H	B	H	-	A	-	B	-	H	H	H	-	B	A	H	B	A
2_38933	1	19.505	H	H	B	H	H	B	H	A	A	A	H	H	H	H	A	B	H	H	B	A	H	H	H	B	A	H	A	B	B	H	H	B	H	B	A	B	B	B	H	H	H	B	B	A	H	B	A
2_39167	1	19.505	-	-	B	H	H	B	H	A	A	A	H	H	H	H	A	B	H	H	B	A	H	H	H	B	A	H	A	B	B	H	H	B	H	B	A	B	B	B	H	H	H	B	B	A	H	B	A
2_39202	1	19.505	H	H	B	H	H	B	H	A	A	A	H	H	H	H	A	B	H	H	B	A	H	H	H	B	A	H	A	B	B	H	H	B	H	B	A	B	B	B	H	H	H	B	B	A	H	B	A
2_39937	1	19.505	H	H	B	H	H	B	H	A	A	A	H	H	H	H	A	B	H	H	B	A	H	H	H	B	A	H	A	B	B	H	H	B	H	B	A	B	B	B	H	H	H	B	B	A	H	B	A
2_40210	1	19.505	H	H	B	H	H	B	H	A	A	A	H	H	H	H	A	B	H	H	B	A	H	H	H	B	A	H	A	B	B	H	H	B	H	B	A	B	B	B	H	H	H	B	B	A	H	B	A
2_41868	1	19.505	H	H	B	H	H	B	H	A	A	A	H	H	H	H	A	B	H	H	B	A	H	H	H	B	A	H	A	B	B	H	H	B	H	B	A	B	B	B	H	H	H	B	B	A	H	B	A
2_43327	1	19.505	H	H	B	H	H	-	H	A	A	-	H	H	H	H	A	B	H	H	B	A	H	H	H	B	A	H	A	B	B	H	H	B	H	B	A	B	B	-	H	H	H	B	B	A	H	B	A
2_43640	1	19.505	H	H	B	H	H	B	H	A	A	A	H	H	H	H	A	B	H	H	B	A	H	H	H	B	A	H	A	B	B	H	H	B	H	B	A	B	B	B	H	H	H	B	B	A	H	B	A
2_44394	1	19.505	H	H	B	H	H	B	H	A	A	A	H	H	H	H	A	B	H	H	B	A	H	H	H	B	A	H	A	B	B	H	H	B	H	B	A	B	B	B	H	H	H	B	B	A	H	B	A
2_45787	1	19.505	H	H	B	H	H	B	H	A	A	A	H	H	H	H	A	B	H	H	B	A	H	H	H	B	A	H	A	B	B	H	H	B	H	B	A	B	B	B	H	H	H	B	B	A	H	B	A
2_45890	1	19.505	H	H	B	H	H	B	H	A	A	A	H	H	H	H	A	B	H	H	B	A	H	H	H	B	A	H	A	B	B	H	H	B	H	B	A	B	B	B	H	H	H	B	B	A	H	B	A
2_46011	1	19.505	H	H	B	H	H	B	H	A	A	A	H	H	H	H	A	B	H	H	B	A	H	H	H	B	A	H	A	B	B	H	H	B	H	B	A	B	B	B	H	H	H	B	B	A	H	B	A
2_46328	1	19.505	H	H	B	H	H	B	H	A	A	A	H	H	H	H	A	B	H	H	B	A	H	H	H	B	A	H	A	B	B	H	H	B	H	B	A	B	B	B	H	H	H	B	B	A	H	B	A
2_46491	1	19.505	H	H	B	H	H	B	H	A	A	A	H	H	H	H	A	B	H	H	B	A	H	H	H	B	A	H	A	B	B	H	H	B	H	B	A	B	B	B	H	H	H	B	B	A	H	B	A
2_46693	1	19.505	H	H	B	H	H	B	H	A	A	A	H	H	H	H	A	B	H	H	B	A	H	H	H	B	A	H	A	B	B	H	H	B	H	B	A	B	B	B	H	H	H	B	B	A	H	B	A
2_47161	1	19.505	H	H	B	H	H	B	H	A	A	A	H	H	H	H	A	B	H	H	B	A	H	H	H	B	A	H	A	B	B	H	H	B	H	B	A	B	B	B	H	H	H	B	B	A	H	B	A
2_47388	1	19.505	H	H	B	H	H	B	H	A	A	A	H	H	H	H	A	B	H	H	B	A	H	H	H	B	A	H	A	B	B	H	H	B	H	B	A	B	B	B	H	H	H	B	B	A	H	B	A
2_47763	1	19.505	H	H	B	H	H	B	H	A	A	A	H	H	H	H	A	B	H	H	B	A	H	H	H	B	A	H	A	B	B	H	H	B	H	B	A	B	B	B	H	H	H	B	B	A	H	B	A
2_48354	1	19.505	H	H	B	H	H	B	H	A	A	A	H	H	H	H	A	B	H	H	B	A	H	H	H	B	A	H	A	B	B	H	H	B	H	B	A	B	B	B	H	H	H	B	B	A	H	B	A
2_49295	1	19.505	H	H	B	H	H	B	H	A	A	A	H	H	H	H	A	B	H	H	B	A	H	H	H	B	A	H	A	B	B	H	H	B	H	B	A	B	B	B	H	H	H	B	B	A	H	B	A
2_49432	1	19.505	H	H	B	H	H	B	H	A	A	A	H	H	H	H	A	B	H	H	B	A	H	H	H	B	A	H	A	B	B	H	H	B	H	B	A	B	B	B	H	H	H	B	B	A	H	B	A
2_50246	1	19.505	H	H	B	H	H	B	H	A	A	A	H	H	H	H	A	B	H	H	B	A	H	H	H	B	A	H	A	B	B	H	H	B	H	B	A	B	B	B	H	H	H	B	B	A	H	B	A
2_50630	1	19.505	H	H	B	H	H	B	H	A	A	A	H	H	H	H	A	B	H	H	B	A	H	H	H	B	A	H	A	B	B	H	H	B	H	B	A	B	B	B	H	H	H	B	B	A	H	B	A
2_51986	1	19.505	H	H	B	H	H	B	H	A	A	A	H	H	H	H	A	B	H	H	B	A	H	H	H	B	A	H	A	B	B	H	H	B	H	B	A	B	B	B	H	H	H	B	B	A	H	B	A
2_52255	1	19.505	H	H	B	H	H	B	H	A	A	A	H	H	H	H	A	B	H	H	B	A	H	H	H	B	A	H	A	B	B	H	H	B	H	B	A	B	B	B	H	H	H	B	B	A	H	B	A
2_52384	1	19.505	H	H	B	H	H	B	H	A	A	A	H	H	H	H	A	B	H	H	B	A	H	H	H	B	A	H	A	B	B	H	H	B	H	B	A	B	B	B	H	H	H	B	B	A	H	B	A
2_53564	1	19.505	H	H	B	H	H	B	H	A	A	A	H	H	H	H	A	B	H	H	B	A	H	H	H	B	A	H	A	B	B	H	H	B	H	B	A	B	B	B	H	H	H	B	B	A	H	B	A
2_53890	1	19.505	H	H	B	H	H	B	H	A	A	A	H	H	H	H	A	B	H	H	B	A	H	H	H	B	A	H	A	B	B	H	H	B	H	B	A	B	B	B	H	H	H	B	B	A	H	B	A
2_54398	1	19.505	H	H	B	H	H	B	H	A	A	A	H	H	H	H	A	B	H	H	B	A	H	H	H	B	A	H	A	B	B	H	H	B	H	B	A	B	B	B	H	H	H	B	B	A	H	B	A
2_54840	1	19.505	H	H	B	H	H	B	H	A	A	A	H	H	H	H	A	B	H	H	B	A	H	H	H	B	A	H	A	B	B	H	H	B	H	B	A	B	B	B	H	H	H	B	B	A	H	B	A
2_54942	1	19.505	H	H	B	H	H	B	H	A	A	A	H	H	H	H	A	B	H	H	B	A	H	H	H	B	A	H	A	B	B	H	H	B	H	B	A	B	B	B	H	H	H	B	B	A	H	B	A
2_40157	1	20.429	-	H	B	H	H	-	H	A	A	A	H	H	H	H	A	B	H	H	B	A	H	H	H	B	A	H	A	B	B	H	H	B	H	B	A	B	B	-	H	H	H	B	B	A	H	B	A
2_42488	1	21.858	H	H	B	H	H	B	H	A	A	A	H	H	H	H	A	B	H	H	B	A	H	H	H	B	A	H	A	B	B	H	H	B	H	B	A	B	B	B	H	H	H	B	B	A	H	B	A
2_55166	1	21.858	H	H	B	H	H	B	H	A	A	A	H	H	H	H	A	B	H	H	B	A	H	H	H	B	A	H	A	B	B	H	H	B	H	B	A	B	B	B	H	H	H	B	B	A	H	B	A
2_01900	1	22.699	H	H	B	H	-	B	H	A	A	A	H	H	H	H	A	B	H	H	B	A	H	H	H	B	A	H	A	B	B	H	H	B	H	B	A	B	B	B	H	H	H	B	B	A	H	B	A
2_04023	1	22.699	H	H	B	H	H	B	H	A	A	A	H	H	H	H	A	B	H	H	B	A	H	H	H	B	A	H	A	B	B	H	H	B	H	B	A	B	B	B	H	H	H	B	B	A	H	B	A
2_04024	1	22.699	H	H	B	H	H	B	H	A	A	A	H	H	H	H	A	B	H	H	B	A	H	H	H	B	A	H	A	B	B	H	H	B	H	B	A	B	B	B	H	H	H	B	B	A	H	B	A
2_09445	1	22.699	H	H	B	H	H	B	H	A	A	A	H	H	H	H	A	B	H	H	B	A	H	H	H	B	A	H	A	B	B	H	H	B	H	B	A	B	B	B	H	H	H	B	B	A	H	B	A
2_09446	1	22.699	H	H	B	H	H	B	H	A	A	A	H	H	H	H	A	B	H	H	B	A	H	H	H	B	A	H	A	B	B	H	H	B	H	B	A	B	B	B	H	H	H	B	B	A	H	B	A
2_12189	1	22.699	H	H	B	H	H	B	H	A	A	A	H	H	H	H	A	B	H	H	B	A	H	H	H	B	A	H	A	B	B	H	H	B	H	B	A	B	B	B	H	H	H	B	B	A	H	B	A
2_12190	1	22.699	H	H	B	H	H	B	H	A	A	A	H	H	H	H	A	B	H	H	B	A	H	H	H	B	A	H	A	B	B	H	H	B	H	B	A	B	B	B	H	H	H	B	B	A	H	B	A
2_12428	1	22.699	H	H	B	H	H	B	H	A	A	A	H	H	H	H	A	B	H	H	B	A	H	H	H	B	A	H	A	B	B	H	H	B	H	B	A	B	B	B	H	H	H	B	B	A	H	B	A
2_12429	1	22.699	H	H	B	H	H	B	H	A	A	A	H	H	H	H	A	B	H	H	B	A	H	H	H	B	A	H	A	B	B	H	H	B	H	B	A	B	B	B	H	H	H	B	B	A	H	B	A
2_13057	1	22.699	H	H	B	H	H	B	H	A	A	A	H	H	H	H	A	B	H	H	B	A	H	H	H	B	A	H	A	B	B	H	H	B	H	B	A	B	B	B	H	H	H	B	B	A	H	B	A
2_13430	1	22.699	H	H	B	H	H	B	H	A	A	A	H	H	H	H	A	B	H	H	B	A	H	H	H	B	A	H	A	B	B	H	H	B	H	B	A	B	B	B	H	H	H	B	B	A	H	B	A
2_13431	1	22.699	H	H	B	H	H	B	H	A	A	A	H	H	H	H	A	B	H	H	B	A	H	H	H	B	A	H	A	B	B	H	H	B	H	B	A	B	B	B	H	H	H	B	B	A	H	B	A
2_13433	1	22.699	H	H	B	H	H	B	H	A	A	A	H	H	H	H	A	B	H	H	B	A	H	H	H	B	A	H	A	B	B	H	H	B	H	B	A	B	B	B	H	H	H	B	B	A	H	B	A
2_14906	1	22.699	H	H	B	H	H	B	H	A	A	A	H	H	H	H	A	B	H	H	B	A	H	H	H	B	A	H	A	B	B	H	H	B	H	B	A	B	B	B	H	H	H	B	B	A	H	B	A
2_14907	1	22.699	H	H	B	H	H	B	H	A	A	A	H	H	H	H	A	B	H	H	B	A	H	H	H	B	A	H	A	B	B	H	H	B	H	B	A	B	B	B	H	H	H	B	B	A	H	B	A
2_14908	1	22.699	H	H	B	H	H	B	H	A	A	A	H	H	H	H	A	B	H	H	B	A	H	H	H	B	A	H	A	B	B	H	H	B	H	B	A	B	B	B	H	H	H	B	B	A	H	B	A
2_14909	1	22.699	H	H	B	H	H	B	H	A	A	A	H	H	H	H	A	B	H	H	B	A	H	H	H	B	A	H	A	B	B	H	H	B	H	B	A	B	B	B	H	H	H	B	B	A	H	B	A
2_18414	1	22.699	H	H	B	H	H	B	H	A	A	A	H	H	H	H	A	B	H	H	B	A	H	H	H	B	A	H	A	B	B	H	H	B	H	B	A	B	B	B	H	H	H	B	B	A	H	B	A
2_26155	1	22.699	H	H	B	H	H	B	H	A	A	A	H	H	H	H	A	B	H	H	B	A	H	H	H	B	A	H	A	B	B	H	H	B	H	B	A	B	B	B	H	H	H	B	B	A	H	B	A
2_26156	1	22.699	H	H	B	H	H	B	H	A	A	A	H	H	H	H	A	B	H	H	B	A	H	H	H	B	A	H	A	B	B	H	H	B	H	B	A	B	B	B	H	H	H	B	B	A	H	B	A
2_44220	1	22.699	H	H	B	H	H	B	H	A	A	A	H	H	H	H	A	B	H	H	B	A	H	H	H	B	A	H	A	B	B	H	H	B	H	B	A	B	B	B	H	H	H	B	B	A	H	B	A
2_44619	1	22.699	H	H	B	H	H	B	H	A	A	A	H	H	H	H	A	B	H	H	B	A	H	H	H	B	A	H	A	B	B	H	H	B	H	B	A	B	B	B	H	H	H	B	B	A	H	B	A
2_48621	1	22.699	H	H	B	H	H	B	H	A	A	A	H	H	H	H	A	B	H	H	B	A	H	H	H	B	A	H	A	B	B	H	H	B	H	B	A	B	B	B	H	H	H	B	B	A	H	B	A
2_49338	1	22.699	H	H	B	H	H	B	H	A	A	A	H	H	H	H	A	B	H	H	B	A	H	H	H	B	A	H	A	B	B	H	H	B	H	B	A	B	B	B	H	H	H	B	B	A	H	B	A
2_51629	1	22.699	-	-	B	-	-	B	H	A	-	A	-	H	H	H	A	B	H	H	B	A	H	H	H	B	A	H	A	B	B	H	H	B	H	B	A	B	B	B	H	H	H	B	B	A	H	B	A
2_52898	1	22.699	H	H	B	H	H	B	H	A	A	A	H	H	H	H	A	B	H	H	B	A	H	H	H	B	A	H	A	B	B	H	H	B	H	B	A	B	B	B	H	H	H	B	B	A	H	B	A
2_55340	1	22.699	H	H	B	H	H	B	H	A	A	A	H	H	H	H	A	B	H	H	B	A	H	H	H	B	A	H	A	B	B	H	H	B	H	B	A	B	B	B	H	H	H	B	B	A	H	B	A
2_01901	1	23.203	-	-	B	-	-	B	H	-	H	-	H	H	H	H	A	B	H	-	B	A	H	H	-	B	A	H	A	B	B	H	H	B	H	B	A	B	B	B	H	H	H	B	B	A	H	B	A
2_19365	1	24.212	H	H	B	H	H	B	H	A	A	A	H	H	H	H	A	B	H	H	B	A	H	H	H	B	A	H	A	B	B	A	H	B	H	B	A	B	B	B	H	H	H	B	B	A	H	B	A
2_19366	1	24.212	H	H	B	H	H	B	H	A	A	A	H	H	H	H	A	B	H	H	B	A	H	H	H	B	A	H	A	B	B	A	H	B	H	B	A	B	B	B	H	H	H	B	B	A	H	B	A
2_21193	1	24.212	H	H	B	H	H	B	H	A	A	A	H	H	H	H	A	B	H	H	B	A	H	H	H	B	A	H	A	B	B	A	H	B	H	B	A	B	B	B	H	H	H	B	B	A	H	B	A
2_22638	1	24.212	H	H	B	H	H	B	H	A	A	A	H	H	H	H	A	B	H	H	B	A	H	H	H	B	A	H	A	B	B	A	H	B	H	B	A	B	B	B	H	H	H	B	B	A	H	B	A
2_22639	1	24.212	H	H	B	H	H	B	H	A	A	A	H	H	H	H	A	B	H	H	B	A	H	H	H	B	A	H	A	B	B	A	H	B	H	B	A	B	B	B	H	H	H	B	B	A	H	B	A
2_23102	1	24.212	H	H	B	H	H	B	H	A	A	A	H	H	H	H	A	B	H	H	B	A	H	H	H	B	A	H	A	B	B	A	H	B	H	B	A	B	B	B	H	H	H	B	B	A	H	B	A
2_23103	1	24.212	H	H	B	H	H	B	H	A	A	A	H	H	H	H	A	B	H	H	B	A	H	H	H	B	A	H	A	B	B	A	H	B	H	B	A	B	B	B	H	H	H	B	B	A	H	B	A
2_23944	1	24.212	H	H	B	H	H	B	H	A	A	A	H	H	H	H	A	B	H	H	B	A	H	H	H	B	A	H	A	B	B	A	H	B	H	B	A	B	B	B	H	H	H	B	B	A	H	B	A
2_23945	1	24.212	H	H	B	H	H	B	H	A	A	A	H	H	H	H	A	B	H	H	B	A	H	H	H	B	A	H	A	B	B	A	H	B	H	B	A	B	B	B	H	H	H	B	B	A	H	B	A
2_27494	1	24.212	H	H	B	H	H	B	H	A	A	A	H	H	H	H	A	B	H	H	B	A	H	H	H	B	A	H	A	B	B	A	H	B	H	B	A	B	B	B	H	H	H	B	B	A	H	B	A
2_45027	1	24.212	H	H	B	H	H	B	H	A	A	A	H	H	H	H	A	B	H	H	B	A	H	H	H	B	A	H	A	B	B	A	H	B	H	B	A	B	B	B	H	H	H	B	B	A	H	B	A
2_18396	1	24.632	H	H	B	H	H	B	H	A	A	A	H	H	H	H	A	B	H	H	B	A	H	H	H	B	A	B	A	B	B	A	H	B	H	B	A	B	B	B	H	H	H	B	B	A	H	B	A
2_31149	1	24.632	H	H	B	H	H	B	H	A	A	A	H	H	H	H	A	B	H	H	B	A	H	H	H	B	A	B	A	B	B	A	H	B	H	B	A	B	B	B	H	H	H	B	B	A	H	B	A
2_41628	1	24.632	H	H	B	H	H	B	H	A	A	A	H	H	H	H	A	B	H	H	B	A	H	H	H	B	A	B	A	B	B	A	H	B	H	B	A	B	B	B	H	H	H	B	B	A	H	B	A
2_39826	1	25.977	H	-	B	-	-	B	H	H	H	A	H	H	H	H	A	B	H	H	B	A	H	H	H	B	A	B	H	B	B	A	H	B	H	B	A	B	B	B	H	H	H	B	B	A	H	B	A
2_09139	1	26.817	H	H	B	H	H	B	H	A	A	A	H	H	H	H	A	B	H	H	B	A	H	H	H	B	A	B	H	B	B	A	H	B	H	B	A	B	B	B	H	H	H	B	B	A	H	B	A
2_17306	1	26.817	H	H	B	H	H	B	H	A	A	A	H	H	H	H	A	B	H	H	B	A	H	H	H	B	A	B	H	B	B	A	H	B	H	B	A	B	B	B	H	H	H	B	B	A	H	B	A
2_17307	1	26.817	H	H	B	H	H	B	H	A	A	A	H	H	H	H	A	B	H	H	B	A	H	H	H	B	A	B	H	B	B	A	H	B	H	B	A	B	B	B	H	H	H	B	B	A	H	B	A
2_37643	1	26.817	H	H	B	H	H	B	H	A	A	-	H	H	H	H	A	B	H	H	B	A	H	H	H	B	A	B	H	B	B	A	H	B	H	B	A	B	B	B	H	H	H	B	B	A	H	B	A
2_42282	1	26.817	H	H	-	H	H	B	H	A	A	A	H	H	H	H	A	B	H	H	B	A	H	H	H	B	A	B	H	B	B	A	H	B	H	B	A	B	B	B	H	H	H	B	B	A	H	B	A
2_43180	1	26.817	H	H	B	H	H	B	H	A	A	A	H	H	H	H	A	B	H	H	B	A	H	H	H	B	A	B	H	B	B	A	H	B	H	B	A	B	B	B	H	H	H	B	B	A	H	B	A
2_12261	1	27.237	H	H	B	H	H	B	H	A	A	A	H	H	H	H	A	B	H	H	B	A	H	H	H	B	A	B	H	B	B	A	H	B	H	B	A	B	B	B	H	H	H	B	B	A	H	B	A
2_12262	1	27.237	H	H	B	H	H	B	H	A	A	A	H	H	H	H	A	B	H	H	B	A	H	H	H	B	A	B	H	B	B	A	H	B	H	B	A	B	B	B	H	H	H	B	B	A	H	B	A
2_22731	1	27.237	H	H	B	H	H	B	H	A	A	A	H	H	H	H	A	B	H	H	B	A	H	H	H	B	A	B	H	B	B	A	H	B	H	B	A	B	B	B	H	H	H	B	B	A	H	B	A
2_29079	1	27.237	H	H	B	H	H	B	H	A	A	A	H	H	H	H	A	B	H	H	B	A	H	H	H	B	A	B	H	B	B	A	H	B	H	B	A	B	B	B	H	H	H	B	B	A	H	B	A
2_29080	1	27.237	H	H	B	H	H	B	H	A	A	A	H	H	H	H	A	B	H	H	B	A	H	H	H	B	A	B	H	B	B	A	H	B	H	B	A	B	B	B	H	H	H	B	B	A	H	B	A
2_30751	1	27.237	H	H	B	H	H	B	H	A	A	A	H	H	H	H	A	B	H	H	B	A	H	H	H	B	A	B	H	B	B	A	H	B	H	B	A	B	B	B	H	H	H	B	B	A	H	B	A
2_46985	1	27.237	H	H	B	H	H	B	H	A	A	A	H	H	H	H	A	B	H	H	B	A	H	H	H	B	A	B	H	B	B	A	H	B	H	B	A	B	B	B	H	H	H	B	B	A	H	B	A
2_53574	1	27.237	H	H	B	H	H	B	H	A	A	A	H	H	H	H	A	B	H	H	B	A	H	H	H	B	A	B	H	B	B	A	H	B	H	B	A	B	B	B	H	H	H	B	B	A	H	B	A
1_1138	1	27.657	H	H	B	H	H	B	H	A	A	A	H	H	H	H	A	B	H	H	B	A	H	H	H	B	A	B	H	H	B	A	H	B	H	B	A	B	B	B	H	H	H	B	B	A	H	B	A
2_02193	1	27.657	H	H	B	H	H	B	H	A	A	A	H	H	H	H	A	B	H	H	B	A	H	H	H	B	A	B	H	H	B	A	H	B	H	B	A	B	B	B	H	H	H	B	B	A	H	B	A
2_05348	1	27.657	H	H	B	H	H	B	H	A	A	A	H	H	H	H	A	B	H	H	B	A	H	H	H	B	A	B	H	H	B	A	H	B	H	B	A	B	B	B	H	H	H	B	B	A	H	B	A
2_05349	1	27.657	H	H	B	H	H	B	H	A	A	A	H	H	H	H	A	B	H	H	B	A	H	H	H	B	A	B	H	H	B	A	H	B	H	B	A	B	B	B	H	H	H	B	B	A	H	B	A
2_05365	1	27.657	H	H	B	H	H	B	H	A	A	A	H	H	H	H	A	B	H	H	B	A	H	H	H	B	A	B	H	H	B	A	H	B	H	B	A	B	B	B	H	H	H	B	B	A	H	B	A
2_05366	1	27.657	H	H	B	H	H	B	H	A	A	A	H	H	H	H	A	B	H	H	B	A	H	H	H	B	A	B	H	H	B	A	H	B	H	B	A	B	B	B	H	H	H	B	B	A	H	B	A
2_05811	1	27.657	H	H	B	H	H	B	H	A	A	A	H	H	H	H	A	B	H	H	B	A	H	H	H	B	A	B	H	H	B	A	H	B	H	B	A	B	B	B	H	H	H	B	B	A	H	B	A
2_07979	1	27.657	H	H	B	H	H	B	H	A	A	A	H	H	H	H	A	B	H	H	B	A	H	H	H	B	A	B	H	H	B	A	H	B	H	B	A	B	B	B	H	H	H	B	B	A	H	B	A
2_12570	1	27.657	H	H	B	H	H	B	H	A	A	A	H	H	H	H	A	B	H	H	B	A	H	H	H	B	A	B	H	H	B	A	H	B	H	B	A	B	B	B	H	H	H	B	B	A	H	B	A
2_12811	1	27.657	H	H	B	H	H	B	H	A	A	A	H	H	H	H	A	B	H	H	B	A	H	H	H	B	A	B	H	H	B	A	H	B	H	B	A	B	B	B	H	H	H	B	B	A	H	B	A
2_12812	1	27.657	H	H	B	H	H	B	H	A	A	A	H	H	H	H	A	B	H	H	B	A	H	H	H	B	A	B	H	H	B	A	H	B	H	B	A	B	B	B	H	H	H	B	B	A	H	B	A
2_13484	1	27.657	H	H	B	H	H	B	H	A	A	A	H	H	H	H	A	B	H	H	B	A	H	H	H	B	A	B	H	H	B	A	H	B	H	B	A	B	B	B	H	H	H	B	B	A	H	B	A
2_13485	1	27.657	H	H	B	H	H	B	H	A	A	A	H	H	H	H	A	B	H	H	B	A	H	H	H	B	A	B	H	H	B	A	H	B	H	B	A	B	B	B	H	H	H	B	B	A	H	B	A
2_17331	1	27.657	H	H	B	H	H	B	H	A	A	A	H	H	H	H	A	B	H	H	B	A	H	H	H	B	A	B	H	H	B	A	H	B	H	B	A	B	B	B	H	H	H	B	B	A	H	B	A
2_17332	1	27.657	H	H	B	H	H	B	H	A	A	A	H	H	H	H	A	B	H	H	B	A	H	H	H	B	A	B	H	H	B	A	H	B	H	B	A	B	B	B	H	H	H	B	B	A	H	B	A
2_20389	1	27.657	H	H	B	H	H	B	H	A	A	A	H	H	H	H	A	B	H	H	B	A	H	H	H	B	A	B	H	H	B	A	H	B	H	B	A	B	B	B	H	H	H	B	B	A	H	B	A
2_20390	1	27.657	H	H	B	H	H	B	H	A	A	A	H	H	H	H	A	B	H	H	B	A	H	H	H	B	A	B	H	H	B	A	H	B	H	B	A	B	B	B	H	H	H	B	B	A	H	B	A
2_20911	1	27.657	H	H	B	H	H	B	H	A	A	A	H	H	H	H	A	B	H	H	B	A	H	H	H	B	A	B	H	H	B	A	H	B	H	B	A	B	B	B	H	H	H	B	B	A	H	B	A
2_22530	1	27.657	H	H	B	H	H	B	H	A	A	A	H	H	H	H	A	B	H	H	B	A	H	H	H	B	A	B	H	H	B	A	H	B	H	B	A	B	B	B	H	H	H	B	B	A	H	B	A
2_27695	1	27.657	H	H	B	H	H	B	H	A	A	A	H	H	H	H	A	B	H	H	B	A	H	H	H	B	A	B	H	H	B	A	H	B	H	B	A	B	B	B	H	H	H	B	B	A	H	B	A
2_31257	1	27.657	H	H	B	H	H	B	H	A	A	A	H	H	H	H	A	B	H	H	B	A	H	H	H	B	A	B	H	H	B	A	H	B	H	B	A	B	B	B	H	H	H	B	B	A	H	B	A
2_31348	1	27.657	H	H	B	H	H	B	H	A	A	A	H	H	H	H	A	B	H	H	B	A	H	H	H	B	A	B	H	H	B	A	H	B	H	B	A	B	B	B	H	H	H	B	B	A	H	B	A
2_31698	1	27.657	H	H	B	H	H	B	H	A	A	A	H	H	H	H	A	B	H	H	B	A	H	H	H	B	A	B	H	H	B	A	H	B	H	B	A	B	B	B	H	H	H	B	B	A	H	B	A
2_40974	1	27.657	H	H	B	H	H	B	H	A	A	A	H	H	H	H	A	B	H	H	B	A	H	H	H	B	A	B	H	H	B	A	H	B	H	B	A	B	B	B	H	H	H	B	B	A	H	B	A
2_44985	1	27.657	H	H	B	H	H	B	H	A	A	A	H	H	H	H	A	B	H	H	B	A	H	H	H	B	A	B	H	H	B	A	H	B	H	B	A	B	B	B	H	H	H	B	B	A	H	B	A
2_47290	1	27.657	H	H	B	H	H	B	H	A	A	A	H	H	H	H	A	B	H	H	B	A	H	H	H	B	A	B	H	H	B	A	H	B	H	B	A	B	B	B	H	H	H	B	B	A	H	B	A
2_47796	1	27.657	H	H	-	H	H	B	H	A	A	A	H	H	H	H	A	B	H	H	B	A	H	H	H	B	A	B	H	H	B	A	H	B	H	B	A	B	B	B	H	H	H	B	B	A	H	B	A
2_51863	1	27.657	H	H	B	H	H	B	H	A	A	A	H	H	H	H	A	B	H	H	B	A	H	H	H	B	A	B	H	H	B	A	H	B	H	B	A	B	B	B	H	H	H	B	B	A	H	B	A
2_53737	1	27.657	H	H	B	H	H	B	H	A	A	A	H	H	H	H	A	B	H	H	B	A	H	H	H	B	A	B	H	H	B	A	H	B	H	B	A	B	B	B	H	H	H	B	B	A	H	B	A
2_26171	1	30.265	H	H	H	H	H	H	H	A	A	A	H	H	H	H	A	B	H	A	B	A	H	H	H	B	A	B	H	H	B	A	H	B	H	B	A	B	B	B	H	H	H	B	B	A	H	B	A
2_32677	1	30.265	H	H	H	H	H	H	H	A	A	A	H	H	H	H	A	B	H	A	B	A	H	H	H	B	A	B	H	H	B	A	H	B	H	B	A	B	B	B	H	H	H	B	B	A	H	B	A
2_53515	1	30.685	H	H	H	H	H	H	H	A	A	A	H	H	H	H	A	B	H	A	B	A	H	H	H	B	A	B	H	H	B	A	H	B	H	B	A	B	B	B	H	H	H	B	B	A	H	B	A
1_0155	1	31.105	H	H	H	H	H	H	H	A	A	A	H	H	H	H	A	B	H	A	B	A	H	H	H	B	A	B	H	H	B	A	H	B	H	B	A	B	B	B	H	H	H	B	B	A	H	B	A
2_00245	1	31.105	H	H	H	H	H	H	H	A	A	A	H	H	H	H	A	B	H	A	B	A	H	H	H	B	A	B	H	H	B	A	H	B	H	B	A	B	B	B	H	H	H	B	B	A	H	B	A
2_03285	1	31.105	H	H	H	H	H	H	H	A	A	A	H	H	H	H	A	B	H	A	B	A	H	H	H	B	A	B	H	H	B	A	H	B	H	B	A	B	B	B	H	H	H	B	B	A	H	B	A
2_09840	1	31.105	H	H	H	H	H	H	H	A	A	A	H	H	H	H	A	B	H	A	B	A	H	H	H	B	A	B	H	H	B	A	H	B	H	B	A	B	B	B	H	H	H	B	B	A	H	B	A
2_12312	1	31.105	H	H	H	H	H	H	H	A	A	A	H	H	H	H	A	B	H	A	B	A	H	H	H	B	A	B	H	H	B	A	H	B	H	B	A	B	B	B	H	H	H	B	B	A	H	B	A
2_23571	1	31.105	H	H	H	H	H	H	H	A	A	A	H	H	H	H	A	B	H	A	B	A	H	H	H	B	A	B	H	H	B	A	H	B	H	B	A	B	B	B	H	H	H	B	B	A	H	B	A
2_23572	1	31.105	H	H	H	H	H	H	H	A	A	A	H	H	H	H	A	B	H	A	B	A	H	H	H	B	A	B	H	H	B	A	H	B	H	B	A	B	B	B	H	H	H	B	B	A	H	B	A
2_24033	1	31.105	H	H	H	H	H	H	H	A	A	A	H	H	H	H	A	B	H	A	B	A	H	H	H	B	A	B	H	H	B	A	H	B	H	B	A	B	B	B	H	H	H	B	B	A	H	B	A
2_24034	1	31.105	H	H	H	H	H	H	H	A	A	A	H	H	H	H	A	B	H	A	B	A	H	H	H	B	A	B	H	H	B	A	H	B	H	B	A	B	B	B	H	H	H	B	B	A	H	B	A
2_26487	1	31.105	H	H	H	H	H	H	H	A	A	A	H	H	H	H	A	B	H	A	B	A	H	H	H	B	A	B	H	H	B	A	H	B	H	B	A	B	B	B	H	H	H	B	B	A	H	B	A
2_32377	1	31.105	H	H	H	H	H	H	H	A	A	A	H	H	H	H	A	B	H	A	B	A	H	H	H	B	A	B	H	H	B	A	H	B	H	B	A	B	B	B	H	H	H	B	B	A	H	B	A
2_45564	1	31.105	H	H	H	H	H	H	H	A	A	A	H	H	H	H	A	B	H	A	B	A	H	H	H	B	A	B	H	H	B	A	H	B	H	B	A	B	B	B	H	H	H	B	B	A	H	B	A
2_46059	1	31.105	H	H	H	H	H	H	H	A	A	A	H	H	H	H	A	B	H	A	B	A	H	H	H	B	A	B	H	H	B	A	H	B	H	B	A	B	B	B	H	H	H	B	B	A	H	B	A
2_49431	1	31.105	H	H	H	H	H	H	H	A	A	A	H	H	H	H	A	B	H	A	B	A	H	H	H	B	A	B	H	H	B	A	H	B	H	B	A	B	B	B	H	H	H	B	B	A	H	B	A
2_49624	1	31.105	H	H	H	H	H	H	H	A	A	A	H	H	H	H	A	B	H	A	B	A	H	H	H	B	A	B	H	H	B	A	H	B	H	B	A	B	B	B	H	H	H	B	B	A	H	B	A
2_52544	1	31.105	H	H	H	H	H	H	H	A	A	A	H	H	H	H	A	B	H	A	B	A	H	H	H	B	A	B	H	H	B	A	H	B	H	B	A	B	B	B	H	H	H	B	B	A	H	B	A
2_55598	1	31.105	H	H	H	H	H	H	H	A	A	A	H	H	H	H	A	B	H	A	B	A	H	H	H	B	A	B	H	H	B	A	H	B	H	B	A	B	B	B	H	H	H	B	B	A	H	B	A
2_11013	1	31.525	H	H	H	H	H	H	H	A	A	A	H	H	H	H	A	B	H	A	B	A	H	H	H	B	A	B	H	H	B	A	H	B	H	B	A	B	B	B	H	H	H	B	B	A	H	B	A
2_21671	1	31.525	H	H	H	H	H	H	H	A	A	A	H	H	H	H	A	B	H	A	B	A	H	H	H	B	A	B	H	H	B	A	H	B	H	B	A	B	B	B	H	H	H	B	B	A	H	B	A
2_25311	1	31.525	H	H	H	H	H	H	H	A	A	A	H	H	H	H	A	B	H	A	B	A	H	H	H	B	A	B	H	H	B	A	H	B	H	B	A	B	B	B	H	H	H	B	B	A	H	B	A
2_34795	1	31.525	H	-	H	H	H	H	H	A	A	A	H	H	H	H	A	B	H	A	B	A	H	H	H	B	A	B	H	H	B	A	H	B	H	B	A	B	B	B	H	H	H	B	B	A	H	B	A
2_35115	1	31.525	H	H	H	H	H	H	H	A	A	A	H	H	H	H	A	B	H	A	B	A	H	H	H	B	A	B	H	H	B	A	H	B	H	B	A	B	B	B	H	H	H	B	B	A	H	B	A
2_46664	1	31.525	H	H	H	H	H	H	H	A	A	A	H	H	H	H	A	B	H	A	B	A	H	H	H	B	A	B	H	H	B	A	H	B	H	B	A	B	B	B	H	H	H	B	B	A	H	B	A
2_30804	1	31.946	H	H	H	H	H	H	H	A	A	A	H	H	H	H	A	B	H	A	B	A	H	H	H	B	A	B	H	H	B	A	H	B	H	B	A	B	B	B	H	H	H	B	B	A	H	B	A
2_35505	1	31.946	H	H	H	H	H	H	H	A	A	A	H	H	H	H	A	B	H	A	B	A	H	H	H	B	A	B	H	H	B	A	H	B	H	B	A	B	B	B	H	H	H	B	B	A	H	B	A
2_35587	1	31.946	H	H	H	H	H	H	H	A	A	A	H	H	H	H	A	B	H	A	B	A	H	H	H	B	A	B	H	H	B	A	H	B	H	B	A	B	B	B	H	H	H	B	B	A	H	B	A
2_35588	1	31.946	H	H	H	H	H	H	H	A	A	A	H	H	H	H	A	B	H	A	B	A	H	H	H	B	A	B	H	H	B	A	H	B	H	B	A	B	B	B	H	H	H	B	B	A	H	B	A
2_35598	1	31.946	H	H	H	H	H	H	H	A	A	A	H	H	H	H	A	B	H	A	B	A	H	H	H	B	A	B	H	H	B	A	H	B	H	B	A	B	B	B	H	H	H	B	B	A	H	B	A
2_35787	1	31.946	H	H	H	H	H	H	H	A	A	A	H	H	H	H	A	B	H	A	B	A	H	H	H	B	A	B	H	H	B	A	H	B	H	B	A	B	B	B	H	H	H	B	B	A	H	B	A
2_38808	1	31.946	H	-	-	-	-	H	H	A	A	A	H	-	H	H	A	B	H	A	B	A	H	H	H	B	A	B	H	H	B	A	H	B	H	B	A	B	B	B	H	H	H	B	B	A	H	B	A
2_38879	1	31.946	H	H	H	H	H	H	H	A	A	A	H	H	H	H	A	B	H	A	B	A	H	H	H	B	A	B	H	H	B	A	H	B	H	B	A	B	B	B	H	H	H	B	B	A	H	B	A
2_41301	1	31.946	H	H	H	H	H	H	H	A	A	A	H	H	H	H	A	B	H	A	B	A	H	H	H	B	A	B	H	H	B	A	H	B	H	B	A	B	B	B	H	H	H	B	B	A	H	B	A
2_48263	1	31.946	H	H	H	H	H	H	H	A	A	A	H	H	H	H	A	B	H	A	B	A	H	H	H	B	A	B	H	H	B	A	H	B	H	B	A	B	B	B	H	H	H	B	B	A	H	B	A
2_50751	1	31.946	H	H	H	H	H	H	H	A	A	A	H	H	H	H	A	B	H	A	B	A	H	H	H	B	A	B	H	H	B	A	H	B	H	B	A	B	B	B	H	H	H	B	B	A	H	B	A
2_50078	1	32.366	H	H	H	H	H	H	H	A	A	A	H	H	H	H	A	B	H	A	B	A	H	H	H	B	A	B	H	H	B	A	H	B	H	B	A	B	B	B	H	H	H	B	B	A	H	B	A
2_02627	1	32.786	H	H	H	H	H	H	H	A	A	A	H	H	H	H	A	B	H	A	B	A	H	H	H	B	A	B	H	H	B	A	H	B	H	B	A	B	B	B	H	H	H	B	B	A	H	B	A
2_03486	1	32.786	H	H	H	H	H	H	H	A	A	A	H	H	H	H	A	B	H	A	B	A	H	H	H	B	A	B	H	H	B	A	H	B	H	B	A	B	B	B	H	H	H	B	B	A	H	B	A
2_08257	1	32.786	H	H	H	H	H	H	H	A	A	A	H	H	H	H	A	B	H	A	B	A	H	H	H	B	A	B	H	H	B	A	H	B	H	B	A	B	B	B	H	H	H	B	B	A	H	B	A
2_26343	1	32.786	H	H	H	H	H	H	H	A	A	A	H	H	H	H	A	B	H	A	B	A	H	H	H	B	A	B	H	H	B	A	H	B	H	B	A	B	B	B	H	H	H	B	B	A	H	B	A
2_28149	1	32.786	H	H	H	H	H	H	H	A	A	A	H	H	H	H	A	B	H	A	B	A	H	H	H	B	A	B	H	H	B	A	H	B	H	B	A	B	B	B	H	H	H	B	B	A	H	B	A
2_30033	1	32.786	H	H	H	H	H	H	H	A	A	A	H	H	H	H	A	B	H	A	B	A	H	H	H	B	A	B	H	H	B	A	H	B	H	B	A	B	B	B	H	H	H	B	B	A	H	B	A
2_32573	1	32.786	H	H	H	H	H	H	H	A	A	A	H	H	H	H	A	B	H	A	B	A	H	H	H	B	A	B	H	H	B	A	H	B	H	B	A	B	B	B	H	H	H	B	B	A	H	B	A
2_33784	1	32.786	H	H	H	H	H	H	H	A	A	A	H	H	H	H	A	B	H	A	B	A	H	H	H	B	A	B	H	H	B	A	H	B	H	B	A	B	B	B	H	H	H	B	B	A	H	B	A
2_34051	1	32.786	H	H	H	H	H	H	H	A	A	A	H	H	H	H	A	B	H	A	B	A	H	H	H	B	A	B	H	H	B	A	H	B	H	B	A	B	B	B	H	H	H	B	B	A	H	B	A
2_35229	1	32.786	H	H	H	H	H	H	H	A	A	A	H	H	H	H	A	B	H	A	B	A	H	H	H	B	A	B	H	H	B	A	H	B	H	B	A	B	B	B	H	H	H	B	B	A	H	B	A
2_35265	1	32.786	H	H	H	H	H	H	H	A	A	A	H	H	H	H	A	B	H	A	B	A	H	H	H	B	A	B	H	H	B	A	H	B	H	B	A	B	B	B	H	H	H	B	B	A	H	B	A
2_36775	1	32.786	H	H	H	H	H	H	H	A	A	A	H	H	H	H	A	B	H	A	B	A	H	H	H	B	A	B	H	H	B	A	H	B	H	B	A	B	B	B	H	H	H	B	B	A	H	B	A
2_37095	1	32.786	H	H	H	H	H	H	H	A	A	A	H	H	H	H	A	B	H	A	B	A	H	H	H	B	A	B	H	H	B	A	H	B	H	B	A	B	B	B	H	H	H	B	B	A	H	B	A
2_37302	1	32.786	H	H	H	H	H	H	H	A	A	A	H	H	H	H	A	B	H	A	B	A	H	H	H	B	A	B	H	H	B	A	H	B	H	B	A	B	B	B	H	H	H	B	B	A	H	B	A
2_46959	1	32.786	H	H	H	H	H	H	H	A	A	A	H	H	H	H	A	B	H	A	B	A	H	H	H	B	A	B	H	H	B	A	H	B	H	B	A	B	B	B	H	H	H	B	B	A	H	B	A
2_01341	1	34.047	H	H	H	H	H	H	H	A	A	A	H	H	H	H	A	B	H	A	B	H	H	H	H	B	A	B	H	H	B	A	H	B	H	B	A	B	B	B	H	H	H	B	B	A	H	B	A
2_01385	1	34.047	H	H	H	H	H	H	H	A	A	A	H	H	H	H	A	B	H	A	B	H	H	H	H	B	A	B	H	H	B	A	H	B	H	B	A	B	B	B	H	H	H	B	B	A	H	B	A
2_07656	1	34.047	H	-	-	-	-	H	H	A	A	A	H	H	H	H	A	B	H	A	B	H	H	H	H	B	A	B	H	H	B	A	H	B	H	B	A	B	B	B	H	H	H	B	B	A	H	B	A
2_13881	1	34.047	H	H	H	H	H	H	H	A	A	A	H	H	H	H	A	B	H	A	B	H	H	H	H	B	A	B	H	H	B	A	H	B	H	B	A	B	B	B	H	H	H	B	B	A	H	B	A
2_15287	1	34.047	H	H	H	H	H	H	H	A	A	A	H	H	H	H	A	B	H	A	B	H	H	H	H	B	A	B	H	H	B	A	H	B	H	B	A	B	B	B	H	H	H	B	B	A	H	B	A
2_15288	1	34.047	H	H	H	H	H	H	H	A	A	A	H	H	H	H	A	B	H	A	B	H	H	H	H	B	A	B	H	H	B	A	H	B	H	B	A	B	B	B	H	H	H	B	B	A	H	B	A
2_16082	1	34.047	H	H	H	H	H	H	H	A	A	A	H	H	H	H	A	B	H	A	B	H	H	H	H	B	A	B	H	H	B	A	H	B	H	B	A	B	B	B	H	H	H	B	B	A	H	B	A
2_21272	1	34.047	H	H	H	H	H	H	H	A	A	A	H	H	H	H	A	B	H	A	B	H	H	H	H	B	A	B	H	H	B	A	H	B	H	B	A	B	B	B	H	H	H	B	B	A	H	B	A
2_21699	1	34.047	H	H	H	H	H	H	H	A	A	A	H	H	H	H	A	B	H	A	B	H	H	H	H	B	A	B	H	H	B	A	H	B	H	B	A	B	B	B	H	H	H	B	B	A	H	B	A
2_21700	1	34.047	H	H	H	-	-	H	H	A	A	A	H	H	-	H	A	B	H	A	B	H	H	H	H	B	A	B	-	H	B	A	H	B	H	B	A	B	B	B	H	H	H	B	B	A	H	B	A
2_24096	1	34.047	H	H	H	H	H	H	H	A	A	A	H	H	H	H	A	B	H	A	B	H	H	H	H	B	A	B	H	H	B	A	H	B	H	B	A	B	B	B	H	H	H	B	B	A	H	B	A
2_26027	1	34.047	H	H	H	H	H	H	H	A	A	A	H	H	H	H	A	B	H	A	B	H	H	H	H	B	A	B	H	H	B	A	H	B	H	B	A	B	B	B	H	H	H	B	B	A	H	B	A
2_34635	1	34.047	H	H	H	H	H	H	H	A	A	A	H	H	H	H	A	B	H	A	B	H	H	H	H	B	A	B	H	H	B	A	H	B	H	B	A	B	B	B	H	H	H	B	B	A	H	B	A
2_34836	1	34.047	H	H	H	H	H	H	H	A	A	A	H	H	H	H	A	B	H	A	B	H	H	H	H	B	A	B	H	H	B	A	H	B	H	B	A	B	B	B	H	H	H	B	B	A	H	B	A
2_34839	1	34.047	H	H	H	H	H	H	H	A	A	A	H	H	H	H	A	B	H	A	B	H	H	H	H	B	A	B	H	H	B	A	H	B	H	B	A	B	B	B	H	H	H	B	B	A	H	B	A
2_34840	1	34.047	H	H	H	H	H	H	H	A	A	A	H	H	H	H	A	B	H	A	B	H	H	H	H	B	A	B	H	H	-	A	H	B	H	B	A	-	B	-	H	H	H	B	B	A	H	B	A
2_34908	1	34.047	H	H	H	H	H	H	H	A	A	A	H	H	H	H	A	B	H	A	B	H	H	H	H	B	A	B	H	H	B	A	H	B	H	B	A	B	B	B	H	H	H	B	B	A	H	B	A
2_34909	1	34.047	H	H	H	H	H	H	H	A	A	A	H	H	H	H	A	B	H	A	B	H	H	H	H	B	A	B	H	H	B	A	H	B	H	B	A	B	B	B	H	H	H	B	B	A	H	B	A
2_35096	1	34.047	H	H	H	H	H	H	H	A	A	A	H	H	H	H	A	B	H	A	B	H	H	H	H	B	A	B	H	H	B	A	H	B	H	B	A	B	B	B	H	H	H	B	B	A	H	B	A
2_35097	1	34.047	H	H	H	H	H	H	H	A	A	A	H	H	H	H	A	B	H	A	B	H	H	H	H	B	A	B	H	H	B	A	H	B	H	B	A	B	B	B	H	H	H	B	B	A	H	B	A
2_35741	1	34.047	H	H	H	H	H	H	H	A	A	A	H	H	H	H	A	B	H	A	B	H	H	H	H	B	A	B	H	H	B	A	H	B	H	B	A	B	B	B	H	H	H	B	B	A	H	B	A
2_35846	1	34.047	H	H	H	H	H	H	H	A	A	A	H	H	H	H	A	B	H	A	B	H	H	H	H	B	A	B	H	H	B	A	H	B	H	B	A	B	B	B	H	H	H	B	B	A	H	B	A
2_35937	1	34.047	H	H	H	H	H	H	H	A	A	A	H	H	H	H	A	B	H	A	B	H	H	H	H	B	A	B	H	H	B	A	H	B	H	B	A	B	B	B	H	H	H	B	B	A	H	B	A
2_36401	1	34.047	H	H	H	H	H	H	H	A	A	A	H	H	H	H	A	B	H	A	B	H	H	H	H	B	A	B	H	H	B	A	H	B	H	B	A	B	B	B	H	H	H	B	B	A	H	B	A
2_37500	1	34.047	H	H	H	H	H	H	H	A	A	A	H	H	H	H	A	B	H	A	B	H	H	H	H	B	A	B	H	H	B	A	H	B	H	B	A	B	B	B	H	H	H	B	B	A	H	B	A
2_43647	1	34.047	H	H	H	-	-	H	H	A	-	A	H	H	H	H	A	B	H	A	B	H	H	H	H	B	A	B	H	H	B	A	H	B	H	B	A	B	B	B	H	H	H	B	B	A	H	B	A
2_45176	1	34.047	H	H	H	H	H	H	H	A	A	A	H	H	H	H	A	B	H	A	B	H	H	H	H	B	A	B	H	H	B	A	H	B	H	B	A	B	B	B	H	H	H	B	B	A	H	B	A
2_04038	1	34.467	H	H	H	H	H	H	H	A	A	A	H	H	H	H	A	B	H	A	B	H	H	H	H	B	A	B	H	H	B	A	H	B	H	B	A	B	B	B	H	H	H	B	B	A	H	H	A
2_04039	1	34.467	H	H	H	H	H	H	H	A	A	A	H	H	H	H	A	B	H	A	B	H	H	H	H	B	A	B	H	H	B	A	H	B	H	B	A	B	B	B	H	H	H	B	B	A	H	H	A
2_06167	1	34.467	H	H	H	H	H	H	H	A	A	A	H	H	H	H	A	B	H	A	B	H	H	H	H	B	A	B	H	H	B	A	H	B	H	B	A	B	B	B	H	H	H	B	B	A	H	H	A
2_06423	1	34.467	H	H	H	H	H	H	H	A	A	A	H	H	H	H	A	B	H	A	B	H	H	H	H	B	A	B	H	H	B	A	H	B	H	B	A	B	B	B	H	H	H	B	B	A	H	H	A
2_06425	1	34.467	H	H	H	H	H	H	H	A	A	A	H	H	H	H	A	B	H	A	B	H	H	H	H	B	A	B	H	H	B	A	H	B	H	B	A	B	B	B	H	H	H	B	B	A	H	H	A
2_17040	1	34.467	H	H	H	H	H	H	H	A	A	A	H	H	H	H	A	B	H	A	B	H	H	H	H	B	A	B	H	H	B	A	H	B	H	B	A	B	B	B	H	H	H	B	B	A	H	H	A
2_23260	1	34.467	H	H	H	H	H	H	H	A	A	A	H	H	H	H	A	B	H	A	B	H	H	H	H	B	A	B	H	H	B	A	H	B	H	B	A	B	B	B	H	H	H	B	B	A	H	H	A
2_26991	1	34.467	H	H	H	H	H	H	H	A	A	A	H	H	H	H	A	B	H	A	B	H	H	H	H	B	A	B	H	H	B	A	H	B	H	B	A	B	B	B	H	H	H	B	B	A	H	H	A
2_00905	1	34.887	H	H	H	H	H	H	H	A	A	A	H	H	H	H	A	B	H	A	B	H	H	H	H	B	A	B	H	H	B	A	H	B	H	B	A	B	B	B	H	H	H	B	B	A	H	H	A
2_02072	1	34.887	H	H	H	H	H	H	H	A	A	A	H	H	H	H	A	B	H	A	B	H	H	H	H	B	A	B	H	H	B	A	H	B	H	B	A	B	B	B	H	H	H	B	B	A	H	H	A
2_03564	1	34.887	H	H	H	H	H	H	H	A	A	A	H	H	H	H	A	B	H	A	B	H	H	H	H	B	A	B	H	H	B	A	H	B	H	B	A	B	B	B	H	H	H	B	B	A	H	H	A
2_03565	1	34.887	H	H	H	H	H	H	H	A	A	A	H	H	H	H	A	B	H	A	B	H	H	H	H	B	A	B	H	H	B	A	H	B	H	B	A	B	B	B	H	H	H	B	B	A	H	H	A
2_04141	1	34.887	H	H	H	H	H	H	H	A	A	A	H	H	H	H	A	B	H	A	B	H	H	H	H	B	A	B	H	H	B	A	H	B	H	B	A	B	B	B	H	H	H	B	B	A	H	H	A
2_04295	1	34.887	H	H	H	H	H	H	H	A	A	A	H	H	H	H	A	B	H	A	B	H	H	H	H	B	A	B	H	H	B	A	H	B	H	B	A	B	B	B	H	H	H	B	B	A	H	H	A
2_04296	1	34.887	H	H	H	H	H	H	H	A	A	A	H	H	H	H	A	B	H	A	B	H	H	H	H	B	A	B	H	H	B	A	H	B	H	B	A	B	B	B	H	H	H	B	B	A	H	H	A
2_06823	1	34.887	H	H	H	H	H	H	H	A	A	A	H	H	H	H	A	B	H	A	B	H	H	H	H	B	A	B	H	H	B	A	H	B	H	B	A	B	B	B	H	H	H	B	B	A	H	H	A
2_06824	1	34.887	H	H	H	H	H	H	H	A	A	A	H	H	H	H	A	B	H	A	B	H	H	H	H	B	A	B	H	H	B	A	H	B	H	B	A	B	B	B	H	H	H	B	B	A	H	H	A
2_07777	1	34.887	H	H	H	H	H	H	H	A	A	A	H	H	H	H	A	B	H	A	B	H	H	H	H	B	A	B	H	H	B	A	H	B	H	B	A	B	B	B	H	H	H	B	B	A	H	H	A
2_09007	1	34.887	H	H	H	H	H	H	H	A	A	A	H	H	H	H	A	B	H	A	B	H	H	H	H	B	A	B	H	H	B	A	H	B	H	B	A	B	B	B	H	H	H	B	B	A	H	H	A
2_15806	1	34.887	H	H	H	H	H	H	H	A	A	A	H	H	H	H	A	B	H	A	B	H	H	H	H	B	A	B	H	H	B	A	H	B	H	B	A	B	B	B	H	H	H	B	B	A	H	H	A
2_21880	1	34.887	H	H	H	H	H	H	H	A	A	A	H	H	H	H	A	B	H	A	B	H	H	H	H	B	A	B	H	H	B	A	H	B	H	B	A	B	B	B	H	H	H	B	B	A	H	H	A
2_24242	1	34.887	H	H	H	H	H	H	H	A	A	A	H	H	H	H	A	B	H	A	B	H	H	H	H	B	A	B	H	H	B	A	H	B	H	B	A	B	B	B	H	H	H	B	B	A	H	H	A
2_25285	1	34.887	H	H	H	H	H	H	H	A	A	A	H	H	H	H	A	B	H	A	B	H	H	H	H	B	A	B	H	H	B	A	H	B	H	B	A	B	B	B	H	H	H	B	B	A	H	H	A
2_44682	1	34.887	H	H	H	H	H	H	H	A	A	A	H	H	H	H	A	B	H	A	B	H	H	H	H	B	A	B	H	H	B	A	H	B	H	B	A	B	B	B	H	H	H	B	B	A	H	H	A
2_46071	1	34.887	H	H	H	H	H	H	H	A	A	A	H	H	H	H	A	B	H	A	B	H	H	H	H	B	A	B	H	H	B	A	H	B	H	B	A	B	B	B	H	H	H	B	B	A	H	H	A
2_49686	1	34.887	H	H	H	H	H	H	H	A	A	A	H	H	H	H	A	B	H	A	B	H	H	H	H	B	A	B	H	H	B	A	H	B	H	B	A	B	B	B	H	H	H	B	B	A	H	H	A
2_50564	1	34.887	H	H	H	H	H	H	H	A	A	A	H	H	H	H	A	B	H	A	B	H	H	H	H	B	A	B	H	H	B	A	H	B	H	B	A	B	B	B	H	H	H	B	B	A	H	H	A
2_51726	1	34.887	H	H	H	H	H	H	H	A	A	A	H	H	H	H	A	B	H	A	B	H	H	H	H	B	A	B	H	H	B	A	H	B	H	B	A	B	B	B	H	H	H	B	B	A	H	H	A
2_53112	1	34.887	H	H	H	H	H	H	H	A	A	A	H	H	H	H	A	B	H	A	B	H	H	H	H	B	A	B	H	H	B	A	H	B	H	B	A	B	B	B	H	H	H	B	B	A	H	H	A
2_00266	1	35.307	H	H	H	H	H	H	H	A	A	A	H	H	H	H	A	B	H	A	B	H	H	H	H	B	A	B	H	H	B	A	H	B	H	B	A	B	B	B	H	H	H	B	B	A	H	H	A
2_02118	1	35.307	H	H	H	H	H	H	H	A	A	A	H	H	H	H	A	B	H	A	B	H	H	H	H	B	A	B	H	H	B	A	H	B	H	B	A	B	B	B	H	H	H	B	B	A	H	H	A
2_02119	1	35.307	H	H	H	H	H	H	H	A	A	A	H	H	H	H	A	B	H	A	B	H	H	H	H	B	A	B	H	H	B	A	H	B	H	B	A	B	B	B	H	H	H	B	B	A	H	H	A
2_10840	1	35.307	H	H	H	H	H	H	H	A	A	A	H	H	H	H	A	B	H	A	B	H	H	H	H	B	A	B	H	H	B	A	H	B	H	B	A	B	B	B	H	H	H	B	B	A	H	H	A
2_14189	1	35.307	H	H	H	H	H	H	H	A	A	A	H	H	H	H	A	B	H	A	B	H	H	H	H	B	A	B	H	H	B	A	H	B	H	B	A	B	B	B	H	H	H	B	B	A	H	H	A
2_14190	1	35.307	H	H	H	H	H	H	H	A	A	A	H	H	H	H	A	B	H	A	B	H	H	H	H	B	A	B	H	H	B	A	H	B	H	B	A	B	B	B	H	H	H	B	B	A	H	H	A
2_17674	1	35.307	H	H	H	H	H	H	H	A	A	A	H	H	H	H	A	B	H	A	B	H	H	H	H	B	A	B	H	H	B	A	H	B	H	B	A	B	B	B	H	H	H	B	B	A	H	H	A
2_23317	1	35.307	H	H	H	H	H	H	H	A	A	A	H	H	H	H	A	B	H	A	B	H	H	H	H	B	A	B	H	H	B	A	H	B	H	B	A	B	B	B	H	H	H	B	B	A	H	H	A
2_23728	1	35.307	H	H	H	H	-	H	H	A	A	A	H	H	-	H	A	B	H	A	B	-	H	H	H	B	A	B	-	H	B	A	H	B	H	B	A	B	B	B	H	H	H	B	B	A	H	H	A
2_23729	1	35.307	H	H	H	H	H	H	H	A	A	A	H	H	H	H	A	B	H	A	B	H	H	H	H	B	A	B	H	H	B	A	H	B	H	B	A	B	B	B	H	H	H	B	B	A	H	H	A
2_26263	1	35.307	H	H	H	H	H	H	H	A	A	A	H	H	H	H	A	B	H	A	B	H	H	H	H	B	A	B	H	H	B	A	H	B	H	B	A	B	B	B	H	H	H	B	B	A	H	H	A
1_0756	1	35.727	H	H	H	H	H	H	H	A	A	H	H	H	H	H	A	B	H	A	B	H	H	H	H	B	A	B	H	H	B	A	H	B	H	B	A	B	B	B	H	H	H	B	B	A	H	H	A
1_1445	1	35.727	H	H	H	-	-	-	-	A	A	H	H	H	H	H	A	B	H	A	B	-	H	H	H	B	A	B	H	H	B	A	H	B	H	B	A	-	B	B	H	H	H	B	B	A	H	H	A
2_04071	1	35.727	H	H	H	H	H	H	H	A	A	H	H	H	H	H	A	B	H	A	B	H	H	H	H	B	A	B	H	H	B	A	H	B	H	B	A	B	B	B	H	H	H	B	B	A	H	H	A
2_04072	1	35.727	H	H	H	H	H	H	H	A	A	H	H	H	H	H	A	B	H	A	B	H	H	H	H	B	A	B	H	H	B	A	H	B	H	B	A	B	B	B	H	H	H	B	B	A	H	H	A
2_09064	1	35.727	H	H	H	H	H	H	H	A	A	H	H	H	H	H	A	B	H	A	B	H	H	H	H	B	A	B	H	H	B	A	H	B	H	B	A	B	B	B	H	H	H	B	B	A	H	H	A
2_09172	1	35.727	H	H	H	H	H	H	H	A	A	H	H	H	H	H	A	B	H	A	B	H	H	H	H	B	A	B	H	H	B	A	H	B	H	B	A	B	B	B	H	H	H	B	B	A	H	H	A
2_14263	1	35.727	H	H	H	H	H	H	H	A	A	-	H	H	H	H	A	B	H	A	B	H	H	H	H	B	A	B	H	H	B	A	H	B	H	B	A	B	B	B	H	H	H	B	B	A	H	H	A
2_28068	1	35.727	H	H	H	H	H	H	H	A	A	H	H	H	H	H	A	B	H	A	B	H	H	H	H	B	A	B	H	H	B	A	H	B	H	B	A	B	B	B	H	H	H	B	B	A	H	H	A
2_28549	1	35.727	H	H	H	H	H	H	H	A	A	H	H	H	H	H	A	B	H	A	B	H	H	H	H	B	A	B	H	H	B	A	H	B	H	B	A	B	B	B	H	H	H	B	B	A	H	H	A
2_03232	1	36.148	H	H	H	H	H	H	H	A	A	H	H	H	H	H	A	B	H	A	B	H	H	H	H	B	A	B	H	H	B	A	H	B	H	B	A	H	B	B	H	H	H	B	B	A	H	H	A
2_01411	1	36.568	H	H	H	H	H	H	H	A	A	H	H	H	H	H	A	B	H	A	B	H	H	H	H	B	A	B	H	H	B	A	H	B	H	B	A	H	B	B	H	H	H	B	B	A	H	H	A
2_01412	1	36.568	H	H	H	H	H	H	H	A	A	H	H	H	H	H	A	B	H	A	B	H	H	H	H	B	A	B	H	H	B	A	H	B	H	B	A	H	B	B	H	H	H	B	B	A	H	H	A
2_03231	1	36.568	H	H	H	H	H	H	H	A	A	H	H	H	H	H	A	B	H	A	B	H	H	H	H	B	A	B	H	H	B	A	H	B	H	B	A	H	B	B	H	H	H	B	B	A	H	H	A
2_05372	1	36.568	H	H	H	H	H	H	H	A	A	H	H	H	H	H	A	B	H	A	B	H	H	H	H	B	A	B	H	H	B	A	H	B	H	B	A	H	B	B	H	H	H	B	B	A	H	H	A
2_05373	1	36.568	H	H	H	H	H	H	H	A	A	H	H	H	H	H	A	B	H	A	B	H	H	H	H	B	A	B	H	H	B	A	H	B	H	B	A	H	B	B	H	H	H	B	B	A	H	H	A
2_06449	1	36.568	H	H	H	H	H	H	H	A	A	H	H	H	H	H	A	B	H	A	B	H	H	H	H	B	A	B	H	H	B	A	H	B	H	B	A	H	B	B	H	H	H	B	B	A	H	H	A
2_07587	1	36.568	H	H	H	H	H	H	H	A	A	H	H	H	H	H	A	B	H	A	B	H	H	H	H	B	A	B	H	H	B	A	H	B	H	B	A	H	B	B	H	H	H	B	B	A	H	H	A
2_08216	1	36.568	H	H	H	H	H	H	H	A	A	H	H	H	H	H	A	B	H	A	B	H	H	H	H	B	A	B	H	H	B	A	H	B	H	B	A	H	B	B	H	H	H	B	B	A	H	H	A
2_08217	1	36.568	H	H	H	H	H	H	H	A	A	H	H	H	H	H	A	B	H	A	B	H	H	H	H	B	A	B	H	H	B	A	H	B	H	B	A	H	B	B	H	H	H	B	B	A	H	H	A
2_08406	1	36.568	H	H	H	H	H	H	H	A	A	H	H	H	H	H	A	B	H	A	B	H	H	H	H	B	A	B	H	H	B	A	H	B	H	B	A	H	B	B	H	H	H	B	B	A	H	H	A
2_08553	1	36.568	H	H	H	H	H	H	H	A	A	H	H	H	H	H	A	B	H	A	B	H	H	H	H	B	A	B	H	H	B	A	H	B	H	B	A	H	B	B	H	H	H	B	B	A	H	H	A
2_08554	1	36.568	H	H	H	H	H	H	H	A	A	H	H	H	H	H	A	B	H	A	B	H	H	H	H	B	A	B	H	H	B	A	H	B	H	B	A	H	B	B	H	H	H	B	B	A	H	H	A
2_08555	1	36.568	H	H	H	H	H	H	H	A	A	H	H	H	H	H	A	B	H	A	B	H	H	H	H	B	A	B	H	H	B	A	H	B	H	B	A	H	B	B	H	H	H	B	B	A	H	H	A
2_08977	1	36.568	H	H	H	H	H	H	H	A	A	H	H	H	H	H	A	B	H	A	B	H	H	H	H	B	A	B	H	H	B	A	H	B	H	B	A	H	B	B	H	H	H	B	B	A	H	H	A
2_10114	1	36.568	H	H	H	H	H	H	H	A	A	H	H	H	H	H	A	B	H	A	B	H	H	H	H	B	A	B	H	H	B	A	H	B	H	B	A	H	B	B	H	H	H	B	B	A	H	H	A
2_10506	1	36.568	H	H	H	H	H	H	H	A	A	H	H	H	H	H	A	B	H	A	B	H	H	H	H	B	A	B	H	H	B	A	H	B	H	B	A	H	B	B	H	H	H	B	B	A	H	H	A
2_13901	1	36.568	H	H	H	H	H	H	H	A	A	H	H	H	H	H	A	B	H	A	B	H	H	H	H	B	A	B	H	H	B	A	H	B	H	B	A	H	B	B	H	H	H	B	B	A	H	H	A
2_14289	1	36.568	H	H	H	H	H	H	H	A	A	H	H	H	H	H	A	B	H	A	B	H	H	H	H	B	A	B	H	H	B	A	H	B	H	B	A	H	B	B	H	H	H	B	B	A	H	H	A
2_16404	1	36.568	H	H	H	H	H	H	H	A	A	H	H	H	H	H	A	B	H	A	B	H	H	H	H	B	A	B	H	H	B	A	H	B	H	B	A	H	B	B	H	H	H	B	B	A	H	H	A
2_16405	1	36.568	H	H	H	H	H	H	H	A	A	H	H	H	H	H	A	B	H	A	B	H	H	H	H	B	A	B	H	H	B	A	H	B	H	B	A	H	B	B	H	H	H	B	B	A	H	H	A
2_17325	1	36.568	H	H	H	H	H	H	H	A	A	H	H	H	H	H	A	B	H	A	B	H	H	H	H	B	A	B	H	H	B	A	H	B	H	B	A	H	B	B	H	H	H	B	B	A	H	H	A
2_17654	1	36.568	H	H	H	H	H	H	H	A	A	H	H	H	H	H	A	B	H	A	B	H	H	H	H	B	A	B	H	H	B	A	H	B	H	B	A	H	B	B	H	H	H	B	B	A	H	H	A
2_17655	1	36.568	H	H	H	H	H	H	H	A	A	H	H	H	H	H	A	B	H	A	B	H	H	H	H	B	A	B	H	H	B	A	H	B	H	B	A	H	B	B	H	H	H	B	B	A	H	H	A
2_18140	1	36.568	H	H	H	H	H	H	H	A	A	H	H	H	H	H	A	B	H	A	B	H	H	H	H	B	A	B	H	H	B	A	H	B	H	B	A	H	B	B	H	H	H	B	B	A	H	H	A
2_20342	1	36.568	H	H	H	H	H	H	H	A	A	H	H	H	H	H	A	B	H	A	B	H	H	H	H	B	A	B	H	H	B	A	H	B	H	B	A	H	B	B	H	H	H	B	B	A	H	H	A
2_20795	1	36.568	H	H	H	H	H	H	H	A	A	H	H	H	H	H	A	B	H	A	B	H	H	H	H	B	A	B	H	H	B	A	H	B	H	B	A	H	B	B	H	H	H	B	B	A	H	H	A
2_20796	1	36.568	H	H	H	H	H	H	H	A	A	H	H	H	H	H	A	B	H	A	B	H	H	H	H	B	A	B	H	H	B	A	H	B	H	B	A	H	B	B	H	H	H	B	B	A	H	H	A
2_21544	1	36.568	H	H	H	H	H	H	H	A	A	H	H	H	H	H	A	B	H	A	B	H	H	H	H	B	A	B	H	H	B	A	H	B	H	B	A	H	B	B	H	H	H	B	B	A	H	H	A
2_29421	1	36.568	H	H	H	H	H	H	H	A	A	H	H	H	H	H	A	B	H	A	B	H	H	H	H	B	A	B	H	H	B	A	H	B	H	B	A	H	B	B	H	H	H	B	B	A	H	H	A
2_29422	1	36.568	H	H	H	H	H	H	H	A	A	H	H	H	H	H	A	B	H	A	B	H	H	H	H	B	A	B	H	H	B	A	H	B	H	B	A	H	B	B	H	H	H	B	B	A	H	H	A
2_30077	1	36.568	H	H	H	H	H	H	H	A	A	H	H	H	H	H	A	B	H	A	B	H	H	H	H	B	A	B	H	H	B	A	H	B	H	B	A	H	B	B	H	H	H	B	B	A	H	H	A
2_31192	1	36.568	H	H	H	H	H	H	H	A	A	H	H	H	H	H	A	B	H	A	B	H	H	H	H	B	A	B	H	H	B	A	H	B	H	B	A	H	B	B	H	H	H	B	B	A	H	H	A
2_32292	1	36.568	H	H	H	H	H	H	H	A	A	H	H	H	H	H	A	B	H	A	B	H	H	H	H	B	A	B	H	H	B	A	H	B	H	B	A	H	B	B	H	H	H	B	B	A	H	H	A
2_45956	1	36.568	H	H	H	H	H	H	H	A	A	H	H	H	H	H	A	B	H	A	B	H	H	H	H	B	A	B	H	H	B	A	H	B	H	B	A	H	B	B	H	H	H	B	B	A	H	H	A
2_47717	1	36.568	H	H	H	H	H	H	H	A	A	H	H	H	H	H	A	B	H	A	B	H	H	H	H	B	A	B	H	H	B	A	H	B	H	B	A	H	B	B	H	H	H	B	B	A	H	H	A
2_50139	1	36.568	H	H	H	H	H	H	H	A	A	H	H	H	H	H	A	B	H	A	B	H	H	H	H	B	A	B	H	H	B	A	H	B	H	B	A	H	B	B	H	H	H	B	B	A	H	H	A
2_50687	1	36.568	H	H	H	H	H	H	H	A	A	H	H	H	H	H	A	B	H	A	B	H	H	H	H	B	A	B	H	H	B	A	H	B	H	B	A	H	B	B	H	H	H	B	B	A	H	H	A
2_54623	1	36.568	H	H	H	H	H	H	H	A	A	H	H	H	H	H	A	B	H	A	B	H	H	H	H	B	A	B	H	H	B	A	H	B	H	B	A	H	B	B	H	H	H	B	B	A	H	H	A
2_55339	1	36.568	H	H	H	H	H	H	H	A	A	H	H	H	H	H	A	B	H	A	B	H	H	H	H	B	A	B	H	H	B	A	H	B	H	B	A	H	B	B	H	H	H	B	B	A	H	H	A
2_00220	1	36.988	H	H	H	H	H	H	H	A	A	H	H	H	H	H	A	B	H	A	B	H	H	H	H	B	A	B	H	H	B	A	H	B	H	B	A	H	B	B	H	H	H	B	B	A	H	H	A
2_02050	1	36.988	H	H	H	H	H	H	H	A	A	H	H	H	H	H	A	B	H	A	B	H	H	H	H	B	A	B	H	H	B	A	H	B	H	B	A	H	B	B	H	H	H	B	B	A	H	H	A
2_04035	1	36.988	H	H	H	H	H	H	H	A	A	H	H	H	H	H	A	B	H	A	B	H	H	H	H	B	A	B	H	H	B	A	H	B	H	B	A	H	B	B	H	H	H	B	B	A	H	H	A
2_06518	1	36.988	H	H	H	H	H	H	H	A	A	H	H	H	H	H	A	B	H	A	B	H	H	H	H	B	A	B	H	H	B	A	H	B	H	B	A	H	B	B	H	H	H	B	B	A	H	H	A
2_06519	1	36.988	H	H	H	H	H	H	H	A	A	H	H	H	H	H	A	B	H	A	B	H	H	H	H	B	A	B	H	H	B	A	H	B	H	B	A	H	B	B	H	H	H	B	B	A	H	H	A
2_07103	1	36.988	H	H	H	H	H	H	H	A	A	H	H	H	H	H	A	B	H	A	B	H	H	H	H	B	A	B	H	H	B	A	H	B	H	B	A	H	B	B	H	H	H	B	B	A	H	H	A
2_08370	1	36.988	H	H	H	H	H	H	H	A	A	H	H	H	H	H	A	B	H	A	B	H	H	H	H	B	A	B	H	H	B	A	H	B	H	B	A	H	B	B	H	H	H	B	B	A	H	H	A
2_12092	1	36.988	H	H	H	H	H	H	H	A	A	H	H	H	H	H	A	B	H	A	B	H	H	H	H	B	A	B	H	H	B	A	H	B	H	B	A	H	B	B	H	H	H	B	B	A	H	H	A
2_12546	1	36.988	H	H	H	H	H	H	H	A	A	H	H	H	H	H	A	B	H	A	B	H	H	H	H	B	A	B	H	H	B	A	H	B	H	B	A	H	B	B	H	H	H	B	B	A	H	H	A
2_12547	1	36.988	H	H	H	H	H	H	H	A	A	H	H	H	H	H	A	B	H	A	B	H	H	H	H	B	A	B	H	H	B	A	H	B	H	B	A	H	B	B	H	H	H	B	B	A	H	H	A
2_14138	1	36.988	H	H	H	H	H	H	H	A	A	H	H	H	H	H	A	B	H	A	B	H	H	H	H	B	A	B	H	H	B	A	H	B	H	B	A	H	B	B	H	H	H	B	B	A	H	H	A
2_18904	1	36.988	H	H	H	H	H	H	H	A	A	H	H	H	H	H	A	B	H	A	B	H	H	H	H	B	A	B	H	H	B	A	H	B	H	B	A	H	B	B	H	H	H	B	B	A	H	H	A
2_19075	1	36.988	H	H	H	H	H	H	H	A	A	H	H	H	H	H	A	B	H	A	B	H	H	H	H	B	A	B	H	H	B	A	H	B	H	B	A	H	B	B	H	H	H	B	B	A	H	H	A
2_19154	1	36.988	H	H	H	H	H	H	H	A	A	H	H	H	H	H	A	B	H	A	B	H	H	H	H	B	A	B	H	H	B	A	H	B	H	B	A	H	B	B	H	H	H	B	B	A	H	H	A
2_30814	1	36.988	H	H	H	H	H	H	H	A	A	H	H	H	H	H	A	B	H	A	B	H	H	H	H	B	A	B	H	H	B	A	H	B	H	B	A	H	B	B	H	H	H	B	B	A	H	H	A
2_33346	1	36.988	H	H	H	H	H	H	H	A	A	H	H	H	H	H	A	B	H	A	B	H	H	H	H	B	A	B	H	H	B	A	H	B	H	B	A	H	B	B	H	H	H	B	B	A	H	H	A
2_39955	1	36.988	H	H	H	H	H	H	H	A	A	H	H	H	H	H	A	B	H	A	B	H	H	H	H	B	A	B	H	H	B	A	H	B	H	B	A	H	B	B	H	H	H	B	B	A	H	H	A
2_51288	1	36.988	H	H	H	H	H	H	H	A	A	H	H	H	H	H	A	B	H	A	B	H	H	H	H	B	A	B	H	H	B	A	H	B	H	B	A	H	B	B	H	H	H	B	B	A	H	H	A
2_04876	1	37.408	H	H	H	H	H	H	H	A	A	H	H	H	H	H	A	B	H	A	B	H	H	H	H	B	A	B	H	H	B	A	H	B	H	B	A	H	B	B	H	H	H	B	B	A	H	H	A
2_18647	1	37.408	H	H	H	H	H	H	H	A	A	H	H	H	H	H	A	B	H	A	B	H	H	H	H	B	A	B	H	H	B	A	H	B	H	B	A	H	B	B	H	H	H	B	B	A	H	H	A
2_29023	1	37.408	H	H	H	H	H	H	H	A	A	H	H	H	H	H	A	B	H	A	B	H	H	H	H	B	A	B	H	H	B	A	H	B	H	B	A	H	B	B	H	H	H	B	B	A	H	H	A
2_36782	1	37.408	H	H	H	H	H	H	H	A	A	H	H	H	H	H	A	B	H	A	B	H	H	H	H	B	A	B	H	H	B	A	H	B	H	B	A	H	B	B	H	H	H	B	B	A	H	H	A
2_12209	1	37.828	H	H	H	H	H	H	H	A	A	H	H	H	H	H	A	B	H	A	B	H	H	H	H	B	A	B	H	H	B	A	H	B	H	B	A	H	B	B	H	H	A	B	B	A	H	H	A
2_16798	1	37.828	H	H	H	H	H	H	H	A	A	H	H	H	H	H	A	B	H	A	B	H	H	H	H	B	A	B	H	H	B	A	H	B	H	B	A	H	B	B	H	H	A	B	B	A	H	H	A
2_20920	1	37.828	H	H	H	H	H	H	H	A	A	H	H	H	H	H	A	B	H	A	B	H	H	H	H	B	A	B	H	H	B	A	H	B	H	B	A	H	B	B	H	H	A	B	B	A	H	H	A
2_22388	1	37.828	H	H	H	H	H	H	H	A	A	H	H	H	H	H	A	B	H	A	B	H	H	H	H	B	A	B	H	H	B	A	H	B	H	B	A	H	B	B	H	H	A	B	B	A	H	H	A
2_19840	1	38.669	H	H	H	H	H	H	H	A	A	B	H	H	H	H	A	B	H	A	B	H	H	H	H	B	A	B	H	H	B	A	H	B	H	B	A	H	B	B	H	H	A	B	B	A	H	H	A
2_22781	1	38.669	H	H	H	H	H	H	H	A	A	B	H	H	H	H	A	B	H	A	B	H	H	H	H	B	A	B	H	H	B	A	H	B	H	B	A	H	B	B	H	H	A	B	B	A	H	H	A
2_24100	1	38.669	H	H	H	H	H	H	H	A	A	B	H	H	H	H	A	B	H	A	B	H	H	H	H	B	A	B	H	H	B	A	H	B	H	B	A	H	B	B	H	H	A	B	B	A	H	H	A
2_34346	1	38.669	H	H	H	H	H	H	H	A	A	B	H	H	H	H	A	B	H	A	B	H	H	H	H	B	A	B	H	H	B	A	H	B	H	B	A	H	B	B	H	H	A	B	B	A	H	H	A
2_45864	1	38.669	H	H	H	H	H	H	H	A	A	B	H	H	H	H	A	B	H	A	B	H	H	H	H	B	A	B	H	H	B	A	H	B	H	B	A	H	B	B	H	H	A	B	B	A	H	H	A
2_46987	1	38.669	H	H	H	H	H	H	H	A	A	B	H	H	H	H	A	B	H	A	B	H	H	H	H	B	A	B	H	H	B	A	H	B	H	B	A	H	B	B	H	H	A	B	B	A	H	H	A
2_31630	1	39.089	A	H	H	H	H	H	H	A	A	B	H	H	H	H	A	B	H	A	B	H	H	H	H	B	A	B	H	H	B	A	H	B	H	B	A	H	B	B	H	H	A	B	B	A	H	H	A
2_14774	1	39.929	A	H	H	H	H	H	H	A	A	B	H	H	H	H	A	B	H	A	B	H	H	H	H	B	A	B	H	H	B	A	H	B	H	B	A	H	B	B	H	H	A	B	B	A	H	H	A
2_00415	1	40.349	A	H	H	H	H	H	H	A	A	B	H	H	H	H	A	B	H	A	B	H	H	H	H	B	A	B	H	H	B	A	H	B	H	B	A	H	B	B	H	H	A	B	B	A	H	H	A
2_00416	1	40.349	A	H	H	H	H	H	H	A	A	B	H	H	H	H	A	B	H	A	B	H	H	H	H	B	A	B	H	H	B	A	H	B	H	B	A	H	B	B	H	H	A	B	B	A	H	H	A
2_05933	1	40.349	A	H	H	H	H	H	H	A	A	B	H	H	H	H	A	B	H	A	B	H	H	H	H	B	A	B	H	H	B	A	H	B	H	B	A	H	B	B	H	H	A	B	B	A	H	H	A
2_05934	1	40.349	A	H	H	H	H	H	H	A	A	B	H	H	H	H	A	B	H	A	B	H	H	H	H	B	A	B	H	H	B	A	H	B	H	B	A	H	B	B	H	H	A	B	B	A	H	H	A
2_07436	1	40.349	A	H	H	H	H	H	H	A	A	B	H	H	H	H	A	B	H	A	B	H	H	H	H	B	A	B	H	H	B	A	H	B	H	B	A	H	B	B	H	H	A	B	B	A	H	H	A
2_11963	1	40.349	A	H	H	H	H	H	H	A	A	B	H	H	H	H	A	B	H	A	B	H	H	H	H	B	A	B	H	H	B	A	H	B	H	B	A	H	B	B	H	H	A	B	B	A	H	H	A
2_12363	1	40.349	A	H	H	H	H	H	H	A	A	B	H	H	H	H	A	B	H	A	B	H	H	H	H	B	A	B	H	H	B	A	H	B	H	B	A	H	B	B	H	H	A	B	B	A	H	H	A
2_14775	1	40.349	A	H	H	H	H	H	H	A	A	B	H	H	H	H	A	B	H	A	B	H	H	H	H	B	A	B	H	H	B	A	H	B	H	B	A	H	B	B	H	H	A	B	B	A	H	H	A
2_24007	1	40.349	A	H	H	H	H	H	H	A	A	B	H	H	H	H	A	B	H	A	B	H	H	H	H	B	A	B	H	H	B	A	H	B	H	B	A	H	B	B	H	H	A	B	B	A	H	H	A
2_24008	1	40.349	A	H	H	H	H	H	H	A	A	B	H	H	H	H	A	B	H	A	B	H	H	H	H	B	A	B	H	H	B	A	H	B	H	B	A	H	B	B	H	H	A	B	B	A	H	H	A
2_27058	1	40.349	A	H	H	H	H	H	H	A	A	B	H	H	H	H	A	B	H	A	B	H	H	H	H	B	A	B	H	H	B	A	H	B	H	B	A	H	B	B	H	H	A	B	B	A	H	H	A
2_31435	1	40.349	A	H	H	H	H	H	H	A	A	B	H	H	H	H	A	B	H	A	B	H	H	H	H	B	A	B	H	H	B	A	H	B	H	B	A	H	B	B	H	H	A	B	B	A	H	H	A
2_31436	1	40.349	A	H	H	H	H	H	H	A	A	B	H	H	H	H	A	B	H	A	B	H	H	H	H	B	A	B	H	H	B	A	H	B	H	B	A	H	B	B	H	H	A	B	B	A	H	H	A
2_40121	1	40.349	A	H	H	H	H	H	H	A	A	B	H	H	H	H	A	B	H	A	B	H	H	H	H	B	A	B	H	H	B	A	H	B	H	B	A	H	B	B	H	H	A	B	B	A	H	H	A
2_43235	1	40.349	A	H	H	H	H	H	H	A	A	B	H	H	H	H	A	B	H	A	B	H	H	H	H	B	A	B	H	H	B	A	H	B	H	B	A	H	B	B	H	H	A	B	B	A	H	H	A
2_44763	1	40.349	A	H	H	H	H	H	H	A	A	B	H	H	H	H	A	B	H	A	B	H	H	H	H	B	A	B	H	H	B	A	H	B	H	B	A	H	B	B	H	H	A	B	B	A	H	H	A
2_48497	1	40.349	A	H	H	H	H	H	H	A	A	B	H	H	H	H	A	B	H	A	B	H	H	H	H	B	A	B	H	H	B	A	H	B	H	B	A	H	B	B	H	H	A	B	B	A	H	H	A
2_52401	1	40.349	A	H	H	H	H	H	H	A	A	B	H	H	H	H	A	B	H	A	B	H	H	H	H	B	A	B	H	H	B	A	H	B	H	B	A	H	B	B	H	H	A	B	B	A	H	H	A
2_52156	1	40.77	A	-	-	-	-	-	H	-	H	B	H	H	H	H	A	B	H	A	B	H	H	H	H	B	A	B	H	H	B	A	H	B	H	B	A	H	B	B	H	H	A	B	B	A	H	H	A
2_12731	1	41.19	A	H	H	H	H	H	H	A	A	B	H	H	H	H	A	B	H	A	B	H	H	H	H	B	A	B	H	H	B	A	H	B	H	B	A	H	B	B	H	H	A	B	B	A	H	H	A
2_12732	1	41.19	A	H	H	H	H	H	H	A	A	B	H	H	H	H	A	B	H	A	B	H	H	H	H	B	A	B	H	H	B	A	H	B	H	B	A	H	B	B	H	H	A	B	B	A	H	H	A
2_12931	1	41.19	A	H	H	H	H	H	H	A	A	B	H	H	H	H	A	B	H	A	B	H	H	H	H	B	A	B	H	H	B	A	H	B	H	B	A	H	B	B	H	H	A	B	B	A	H	H	A
2_13808	1	41.19	A	H	H	H	H	H	H	A	A	B	H	H	H	H	A	B	H	A	B	H	H	H	H	B	A	B	H	H	B	A	H	B	H	B	A	H	B	B	H	H	A	B	B	A	H	H	A
2_13809	1	41.19	A	H	H	H	H	H	H	A	A	B	H	H	H	H	A	B	H	A	B	H	H	H	H	B	A	B	H	H	B	A	H	B	H	B	A	H	B	B	H	H	A	B	B	A	H	H	A
2_15313	1	41.19	A	H	H	H	H	H	H	A	A	B	H	H	H	H	A	B	H	A	B	H	H	H	H	B	A	B	H	H	B	A	H	B	H	B	A	H	B	B	H	H	A	B	B	A	H	H	A
2_15314	1	41.19	A	H	H	H	H	H	H	A	A	B	H	H	H	H	A	B	H	A	B	H	H	H	H	B	A	B	H	H	B	A	H	B	H	B	A	H	B	B	H	H	A	B	B	A	H	H	A
2_22207	1	41.19	A	H	H	H	H	H	H	A	A	B	H	H	H	H	A	B	H	A	B	H	H	H	H	B	A	B	H	H	B	A	H	B	H	B	A	H	B	B	H	H	A	B	B	A	H	H	A
2_28072	1	41.19	A	H	H	H	H	H	H	A	A	B	H	H	H	H	A	B	H	A	B	H	H	H	H	B	A	B	H	H	B	A	H	B	H	B	A	H	B	B	H	H	A	B	B	A	H	H	A
2_29942	1	41.19	A	H	H	H	H	H	H	A	A	B	H	H	H	H	A	B	H	A	B	H	H	H	H	B	A	B	H	H	B	A	H	B	H	B	A	H	B	B	H	H	A	B	B	A	H	H	A
2_34582	1	41.19	A	H	H	H	H	H	H	A	A	B	H	H	H	H	A	B	H	A	B	H	H	H	H	B	A	B	H	H	B	A	H	B	H	B	A	H	B	B	H	H	A	B	B	A	H	H	A
2_16066	1	41.61	A	H	H	H	H	H	H	A	A	B	H	H	H	H	A	B	H	A	B	H	H	H	H	B	A	B	H	H	H	A	H	B	H	B	A	H	B	B	H	H	A	B	B	A	H	H	A
2_16067	1	41.61	A	H	H	H	H	H	H	A	A	B	H	H	H	H	A	B	H	A	B	H	H	H	H	B	A	B	H	H	H	A	H	B	H	B	A	H	B	B	H	H	A	B	B	A	H	H	A
2_17832	1	41.61	A	H	H	H	H	H	H	A	A	B	H	H	H	H	A	B	H	A	B	H	H	H	H	B	A	B	H	H	H	A	H	B	H	B	A	H	B	B	H	H	A	B	B	A	H	H	A
2_18402	1	41.61	A	H	H	H	H	H	H	A	A	B	H	H	H	H	A	B	H	A	B	H	H	H	H	B	A	B	H	H	H	A	H	B	H	B	A	H	B	B	H	H	A	B	B	A	H	H	A
2_21186	1	41.61	A	H	H	H	H	H	H	A	A	B	H	H	H	H	A	B	H	A	B	H	H	H	H	B	A	B	H	H	H	A	H	B	H	B	A	H	B	B	H	H	A	B	B	A	H	H	A
2_21605	1	41.61	A	H	H	H	H	H	H	A	A	B	H	H	H	H	A	B	H	A	B	H	H	H	H	B	A	B	H	H	H	A	H	B	H	B	A	H	B	B	H	H	A	B	B	A	H	H	A
2_21606	1	41.61	A	H	H	-	-	H	H	A	A	B	H	H	-	-	A	B	H	A	B	-	H	H	H	B	A	B	-	-	H	A	H	B	H	-	A	H	B	B	H	H	A	B	B	A	H	H	A
2_23001	1	41.61	A	H	H	H	H	H	H	A	A	B	H	H	H	H	A	B	H	A	B	H	H	H	H	B	A	B	H	H	H	A	H	B	H	B	A	H	B	B	H	H	A	B	B	A	H	H	A
2_26118	1	41.61	A	H	H	H	H	H	H	A	A	B	H	H	H	H	A	B	H	A	B	H	H	H	H	B	A	B	H	H	H	A	H	B	H	B	A	H	B	B	H	H	A	B	B	A	H	H	A
2_26119	1	41.61	A	H	H	H	H	H	H	A	A	B	H	H	H	H	A	B	H	A	B	H	H	H	H	B	A	B	H	H	H	A	H	B	H	B	A	H	B	B	H	H	A	B	B	A	H	H	A
2_28643	1	41.61	A	H	H	H	H	H	H	A	A	B	H	H	H	H	A	B	H	A	B	H	H	H	H	B	A	B	H	H	H	A	H	B	H	B	A	H	B	B	H	H	A	B	B	A	H	H	A
2_29298	1	41.61	A	H	H	H	H	H	H	A	A	B	H	H	H	H	A	B	H	A	B	H	H	H	H	B	A	B	H	H	H	A	H	B	H	B	A	H	B	B	H	H	A	B	B	A	H	H	A
2_30213	1	41.61	A	H	H	H	H	H	H	A	A	B	H	H	H	H	A	B	H	A	B	H	H	H	H	B	A	B	H	H	H	A	H	B	H	B	A	H	B	B	H	H	A	B	B	A	H	H	A
2_30586	1	41.61	A	H	H	H	H	H	H	A	A	B	H	H	H	H	A	B	H	A	B	H	H	H	H	B	A	B	H	H	H	A	H	B	H	B	A	H	B	B	H	H	A	B	B	A	H	H	A
2_32877	1	41.61	A	H	H	H	H	H	H	A	A	B	H	H	H	H	A	B	H	A	B	H	H	H	H	B	A	B	H	H	H	A	H	B	H	B	A	H	B	B	H	H	A	B	B	A	H	H	A
2_42871	1	41.61	A	H	H	H	H	H	H	A	A	B	H	H	H	H	A	B	H	A	B	H	H	H	H	B	A	B	H	H	H	A	H	B	H	B	A	H	B	B	H	H	A	B	B	A	H	H	A
2_44700	1	41.61	-	H	H	H	H	H	H	A	A	B	H	H	H	H	A	B	H	-	B	H	H	H	H	B	A	B	H	H	H	A	H	B	H	B	A	H	B	B	H	H	A	B	B	A	H	H	A
2_48947	1	41.61	A	H	H	H	H	H	H	A	A	B	H	H	H	H	A	B	H	A	B	H	H	H	H	B	A	B	H	H	H	A	H	B	H	B	A	H	B	B	H	H	A	B	B	A	H	H	A
1_0027	1	42.03	A	H	H	H	H	H	H	A	A	B	H	H	H	H	A	B	H	A	B	H	H	H	H	B	A	B	H	H	H	A	H	B	H	B	A	H	B	H	H	H	A	B	B	A	H	H	A
1_0153	1	42.03	A	H	H	H	H	H	H	A	A	B	H	H	H	H	A	B	H	A	B	H	H	H	H	B	A	B	H	H	H	A	H	B	H	B	A	H	B	H	H	H	A	B	B	A	H	H	A
2_00098	1	42.03	A	H	H	H	H	H	H	A	A	B	H	H	H	H	A	B	H	A	B	H	H	H	H	B	A	B	H	H	H	A	H	B	H	B	A	H	B	H	H	H	A	B	B	A	H	H	A
2_05716	1	42.03	A	H	H	H	H	H	H	A	A	B	H	H	H	H	A	B	H	A	B	H	H	H	H	B	A	B	H	H	H	A	H	B	H	B	A	H	B	H	H	H	A	B	B	A	H	H	A
2_05717	1	42.03	A	H	H	H	H	H	H	A	A	B	H	H	H	H	A	B	H	A	B	H	H	H	H	B	A	B	H	H	H	A	H	B	H	B	A	H	B	H	H	H	A	B	B	A	H	H	A
2_11172	1	42.03	A	H	H	H	H	H	H	A	A	B	H	H	H	H	A	B	H	A	B	H	H	H	H	B	A	B	H	H	H	A	H	B	H	B	A	H	B	H	H	H	A	B	B	A	H	H	A
2_16073	1	42.03	A	H	H	H	H	H	H	A	A	B	H	H	H	H	A	B	H	A	B	H	H	H	H	B	A	B	H	H	H	A	H	B	H	B	A	H	B	H	H	H	A	B	B	A	H	H	A
2_16074	1	42.03	A	H	H	H	H	H	H	A	A	B	H	H	H	H	A	B	H	A	B	H	H	H	H	B	A	B	H	H	H	A	H	B	H	B	A	H	B	H	H	H	A	B	B	A	H	H	A
2_17641	1	42.03	A	H	H	H	H	H	H	A	A	B	H	H	H	H	A	B	H	A	B	H	H	H	H	B	A	B	H	H	H	A	H	B	H	B	A	H	B	H	H	H	A	B	B	A	H	H	A
2_22887	1	42.03	A	H	H	H	H	H	H	A	A	B	H	H	H	H	A	B	H	A	B	H	H	H	H	B	A	B	H	H	H	A	H	B	H	B	A	H	B	H	H	H	A	B	B	A	H	H	A
2_22888	1	42.03	A	H	H	H	H	H	H	A	A	B	H	H	H	H	A	B	H	A	B	H	H	H	H	B	A	B	H	H	H	A	H	B	H	B	A	H	B	H	H	H	A	B	B	A	H	H	A
2_23120	1	42.03	A	H	H	H	H	H	H	A	A	B	H	H	H	H	A	B	H	A	B	H	H	H	H	B	A	B	H	H	H	A	H	B	H	B	A	H	B	H	H	H	A	B	B	A	H	H	A
2_26340	1	42.03	A	H	H	H	H	H	H	A	A	B	H	H	H	H	A	B	H	A	B	H	H	H	H	B	A	B	H	H	H	A	H	B	H	B	A	H	B	H	H	H	A	B	B	A	H	H	A
2_28760	1	42.03	A	H	H	H	H	H	H	A	A	B	H	H	H	H	A	B	H	A	B	H	H	H	H	B	A	B	H	H	H	A	H	B	H	B	A	H	B	H	H	H	A	B	B	A	H	H	A
2_28761	1	42.03	A	H	H	H	H	H	H	A	A	B	H	H	H	H	A	B	H	A	B	H	H	H	H	B	A	B	H	H	H	A	H	B	H	B	A	H	B	H	H	H	A	B	B	A	H	H	A
2_30544	1	42.03	A	H	H	H	H	H	H	A	A	B	H	H	H	H	A	B	H	A	B	H	H	H	H	B	A	B	H	H	H	A	H	B	H	B	A	H	B	H	H	H	A	B	B	A	H	H	A
2_31845	1	42.03	A	H	H	H	H	H	H	A	A	B	H	H	H	H	A	B	H	A	B	H	H	H	H	B	A	B	H	H	H	A	H	B	H	B	A	H	B	H	H	H	A	B	B	A	H	H	A
2_33854	1	42.03	A	H	H	H	H	H	H	A	A	B	H	H	H	H	A	B	H	A	B	H	H	H	H	B	A	B	H	H	H	A	H	B	H	B	A	H	B	H	H	H	A	B	B	A	H	H	A
2_34721	1	42.03	A	H	H	H	H	H	H	A	A	B	H	H	H	H	A	B	H	A	B	H	H	H	H	B	A	B	H	H	H	A	H	B	H	B	A	H	B	H	H	H	A	B	B	A	H	H	A
2_39160	1	42.03	A	H	H	H	H	H	H	A	A	B	H	H	H	H	A	B	H	A	B	H	H	H	H	B	A	B	H	H	H	A	H	B	H	B	A	H	B	H	H	H	A	B	B	A	H	H	A
2_41763	1	42.03	A	H	H	H	H	H	H	A	A	B	H	H	H	H	A	B	H	A	B	H	H	H	H	B	A	B	H	H	H	A	H	B	H	B	A	H	B	H	H	H	A	B	B	A	H	H	A
2_04402	1	42.45	A	H	H	H	H	H	H	A	A	B	H	H	H	H	A	B	H	A	B	H	H	H	H	B	A	B	H	H	H	A	H	B	H	B	A	H	B	H	H	H	A	B	B	A	H	H	A
2_08178	1	42.45	A	H	H	H	H	H	H	A	A	B	H	H	H	H	A	B	H	A	B	H	H	H	H	B	A	B	H	H	H	A	H	B	H	B	A	H	B	H	H	H	A	B	B	A	H	H	A
2_11735	1	42.45	A	H	H	H	H	H	H	A	A	B	H	H	H	H	A	B	H	A	B	H	H	H	H	B	A	B	H	H	H	A	H	B	H	B	A	H	B	H	H	H	A	B	B	A	H	H	A
2_22874	1	42.45	A	H	H	H	H	H	H	A	A	B	H	H	H	H	A	B	H	A	B	H	H	H	H	B	A	B	H	H	H	A	H	B	H	B	A	H	B	H	H	H	A	B	B	A	H	H	A
2_26341	1	42.45	A	H	H	H	H	H	H	A	A	B	H	H	H	H	A	B	H	A	B	H	H	H	H	B	A	B	H	H	H	A	H	B	H	B	A	H	B	H	H	H	A	B	B	A	H	H	A
2_27758	1	42.45	A	H	H	H	H	H	H	A	A	B	H	H	H	H	A	B	H	A	B	H	H	H	H	B	A	B	H	H	H	A	H	B	H	B	A	H	B	H	H	H	A	B	B	A	H	H	A
2_28916	1	42.45	A	H	H	H	H	H	H	A	A	B	H	H	H	H	A	B	H	A	B	H	H	H	H	B	A	B	H	H	H	A	H	B	H	B	A	H	B	H	H	H	A	B	B	A	H	H	A
2_28976	1	42.45	A	H	H	H	H	H	H	A	A	B	H	H	H	H	A	B	H	A	B	H	H	H	H	B	A	B	H	H	H	A	H	B	H	B	A	H	B	H	H	H	A	B	B	A	H	H	A
2_43015	1	42.45	A	H	H	H	H	H	H	A	A	B	H	H	H	H	A	B	H	A	B	H	H	H	H	B	A	B	H	H	H	A	H	B	H	B	A	H	B	H	H	H	A	B	B	A	H	H	A
2_46519	1	42.45	A	H	H	H	H	H	H	A	A	B	H	H	H	H	A	B	H	A	B	H	H	H	H	B	A	B	H	H	H	A	H	B	H	B	A	H	B	H	H	H	A	B	B	A	H	H	A
2_49892	1	42.45	A	H	H	H	H	H	H	A	A	B	H	H	H	H	A	B	H	A	B	H	H	H	H	B	A	B	H	H	H	A	H	B	H	B	A	H	B	H	H	H	A	B	B	A	H	H	A
2_03825	1	42.87	A	H	H	H	H	H	H	A	A	B	H	H	H	H	A	B	H	A	B	H	H	H	H	B	A	B	H	H	H	A	H	B	H	B	A	H	H	H	H	H	A	B	B	A	H	H	A
2_16440	1	42.87	A	H	H	H	H	H	H	A	A	B	H	H	H	H	A	B	H	A	B	H	H	H	H	B	A	B	H	H	H	A	H	B	H	B	A	H	H	H	H	H	A	B	B	A	H	H	A
2_16441	1	42.87	A	H	H	H	H	H	H	A	A	B	H	H	H	H	A	B	H	A	B	H	H	H	H	B	A	B	H	H	H	A	H	B	H	B	A	H	H	H	H	H	A	B	B	A	H	H	A
2_26831	1	42.87	A	H	H	H	H	H	H	A	A	B	H	H	H	H	A	B	H	A	B	H	H	H	H	B	A	B	H	H	H	A	H	B	H	B	A	H	H	H	H	H	A	B	B	A	H	H	A
2_30284	1	42.87	A	H	H	H	H	H	H	A	A	B	H	H	H	H	A	B	H	A	B	H	H	H	H	B	A	B	H	H	H	A	H	B	H	B	A	H	H	H	H	H	A	B	B	A	H	H	A
2_03922	1	43.291	A	H	H	H	H	H	H	A	A	B	H	H	H	H	A	B	H	A	B	H	H	H	H	B	A	B	H	H	H	A	H	B	B	B	A	H	H	H	H	H	A	B	B	A	H	H	A
2_07819	1	43.291	A	H	H	H	H	H	H	A	A	B	H	H	H	H	A	B	H	A	B	H	H	H	H	B	A	B	H	H	H	A	H	B	B	B	A	H	H	H	H	H	A	B	B	A	H	H	A
2_15659	1	43.291	A	H	H	H	H	H	H	A	A	B	H	H	H	H	A	B	H	A	B	H	H	H	H	B	A	B	H	H	H	A	H	B	B	B	A	H	H	H	H	H	A	B	B	A	H	H	A
2_20413	1	43.291	A	H	H	H	H	H	H	A	A	B	H	H	H	H	A	B	H	A	B	H	H	H	H	B	A	B	H	H	H	A	H	B	B	B	A	H	H	H	H	H	A	B	B	A	H	H	A
2_31108	1	43.291	A	H	H	H	H	H	H	A	A	B	H	H	H	H	A	B	H	A	B	H	H	H	H	B	A	B	H	H	H	A	H	B	B	B	A	H	H	H	H	H	A	B	B	A	H	H	A
2_32593	1	43.291	A	H	H	H	H	H	H	A	A	B	H	H	H	H	A	B	H	A	B	H	H	H	H	B	A	B	H	H	H	A	H	B	B	B	A	H	H	H	H	H	A	B	B	A	H	H	A
2_33835	1	43.291	A	H	H	H	H	H	H	A	A	B	H	H	H	H	A	B	H	A	B	H	H	H	H	B	A	B	H	H	H	A	H	B	B	B	A	H	H	H	H	H	A	B	B	A	H	H	A
2_42648	1	43.291	A	H	H	H	H	H	H	A	A	B	H	H	H	H	A	B	H	A	B	H	H	H	H	B	A	B	H	H	H	A	H	B	B	B	A	H	H	H	H	H	A	B	B	A	H	H	A
2_43257	1	43.291	A	H	H	H	H	H	H	A	A	B	H	H	H	H	A	B	H	A	B	H	H	H	H	B	A	B	H	H	H	A	H	B	B	B	A	H	H	H	H	H	A	B	B	A	H	H	A
2_32406	1	44.131	A	-	-	-	-	H	H	A	H	B	H	H	H	H	A	B	H	H	B	H	H	H	H	B	A	B	H	H	H	A	H	B	B	B	A	H	H	H	H	H	A	B	B	A	H	H	A
2_13788	1	44.551	A	H	H	H	H	H	H	A	A	B	H	H	H	H	A	B	H	H	B	H	H	H	H	B	A	B	H	H	H	A	H	B	B	B	A	H	H	H	H	H	A	B	B	A	H	H	A
2_15684	1	44.551	A	H	H	H	H	H	H	A	A	B	H	H	H	H	A	B	H	H	B	H	H	H	H	B	A	B	H	H	H	A	H	B	B	B	A	H	H	H	H	H	A	B	B	A	H	H	A
2_15685	1	44.551	A	H	H	H	H	H	H	A	A	B	H	H	H	H	A	B	H	H	B	H	H	H	H	B	A	B	H	H	H	A	H	B	B	B	A	H	H	H	H	H	A	B	B	A	H	H	A
2_20296	1	44.551	A	H	H	H	H	H	H	A	A	B	H	H	H	H	A	B	H	H	B	H	H	H	H	B	A	B	H	H	H	A	H	B	B	B	A	H	H	H	H	H	A	B	B	A	H	H	A
2_20297	1	44.551	A	H	H	H	H	H	H	A	A	B	H	H	H	H	A	B	H	H	B	H	H	H	H	B	A	B	H	H	H	A	H	B	B	B	A	H	H	H	H	H	A	B	B	A	H	H	A
2_29544	1	44.551	A	H	H	H	H	H	H	A	A	B	H	H	H	H	A	B	H	H	B	H	H	H	H	B	A	B	H	H	H	A	H	B	B	B	A	H	H	H	H	H	A	B	B	A	H	H	A
2_33112	1	44.551	A	H	H	H	H	H	H	A	A	B	H	H	H	H	A	B	H	H	B	H	H	H	H	B	A	B	H	H	H	A	H	B	B	B	A	H	H	H	H	H	A	B	B	A	H	H	A
2_34422	1	44.551	A	H	H	H	H	H	H	A	A	B	H	H	H	H	A	B	H	H	B	H	H	H	H	B	A	B	H	H	H	A	H	B	B	B	A	H	H	H	H	H	A	B	B	A	H	H	A
2_34423	1	44.551	A	H	H	H	H	H	H	A	A	B	H	H	H	H	A	B	H	H	B	H	H	H	H	B	A	B	H	H	H	A	H	B	B	B	A	H	H	H	H	H	A	B	B	A	H	H	A
2_54121	1	44.551	A	H	H	H	H	H	H	A	A	B	H	H	H	H	A	B	H	H	B	H	H	H	H	B	A	B	H	H	H	A	H	B	B	B	A	H	H	H	H	H	A	B	B	A	H	H	A
2_28373	1	44.971	A	H	H	H	H	H	H	A	A	B	H	H	H	H	A	B	H	H	B	H	H	H	H	B	A	B	H	H	H	H	H	B	B	B	A	H	H	H	H	H	A	B	B	A	H	H	A
2_32411	1	45.812	A	-	-	-	H	H	H	A	H	B	H	H	H	H	A	B	H	H	B	H	H	H	H	B	A	B	H	H	H	H	H	B	B	B	A	H	H	H	H	H	A	B	B	A	H	H	A
1_0535	1	46.232	A	H	H	H	H	H	H	A	A	B	H	H	H	H	A	B	H	H	B	H	H	H	H	B	A	B	H	H	H	H	H	B	B	B	A	H	H	H	H	H	A	B	B	A	H	H	A
2_00774	1	46.232	A	H	H	H	H	H	H	A	A	B	H	H	H	H	A	B	H	H	B	H	H	H	H	B	A	B	H	H	H	H	H	B	B	B	A	H	H	H	H	H	A	B	B	A	H	H	A
2_01011	1	46.232	A	H	H	H	H	H	H	A	A	B	H	H	H	H	A	B	H	H	B	H	H	H	H	B	A	B	H	H	H	H	H	B	B	B	A	H	H	H	H	H	A	B	B	A	H	H	A
2_01012	1	46.232	A	H	H	H	H	H	H	A	A	B	H	H	H	H	A	B	H	H	B	H	H	H	H	B	A	B	H	H	H	H	H	B	B	B	A	H	H	H	H	H	A	B	B	A	H	H	A
2_02585	1	46.232	A	H	H	H	H	H	H	A	A	B	H	H	H	H	A	B	H	H	B	H	H	H	H	B	A	B	H	H	H	H	H	B	B	B	A	H	H	H	H	H	A	B	B	A	H	H	A
2_04778	1	46.232	A	H	H	H	H	H	H	A	A	B	H	H	H	H	A	B	H	H	B	H	H	H	H	B	A	B	H	H	H	H	H	B	B	B	A	H	H	H	H	H	A	B	B	A	H	H	A
2_05045	1	46.232	A	H	H	H	H	H	H	A	A	B	H	H	H	H	A	B	H	H	B	H	H	H	H	B	A	B	H	H	H	H	H	B	B	B	A	H	H	H	H	H	A	B	B	A	H	H	A
2_05461	1	46.232	A	H	H	H	H	H	H	A	A	B	H	H	H	H	A	B	H	H	B	H	H	H	H	B	A	B	H	H	H	H	H	B	B	B	A	H	H	H	H	H	A	B	B	A	H	H	A
2_07524	1	46.232	A	H	H	H	H	H	H	A	A	B	H	H	H	H	A	B	H	H	B	H	H	H	H	B	A	B	H	H	H	H	H	B	B	B	A	H	H	H	H	H	A	B	B	A	H	H	A
2_07525	1	46.232	A	H	H	H	H	H	H	A	A	B	H	H	H	H	A	B	H	H	B	H	H	H	H	B	A	B	H	H	H	H	H	B	B	B	A	H	H	H	H	H	A	B	B	A	H	H	A
2_07950	1	46.232	A	H	H	H	H	H	H	A	A	B	H	H	H	H	A	B	H	H	B	H	H	H	H	B	A	B	H	H	H	H	H	B	B	B	A	H	H	H	H	H	A	B	B	A	H	H	A
2_11374	1	46.232	A	H	H	H	H	H	H	A	A	B	H	H	H	H	A	B	H	H	B	H	H	H	H	B	A	B	H	H	H	H	H	B	B	B	A	H	H	H	H	H	A	B	B	A	H	H	A
2_11933	1	46.232	A	H	H	H	H	H	H	A	A	B	H	H	H	H	A	B	H	H	B	H	H	H	H	B	A	B	H	H	H	H	H	B	B	B	A	H	H	H	H	H	A	B	B	A	H	H	A
2_12173	1	46.232	A	H	H	H	H	H	H	A	A	B	H	H	H	H	A	B	H	H	B	H	H	H	H	B	A	B	H	H	H	H	H	B	B	B	A	H	H	H	H	H	A	B	B	A	H	H	A
2_12340	1	46.232	A	H	H	H	H	H	H	A	A	B	H	H	H	H	A	B	H	H	B	H	H	H	H	B	A	B	H	H	H	H	H	B	B	B	A	H	H	H	H	H	A	B	B	A	H	H	A
2_13604	1	46.232	A	H	H	H	H	H	H	A	A	B	H	H	H	H	A	B	H	H	B	H	H	H	H	B	A	B	H	H	H	H	H	B	B	B	A	H	H	H	H	H	A	B	B	A	H	H	A
2_14420	1	46.232	A	H	H	H	H	H	H	A	A	B	H	H	H	H	A	B	H	H	B	H	H	H	H	B	A	B	H	H	H	H	H	B	B	B	A	H	H	H	H	H	A	B	B	A	H	H	A
2_14680	1	46.232	A	H	H	H	H	H	H	A	A	B	H	H	H	H	A	B	H	H	B	H	H	H	H	B	A	B	H	H	H	H	H	B	B	B	A	H	H	H	H	H	A	B	B	A	H	H	A
2_18446	1	46.232	A	H	H	H	H	H	H	A	A	B	H	H	H	H	A	B	H	H	B	H	H	H	H	B	A	B	H	H	H	H	H	B	B	B	A	H	H	H	H	H	A	B	B	A	H	H	A
2_19379	1	46.232	A	H	H	H	H	H	H	A	A	B	H	H	H	H	A	B	H	H	B	H	H	H	H	B	A	B	H	H	H	H	H	B	B	B	A	H	H	H	H	H	A	B	B	A	H	H	A
2_22218	1	46.232	A	H	H	H	H	H	H	A	A	B	H	H	H	H	A	B	H	H	B	H	H	H	H	B	A	B	H	H	H	H	H	B	B	B	A	H	H	H	H	H	A	B	B	A	H	H	A
2_22219	1	46.232	A	H	H	H	H	H	H	A	A	B	H	H	H	H	A	B	H	H	B	H	H	H	H	B	A	B	H	H	H	H	H	B	B	B	A	H	H	H	H	H	A	B	B	A	H	H	A
2_24757	1	46.232	A	H	H	H	H	H	H	A	A	B	H	H	H	H	A	B	H	H	B	H	H	H	H	B	A	B	H	H	H	H	H	B	B	B	A	H	H	H	H	H	A	B	B	A	H	H	A
2_26498	1	46.232	A	H	H	H	H	H	H	A	A	B	H	H	H	H	A	B	H	H	B	H	H	H	H	B	A	B	H	H	H	H	H	B	B	B	A	H	H	H	H	H	A	B	B	A	H	H	A
2_26606	1	46.232	A	H	H	H	H	H	H	A	A	B	H	H	H	H	A	B	H	H	B	H	H	H	H	B	A	B	H	H	H	H	H	B	B	B	A	H	H	H	H	H	A	B	B	A	H	H	A
2_27505	1	46.232	A	H	H	H	H	H	H	A	A	B	H	H	H	H	A	B	H	H	B	H	H	H	H	B	A	B	H	H	H	H	H	B	B	B	A	H	H	H	H	H	A	B	B	A	H	H	A
2_27687	1	46.232	A	H	H	H	H	H	H	A	A	B	H	H	H	H	A	B	H	H	B	H	H	H	H	B	A	B	H	H	H	H	H	B	B	B	A	H	H	H	H	H	A	B	B	A	H	H	A
2_28815	1	46.232	A	H	H	H	H	H	H	A	A	B	H	H	H	H	A	B	H	H	B	H	H	H	H	B	A	B	H	H	H	H	H	B	B	B	A	H	H	H	H	H	A	B	B	A	H	H	A
2_28819	1	46.232	A	H	H	H	H	H	H	A	A	B	H	H	H	H	A	B	H	H	B	H	H	H	H	B	A	B	H	H	H	H	H	B	B	B	A	H	H	H	H	H	A	B	B	A	H	H	A
2_29059	1	46.232	A	H	H	H	H	H	H	A	A	B	H	H	H	H	A	B	H	H	B	H	H	H	H	B	A	B	H	H	H	H	H	B	B	B	A	H	H	H	H	H	A	B	B	A	H	H	A
2_29107	1	46.232	A	H	H	H	H	H	H	A	A	B	H	H	H	H	A	B	H	H	B	H	H	H	H	B	A	B	H	H	H	H	H	B	B	B	A	H	H	H	H	H	A	B	B	A	H	H	A
2_29534	1	46.232	A	H	H	H	H	H	H	A	A	B	H	H	H	H	A	B	H	H	B	H	H	H	H	B	A	B	H	H	H	H	H	B	B	B	A	H	H	H	H	H	A	B	B	A	H	H	A
2_29822	1	46.232	A	H	H	H	H	H	H	A	A	B	H	H	H	H	A	B	H	H	B	H	H	H	H	B	A	B	H	H	H	H	H	B	B	B	A	H	H	H	H	H	A	B	B	A	H	H	A
2_29823	1	46.232	A	-	-	-	-	H	H	A	-	B	H	H	H	H	A	B	H	H	B	H	H	H	H	B	A	B	H	H	H	H	H	B	B	B	A	H	H	H	H	H	A	B	B	A	H	H	A
2_30019	1	46.232	A	H	H	H	H	H	H	A	A	B	H	H	H	H	A	B	H	H	B	H	H	H	H	B	A	B	H	H	H	H	H	B	B	B	A	H	H	H	H	H	A	B	B	A	H	H	A
2_30020	1	46.232	A	H	H	-	-	H	H	A	A	B	H	H	-	-	A	B	H	H	B	-	-	H	H	B	A	B	-	H	H	H	H	B	B	-	A	H	H	H	H	H	A	B	B	A	H	H	A
2_30127	1	46.232	A	H	H	H	H	H	H	A	A	B	H	H	H	H	A	B	H	H	B	H	H	H	H	B	A	B	H	H	H	H	H	B	B	B	A	H	H	H	H	H	A	B	B	A	H	H	A
2_30759	1	46.232	A	H	H	H	H	H	H	A	A	B	H	H	H	H	A	B	H	H	B	H	H	H	H	B	A	B	H	H	H	H	H	B	B	B	A	H	H	H	H	H	A	B	B	A	H	H	A
2_31099	1	46.232	A	H	H	H	H	H	H	A	A	B	H	H	H	H	A	B	H	H	B	H	H	H	H	B	A	B	H	H	H	H	H	B	B	B	A	H	H	H	H	H	A	B	B	A	H	H	A
2_31575	1	46.232	A	H	H	H	H	H	H	A	A	B	H	H	H	H	A	B	H	H	B	H	H	H	H	B	A	B	H	H	H	H	H	B	B	B	A	H	H	H	H	H	A	B	B	A	H	H	A
2_32146	1	46.232	A	H	H	H	H	H	H	A	A	B	H	H	H	H	A	B	H	H	B	H	H	H	H	B	A	B	H	H	H	H	H	B	B	B	A	H	H	H	H	H	A	B	B	A	H	H	A
2_33502	1	46.232	A	H	H	H	H	H	H	A	A	B	H	H	H	H	A	B	H	H	B	H	H	H	H	B	A	B	H	H	H	H	H	B	B	B	A	H	H	H	H	H	A	B	B	A	H	H	A
2_34396	1	46.232	A	H	H	H	H	H	H	A	A	B	H	H	H	H	A	B	H	H	B	H	H	H	H	B	A	B	H	H	H	H	H	B	B	B	A	H	H	H	H	H	A	B	B	A	H	H	A
2_39748	1	46.232	A	H	H	H	H	H	H	A	A	B	H	H	H	H	A	B	H	H	B	H	H	H	H	B	A	B	H	H	H	H	H	B	B	B	A	H	H	H	H	H	A	B	B	A	H	H	A
2_42186	1	46.232	A	H	H	H	H	H	H	A	A	B	H	H	H	H	A	B	H	H	B	H	H	H	H	B	A	B	H	H	H	H	H	B	B	B	A	H	H	H	H	H	A	B	B	A	H	H	A
2_44774	1	46.232	A	H	H	H	H	H	H	A	A	B	H	H	H	H	A	B	H	H	B	H	H	H	H	B	A	B	H	H	H	H	H	B	B	B	A	H	H	H	H	H	A	B	B	A	H	H	A
2_49815	1	46.232	A	H	H	H	H	H	H	A	A	B	H	H	H	H	A	B	H	H	B	H	H	H	H	B	A	B	H	H	H	H	H	B	B	B	A	H	H	H	H	H	A	B	B	A	H	H	A
2_52320	1	46.232	A	H	H	H	H	H	H	A	A	B	H	H	H	H	A	B	H	H	B	H	H	H	H	B	A	B	H	H	H	H	H	B	B	B	A	H	H	H	H	H	A	B	B	A	H	H	A
2_53544	1	46.232	A	H	H	H	H	H	H	A	A	B	H	H	H	H	A	B	H	H	B	H	H	H	H	B	A	B	H	H	H	H	H	B	B	B	A	H	H	H	H	H	A	B	B	A	H	H	A
2_15178	1	46.652	A	H	H	H	H	H	H	A	A	B	H	H	H	H	A	B	H	H	B	H	H	H	H	B	A	H	H	H	H	H	H	B	B	B	A	H	H	H	H	H	A	B	B	A	H	H	A
2_15179	1	46.652	A	H	H	H	H	H	H	A	A	B	H	H	H	H	A	B	H	H	B	H	H	H	H	B	A	H	H	H	H	H	H	B	B	B	A	H	H	H	H	H	A	B	B	A	H	H	A
2_15862	1	46.652	A	-	-	-	-	H	H	A	A	B	H	H	H	H	A	B	H	H	B	H	H	H	H	B	A	H	H	H	H	H	H	B	B	B	A	H	H	H	H	H	A	B	B	A	H	H	A
2_15863	1	46.652	A	H	H	H	H	H	H	A	A	B	H	H	H	H	A	B	H	H	B	H	H	H	H	B	A	H	H	H	H	H	H	B	B	B	A	H	H	H	H	H	A	B	B	A	H	H	A
2_19390	1	46.652	A	H	H	H	H	H	H	A	A	B	H	H	H	H	A	B	H	H	B	H	H	H	H	B	A	H	H	H	H	H	H	B	B	B	A	H	H	H	H	H	A	B	B	A	H	H	A
2_54154	1	46.652	A	H	H	H	H	H	H	A	A	B	H	H	H	H	A	B	H	H	B	H	H	H	H	B	A	H	H	H	H	H	H	B	B	B	A	H	H	H	H	H	A	B	B	A	H	H	A
2_54868	1	47.493	A	H	H	H	H	H	H	A	A	B	H	H	H	H	A	B	H	H	B	H	H	H	H	B	A	H	H	H	H	H	H	B	B	H	A	H	H	H	H	H	H	B	B	A	H	H	A
1_1092	1	47.913	A	H	H	H	H	H	H	A	A	B	H	H	H	H	A	B	H	H	B	H	H	H	H	B	A	H	H	H	H	H	H	B	B	H	A	H	H	H	H	H	A	B	B	A	H	H	A
2_05867	1	47.913	A	H	H	H	H	H	H	A	A	B	H	H	H	H	A	B	H	H	B	H	H	H	H	B	A	H	H	H	H	H	H	B	B	H	A	H	H	H	H	H	A	B	B	A	H	H	A
2_05868	1	47.913	A	H	H	H	H	H	H	A	A	B	H	H	H	H	A	B	H	H	B	H	H	H	H	B	A	H	H	H	H	H	H	B	B	H	A	H	H	H	H	H	A	B	B	A	H	H	A
2_12285	1	47.913	A	H	H	H	H	H	H	A	A	B	H	H	H	H	A	B	H	H	B	H	H	H	H	B	A	H	H	H	H	H	H	B	B	H	A	H	H	H	H	H	A	B	B	A	H	H	A
2_12719	1	47.913	A	H	H	H	H	H	H	A	A	B	H	H	H	H	A	B	H	H	B	H	H	H	H	B	A	H	H	H	H	H	H	B	B	H	A	H	H	H	H	H	A	B	B	A	H	H	A
2_15058	1	47.913	A	H	H	H	H	H	H	A	A	B	H	H	H	H	A	B	H	H	B	H	H	H	H	B	A	H	H	H	H	H	H	B	B	H	A	H	H	H	H	H	A	B	B	A	H	H	A
2_15059	1	47.913	A	H	H	H	H	H	H	A	A	B	H	H	H	H	A	B	H	H	B	H	H	H	H	B	A	H	H	H	H	H	H	B	B	H	A	H	H	H	H	H	A	B	B	A	H	H	A
2_16952	1	47.913	A	H	H	H	H	H	H	A	A	B	H	H	H	H	A	B	H	H	B	H	H	H	H	B	A	H	H	H	H	H	H	B	B	H	A	H	H	H	H	H	A	B	B	A	H	H	A
2_30384	1	47.913	A	H	H	H	H	H	H	A	A	B	H	H	H	H	A	B	H	H	B	H	H	H	H	B	A	H	H	H	H	H	H	B	B	H	A	H	H	H	H	H	A	B	B	A	H	H	A
2_34169	1	47.913	A	H	H	H	H	H	H	A	A	B	H	H	H	H	A	B	H	H	B	H	H	H	H	B	A	H	H	H	H	H	H	B	B	H	A	H	H	H	H	H	A	B	B	A	H	H	A
2_34256	1	47.913	A	H	H	H	H	H	H	A	A	B	H	H	H	H	A	B	H	H	B	H	H	H	H	B	A	H	H	H	H	H	H	B	B	H	A	H	H	H	H	H	A	B	B	A	H	H	A
2_38969	1	47.913	A	H	H	H	H	H	H	A	-	B	H	H	H	H	A	B	H	H	B	H	H	H	H	B	A	H	H	H	H	H	H	B	B	H	A	H	H	H	H	H	A	B	B	A	H	H	A
2_39720	1	47.913	A	H	-	H	-	H	H	A	A	B	H	H	H	H	A	B	-	H	B	H	H	H	H	B	A	H	H	H	H	H	H	B	B	H	A	H	H	H	H	H	A	B	B	A	H	H	A
2_50595	1	47.913	A	H	H	H	H	H	H	A	A	B	H	H	H	H	A	B	H	H	B	H	H	H	H	B	A	H	H	H	H	H	H	B	B	H	A	H	H	H	H	H	A	B	B	A	H	H	A
2_54730	1	47.913	A	H	H	H	H	H	H	A	A	B	H	H	H	H	A	B	H	H	B	H	H	H	H	B	A	H	H	H	H	H	H	B	B	H	A	H	H	H	H	H	A	B	B	A	H	H	A
2_00498	1	48.333	A	H	H	H	H	H	H	A	A	B	H	H	H	H	A	B	H	H	B	H	H	H	H	B	A	H	H	H	H	H	H	B	B	H	A	H	H	H	H	H	A	B	B	A	H	H	A
2_01525	1	48.333	A	H	H	H	H	H	H	A	A	B	H	H	H	H	A	B	H	H	B	H	H	H	H	B	A	H	H	H	H	H	H	B	B	H	A	H	H	H	H	H	A	B	B	A	H	H	A
2_12248	1	48.333	A	H	H	H	H	H	H	A	A	B	H	H	H	H	A	B	H	H	B	H	H	H	H	B	A	H	H	H	H	H	H	B	B	H	A	H	H	H	H	H	A	B	B	A	H	H	A
2_12249	1	48.333	A	H	H	H	H	H	H	A	A	B	H	H	H	H	A	B	H	H	B	H	H	H	H	B	A	H	H	H	H	H	H	B	B	H	A	H	H	H	H	H	A	B	B	A	H	H	A
2_28723	1	48.333	A	-	-	-	-	H	H	A	A	B	H	H	H	H	A	B	H	H	B	H	H	H	H	B	A	H	H	H	H	H	H	B	B	H	A	H	H	H	H	H	A	B	B	A	H	H	A
2_31221	1	48.333	A	H	H	H	H	H	H	A	A	B	H	H	H	H	A	B	H	H	B	H	H	H	H	B	A	H	H	H	H	H	H	B	B	H	A	H	H	H	H	H	A	B	B	A	H	H	A
2_31222	1	48.333	A	H	H	H	H	H	H	A	A	B	H	H	H	H	A	B	H	H	B	H	H	H	H	B	A	H	H	H	H	H	H	B	B	H	A	H	H	H	H	H	A	B	B	A	H	H	A
2_42366	1	48.333	A	H	H	H	H	H	H	A	A	B	H	H	H	H	A	B	H	H	B	H	H	H	H	B	A	H	H	H	H	H	H	B	B	H	A	H	H	H	H	H	A	B	B	A	H	H	A
2_47656	1	48.333	A	H	H	H	H	H	H	A	A	B	H	H	H	H	A	B	H	H	B	H	H	H	H	B	A	H	H	H	H	H	H	B	B	H	A	H	H	H	H	H	A	B	B	A	H	H	A
2_03371	1	48.753	A	H	H	H	H	H	H	A	A	B	H	H	H	H	A	B	H	H	B	H	H	H	H	B	A	H	H	H	H	H	H	B	B	H	A	H	H	H	H	H	A	B	B	A	H	H	A
2_03372	1	48.753	A	H	H	H	H	H	H	A	A	B	H	H	H	H	A	B	H	H	B	H	H	H	H	B	A	H	H	H	H	H	H	B	B	H	A	H	H	H	H	H	A	B	B	A	H	H	A
2_18813	1	48.753	A	H	H	H	H	H	H	A	A	B	H	H	H	H	A	B	H	H	B	H	H	H	H	B	A	H	H	H	H	H	H	B	B	H	A	H	H	H	H	H	A	B	B	A	H	H	A
2_18914	1	48.753	A	H	H	H	H	H	H	A	A	B	H	H	H	H	A	B	H	H	B	H	H	H	H	B	A	H	H	H	H	H	H	B	B	H	A	H	H	H	H	H	A	B	B	A	H	H	A
2_25895	1	48.753	A	H	H	H	H	H	H	A	A	B	H	H	H	H	A	B	H	H	B	H	H	H	H	B	A	H	H	H	H	H	H	B	B	H	A	H	H	H	H	H	A	B	B	A	H	H	A
2_25896	1	48.753	A	H	H	H	H	H	H	A	A	B	H	H	H	H	A	B	H	H	B	H	H	H	H	B	A	H	H	H	H	H	H	B	B	H	A	H	H	H	H	H	A	B	B	A	H	H	A
2_43625	1	48.753	A	H	H	H	H	H	H	A	A	B	H	H	H	H	A	B	H	H	B	H	H	H	H	B	A	H	H	H	H	H	H	B	B	H	A	H	H	H	H	H	A	B	B	A	H	H	A
2_47976	1	48.753	A	H	H	H	H	H	H	A	A	B	H	H	H	H	A	B	H	H	B	H	H	H	H	B	A	H	H	H	H	H	H	B	B	H	A	H	H	H	H	H	A	B	B	A	H	H	A
2_51680	1	48.753	A	H	H	H	H	H	H	A	A	B	H	H	H	H	A	B	H	H	B	H	H	H	H	B	A	H	H	H	H	H	H	B	B	H	A	H	H	H	H	H	A	B	B	A	H	H	A
1_0826	1	49.173	A	H	H	H	H	H	H	A	A	B	H	H	H	H	A	B	H	H	B	H	B	H	H	B	A	H	H	H	H	H	H	B	B	H	A	H	H	H	H	H	A	B	B	A	H	H	A
1_0874	1	49.173	A	H	H	H	H	H	H	A	A	B	H	H	H	H	A	B	H	H	B	H	B	H	H	B	A	H	H	H	H	H	H	B	B	H	A	H	H	H	H	H	A	B	B	A	H	H	A
2_00560	1	49.173	A	H	H	H	H	H	H	A	A	B	H	H	H	H	A	B	H	H	B	H	B	H	H	B	A	H	H	H	H	H	H	B	B	H	A	H	H	H	H	H	A	B	B	A	H	H	A
2_00561	1	49.173	A	H	H	H	H	H	H	A	A	B	H	H	H	H	A	B	H	H	B	H	B	H	H	B	A	H	H	H	H	H	H	B	B	H	A	H	H	H	H	H	A	B	B	A	H	H	A
2_01988	1	49.173	A	H	H	H	H	H	H	A	A	B	H	H	H	H	A	B	H	H	B	H	B	H	H	B	A	H	H	H	H	H	H	B	B	H	A	H	H	H	H	H	A	B	B	A	H	H	A
2_01989	1	49.173	A	H	H	H	H	H	H	A	A	B	H	H	H	H	A	B	H	H	B	H	B	H	H	B	A	H	H	H	H	H	H	B	B	H	A	H	H	H	H	H	A	B	B	A	H	H	A
2_08731	1	49.173	A	H	H	H	H	H	H	A	A	B	H	H	H	H	A	B	H	H	B	H	B	H	H	B	A	H	H	H	H	H	H	B	B	H	A	H	H	H	H	H	A	B	B	A	H	H	A
2_18415	1	49.173	A	H	H	H	H	H	H	A	A	B	H	H	H	H	A	B	H	H	B	H	B	H	H	B	A	H	H	H	H	H	H	B	B	H	A	H	H	H	H	H	A	B	B	A	H	H	A
2_24673	1	49.173	A	H	H	H	H	H	H	A	A	B	H	H	H	H	A	B	H	H	B	H	B	H	H	B	A	H	H	H	H	H	H	B	B	H	A	H	H	H	H	H	A	B	B	A	H	H	A
2_29967	1	49.173	A	H	H	H	H	H	H	A	A	B	H	H	H	H	A	B	H	H	B	H	B	H	H	B	A	H	H	H	H	H	H	B	B	H	A	H	H	H	H	H	A	B	B	A	H	H	A
2_31883	1	49.173	A	H	H	H	H	H	H	A	A	B	H	H	H	H	A	B	H	H	B	H	B	H	H	B	A	H	H	H	H	H	H	B	B	H	A	H	H	H	H	H	A	B	B	A	H	H	A
2_31884	1	49.173	A	H	H	H	H	H	H	A	A	B	H	H	H	H	A	B	H	H	B	H	B	H	H	B	A	H	H	H	H	H	H	B	B	H	A	H	H	H	H	H	A	B	B	A	H	H	A
2_39459	1	49.173	A	H	H	H	H	H	H	A	A	B	H	H	H	H	A	B	H	H	B	H	B	H	H	B	A	H	H	H	H	H	H	B	B	H	A	H	H	H	H	H	A	B	B	A	H	H	A
1_0692	1	49.594	A	H	H	H	H	H	H	A	A	B	H	H	H	H	A	B	H	H	B	H	B	H	H	B	A	H	H	H	H	H	H	B	B	H	A	H	H	H	H	H	A	B	B	A	H	H	A
2_03124	1	49.594	A	H	H	H	H	H	H	A	A	B	H	H	H	H	A	B	H	H	B	H	B	H	H	B	A	H	H	H	H	H	H	B	B	H	A	H	H	H	H	H	A	B	B	A	H	H	A
2_03125	1	49.594	A	H	H	H	H	H	H	A	A	B	H	H	H	H	A	B	H	H	B	H	B	H	H	B	A	H	H	H	H	H	H	B	B	H	A	H	H	H	H	H	A	B	B	A	H	H	A
2_19957	1	49.594	A	H	H	H	H	H	H	A	A	B	H	H	H	H	A	B	H	H	B	H	B	H	H	B	A	H	H	H	H	H	H	B	B	H	A	H	H	H	H	H	A	B	B	A	H	H	A
2_24009	1	49.594	A	H	H	H	H	H	H	A	A	B	H	H	H	H	A	B	H	H	B	H	B	H	H	B	A	H	H	H	H	H	H	B	B	H	A	H	H	H	H	H	A	B	B	A	H	H	A
2_24010	1	49.594	A	H	H	H	H	H	H	A	A	B	H	H	H	H	A	B	H	H	B	H	B	H	H	B	A	H	H	H	H	H	H	B	B	H	A	H	H	H	H	H	A	B	B	A	H	H	A
2_44094	1	49.594	A	H	H	H	H	H	H	A	A	B	H	H	H	H	A	B	H	H	B	H	B	H	H	B	A	H	H	H	H	H	H	B	B	H	A	H	H	H	H	H	A	B	B	A	H	H	A
1_0403	1	50.014	A	H	-	-	H	H	H	A	A	B	H	H	H	H	A	B	H	H	B	H	B	H	H	B	A	H	H	H	H	H	H	B	B	H	A	H	H	H	H	H	A	B	B	A	H	H	A
2_03648	1	50.014	A	H	H	H	H	H	H	A	A	B	H	H	H	H	A	B	H	H	B	H	B	H	H	B	A	H	H	H	H	H	H	B	B	H	A	H	H	H	H	H	A	B	B	A	H	H	A
2_05743	1	50.014	A	H	H	H	H	H	H	A	A	B	H	H	H	H	A	B	H	H	B	H	B	H	H	B	A	H	H	H	H	H	H	B	B	H	A	H	H	H	H	H	A	B	B	A	H	H	A
2_09406	1	50.014	A	H	-	H	H	H	H	A	A	B	H	H	H	H	A	B	H	H	B	H	B	H	H	B	A	-	H	-	H	H	H	B	B	H	A	H	H	H	H	H	A	B	B	A	-	H	A
2_18721	1	50.014	A	H	H	H	H	H	H	A	A	B	H	H	H	H	A	B	H	H	B	H	B	H	H	B	A	H	H	H	H	H	H	B	B	H	A	H	H	H	H	H	A	B	B	A	H	H	A
2_19974	1	50.014	A	H	H	H	H	H	H	A	A	B	H	H	H	H	A	B	H	H	B	H	B	H	H	B	A	H	H	H	H	H	H	B	B	H	A	H	H	H	H	H	A	B	B	A	H	H	A
2_24238	1	50.014	A	H	H	H	H	H	H	A	A	B	H	H	H	H	A	B	H	H	B	H	B	H	H	B	A	H	H	H	H	H	H	B	B	H	A	H	H	H	H	H	A	B	B	A	H	H	A
2_24239	1	50.014	A	H	H	H	H	H	H	A	A	B	H	H	H	H	A	B	H	H	B	H	B	H	H	B	A	H	H	H	H	H	H	B	B	H	A	H	H	H	H	H	A	B	B	A	H	H	A
2_26030	1	50.014	A	H	H	H	H	H	H	A	A	B	H	H	H	H	A	B	H	H	B	H	B	H	H	B	A	H	H	H	H	H	H	B	B	H	A	H	H	H	H	H	A	B	B	A	H	H	A
2_28872	1	50.014	A	H	H	H	H	H	H	A	A	B	H	H	H	H	A	B	H	H	B	H	B	H	H	B	A	H	H	H	H	H	H	B	B	H	A	H	H	H	H	H	A	B	B	A	H	H	A
2_31382	1	50.014	A	H	H	H	H	H	H	A	A	B	H	H	H	H	A	B	H	H	B	H	B	H	H	B	A	H	H	H	H	H	H	B	B	H	A	H	H	H	H	H	A	B	B	A	H	H	A
2_32202	1	50.014	A	H	H	H	H	H	H	A	A	B	H	H	H	H	A	B	H	H	B	H	B	H	H	B	A	H	H	H	H	H	H	B	B	H	A	H	H	H	H	H	A	B	B	A	H	H	A
2_33407	1	50.014	A	H	H	H	H	H	H	A	A	B	H	H	H	H	A	B	H	H	B	H	B	H	H	B	A	H	H	H	H	H	H	B	B	H	A	H	H	H	H	H	A	B	B	A	H	H	A
2_34642	1	50.014	A	H	H	H	H	H	H	A	A	B	H	H	H	H	A	B	H	H	B	H	B	H	H	B	A	H	H	H	H	H	H	B	B	H	A	H	H	H	H	H	A	B	B	A	H	H	A
2_39010	1	50.014	A	H	H	H	H	H	H	A	A	B	H	H	H	H	A	B	H	H	B	H	B	H	H	B	A	H	H	H	H	H	H	B	B	H	A	H	H	H	H	H	A	B	B	A	H	H	A
2_43419	1	50.014	A	H	H	H	H	H	H	A	A	B	H	H	H	H	A	B	H	H	B	H	B	H	H	B	A	H	H	H	H	H	H	B	B	H	A	H	H	H	H	H	A	B	B	A	H	H	A
2_54021	1	50.014	A	H	H	H	H	H	H	A	A	B	H	H	H	H	A	B	H	H	B	H	B	H	H	B	A	H	H	H	H	H	H	B	B	H	A	H	H	H	H	H	A	B	B	A	H	H	A
1_0106	1	50.854	A	H	H	H	H	H	H	A	A	B	H	H	H	H	A	B	H	H	B	H	B	H	H	B	A	H	H	H	H	H	H	B	B	H	A	H	A	H	H	H	A	B	B	A	H	H	A
2_05833	1	50.854	A	H	H	H	H	H	H	A	A	B	H	H	H	H	A	B	H	H	B	H	B	H	H	B	A	H	H	H	H	H	H	B	B	H	A	H	A	H	H	H	A	B	B	A	H	H	A
2_07181	1	50.854	A	H	H	H	H	H	H	A	A	B	H	H	H	H	A	B	H	H	B	H	B	H	H	B	A	H	H	H	H	H	H	B	B	H	A	H	A	H	H	H	A	B	B	A	H	H	A
2_07182	1	50.854	A	H	H	H	H	H	H	A	A	B	H	H	H	H	A	B	H	H	B	H	B	H	H	B	A	H	H	H	H	H	H	B	B	H	A	H	A	H	H	H	A	B	B	A	H	H	A
2_07183	1	50.854	A	H	H	H	H	H	H	A	A	B	H	H	H	H	A	B	H	H	B	H	B	H	H	B	A	H	H	H	H	H	H	B	B	H	A	H	A	H	H	H	A	B	B	A	H	H	A
2_17060	1	50.854	A	H	H	H	H	H	H	A	A	B	H	H	H	H	A	B	H	H	B	H	B	H	H	B	A	H	H	H	H	H	H	B	B	H	A	H	A	H	H	H	A	B	B	A	H	H	A
2_20116	1	50.854	A	H	H	H	H	H	H	A	A	B	H	H	H	H	A	B	H	H	B	H	B	H	H	B	A	H	H	H	H	H	H	B	B	H	A	H	A	H	H	H	A	B	B	A	H	H	A
2_24268	1	50.854	A	H	H	H	H	H	H	A	A	B	H	H	H	H	A	B	H	H	B	H	B	H	H	B	A	H	H	H	H	H	H	B	B	H	A	H	A	H	H	H	A	B	B	A	H	H	A
2_24269	1	50.854	A	H	H	H	H	H	H	A	A	B	H	H	H	H	A	B	H	H	B	H	B	H	H	B	A	H	H	H	H	H	H	B	B	H	A	H	A	H	H	H	A	B	B	A	H	H	A
2_26727	1	50.854	A	H	H	H	H	H	H	A	A	B	H	H	H	H	A	B	H	H	B	H	B	H	H	B	A	H	H	H	H	H	H	B	B	H	A	H	A	H	H	H	A	B	B	A	H	H	A
2_26728	1	50.854	A	H	H	H	H	H	H	A	A	B	H	H	H	H	A	B	H	H	B	H	B	H	H	B	A	H	H	H	H	H	H	B	B	H	A	H	A	H	H	H	A	B	B	A	H	H	A
2_27091	1	50.854	A	H	H	H	H	H	H	A	A	B	H	H	H	H	A	B	H	H	B	H	B	H	H	B	A	H	H	H	H	H	H	B	B	H	A	H	A	H	H	H	A	B	B	A	H	H	A
2_27374	1	50.854	A	H	H	H	H	H	H	A	A	B	H	H	H	H	A	B	H	H	B	H	B	H	H	B	A	H	H	H	H	H	H	B	B	H	A	H	A	H	H	H	A	B	B	A	H	H	A
2_31132	1	50.854	A	H	H	H	H	H	H	A	-	B	H	H	H	H	A	B	H	H	B	H	B	H	H	B	A	H	H	H	H	H	H	B	B	H	A	H	A	H	H	H	A	B	B	A	H	H	A
2_34558	1	50.854	A	H	H	H	H	H	H	A	A	B	H	H	H	H	A	B	H	H	B	H	B	H	H	B	A	H	H	H	H	H	H	B	B	H	A	H	A	H	H	H	A	B	B	A	H	H	A
2_44514	1	50.854	A	H	H	H	H	H	H	A	A	B	H	H	H	H	A	B	H	H	B	H	B	H	H	B	A	H	H	H	H	H	H	B	B	H	A	H	A	H	H	H	A	B	B	A	H	H	A
2_49637	1	50.854	A	H	H	H	H	H	H	A	A	B	H	H	H	H	A	B	H	H	B	H	B	H	H	B	A	H	H	H	H	H	H	B	B	H	A	H	A	H	H	H	A	B	B	A	H	H	A
2_55556	1	50.854	-	-	H	H	H	-	H	A	A	B	H	H	H	H	A	B	H	-	B	H	B	H	-	B	A	H	H	H	H	H	H	B	B	H	A	-	A	-	H	H	A	B	B	A	H	H	A
2_01170	1	51.274	A	H	H	H	H	H	H	A	A	B	H	H	H	H	A	B	H	H	B	H	B	H	H	B	A	H	H	H	H	H	H	B	B	H	A	H	A	H	H	H	A	B	B	A	H	H	A
2_03473	1	51.274	A	H	H	H	H	H	H	A	A	B	H	H	H	H	A	B	H	H	B	H	B	H	H	B	A	H	H	H	H	H	H	B	B	H	A	H	A	H	H	H	A	B	B	A	H	H	A
2_03474	1	51.274	A	H	H	H	H	H	H	A	A	B	H	H	H	H	A	B	H	H	B	H	B	H	H	B	A	H	H	H	H	H	H	B	B	H	A	H	A	H	H	H	A	B	B	A	H	H	A
2_15643	1	51.274	A	H	H	H	H	H	H	A	A	B	H	H	H	H	A	B	H	H	B	H	B	H	H	B	A	H	H	H	H	H	H	B	B	H	A	H	A	H	H	H	A	B	B	A	H	H	A
2_15821	1	51.274	A	H	H	H	H	H	H	A	A	B	H	H	H	H	A	B	H	H	B	H	B	H	H	B	A	H	H	H	H	H	H	B	B	H	A	H	A	H	H	H	A	B	B	A	H	H	A
2_24917	1	51.274	A	H	H	H	H	H	H	A	A	B	H	H	H	H	A	B	H	H	B	H	B	H	H	B	A	H	H	H	H	H	H	B	B	H	A	H	A	H	H	H	A	B	B	A	H	H	A
2_26428	1	51.274	A	H	H	H	H	H	H	A	A	B	H	H	H	H	A	B	H	H	B	H	B	H	H	B	A	H	H	H	H	H	H	B	B	H	A	H	A	H	H	H	A	B	B	A	H	H	A
2_27373	1	51.274	A	H	H	H	H	H	H	A	A	B	H	H	H	H	A	B	H	H	B	H	B	H	H	B	A	H	H	H	H	H	H	B	B	H	A	H	A	H	H	H	A	B	B	A	H	H	A
2_30165	1	51.274	A	H	H	H	H	H	H	A	A	B	H	H	H	H	A	B	H	H	B	H	B	H	H	B	A	H	H	H	H	H	H	B	B	H	A	H	A	H	H	H	A	B	B	A	H	H	A
2_32647	1	51.274	A	H	H	H	H	H	H	A	A	B	H	H	H	H	A	B	H	H	B	H	B	H	H	B	A	H	H	H	H	H	H	B	B	H	A	H	A	H	H	H	A	B	B	A	H	H	A
2_53814	1	51.274	A	H	H	H	H	H	H	A	A	B	H	H	H	H	A	B	H	H	B	H	B	H	H	B	A	H	H	H	H	H	H	B	B	H	A	H	A	H	H	H	A	B	B	A	H	H	A
2_53926	1	51.274	A	H	H	H	H	H	H	A	A	B	H	H	H	H	A	B	H	H	B	H	B	H	H	B	A	H	H	H	H	H	H	B	B	H	A	H	A	H	H	H	A	B	B	A	H	H	A
2_04783	1	51.694	A	H	H	H	H	H	H	A	A	B	H	H	H	H	A	B	A	H	B	H	B	H	H	B	A	H	H	H	H	H	H	B	B	H	A	H	A	H	H	H	A	B	B	A	H	H	A
2_08159	1	51.694	A	H	H	H	H	H	H	A	A	B	H	H	H	H	A	B	A	H	B	H	B	H	H	B	A	H	H	H	H	H	H	B	B	H	A	H	A	H	H	H	A	B	B	A	H	H	A
2_10963	1	51.694	A	H	H	H	H	H	H	A	A	B	H	H	H	H	A	B	A	H	B	H	B	H	H	B	A	H	H	H	H	H	H	B	B	H	A	H	A	H	H	H	A	B	B	A	H	H	A
2_10964	1	51.694	A	H	H	H	H	H	H	A	A	B	H	H	H	H	A	B	A	H	B	H	B	H	H	B	A	H	H	H	H	H	H	B	B	H	A	H	A	H	H	H	A	B	B	A	H	H	A
2_11046	1	51.694	A	H	H	H	H	H	H	A	A	B	H	H	H	H	A	B	A	H	B	H	B	H	H	B	A	H	H	H	H	H	H	B	B	H	A	H	A	H	H	H	A	B	B	A	H	H	A
2_11406	1	51.694	A	H	-	H	H	H	H	A	A	B	H	H	H	H	A	B	A	H	B	H	B	H	H	B	A	H	H	H	H	H	H	B	B	H	A	H	A	H	H	H	A	B	B	A	H	H	A
2_11845	1	51.694	A	H	H	H	H	H	H	A	A	B	H	H	H	H	A	B	A	H	B	H	B	H	H	B	A	H	H	H	H	H	H	B	B	H	A	H	A	H	H	H	A	B	B	A	H	H	A
2_13373	1	51.694	A	H	H	H	H	H	H	A	A	B	H	H	H	H	A	B	A	H	B	H	B	H	H	B	A	H	H	H	H	H	H	B	B	H	A	H	A	H	H	H	A	B	B	A	H	H	A
2_15708	1	51.694	A	H	H	H	H	H	H	A	A	B	H	H	H	H	A	B	A	H	B	H	B	H	H	B	A	H	H	H	H	H	H	B	B	H	A	H	A	H	H	H	A	B	B	A	H	H	A
2_16151	1	51.694	A	H	H	H	H	H	H	A	A	B	H	H	H	H	A	B	A	H	B	H	B	H	H	B	A	H	H	H	H	H	H	B	B	H	A	H	A	H	H	H	A	B	B	A	H	H	A
2_18479	1	51.694	A	H	H	H	H	H	H	A	A	B	H	H	H	H	A	B	A	H	B	H	B	H	H	B	A	H	H	H	H	H	H	B	B	H	A	H	A	H	H	H	A	B	B	A	H	H	A
2_19448	1	51.694	A	H	H	H	H	H	H	A	A	B	H	H	H	H	A	B	A	H	B	H	B	H	H	B	A	H	H	H	H	H	H	B	B	H	A	H	A	H	H	H	A	B	B	A	H	H	A
2_19449	1	51.694	A	H	H	H	H	H	H	A	A	B	H	H	H	H	A	B	A	H	B	H	B	H	H	B	A	H	H	H	H	H	H	B	B	H	A	H	A	H	H	H	A	B	B	A	H	H	A
2_22690	1	51.694	A	H	H	H	H	H	H	A	A	B	H	H	H	H	A	B	A	H	B	H	B	H	H	B	A	H	H	H	H	H	H	B	B	H	A	H	A	H	H	H	A	B	B	A	H	H	A
2_22691	1	51.694	A	H	H	H	H	H	H	A	A	B	H	H	H	H	A	B	A	H	B	H	B	H	H	B	A	H	H	H	H	H	H	B	B	H	A	H	A	H	H	H	A	B	B	A	H	H	A
2_22810	1	51.694	A	H	H	H	H	H	H	A	A	B	H	H	H	H	A	B	A	H	B	H	B	H	H	B	A	H	H	H	H	H	H	B	B	H	A	H	A	H	H	H	A	B	B	A	H	H	A
2_28066	1	51.694	A	H	H	H	H	H	H	A	A	B	H	H	H	H	A	B	A	H	B	H	B	H	H	B	A	H	H	H	H	H	H	B	B	H	A	H	A	H	H	H	A	B	B	A	H	H	A
2_28067	1	51.694	A	H	H	H	H	H	H	A	A	B	H	H	H	H	A	B	A	H	B	H	B	H	H	B	A	H	H	H	H	H	H	B	B	H	A	H	A	H	H	H	A	B	B	A	H	H	A
2_28508	1	51.694	A	H	H	H	H	H	H	A	A	B	H	H	H	H	A	B	A	H	B	H	B	H	H	B	A	H	H	H	H	H	H	B	B	H	A	H	A	H	H	H	A	B	B	A	H	H	A
2_28715	1	51.694	A	H	H	H	H	H	H	A	A	B	H	H	H	H	A	B	A	H	B	H	B	H	H	B	A	H	H	H	H	H	H	B	B	H	A	H	A	H	H	H	A	B	B	A	H	H	A
2_28716	1	51.694	A	H	H	H	H	H	H	A	A	B	H	H	H	H	A	B	A	H	B	H	B	H	H	B	A	H	H	H	H	H	H	B	B	H	A	H	A	H	H	H	A	B	B	A	H	H	A
2_28717	1	51.694	A	H	H	H	H	H	H	A	A	B	H	H	H	H	A	B	A	H	B	H	B	H	H	B	A	H	H	H	H	H	H	B	B	H	A	H	A	H	H	H	A	B	B	A	H	H	A
2_28718	1	51.694	A	H	-	H	H	H	H	A	A	B	H	H	H	H	A	B	A	H	B	H	B	H	H	B	A	H	H	H	H	H	H	B	B	H	A	H	A	H	H	H	A	B	B	A	H	H	A
2_28826	1	51.694	A	H	H	H	H	H	H	A	A	B	H	H	H	H	A	B	A	H	B	H	B	H	H	B	A	H	H	H	H	H	H	B	B	H	A	H	A	H	H	H	A	B	B	A	H	H	A
2_28827	1	51.694	A	H	H	H	H	H	H	A	A	B	H	H	H	H	A	B	A	H	B	H	B	H	H	B	A	H	H	H	H	H	H	B	B	H	A	H	A	H	H	H	A	B	B	A	H	H	A
2_29056	1	51.694	A	H	H	H	H	H	H	A	A	B	H	H	H	H	A	B	A	H	B	H	B	H	H	B	A	H	H	H	H	H	H	B	B	H	A	H	A	H	H	H	A	B	B	A	H	H	A
2_29403	1	51.694	A	H	H	H	H	H	H	A	A	B	H	H	H	H	A	B	A	H	B	H	B	H	H	B	A	H	H	H	H	H	H	B	B	H	A	H	A	H	H	H	A	B	B	A	H	H	A
2_30138	1	51.694	A	H	H	H	H	H	H	A	A	B	H	H	H	H	A	B	A	H	B	H	B	H	H	B	A	H	H	H	H	H	H	B	B	H	A	H	A	H	H	H	A	B	B	A	H	H	A
2_31590	1	51.694	A	H	H	H	H	H	H	A	A	B	H	H	H	H	A	B	A	H	B	H	B	H	H	B	A	H	H	H	H	H	H	B	B	H	A	H	A	H	H	H	A	B	B	A	H	H	A
2_31591	1	51.694	A	H	H	H	H	H	H	A	A	B	H	H	H	H	A	B	A	H	B	H	B	H	H	B	A	H	H	H	H	H	H	B	B	H	A	H	A	H	H	H	A	B	B	A	H	H	A
2_32753	1	51.694	A	H	H	H	H	H	H	A	A	B	H	H	H	H	A	B	A	H	B	H	B	H	H	B	A	H	H	H	H	H	H	B	B	H	A	H	A	H	H	H	A	B	B	A	H	H	A
2_34043	1	51.694	A	H	H	H	H	H	H	A	A	B	H	H	H	H	A	B	A	H	B	H	B	H	H	B	A	H	H	H	H	H	H	B	B	H	A	H	A	H	H	H	A	B	B	A	H	H	A
2_34198	1	51.694	A	H	H	H	H	H	H	A	A	B	H	H	H	H	A	B	A	H	B	H	B	H	H	B	A	H	H	H	H	H	H	B	B	H	A	H	A	H	H	H	A	B	B	A	H	H	A
2_34243	1	51.694	A	H	H	H	H	H	H	A	A	B	H	H	H	H	A	B	A	H	B	H	B	H	H	B	A	H	H	H	H	H	H	B	B	H	A	H	A	H	H	H	A	B	B	A	H	H	A
2_34387	1	51.694	A	H	H	H	H	H	H	A	A	B	H	H	H	H	A	B	A	H	B	H	B	H	H	B	A	H	H	H	H	H	H	B	B	H	A	H	A	H	H	H	A	B	B	A	H	H	A
2_40176	1	51.694	A	H	H	H	H	H	H	A	A	B	H	H	H	H	A	B	A	H	B	H	B	H	H	B	A	H	H	H	H	H	H	B	B	H	A	H	A	H	H	H	A	B	B	A	H	H	A
2_41363	1	51.694	A	H	H	H	H	H	H	A	A	B	H	H	H	H	A	B	A	H	B	H	B	H	H	B	A	H	H	H	H	H	H	B	B	H	A	H	A	H	H	H	A	B	B	A	H	H	A
2_42956	1	51.694	A	H	H	H	H	H	H	A	A	B	H	H	H	H	A	B	A	H	B	H	B	H	H	B	A	H	H	H	H	H	H	B	B	H	A	H	A	H	H	H	A	B	B	A	H	H	A
2_51092	1	51.694	A	H	H	H	H	H	H	A	A	B	H	H	H	H	A	B	A	H	B	H	B	H	-	B	A	H	H	H	H	H	H	B	B	H	A	H	A	H	H	H	A	B	B	A	H	H	A
2_51157	1	51.694	A	H	H	H	H	H	H	A	A	B	H	H	H	H	A	B	A	H	B	H	B	H	H	B	A	H	H	H	H	H	H	B	B	H	A	H	A	H	H	H	A	B	B	A	H	H	A
2_52301	1	51.694	A	H	H	H	H	H	H	A	A	B	H	H	H	H	A	B	A	H	B	H	B	H	H	B	A	H	H	H	H	H	H	B	B	H	A	H	A	H	H	H	A	B	B	A	H	H	A
2_53421	1	51.694	A	H	H	H	H	H	H	A	A	B	H	H	H	H	A	B	A	H	B	H	B	H	H	B	A	H	H	H	H	H	H	B	B	H	A	H	A	H	H	H	A	B	B	A	H	H	A
2_07662	1	52.115	A	H	H	H	H	H	A	A	A	B	H	H	H	H	A	B	A	H	B	H	B	H	H	B	A	H	H	H	H	H	H	B	B	H	A	H	A	H	H	H	A	B	B	A	H	H	A
2_27028	1	52.115	A	H	H	H	H	H	A	A	A	B	H	H	H	H	A	B	A	H	B	H	B	H	H	B	A	H	H	H	H	H	H	B	B	H	A	H	A	H	H	H	A	B	B	A	H	H	A
2_31013	1	52.115	A	H	H	H	H	H	A	A	A	B	H	H	H	H	A	B	A	H	B	H	B	H	H	B	A	H	H	H	H	H	H	B	B	H	A	H	A	H	H	H	A	B	B	A	H	H	A
2_18359	1	52.535	A	H	H	H	H	H	A	A	A	B	H	H	H	H	A	B	A	H	B	H	B	H	H	B	A	H	H	H	H	H	H	B	B	H	A	H	A	H	H	H	A	B	B	A	H	H	A
2_39147	1	52.535	A	H	H	H	H	H	A	A	A	B	H	H	H	H	A	B	A	H	B	H	B	H	H	B	A	H	H	H	H	H	H	B	B	H	A	H	A	H	H	H	A	B	B	A	H	H	A
2_49867	1	52.535	A	H	H	H	H	H	A	A	A	B	H	H	H	H	A	B	A	H	B	H	B	H	H	B	A	H	H	H	H	H	H	B	B	H	A	H	A	H	H	H	A	B	B	A	H	H	A
2_18435	1	53.375	A	H	H	H	H	H	A	A	A	B	H	H	H	H	A	B	A	H	B	H	B	H	H	B	A	H	H	H	H	H	H	B	B	H	A	H	A	H	H	H	A	B	B	A	H	H	A
2_27719	1	53.375	A	H	H	H	H	H	A	A	A	B	H	H	H	H	A	B	A	H	B	H	B	H	H	B	A	H	H	H	H	H	H	B	B	H	A	H	A	H	H	H	A	B	B	A	H	H	A
2_51167	1	53.375	A	H	H	H	H	H	A	A	A	B	H	H	H	H	A	B	A	H	B	H	B	H	H	B	A	H	H	H	H	H	H	B	B	H	A	H	A	H	H	H	A	B	B	A	H	H	A
1_0678	1	53.795	A	H	H	H	H	H	A	A	A	B	H	H	H	H	A	B	A	H	B	H	B	H	H	B	A	H	H	H	H	H	H	B	B	H	A	H	A	H	H	H	A	H	B	A	H	H	A
2_06986	1	53.795	A	H	H	H	H	H	A	A	A	B	H	H	H	H	A	B	A	H	B	H	B	H	H	B	A	H	H	H	H	H	H	B	B	H	A	H	A	H	H	H	A	H	B	A	H	H	A
2_06987	1	53.795	A	H	H	H	H	H	A	A	A	B	H	H	H	H	A	B	A	H	B	H	B	H	H	B	A	H	H	H	H	H	H	B	B	H	A	H	A	H	H	H	A	H	B	A	H	H	A
2_08420	1	53.795	A	H	H	H	H	H	A	A	A	B	H	H	H	H	A	B	A	H	B	H	B	H	H	B	A	H	H	H	H	H	H	B	B	H	A	H	A	H	H	H	A	H	B	A	H	H	A
2_10756	1	53.795	A	H	H	H	H	H	A	A	A	B	H	H	H	H	A	B	A	H	B	H	B	H	H	B	A	H	H	H	H	H	H	B	B	H	A	H	A	H	H	H	A	H	B	A	H	H	A
2_14281	1	53.795	A	H	H	H	H	H	A	A	A	B	H	H	H	H	A	B	A	H	B	H	B	H	H	B	A	H	H	H	H	H	H	B	B	H	A	H	A	H	H	H	A	H	B	A	H	H	A
2_19086	1	53.795	A	H	H	H	H	H	A	A	A	B	H	H	H	H	A	B	A	H	B	H	B	H	H	B	A	H	H	H	H	H	H	B	B	H	A	H	A	H	H	H	A	H	B	A	H	H	A
2_19303	1	53.795	A	H	H	H	H	H	A	A	A	B	H	H	H	H	A	B	A	H	B	H	B	H	H	B	A	H	H	H	H	H	H	B	B	H	A	H	A	H	H	H	A	H	B	A	H	H	A
2_41395	1	53.795	A	H	H	H	H	H	A	A	A	B	H	H	H	H	A	B	A	H	B	H	B	H	H	B	A	H	H	H	H	H	H	B	B	H	A	H	A	H	H	H	A	H	B	A	H	H	A
2_05627	1	54.216	A	H	H	H	H	H	A	H	A	B	H	H	H	H	A	B	A	H	B	H	B	H	H	B	A	H	H	H	H	H	H	B	B	H	A	H	A	H	H	H	A	H	B	A	H	H	A
2_06602	1	54.216	A	H	H	H	H	H	A	H	A	B	H	H	H	H	A	B	A	H	B	H	B	H	H	B	A	H	H	H	H	H	H	B	B	H	A	H	A	H	H	H	A	H	B	A	H	H	A
2_06603	1	54.216	A	H	H	H	H	H	A	H	A	B	H	H	H	H	A	B	A	H	B	H	B	H	H	B	A	H	H	H	H	H	H	B	B	H	A	H	A	H	H	H	A	H	B	A	H	H	A
2_09408	1	54.216	A	H	H	H	H	H	A	H	A	B	H	H	H	H	A	B	A	H	B	H	B	H	H	B	A	H	H	H	H	H	H	B	B	H	A	H	A	H	H	H	A	H	B	A	H	H	A
2_16913	1	54.216	A	H	H	H	H	H	A	H	A	B	H	H	H	H	A	B	A	H	B	H	B	H	H	B	A	H	H	H	H	H	H	B	B	H	A	H	A	H	H	H	A	H	B	A	H	H	A
2_37257	1	54.216	A	H	H	H	H	H	A	H	A	B	H	H	H	H	A	B	A	H	B	H	B	H	H	B	A	H	H	H	H	H	H	B	B	H	A	H	A	H	H	H	A	H	B	A	H	H	A
2_13529	1	54.636	A	H	H	H	H	H	A	H	A	B	H	H	H	H	A	B	A	H	H	H	B	H	H	B	A	H	H	H	H	H	H	B	B	H	A	H	A	H	H	H	A	H	B	A	H	H	A
2_16573	1	54.636	A	H	H	H	H	H	A	H	A	B	H	H	H	H	A	B	A	H	H	H	B	H	H	B	A	H	H	H	H	H	H	B	B	H	A	H	A	H	H	H	A	H	B	A	H	H	A
2_18974	1	54.636	A	H	H	H	H	H	A	H	A	B	H	H	H	H	A	B	A	H	H	H	B	H	H	B	A	H	H	H	H	H	H	B	B	H	A	H	A	H	H	H	A	H	B	A	H	H	A
2_30091	1	54.636	A	H	H	H	H	H	A	H	A	B	H	H	H	H	A	B	A	H	H	H	B	H	H	B	A	H	H	H	H	H	H	B	B	H	A	H	A	H	H	H	A	H	B	A	H	H	A
2_33321	1	54.636	A	H	H	H	H	H	A	H	A	B	H	H	H	H	A	B	A	H	H	H	B	H	H	B	A	H	H	H	H	H	H	B	B	H	A	H	A	H	H	H	A	H	B	A	H	H	A
2_49965	1	54.636	A	H	H	H	H	H	A	H	A	B	H	H	H	H	A	B	A	H	H	H	B	H	H	B	A	H	H	H	H	H	H	B	B	H	A	H	A	H	H	H	A	H	B	A	H	H	A
2_50958	1	54.636	A	H	H	H	H	H	A	H	A	B	H	H	H	H	A	B	A	H	H	H	B	H	H	B	A	H	H	H	H	H	H	B	B	H	A	H	A	H	H	H	A	H	B	A	H	H	A
2_54161	1	54.636	A	H	H	H	H	H	A	H	A	B	H	H	H	H	A	B	A	H	H	H	B	H	H	B	A	H	H	H	H	H	H	B	B	H	A	H	A	H	H	H	A	H	B	A	H	H	A
2_20182	1	55.056	A	H	H	H	H	H	A	H	A	B	H	H	H	H	A	B	A	H	H	H	B	H	H	B	A	H	H	H	H	H	H	B	B	H	A	H	A	H	H	H	A	H	B	A	H	H	A
2_22809	1	55.056	A	H	H	H	H	H	A	H	A	B	H	H	H	H	A	B	A	H	H	H	B	H	H	B	A	H	H	H	H	H	H	B	B	H	A	H	A	H	H	H	A	H	B	A	H	H	A
2_29001	1	55.056	A	H	H	H	H	H	A	H	A	B	H	H	H	H	A	B	A	H	H	H	B	H	H	B	A	H	H	H	H	H	H	B	B	H	A	H	A	H	H	H	A	H	B	A	H	H	A
2_34229	1	55.056	A	H	H	H	H	H	A	H	-	B	H	H	H	H	A	B	A	H	H	H	B	H	H	B	A	H	H	H	H	H	H	B	B	H	A	H	A	H	H	H	A	H	B	A	H	H	A
2_54804	1	55.056	A	H	H	H	H	H	A	H	A	B	H	H	H	H	A	B	A	H	H	H	B	H	H	B	A	H	H	H	H	H	H	B	B	H	A	H	A	H	H	H	A	H	B	A	H	H	A
2_18532	1	55.476	A	H	H	H	H	H	A	H	A	B	H	H	H	H	A	B	A	H	H	H	B	H	H	B	A	H	H	H	H	H	H	B	B	H	A	H	A	H	H	H	A	H	B	A	H	H	A
2_43739	1	55.476	A	H	H	H	H	H	A	H	A	B	H	H	H	H	A	B	A	H	H	H	B	H	H	B	A	H	H	H	H	H	H	B	B	H	A	H	A	H	H	H	A	H	B	A	H	H	A
2_15682	1	55.896	A	H	H	H	H	H	A	H	A	B	H	H	H	H	A	B	A	H	H	H	B	H	H	B	A	H	H	H	H	H	H	B	B	H	A	H	A	H	H	H	A	H	B	A	H	H	A
2_15683	1	55.896	A	H	H	H	H	H	A	H	A	B	H	H	H	H	A	B	A	H	H	H	B	H	H	B	A	H	H	H	H	H	H	B	B	H	A	H	A	H	H	H	A	H	B	A	H	H	A
2_21697	1	55.896	A	H	H	H	H	H	A	H	A	B	H	H	H	H	A	B	A	H	H	H	B	H	H	B	A	H	H	H	H	H	H	B	B	H	A	H	A	H	H	H	A	H	B	A	H	H	A
2_21698	1	55.896	A	H	H	H	H	H	A	H	A	B	H	H	H	H	A	B	A	H	H	H	B	H	H	B	A	H	H	H	H	H	H	B	B	H	A	H	A	H	H	H	A	H	B	A	H	H	A
2_41147	1	55.896	A	H	H	H	H	H	A	H	A	B	H	H	H	H	A	B	A	H	H	H	B	H	H	B	A	H	H	H	H	H	H	B	B	H	A	H	A	H	H	H	A	H	B	A	H	H	A
2_44554	1	55.896	A	H	H	H	H	H	A	H	A	B	H	H	H	H	A	B	A	H	H	H	B	H	H	B	A	H	H	H	H	H	H	B	B	H	A	H	A	H	H	H	A	H	B	A	H	H	A
2_07038	1	57.157	A	B	H	H	H	H	A	H	A	B	H	H	H	H	A	B	A	H	H	H	B	H	H	H	A	H	H	H	H	H	H	B	B	H	A	H	A	H	H	H	A	H	B	A	H	H	A
2_27322	1	57.157	A	B	H	H	H	H	A	H	A	B	H	H	H	H	A	B	A	H	H	H	B	H	H	H	A	H	H	H	H	H	H	B	B	H	A	H	A	H	H	H	A	H	B	A	H	H	A
2_27323	1	57.157	A	B	H	H	H	H	A	H	A	B	H	H	H	H	A	B	A	H	H	H	B	H	H	H	A	H	H	H	H	H	H	B	B	H	A	H	A	H	H	H	A	H	B	A	H	H	A
1_0117	1	57.577	A	B	H	H	H	H	A	H	A	B	H	H	H	H	A	B	A	H	H	H	B	H	H	H	A	H	H	H	H	H	H	B	B	H	A	H	A	H	H	H	A	H	B	A	H	H	A
2_03528	1	57.577	A	B	H	H	H	H	A	H	A	B	H	H	H	H	A	B	A	H	H	H	B	H	H	H	A	H	H	H	H	H	H	B	B	H	A	H	A	H	H	H	A	H	B	A	H	H	A
2_03529	1	57.577	A	B	H	H	H	H	A	H	A	B	H	H	H	H	A	B	A	H	H	H	B	H	H	H	A	H	H	H	H	H	H	B	B	H	A	H	A	H	H	H	A	H	B	A	H	H	A
2_16808	1	57.577	A	B	H	H	H	H	A	H	A	B	H	H	H	H	A	B	A	H	H	H	B	H	H	H	A	H	H	H	H	H	H	B	B	H	A	H	A	H	H	H	A	H	B	A	H	H	A
2_25985	1	57.577	A	B	H	H	H	H	A	H	A	B	H	H	H	H	A	B	A	H	H	H	B	H	H	H	A	H	H	H	H	H	H	B	B	H	A	H	A	H	H	H	A	H	B	A	H	H	A
2_25986	1	57.577	A	B	H	H	H	H	A	H	A	B	H	H	H	H	A	B	A	H	H	H	B	H	H	H	A	H	H	H	H	H	H	B	B	H	A	H	A	H	H	H	A	H	B	A	H	H	A
2_30362	1	57.577	A	B	H	H	H	H	A	H	-	B	H	H	H	H	A	B	A	H	H	H	B	H	H	H	A	H	H	H	H	H	H	B	B	H	A	H	A	H	H	H	A	H	B	A	H	H	A
2_34701	1	57.577	A	B	H	H	H	H	A	H	A	B	H	H	H	H	A	B	A	H	H	H	B	H	H	H	A	H	H	H	H	H	H	B	B	H	A	H	A	H	H	H	A	H	B	A	H	H	A
2_27364	1	57.997	A	B	H	H	H	H	A	H	A	B	H	H	H	A	A	B	A	H	H	H	B	H	H	H	A	H	H	H	H	H	H	B	B	H	A	H	A	H	H	H	A	H	B	A	H	H	A
2_30368	1	57.997	A	B	H	H	H	H	A	H	A	B	H	H	H	A	A	B	A	H	H	H	B	H	H	H	A	H	H	H	H	H	H	B	B	H	A	H	A	H	H	H	A	H	B	A	H	H	A
2_33132	1	57.997	A	B	H	H	H	H	A	H	A	B	H	H	H	A	A	B	A	H	H	H	B	H	H	H	A	H	H	H	H	H	H	B	B	H	A	H	A	H	H	H	A	H	B	A	H	H	A
2_06347	1	58.418	A	B	H	H	H	H	A	H	A	B	H	H	H	A	A	B	A	H	H	H	B	H	H	H	A	H	H	H	H	H	H	B	B	H	A	H	A	H	H	H	A	H	B	A	H	H	A
2_17525	1	58.418	A	B	H	H	H	H	A	H	A	B	H	H	H	A	A	B	A	H	H	H	B	H	H	H	A	H	H	H	H	H	H	B	B	H	A	H	A	H	H	H	A	H	B	A	H	H	A
2_18107	1	58.418	A	B	H	H	H	H	A	H	A	B	H	H	H	A	A	B	A	H	H	H	B	H	H	H	A	H	H	H	H	H	H	B	B	H	A	H	A	H	H	H	A	H	B	A	H	H	A
2_14797	1	58.838	A	B	H	H	H	H	A	H	A	B	H	H	H	A	A	B	A	H	H	H	B	H	H	H	A	H	H	H	H	H	H	B	B	H	A	H	A	H	H	H	A	H	B	A	H	H	A
2_32361	1	59.762	A	-	-	-	-	H	A	H	H	B	H	H	H	A	A	B	A	H	H	H	B	H	H	H	A	H	H	H	-	H	H	B	-	H	A	H	A	H	H	H	A	H	B	A	H	H	A
2_06311	1	60.182	A	B	H	H	-	H	A	H	A	-	H	H	H	A	A	B	A	H	H	H	B	H	H	H	A	H	H	H	H	H	H	B	B	H	A	H	A	H	H	H	A	H	B	A	H	H	A
2_06596	1	60.182	A	B	H	H	H	H	A	H	A	B	H	H	H	A	A	B	A	H	H	H	B	H	H	H	A	H	H	H	H	H	H	B	B	H	A	H	A	H	H	H	A	H	B	A	H	H	A
2_06597	1	60.182	A	B	H	H	H	H	A	H	A	B	H	H	H	A	A	B	A	H	H	H	B	H	H	H	A	H	H	H	H	H	H	B	B	H	A	H	A	H	H	H	A	H	B	A	H	H	A
2_08207	1	60.182	A	B	H	H	H	H	A	H	A	B	H	H	H	A	A	B	A	H	H	H	B	H	H	H	A	H	H	H	H	H	H	B	B	H	A	H	A	H	H	H	A	H	B	A	H	H	A
2_09012	1	60.182	A	B	H	H	H	H	A	H	A	B	H	H	H	A	A	B	A	H	H	H	B	H	H	H	A	H	H	H	H	H	H	B	B	H	A	H	A	H	H	H	A	H	B	A	H	H	A
2_09013	1	60.182	A	B	H	H	H	H	A	H	A	B	H	H	H	A	A	B	A	H	H	H	B	H	H	H	A	H	H	H	H	H	H	B	B	H	A	H	A	H	H	H	A	H	B	A	H	H	A
2_18496	1	60.182	A	B	H	H	H	H	A	H	A	B	H	H	H	A	A	B	A	H	H	H	B	H	H	H	A	H	H	H	H	H	H	B	B	H	A	H	A	H	H	H	A	H	B	A	H	H	A
2_20119	1	60.182	A	B	H	H	H	H	A	H	A	B	H	H	H	A	A	B	A	H	H	H	B	H	H	H	A	H	H	H	H	H	H	B	B	H	A	H	A	H	H	H	A	H	B	A	H	H	A
2_23439	1	60.182	A	B	H	H	H	H	A	H	A	B	H	H	H	A	A	B	A	H	H	H	B	H	H	H	A	H	H	H	H	H	H	B	B	H	A	H	A	H	H	H	A	H	B	A	H	H	A
2_24445	1	60.182	A	B	H	H	H	H	A	H	A	B	H	H	H	A	A	B	A	H	H	H	B	H	H	H	A	H	H	H	H	H	H	B	B	H	A	H	A	H	H	H	A	H	B	A	H	H	A
2_27019	1	60.182	A	B	H	H	H	H	A	H	A	B	H	H	H	A	A	B	A	H	H	H	B	H	H	H	A	H	H	H	H	H	H	B	B	H	A	H	A	H	H	H	A	H	B	A	H	H	A
2_27020	1	60.182	A	B	H	H	H	H	A	H	A	B	H	H	H	A	A	B	A	H	H	H	B	H	H	H	A	H	H	H	H	H	H	B	B	H	A	H	A	H	H	H	A	H	B	A	H	H	A
2_27021	1	60.182	A	B	H	H	H	H	A	H	A	B	H	H	H	A	A	B	A	H	H	H	B	H	H	H	A	H	H	H	H	H	H	B	B	H	A	H	A	H	H	H	A	H	B	A	H	H	A
2_27078	1	60.182	A	B	H	H	H	H	A	H	A	B	H	H	H	A	A	B	A	H	H	H	B	H	H	H	A	H	H	H	H	H	H	B	B	H	A	H	A	H	H	H	A	H	B	A	H	H	A
2_27767	1	60.182	A	B	H	H	H	H	A	H	A	B	H	H	H	A	A	B	A	H	H	H	B	H	H	H	A	H	H	H	H	H	H	B	B	H	A	H	A	H	H	H	A	H	B	A	H	H	A
2_33239	1	60.182	A	B	H	H	H	H	A	H	A	B	H	H	H	A	A	B	A	H	H	H	B	H	H	H	A	H	H	H	H	H	H	B	B	H	A	H	A	H	H	H	A	H	B	A	H	H	A
2_39322	1	60.182	A	B	H	H	H	H	A	H	A	B	H	H	H	A	A	B	A	H	H	H	B	H	H	H	A	H	H	H	H	H	H	B	B	H	A	H	A	H	H	H	A	H	B	A	H	H	A
2_44007	1	60.182	A	B	H	H	H	H	A	H	-	B	H	H	H	A	A	B	A	H	H	H	B	H	H	H	A	H	H	H	H	H	H	B	B	H	A	H	A	H	H	H	A	H	B	A	H	H	A
2_49627	1	60.182	A	B	H	H	H	H	A	H	A	B	H	H	H	A	A	B	A	H	H	H	B	H	H	H	A	H	H	H	H	H	H	B	B	H	A	H	A	H	H	H	A	H	B	A	H	H	A
2_54988	1	60.182	A	B	H	H	H	H	A	H	A	B	H	H	H	A	A	B	A	H	H	H	B	H	H	H	A	H	H	H	H	H	H	B	B	H	A	H	A	H	H	H	A	H	B	A	H	H	A
2_19030	1	60.603	A	B	H	H	H	H	A	H	A	B	H	H	H	A	A	B	A	H	H	H	B	H	H	H	A	H	H	H	H	H	H	B	B	H	A	H	A	H	H	H	A	H	B	A	H	H	A
2_28088	1	60.603	A	B	H	H	H	H	A	H	A	B	H	H	H	A	A	B	A	H	H	H	B	H	H	H	A	H	H	H	H	H	H	B	B	H	A	H	A	H	H	H	A	H	B	A	H	H	A
2_28089	1	60.603	A	B	H	H	H	H	A	H	A	B	H	H	H	A	A	B	A	H	H	H	B	H	H	H	A	H	H	H	H	H	H	B	B	H	A	H	A	H	H	H	A	H	B	A	H	H	A
2_30800	1	60.603	A	B	H	H	H	H	A	H	A	B	H	H	H	A	A	B	A	H	H	H	B	H	H	H	A	H	H	H	H	H	H	B	B	H	A	H	A	H	H	H	A	H	B	A	H	H	A
2_16630	1	61.023	H	B	H	H	H	H	A	H	A	B	H	H	H	A	A	B	A	H	H	H	B	H	H	H	A	H	H	H	H	H	H	B	B	H	A	H	A	H	H	H	A	H	B	A	H	H	A
2_17041	1	61.023	H	B	H	H	H	H	A	H	A	B	H	H	H	A	A	B	A	H	H	H	B	H	H	H	A	H	H	H	H	H	H	B	B	H	A	H	A	H	H	H	A	H	B	A	H	H	A
2_28738	1	61.023	H	B	H	H	H	H	A	H	A	B	H	H	H	A	A	B	A	H	H	H	B	H	H	H	A	H	H	H	H	H	H	B	B	H	A	H	A	H	H	H	A	H	B	A	H	H	A
2_49620	1	61.023	H	B	H	H	H	H	A	H	A	B	H	H	H	A	A	B	A	H	H	H	B	H	H	H	A	H	H	H	H	H	H	B	B	H	A	H	A	H	H	H	A	H	B	A	H	H	A
2_03380	1	61.863	H	B	H	H	H	H	A	H	A	B	H	H	H	A	A	B	A	H	H	H	B	H	H	H	A	H	H	H	H	H	B	B	B	H	A	H	A	H	H	H	H	H	B	A	H	H	A
2_18049	1	61.863	H	B	H	H	H	H	A	H	A	B	H	H	H	A	A	B	A	H	H	H	B	H	H	H	A	H	H	H	H	H	B	B	B	H	A	H	A	H	H	H	H	H	B	A	H	H	A
2_28713	1	61.863	H	B	H	H	H	H	A	H	A	B	H	H	H	A	A	B	A	H	H	H	B	H	H	H	A	H	H	H	H	H	B	B	B	H	A	H	A	H	H	H	H	H	B	A	H	H	A
2_28714	1	61.863	H	B	H	H	H	H	A	H	A	B	H	H	H	A	A	B	A	H	H	H	B	H	H	H	A	H	H	H	H	H	B	B	B	H	A	H	A	H	H	H	H	H	B	A	H	H	A
2_29101	1	61.863	H	B	H	H	H	H	A	H	A	B	H	H	H	A	A	B	A	H	H	H	B	H	H	H	A	H	H	H	H	H	B	B	B	H	A	H	A	H	H	H	H	H	B	A	H	H	A
2_33537	1	61.863	H	B	H	H	H	H	A	H	A	B	H	H	H	A	A	B	A	H	H	H	B	H	H	H	A	H	H	H	H	H	B	B	B	H	A	H	A	H	H	H	H	H	B	A	H	H	A
2_47242	1	61.863	H	B	H	H	H	H	A	H	A	B	H	H	H	A	A	B	A	H	H	H	B	H	H	H	A	H	H	H	H	H	B	B	B	H	A	H	A	H	H	H	H	H	B	A	H	H	A
2_21302	1	62.283	H	B	H	H	H	H	A	H	A	B	H	H	H	A	A	B	A	H	H	H	B	H	H	H	A	H	H	H	H	H	B	B	B	H	A	H	A	H	H	H	H	H	B	A	H	H	A
2_21303	1	62.283	H	B	H	H	H	H	A	H	A	B	H	H	H	A	A	B	A	H	H	H	B	H	H	H	A	H	H	H	H	H	B	B	B	H	A	H	A	H	H	H	H	H	B	A	H	H	A
2_21316	1	62.283	H	B	H	H	H	H	A	H	A	B	H	H	H	A	A	B	A	H	H	H	B	H	H	H	A	H	H	H	H	H	B	B	B	H	A	H	A	H	H	H	H	H	B	A	H	H	A
2_21317	1	62.283	H	B	H	H	H	H	A	H	A	B	H	H	H	A	A	B	A	H	H	H	B	H	H	H	A	H	H	H	H	H	B	B	B	H	A	H	A	H	H	H	H	H	B	A	H	H	A
2_47499	1	62.283	H	B	H	H	H	H	A	H	A	B	H	H	H	A	A	B	A	H	H	H	B	H	H	H	A	H	H	H	H	H	B	B	B	H	A	H	A	H	H	H	H	H	B	A	H	H	A
2_55564	1	62.283	H	B	H	H	H	H	A	H	A	B	H	H	H	A	A	B	A	H	H	H	B	H	H	H	A	H	H	H	H	H	B	B	B	H	A	H	A	H	H	H	H	H	B	A	H	H	A
1_0038	1	62.704	H	B	H	H	H	H	A	H	A	B	H	H	H	A	A	B	A	H	H	H	B	H	H	H	A	H	H	H	H	H	B	B	B	H	A	H	A	H	H	H	H	H	B	A	H	H	A
2_17838	1	62.704	H	B	H	H	H	H	A	H	A	B	H	H	H	A	A	B	A	H	H	H	B	H	H	H	A	H	H	H	H	H	B	B	B	H	A	H	A	H	H	H	H	H	B	A	H	H	A
2_22354	1	62.704	H	B	H	H	H	H	A	H	A	B	H	H	H	A	A	B	A	H	H	H	B	H	H	H	A	H	H	H	H	H	B	B	B	H	A	H	A	H	H	H	H	H	B	A	H	H	A
2_03237	1	63.124	H	B	H	H	H	H	A	H	A	B	H	H	H	A	A	B	A	H	H	H	B	H	H	H	A	H	H	H	H	H	B	B	B	H	A	H	A	H	H	H	H	H	B	A	H	H	A
2_03398	1	63.124	H	B	H	H	H	H	A	H	A	B	H	H	H	A	A	B	A	H	H	H	B	H	H	H	A	H	H	H	H	H	B	B	B	H	A	H	A	H	H	H	H	H	B	A	H	H	A
2_03399	1	63.124	H	B	H	H	H	H	A	H	A	B	H	H	H	A	A	B	A	H	H	H	B	H	H	H	A	H	H	H	H	H	B	B	B	H	A	H	A	H	H	H	H	H	B	A	H	H	A
2_46550	1	63.124	H	B	H	H	H	H	A	H	A	B	H	H	H	A	A	B	A	H	H	H	B	H	H	H	A	H	H	H	H	H	B	B	B	H	A	H	A	H	H	H	H	H	B	A	H	H	A
1_1013	1	63.544	H	B	H	H	H	H	A	H	A	B	H	H	H	A	A	B	A	H	H	H	B	H	H	H	A	H	H	H	H	H	B	B	B	H	A	H	A	H	H	H	H	A	B	A	H	H	A
2_04935	1	63.544	H	B	H	H	H	H	A	H	A	B	H	H	H	A	A	B	A	H	H	H	B	H	H	H	A	H	H	H	H	H	B	B	B	H	A	H	A	H	H	H	H	A	B	A	H	H	A
2_05224	1	63.544	H	B	H	H	H	H	A	H	A	B	H	H	H	A	A	B	A	H	H	H	B	H	H	H	A	H	H	H	H	H	B	B	B	H	A	H	A	H	H	H	H	A	B	A	H	H	A
2_12551	1	63.544	H	B	H	H	H	H	A	H	A	B	H	H	H	A	A	B	A	H	H	H	B	H	H	H	A	H	H	H	H	H	B	B	B	H	A	H	A	H	H	H	H	A	B	A	H	H	A
2_17727	1	63.544	H	B	H	H	H	H	A	H	A	B	H	H	H	A	A	B	A	H	H	H	B	H	H	H	A	H	H	H	H	H	B	B	B	H	A	H	A	H	H	H	H	A	B	A	H	H	A
2_20030	1	63.544	H	B	H	H	H	H	A	H	A	B	H	H	H	A	A	B	A	H	H	H	B	H	H	H	A	H	H	H	H	H	B	B	B	H	A	H	A	H	H	H	H	A	B	A	H	H	A
2_20031	1	63.544	H	B	H	H	H	H	A	H	A	B	H	H	H	A	A	B	A	H	H	H	B	H	H	H	A	H	H	H	H	H	B	B	B	H	A	H	A	H	H	H	H	A	B	A	H	H	A
2_20544	1	63.544	H	B	H	H	H	H	A	H	A	B	H	H	H	A	A	B	A	H	H	H	B	H	H	H	A	H	H	H	H	H	B	B	B	H	A	H	A	H	H	H	H	A	B	A	H	H	A
2_22126	1	63.544	H	B	H	H	H	H	A	H	A	B	H	H	H	A	A	B	A	H	H	H	B	H	H	H	A	H	H	H	H	H	B	B	B	H	A	H	A	H	H	H	H	A	B	A	H	H	A
2_22127	1	63.544	H	B	H	H	H	H	A	H	A	B	H	H	H	A	A	B	A	H	H	H	B	H	H	H	A	H	H	H	H	H	B	B	B	H	A	H	A	H	H	H	H	A	B	A	H	H	A
2_23240	1	63.544	H	B	H	H	H	H	A	H	A	B	H	H	H	A	A	B	A	H	H	H	B	H	H	H	A	H	H	H	H	H	B	B	B	H	A	H	A	H	H	H	H	A	B	A	H	H	A
2_23241	1	63.544	H	B	H	H	H	H	A	H	A	B	H	H	H	A	A	B	A	H	H	H	B	H	H	H	A	H	H	H	H	H	B	B	B	H	A	H	A	H	H	H	H	A	B	A	H	H	A
2_23527	1	63.544	H	B	H	H	H	H	A	H	A	B	H	H	H	A	A	B	A	H	H	H	B	H	H	H	A	H	H	H	H	H	B	B	B	H	A	H	A	H	H	H	H	A	B	A	H	H	A
2_23528	1	63.544	H	B	H	H	H	H	A	H	A	B	H	H	H	A	A	B	A	H	H	H	B	H	H	H	A	H	H	H	H	H	B	B	B	H	A	H	A	H	H	H	H	A	B	A	H	H	A
2_26578	1	63.544	H	B	H	H	H	H	A	H	A	B	H	H	H	A	A	B	A	H	H	H	B	H	H	H	A	H	H	H	H	H	B	B	B	H	A	H	A	H	H	H	H	A	B	A	H	H	A
2_26579	1	63.544	H	B	H	H	H	H	A	H	A	B	H	H	H	A	A	B	A	H	H	H	B	H	H	H	A	H	H	H	H	H	B	B	B	H	A	H	A	H	H	H	H	A	B	A	H	H	A
2_26580	1	63.544	H	B	H	H	H	H	A	H	A	B	H	H	H	A	A	B	A	H	H	H	B	H	H	H	A	H	H	H	H	H	B	B	B	H	A	H	A	H	H	H	H	A	B	A	H	H	A
2_26679	1	63.544	H	B	H	H	H	H	A	H	A	B	H	H	H	A	A	B	A	H	H	H	B	H	H	H	A	H	H	H	H	H	B	B	B	H	A	H	A	H	H	H	H	A	B	A	H	H	A
2_32955	1	63.544	H	B	H	H	H	H	A	H	A	B	H	H	H	A	A	B	A	H	H	H	B	H	H	H	A	H	H	H	H	H	B	B	B	H	A	H	A	H	H	H	H	A	B	A	H	H	A
2_33170	1	63.544	H	B	H	H	H	H	A	H	A	B	H	H	H	A	A	B	A	H	H	H	B	H	H	H	A	H	H	H	H	H	B	B	B	H	A	H	A	H	H	H	H	A	B	A	H	H	A
2_33520	1	63.544	H	B	H	H	H	H	A	H	A	B	H	H	H	A	A	B	A	H	H	H	B	H	H	H	A	H	H	H	H	H	B	B	B	H	A	H	A	H	H	H	H	A	B	A	H	H	A
2_47454	1	63.544	H	B	H	H	H	H	A	H	A	B	H	H	H	A	A	B	A	H	H	H	B	H	H	H	A	H	H	H	H	H	B	B	B	H	A	H	A	H	H	H	H	A	B	A	H	H	A
1_0910	1	63.964	H	B	H	H	H	H	A	H	A	B	H	H	H	A	A	B	A	H	H	H	B	H	H	H	A	H	H	H	H	H	B	B	B	H	A	H	A	H	H	H	H	A	B	A	H	H	A
2_07231	1	63.964	H	B	H	H	H	H	A	H	A	B	H	H	H	A	A	B	A	H	H	H	B	H	H	H	A	H	H	H	H	H	B	B	B	H	A	H	A	H	H	H	H	A	B	A	H	H	A
2_26275	1	63.964	H	B	H	H	H	H	A	H	A	B	H	H	H	A	A	B	A	H	H	H	B	H	H	H	A	H	H	H	H	H	B	B	B	H	A	H	A	H	H	H	H	A	B	A	H	H	A
2_26276	1	63.964	H	-	H	H	H	H	A	H	A	B	H	H	H	A	A	B	A	H	H	H	B	H	H	H	A	H	H	H	H	H	B	B	B	H	A	H	A	H	H	H	H	A	B	A	H	H	A
2_06502	1	64.384	H	B	H	H	H	H	A	H	A	B	H	H	H	A	A	B	A	H	H	H	B	H	H	H	A	H	H	H	H	H	B	B	B	H	A	H	A	H	H	H	H	A	B	A	H	H	A
2_27146	1	64.384	H	B	H	H	H	H	A	H	A	B	H	H	H	A	A	B	A	H	H	H	B	H	H	H	A	H	H	H	H	H	B	B	B	H	A	H	A	H	H	H	H	A	B	A	H	H	A
2_27147	1	64.384	H	B	H	H	H	H	A	H	A	B	H	H	H	A	A	B	A	H	H	H	B	H	H	H	A	H	H	H	H	H	B	B	B	H	A	H	A	H	H	H	H	A	B	A	H	H	A
1_0992	1	64.804	H	B	H	B	H	H	A	H	A	B	H	H	H	A	A	B	A	H	H	H	B	H	H	H	A	H	H	H	H	H	B	B	B	H	A	H	A	H	H	H	H	A	B	A	H	H	A
2_08538	1	64.804	H	B	H	B	H	H	A	H	A	B	H	H	H	A	A	B	A	H	H	H	B	H	H	H	A	H	H	H	H	H	B	B	B	H	A	H	A	H	H	H	H	A	B	A	H	H	A
2_19060	1	64.804	H	B	H	B	H	H	A	H	A	B	H	H	H	A	A	B	A	H	H	H	B	H	H	H	A	H	H	H	H	H	B	B	B	H	A	H	A	H	H	H	H	A	B	A	H	H	A
2_19061	1	64.804	H	B	H	B	H	H	A	H	A	B	H	H	H	A	A	B	A	H	H	H	B	H	H	H	A	H	H	H	H	H	B	B	B	H	A	H	A	H	H	H	H	A	B	A	H	H	A
2_32768	1	64.804	H	B	H	B	H	H	A	H	A	B	H	H	H	A	A	B	A	H	H	H	B	H	H	H	A	H	H	H	H	H	B	B	B	H	A	H	A	H	H	H	H	A	B	A	H	H	A
2_40216	1	64.804	H	-	H	-	H	H	A	H	A	B	H	H	H	A	A	B	A	H	H	H	B	H	H	H	A	H	H	H	H	H	B	B	B	H	A	H	A	H	H	H	H	A	B	A	H	H	A
2_42795	1	64.804	H	B	H	B	H	H	A	H	A	B	H	H	H	A	A	B	A	H	H	H	B	H	H	H	A	H	H	H	H	H	B	B	B	H	A	H	A	H	H	H	H	A	B	A	H	H	A
2_05299	1	65.225	H	B	H	B	H	H	A	H	A	B	H	H	H	A	A	B	A	H	H	H	B	H	H	H	A	H	H	H	H	H	B	B	B	H	A	H	A	H	H	H	H	A	B	A	H	H	A
2_14293	1	65.225	H	B	H	B	H	H	A	H	A	B	H	H	H	A	A	B	A	H	H	H	B	H	H	H	A	H	H	H	H	H	B	B	B	H	A	H	A	H	H	H	H	A	B	A	H	H	A
2_15211	1	65.225	H	B	H	B	H	H	A	H	A	B	H	H	H	A	A	B	A	H	H	H	B	H	H	H	A	H	H	H	H	H	B	B	B	H	A	H	A	H	H	H	H	A	B	A	H	H	A
2_16279	1	65.225	H	B	H	B	H	H	A	H	A	B	H	H	H	A	A	B	A	H	H	H	B	H	H	H	A	H	H	H	H	H	B	B	B	H	A	H	A	H	H	H	H	A	B	A	H	H	A
2_19762	1	65.225	H	B	H	B	H	H	A	H	A	B	H	H	H	A	A	B	A	H	H	H	B	H	H	H	A	H	H	H	H	H	B	B	B	H	A	H	A	H	H	H	H	A	B	A	H	H	A
2_21894	1	65.225	H	B	H	B	H	H	A	H	A	B	H	H	H	A	A	B	A	H	H	H	B	H	H	H	A	H	H	H	H	H	B	B	B	H	A	H	A	H	H	H	H	A	B	A	H	H	A
2_24429	1	65.225	H	B	H	B	H	H	A	H	A	B	H	H	H	A	A	B	A	H	H	H	B	H	H	H	A	H	H	H	H	H	B	B	B	H	A	H	A	H	H	H	H	A	B	A	H	H	A
2_26988	1	65.225	H	B	H	B	H	H	A	H	A	B	H	H	H	A	A	B	A	H	H	H	B	H	H	H	A	H	H	H	H	H	B	B	B	H	A	H	A	H	H	H	H	A	B	A	H	H	A
2_27087	1	65.225	H	-	H	B	H	H	A	H	A	B	H	H	H	A	A	B	A	H	H	H	B	H	H	H	A	H	H	H	H	H	B	B	B	H	A	H	A	H	H	H	H	A	B	A	H	H	A
2_28558	1	65.225	H	B	H	B	H	H	A	H	A	B	H	H	H	A	A	B	A	H	H	H	B	H	H	H	A	H	H	H	H	H	B	B	B	H	A	H	A	H	H	H	H	A	B	A	H	H	A
2_30899	1	65.225	H	B	H	B	H	H	A	H	A	B	H	H	H	A	A	B	A	H	H	H	B	H	H	H	A	H	H	H	H	H	B	B	B	H	A	H	A	H	H	H	H	A	B	A	H	H	A
2_32409	1	65.225	H	B	H	B	H	H	A	H	A	B	H	H	H	A	A	B	A	H	H	H	B	H	H	H	A	H	H	H	H	H	B	B	B	H	A	H	A	H	H	H	H	A	B	A	H	H	A
2_33022	1	65.225	H	B	H	B	H	H	A	H	A	B	H	H	H	A	A	B	A	H	H	H	B	H	H	H	A	H	H	H	H	H	B	B	B	H	A	H	A	H	H	H	H	A	B	A	H	H	A
2_33216	1	65.225	H	B	H	B	H	H	A	H	A	B	H	H	H	A	A	B	A	H	H	H	B	H	H	H	A	H	H	H	H	H	B	B	B	H	A	H	A	H	H	H	H	A	B	A	H	H	A
2_33902	1	65.225	H	B	H	B	H	H	A	H	A	B	H	H	H	A	A	B	A	H	H	H	B	H	H	H	A	H	H	H	H	H	B	B	B	H	A	H	A	H	H	H	H	A	B	A	H	H	A
2_46329	1	65.225	H	B	H	B	H	H	A	H	A	B	H	H	H	A	A	B	A	H	H	H	B	H	H	H	A	H	H	H	H	H	B	B	B	H	A	H	A	H	H	H	H	A	B	A	H	H	A
2_27547	1	65.645	H	B	H	B	H	H	A	H	A	B	H	H	H	A	A	B	A	H	H	H	B	H	H	H	A	H	H	H	H	H	B	B	B	H	A	H	A	H	H	H	H	A	B	A	H	H	A
2_12809	1	66.065	H	B	H	B	H	H	A	H	A	B	H	H	H	A	A	B	A	H	H	H	B	H	H	H	A	H	H	H	H	H	B	B	B	H	A	H	A	H	H	H	H	A	B	A	H	H	A
2_12810	1	66.065	H	B	H	B	H	H	A	H	A	B	H	H	H	A	A	B	A	H	H	H	B	H	H	H	A	H	H	H	H	H	B	B	B	H	A	H	A	H	H	H	H	A	B	A	H	H	A
2_14222	1	66.065	H	B	H	B	H	H	A	H	A	B	H	H	H	A	A	B	A	H	H	H	B	H	H	H	A	H	H	H	H	H	B	B	B	H	A	H	A	H	H	H	H	A	B	A	H	H	A
2_15162	1	66.065	H	B	H	B	H	H	A	H	A	B	H	H	H	A	A	B	A	H	H	H	B	H	H	H	A	H	H	H	H	H	B	B	B	H	A	H	A	H	H	H	H	A	B	A	H	H	A
2_15193	1	66.065	H	B	H	B	H	H	A	H	A	B	H	H	H	A	A	B	A	H	H	H	B	H	H	H	A	H	H	H	H	H	B	B	B	H	A	H	A	H	H	H	H	A	B	A	H	H	A
2_15194	1	66.065	H	B	H	B	H	H	A	H	A	B	H	H	H	A	A	B	A	H	H	H	B	H	H	H	A	H	H	H	H	H	B	B	B	H	A	H	A	H	H	H	H	A	B	A	H	H	A
2_16411	1	66.065	H	B	H	B	H	H	A	H	A	B	H	H	H	A	A	B	A	H	H	H	B	H	H	H	A	H	H	H	H	H	B	B	B	H	A	H	A	H	H	H	H	A	B	A	H	H	A
2_17560	1	66.065	H	B	H	B	H	H	A	H	A	B	H	H	H	A	A	B	A	H	H	H	B	H	H	H	A	H	H	H	H	H	B	B	B	H	A	H	A	H	H	H	H	A	B	A	H	H	A
2_17561	1	66.065	H	B	H	B	H	H	A	H	A	B	H	H	H	A	A	B	A	H	H	H	B	H	H	H	A	H	H	H	H	H	B	B	B	H	A	H	A	H	H	H	H	A	B	A	H	H	A
2_19980	1	66.065	H	B	H	B	H	H	A	H	A	B	H	H	H	A	A	B	A	H	H	H	B	H	H	H	A	H	H	H	H	H	B	B	B	H	A	H	A	H	H	H	H	A	B	A	H	H	A
2_19981	1	66.065	H	B	H	B	H	H	A	H	A	B	H	H	H	A	A	B	A	H	H	H	B	H	H	H	A	H	H	H	H	H	B	B	B	H	A	H	A	H	H	H	H	A	B	A	H	H	A
2_20109	1	66.065	H	B	H	B	H	H	A	H	A	B	H	H	H	A	A	B	A	H	H	H	B	H	H	H	A	H	H	H	H	H	B	B	B	H	A	H	A	H	H	H	H	A	B	A	H	H	A
2_20110	1	66.065	H	B	H	B	H	H	A	H	-	B	H	H	H	A	A	B	A	H	H	H	B	H	H	H	A	H	H	H	H	H	B	B	B	H	A	H	A	H	H	H	H	A	B	A	H	H	A
2_20124	1	66.065	H	B	H	B	H	H	A	H	A	B	H	H	H	A	A	B	A	H	H	H	B	H	H	H	A	H	H	H	H	H	B	B	B	H	A	H	A	H	H	H	H	A	B	A	H	H	A
2_20125	1	66.065	H	B	H	B	H	H	A	H	A	B	H	H	H	A	A	B	A	H	H	H	B	H	H	H	A	H	H	H	H	H	B	B	B	H	A	H	A	H	H	H	H	A	B	A	H	H	A
2_20777	1	66.065	H	B	H	B	H	H	A	H	A	B	H	H	H	A	A	B	A	H	H	H	B	H	H	H	A	H	H	H	H	H	B	B	B	H	A	H	A	H	H	H	H	A	B	A	H	H	A
2_20778	1	66.065	H	B	H	B	H	H	A	H	A	B	H	H	H	A	A	B	A	H	H	H	B	H	H	H	A	H	H	H	H	H	B	B	B	H	A	H	A	H	H	H	H	A	B	A	H	H	A
2_21298	1	66.065	H	B	H	B	H	H	A	H	A	B	H	H	H	A	A	B	A	H	H	H	B	H	H	H	A	H	H	H	H	H	B	B	B	H	A	H	A	H	H	H	H	A	B	A	H	H	A
2_22184	1	66.065	H	B	H	B	H	H	A	H	-	B	H	H	H	A	A	B	A	H	H	H	B	H	H	H	A	H	H	H	H	H	B	B	B	H	A	H	A	H	H	H	H	A	B	A	H	H	A
2_22454	1	66.065	H	B	H	B	H	H	A	H	A	B	H	H	H	A	A	B	A	H	H	H	B	H	H	H	A	H	H	H	H	H	B	B	B	H	A	H	A	H	H	H	H	A	B	A	H	H	A
2_30518	1	66.065	H	B	H	B	H	H	A	H	A	B	H	H	H	A	A	B	A	H	H	H	B	H	H	H	A	H	H	H	H	H	B	B	B	H	A	H	A	H	H	H	H	A	B	A	H	H	A
2_31332	1	66.065	H	B	H	B	H	H	A	H	A	B	H	H	H	A	A	B	A	H	H	H	B	H	H	H	A	H	H	H	H	H	B	B	B	H	A	H	A	H	H	H	H	A	B	A	H	H	A
2_31333	1	66.065	H	B	H	B	H	H	A	H	A	B	H	H	H	A	A	B	A	H	H	H	B	H	H	H	A	H	H	H	H	H	B	B	B	H	A	H	A	H	H	H	H	A	B	A	H	H	A
2_31788	1	66.065	H	B	H	B	H	H	A	H	A	B	H	H	H	A	A	B	A	H	H	H	B	H	H	H	A	H	H	H	H	H	B	B	B	H	A	H	A	H	H	H	H	A	B	A	H	H	A
2_31789	1	66.065	H	B	H	B	H	H	A	H	A	B	H	H	H	A	A	B	A	H	H	H	B	H	H	H	A	H	H	H	H	H	B	B	B	H	A	H	A	H	H	H	H	A	B	A	H	H	A
2_32297	1	66.065	H	B	H	B	H	H	A	H	A	B	H	H	H	A	A	B	A	H	H	H	B	H	H	H	A	H	H	H	H	H	B	B	B	H	A	H	A	H	H	H	H	A	B	A	H	H	A
2_39075	1	66.065	H	B	H	B	H	H	A	H	A	B	H	H	H	A	A	B	A	H	H	H	B	H	H	H	A	H	H	H	H	H	B	B	B	H	A	H	A	H	H	H	H	A	B	A	H	H	A
2_40423	1	66.065	H	B	H	B	H	H	A	H	A	B	H	H	H	A	A	B	A	H	H	H	B	H	H	H	A	H	H	H	H	H	B	B	B	H	A	H	A	H	H	H	H	A	B	A	H	H	A
2_41492	1	66.065	H	B	H	B	H	H	A	H	A	B	H	H	H	A	A	B	A	H	H	H	B	H	H	H	A	H	H	H	H	H	B	B	B	H	A	H	A	H	H	H	H	A	B	A	H	H	A
2_41850	1	66.065	H	B	H	B	H	H	A	H	A	B	H	H	H	A	A	B	A	H	H	H	B	H	H	H	A	H	H	H	H	H	B	B	B	H	A	H	A	H	H	H	H	A	B	A	H	H	A
2_46376	1	66.065	H	B	H	B	H	H	A	H	A	B	H	H	H	A	A	B	A	H	H	H	B	H	H	H	A	H	H	H	H	H	B	B	B	H	A	H	A	H	H	H	H	A	B	A	H	H	A
2_55210	1	66.065	H	B	H	B	H	H	A	H	A	B	H	H	H	A	A	B	A	H	H	H	B	H	H	H	A	H	H	H	H	H	B	B	B	H	A	H	A	H	H	H	H	A	B	A	H	H	A
2_55295	1	66.065	H	B	H	B	H	H	A	H	A	B	H	H	H	A	A	B	A	H	H	H	B	H	H	H	A	H	H	H	H	H	B	B	B	H	A	H	A	H	H	H	H	A	B	A	H	H	A
2_08619	1	66.485	H	B	H	B	H	H	A	H	A	B	H	H	H	A	A	B	A	H	H	H	B	H	H	H	A	H	H	H	H	H	B	B	B	H	A	H	A	H	H	B	H	A	B	A	H	H	A
2_09061	1	66.905	H	B	H	B	H	H	A	H	A	B	H	H	H	A	A	B	A	H	H	H	B	H	H	H	A	H	H	H	H	H	B	B	B	H	A	H	A	H	H	B	H	A	B	A	H	H	A
2_09062	1	66.905	H	B	H	B	H	H	A	H	A	B	H	H	H	A	A	B	A	H	H	H	B	H	H	H	A	H	H	H	H	H	B	B	B	H	A	H	A	H	H	B	H	A	B	A	H	H	A
2_20858	1	66.905	H	B	H	B	H	H	A	H	A	B	H	H	H	A	A	B	A	H	H	H	B	H	H	H	A	H	H	H	H	H	B	B	B	H	A	H	A	H	H	B	H	A	B	A	H	H	A
2_29034	1	66.905	H	B	H	B	H	H	A	H	A	B	H	H	H	A	A	B	A	H	H	H	B	H	H	H	A	H	H	H	H	H	B	B	B	H	A	H	A	H	H	B	H	A	B	A	H	H	A
2_34066	1	66.905	H	B	H	B	H	H	A	H	A	B	H	H	H	A	A	B	A	H	H	H	B	H	H	H	A	H	H	H	H	H	B	B	B	H	A	H	A	H	H	B	H	A	B	A	H	H	A
1_0349	1	67.326	H	B	H	B	H	H	A	H	A	B	H	H	H	A	A	B	A	H	H	H	B	H	H	H	A	H	H	H	H	H	B	H	B	H	A	H	A	H	H	B	H	A	B	A	H	H	A
1_0417	1	67.326	H	B	H	B	H	H	A	H	A	B	H	H	H	A	A	B	A	H	H	H	B	H	H	H	A	H	H	H	H	H	B	H	B	H	A	H	A	H	H	B	H	A	B	A	H	H	A
2_06757	1	67.326	H	B	H	B	H	H	A	H	A	B	H	H	H	A	A	B	A	H	H	H	B	H	H	H	A	H	H	H	H	H	B	H	B	H	A	H	A	H	H	B	H	A	B	A	H	H	A
2_08409	1	67.326	H	B	H	B	H	H	A	H	A	B	H	H	H	A	A	B	A	H	H	H	B	H	H	H	A	H	H	H	H	H	B	H	B	H	A	H	A	H	H	B	H	A	B	A	H	H	A
2_09250	1	67.326	H	B	H	B	H	H	A	H	A	B	H	H	H	A	A	B	A	H	H	H	B	H	H	H	A	H	H	H	H	H	B	H	B	H	A	H	A	H	H	B	H	A	B	A	H	H	A
2_10462	1	67.326	H	B	H	B	H	H	A	H	A	B	H	H	H	A	A	B	A	H	H	H	B	H	H	H	A	H	H	H	H	H	B	H	B	H	A	H	A	H	H	B	H	A	B	A	H	H	A
2_14119	1	67.326	H	B	H	B	H	H	A	H	A	B	H	H	H	A	A	B	A	H	H	H	B	H	H	H	A	H	H	H	H	H	B	H	B	H	A	H	A	H	H	B	H	A	B	A	H	H	A
2_20163	1	67.326	H	B	H	B	H	H	A	H	A	B	H	H	H	A	A	B	A	H	H	H	B	H	H	H	A	H	H	H	H	H	B	H	B	H	A	H	A	H	H	B	H	A	B	A	H	H	A
2_22945	1	67.326	H	B	H	B	H	H	A	H	A	B	H	H	H	A	A	B	A	H	H	H	B	H	H	H	A	H	H	H	H	H	B	H	B	H	A	H	A	H	H	B	H	A	B	A	H	H	A
2_22946	1	67.326	H	B	H	B	H	H	A	H	A	B	H	H	H	A	A	B	A	H	H	H	B	H	H	H	A	H	H	H	H	H	B	H	B	H	A	H	A	H	H	B	H	A	B	A	H	H	A
2_23987	1	67.326	H	B	H	B	H	H	A	H	A	B	H	H	H	A	A	B	A	H	H	H	B	H	H	H	A	H	H	H	H	H	B	H	B	H	A	H	A	H	H	B	H	A	B	A	H	H	A
2_23988	1	67.326	H	B	H	B	H	H	A	H	A	B	H	H	H	A	A	B	A	H	H	H	B	H	H	H	A	H	H	H	H	H	B	H	B	H	A	H	A	H	H	B	H	A	B	A	H	H	A
2_24337	1	67.326	H	B	H	B	H	H	A	H	A	B	H	H	H	A	A	B	A	H	H	H	B	H	H	H	A	H	H	H	H	H	B	H	B	H	A	H	A	H	H	B	H	A	B	A	H	H	A
2_27222	1	67.326	H	B	H	B	H	H	A	H	A	B	H	H	H	A	A	B	A	H	H	H	B	H	H	H	A	H	H	H	H	H	B	H	B	H	A	H	A	H	H	B	H	A	B	A	H	H	A
2_30246	1	67.326	H	B	H	B	H	H	A	H	A	B	H	H	H	A	A	B	A	H	H	H	B	H	H	H	A	H	H	H	H	H	B	H	B	H	A	H	A	H	H	B	H	A	B	A	H	H	A
2_31236	1	67.326	H	B	H	B	H	H	A	H	A	B	H	H	H	A	A	B	A	H	H	H	B	H	H	H	A	H	H	H	H	H	B	H	B	H	A	H	A	H	H	B	H	A	B	A	H	H	A
2_10794	1	67.746	H	B	H	B	H	H	A	H	A	B	H	H	H	A	A	B	A	H	H	H	B	H	H	H	A	H	H	A	H	H	B	H	B	H	A	H	A	H	H	B	H	A	B	A	H	H	A
2_21246	1	67.746	H	B	H	B	H	H	A	H	A	B	H	H	H	A	A	B	A	H	H	H	B	H	H	H	A	H	H	A	H	H	B	H	B	H	A	H	A	H	H	B	H	A	B	A	H	H	A
2_21247	1	67.746	H	B	H	B	H	H	A	H	A	B	H	H	H	A	A	B	A	H	H	H	B	H	H	H	A	H	H	A	H	H	B	H	B	H	A	H	A	H	H	B	H	A	B	A	H	H	A
2_33134	1	67.746	H	B	H	B	H	H	A	H	A	B	H	H	H	A	A	B	A	H	H	H	B	H	H	H	A	H	H	A	H	H	B	H	B	H	A	H	A	H	H	B	H	A	B	A	H	H	A
2_24198	1	68.166	H	B	H	B	H	H	A	H	A	B	H	H	H	A	A	B	A	H	H	H	B	H	H	H	A	H	H	A	H	H	B	H	B	H	A	H	A	H	H	B	H	A	B	A	H	H	A
2_30116	1	68.586	H	B	H	B	H	H	A	H	A	B	H	H	H	A	A	H	A	H	H	H	B	H	H	H	A	H	H	A	H	H	B	H	B	H	A	H	A	H	H	B	H	A	B	A	H	H	A
2_33593	1	69.006	H	B	H	B	H	H	A	H	A	B	H	H	H	A	A	H	A	H	H	H	B	H	H	H	A	H	H	A	H	H	B	H	B	H	A	H	A	H	H	B	H	A	B	A	H	H	A
2_00719	1	69.847	H	-	H	-	H	H	A	B	A	B	H	H	H	A	H	H	A	H	H	H	B	H	H	H	A	H	H	A	H	H	B	H	B	H	A	H	A	H	H	B	H	A	B	A	H	H	A
2_04568	1	69.847	H	B	H	B	H	H	A	B	A	B	H	H	H	A	H	H	A	H	H	H	B	H	H	H	A	H	H	A	H	H	B	H	B	H	A	H	A	H	H	B	H	A	B	A	H	H	A
2_04569	1	69.847	H	B	H	B	H	H	A	B	A	B	H	H	H	A	H	H	A	H	H	H	B	H	H	H	A	H	H	A	H	H	B	H	B	H	A	H	A	H	H	B	H	A	B	A	H	H	A
2_08438	1	69.847	H	B	H	B	H	H	A	B	A	B	H	H	H	A	H	H	A	H	H	H	B	H	H	H	A	H	H	A	H	H	B	H	B	H	A	H	A	H	H	B	H	A	B	A	H	H	A
2_15778	1	69.847	H	B	H	B	H	H	A	B	A	B	H	H	H	A	H	H	A	H	H	H	B	H	H	H	A	H	H	A	H	H	B	H	B	H	A	H	A	H	H	B	H	A	B	A	H	H	A
2_30938	1	69.847	H	B	H	B	H	H	A	B	A	B	H	H	H	A	H	H	A	H	H	H	B	H	H	H	A	H	H	A	H	H	B	H	B	H	A	H	A	H	H	B	H	A	B	A	H	H	A
2_34563	1	69.847	H	B	H	B	H	H	A	B	A	B	H	H	H	A	H	H	A	H	H	H	B	H	H	H	A	H	H	A	H	H	B	H	B	H	A	H	A	H	H	B	H	A	B	A	H	H	A
2_47240	1	69.847	H	B	H	B	H	H	A	B	A	B	H	H	H	A	H	H	A	H	H	H	B	H	H	H	A	H	H	A	H	H	B	H	B	H	A	H	A	H	H	B	H	A	B	A	H	H	A
2_16051	1	70.687	H	B	H	B	H	H	A	B	A	B	H	H	H	A	H	H	A	H	H	H	B	H	H	H	H	H	H	A	H	H	B	H	B	H	A	H	A	H	H	B	H	A	B	A	H	H	A
2_35647	1	70.687	H	B	H	B	H	H	A	B	A	B	H	H	H	A	H	H	A	H	H	H	B	H	H	H	H	H	H	A	H	H	B	H	B	H	A	H	A	H	H	B	H	A	B	A	H	H	A
1_0699	1	71.107	H	B	H	B	H	H	A	B	A	B	H	H	H	A	H	H	A	H	H	H	B	H	H	H	H	H	H	A	H	H	B	H	B	H	A	H	A	H	H	B	H	A	B	A	H	H	A
2_03016	1	71.107	H	B	H	B	H	H	A	B	A	B	H	H	H	A	H	H	A	H	H	H	B	H	H	H	H	H	H	A	H	H	B	H	B	H	A	H	A	H	H	B	H	A	B	A	H	H	A
2_05111	1	71.107	H	B	H	B	H	H	A	B	A	B	H	H	H	A	H	H	A	H	H	H	B	H	H	H	H	H	H	A	H	H	B	H	B	H	A	H	A	H	H	B	H	A	B	A	H	H	A
2_07472	1	71.107	H	B	H	B	H	H	A	B	A	B	H	H	H	A	H	H	A	H	H	H	B	H	H	H	H	H	H	A	H	H	B	H	B	H	A	H	A	H	H	B	H	A	B	A	H	H	A
2_07473	1	71.107	H	B	H	B	H	H	A	B	A	B	H	H	H	A	H	H	A	H	H	H	B	H	H	H	H	H	H	A	H	H	B	H	B	H	A	H	A	H	H	B	H	A	B	A	H	H	A
2_10119	1	71.107	H	B	H	B	H	H	A	B	A	B	H	H	H	A	H	H	A	H	H	H	B	H	H	H	H	H	H	A	H	H	B	H	B	H	A	H	A	H	H	B	H	A	B	A	H	H	A
2_10120	1	71.107	H	B	H	B	H	H	A	B	A	B	H	H	H	A	H	H	A	H	H	H	B	H	H	H	H	H	H	A	H	H	B	H	B	H	A	H	A	H	H	B	H	A	B	A	H	H	A
2_14572	1	71.107	H	B	H	B	H	H	A	B	A	B	H	H	H	A	H	H	A	H	H	H	B	H	H	H	H	H	H	A	H	H	B	H	B	H	A	H	A	H	H	B	H	A	B	A	H	H	A
2_19334	1	71.107	H	B	H	B	H	H	A	B	A	B	H	H	H	A	H	H	A	H	H	H	B	H	H	H	H	H	H	A	H	H	B	H	B	H	A	H	A	H	H	B	H	A	B	A	H	H	A
2_20027	1	71.107	H	B	H	B	H	H	A	B	A	B	H	H	H	A	H	H	A	H	H	H	B	H	H	H	H	H	H	A	H	H	B	H	B	H	A	H	A	H	H	B	H	A	B	A	H	H	A
2_20210	1	71.107	H	B	H	B	H	H	A	B	A	B	H	H	H	A	H	H	A	H	H	H	B	H	H	H	H	H	H	A	H	H	B	H	B	H	A	H	A	H	H	B	H	A	B	A	H	H	A
2_21054	1	71.107	H	B	H	B	H	H	A	B	A	B	H	H	H	A	H	H	A	H	H	H	B	H	H	H	H	H	H	A	H	H	B	H	B	H	A	H	A	H	H	B	H	A	B	A	H	H	A
2_25250	1	71.107	H	B	H	B	H	H	A	B	A	B	H	H	H	A	H	H	A	H	H	H	B	H	H	H	H	H	H	A	H	H	B	H	B	H	A	H	A	H	H	B	H	A	B	A	H	H	A
2_25251	1	71.107	H	B	H	B	H	H	A	B	A	B	H	H	H	A	H	H	A	H	H	H	B	H	H	H	H	H	H	A	H	H	B	H	B	H	A	H	A	H	H	B	H	A	B	A	H	H	A
2_25252	1	71.107	H	B	H	B	H	H	A	B	A	B	H	H	H	A	H	H	A	H	H	H	B	H	H	H	H	H	H	A	H	H	B	H	B	H	A	H	A	H	H	B	H	A	B	A	H	H	A
2_25597	1	71.107	H	B	H	B	H	H	A	B	A	B	H	H	H	A	H	H	A	H	H	H	B	H	H	H	H	H	H	A	H	H	B	H	B	H	A	H	A	H	H	B	H	A	B	A	H	H	A
2_25751	1	71.107	H	B	H	B	H	H	A	B	A	B	H	H	H	A	H	H	A	H	H	H	B	H	H	H	H	H	H	A	H	H	B	H	B	H	A	H	A	H	H	B	H	A	B	A	H	H	A
2_25869	1	71.107	H	B	H	B	H	H	A	B	A	B	H	H	H	A	H	H	A	H	H	H	B	H	H	H	H	H	H	A	H	H	B	H	B	H	A	H	A	H	H	B	H	A	B	A	H	H	A
2_25870	1	71.107	H	B	H	B	H	H	A	B	A	B	H	H	H	A	H	H	A	H	H	H	B	H	H	H	H	H	H	A	H	H	B	H	B	H	A	H	A	H	H	B	H	A	B	A	H	H	A
2_25871	1	71.107	H	B	H	B	H	H	A	B	A	B	H	H	H	A	H	H	A	H	H	H	B	H	H	H	H	H	H	A	H	H	B	H	B	H	A	H	A	H	H	B	H	A	B	A	H	H	A
2_25872	1	71.107	H	B	H	B	H	H	A	B	A	B	H	H	H	A	H	H	A	H	H	H	B	H	H	H	H	H	H	A	H	H	B	H	B	H	A	H	A	H	H	B	H	A	B	A	H	H	A
2_26643	1	71.107	H	-	H	-	H	H	A	B	A	B	H	H	H	A	H	H	A	H	H	H	B	H	H	H	H	H	H	A	H	H	B	H	B	H	A	H	A	H	H	B	H	A	B	A	H	H	A
2_31037	1	71.107	H	B	H	B	H	H	A	B	A	B	H	H	H	A	H	H	A	H	H	H	B	H	H	H	H	H	H	A	H	H	B	H	B	H	A	H	A	H	H	B	H	A	B	A	H	H	A
2_31038	1	71.107	H	B	H	B	H	H	A	B	A	B	H	H	H	A	H	H	A	H	H	H	B	H	H	H	H	H	H	A	H	H	B	H	B	H	A	H	A	H	H	B	H	A	B	A	H	H	A
2_32510	1	71.107	H	B	H	B	H	H	A	B	A	B	H	H	H	A	H	H	A	H	H	H	B	H	H	H	H	H	H	A	H	H	B	H	B	H	A	H	A	H	H	B	H	A	B	A	H	H	A
2_46152	1	71.107	H	B	H	B	H	H	A	B	A	B	H	H	H	A	H	H	A	H	H	H	B	H	H	H	H	H	H	A	H	H	B	H	B	H	A	H	A	H	H	B	H	A	B	A	H	H	A
2_51283	1	71.107	H	B	H	B	H	H	A	B	A	B	H	H	H	A	H	H	A	H	H	H	B	H	H	H	H	H	H	A	H	H	B	H	B	H	A	H	A	H	H	B	H	A	B	A	H	H	A
2_54371	1	71.107	H	B	H	B	H	H	A	B	A	B	H	H	H	A	H	H	A	H	H	H	B	H	H	H	H	H	H	A	H	H	B	H	B	H	A	H	A	H	H	B	H	A	B	A	H	H	A
1_0804	1	71.527	H	B	H	B	H	H	A	B	A	B	H	H	H	A	H	H	A	H	H	H	B	H	H	H	H	H	H	A	H	H	B	H	B	H	A	H	A	H	H	B	H	A	B	A	H	H	A
2_03308	1	71.527	H	B	H	B	H	H	A	B	A	B	H	H	H	A	H	H	A	H	H	H	B	H	H	H	H	H	H	A	H	H	B	H	B	H	A	H	A	H	H	B	H	A	B	A	H	H	A
2_03339	1	71.527	H	B	H	B	H	H	A	B	A	B	H	H	H	A	H	H	A	H	H	H	B	H	H	H	H	H	H	A	H	H	B	H	B	H	A	H	A	H	H	B	H	A	B	A	H	H	A
2_06073	1	71.527	H	B	H	B	H	H	A	B	A	B	H	H	H	A	H	H	A	H	H	H	B	H	H	H	H	H	H	A	H	H	B	H	B	H	A	H	A	H	H	B	H	A	B	A	H	H	A
2_06513	1	71.527	H	B	H	B	H	H	A	B	A	B	H	H	H	A	H	H	A	H	H	H	B	H	H	H	H	H	H	A	H	H	B	H	B	H	A	H	A	H	H	B	H	A	B	A	H	H	A
2_07785	1	71.527	H	B	H	B	H	H	A	B	A	B	H	H	H	A	H	H	A	H	H	H	B	H	H	H	H	H	H	A	H	H	B	H	B	H	A	H	A	H	H	B	H	A	B	A	H	H	A
2_07786	1	71.527	H	B	H	B	H	H	A	B	A	B	H	H	H	A	H	H	A	H	H	H	B	H	H	H	H	H	H	A	H	H	B	H	B	H	A	H	A	H	H	B	H	A	B	A	H	H	A
2_07788	1	71.527	H	B	H	B	H	H	A	B	A	B	H	H	H	A	H	H	A	H	H	H	B	H	H	H	H	H	H	A	H	H	B	H	B	H	A	H	A	H	H	B	H	A	B	A	H	H	A
2_08014	1	71.527	H	B	H	B	H	H	A	B	A	B	H	H	H	A	H	H	A	H	H	H	B	H	H	H	H	H	H	A	H	H	B	H	B	H	A	H	A	H	H	B	H	A	B	A	H	H	A
2_08923	1	71.527	H	B	H	B	H	H	A	B	A	B	H	H	H	A	H	H	A	H	H	H	B	H	H	H	H	H	H	A	H	H	B	H	B	H	A	H	A	H	H	B	H	A	B	A	H	H	A
2_11137	1	71.527	H	B	H	B	H	H	A	B	A	B	H	H	H	A	H	H	A	H	H	H	B	H	H	H	H	H	H	A	H	H	B	H	B	H	A	H	A	H	H	B	H	A	B	A	H	H	A
2_12104	1	71.527	H	B	H	B	H	H	A	B	A	B	H	H	H	A	H	H	A	H	H	H	B	H	H	H	H	H	H	A	H	H	B	H	B	H	A	H	A	H	H	B	H	A	B	A	H	H	A
2_14973	1	71.527	H	B	H	B	H	H	A	B	A	B	H	H	H	A	H	H	A	H	H	H	B	H	H	H	H	H	H	A	H	H	B	H	B	H	A	H	A	H	H	B	H	A	B	A	H	H	A
2_14974	1	71.527	H	B	H	B	H	H	A	B	A	B	H	H	H	A	H	H	A	H	H	H	B	H	H	H	H	H	H	A	H	H	B	H	B	H	A	H	A	H	H	B	H	A	B	A	H	H	A
2_22816	1	71.527	H	B	H	B	H	H	A	B	A	B	H	H	H	A	H	H	A	H	H	H	B	H	H	H	H	H	H	A	H	H	B	H	B	H	A	H	A	H	H	B	H	A	B	A	H	H	A
2_26787	1	71.527	H	B	H	B	H	H	A	B	A	B	H	H	H	A	H	H	A	H	H	H	B	H	H	H	H	H	H	A	H	H	B	H	B	H	A	H	A	H	H	B	H	A	B	A	H	H	A
2_27999	1	71.527	H	B	H	B	H	H	A	B	A	B	H	H	H	A	H	H	A	H	H	H	B	H	H	H	H	H	H	A	H	H	B	H	B	H	A	H	A	H	H	B	H	A	B	A	H	H	A
2_32657	1	71.527	H	B	H	B	H	H	A	B	A	B	H	H	H	A	H	H	A	H	H	H	B	H	H	H	H	H	H	A	H	H	B	H	B	H	A	H	A	H	H	B	H	A	B	A	H	H	A
2_32809	1	71.527	H	B	H	B	H	H	A	B	A	B	H	H	H	A	H	H	A	H	H	H	B	H	H	H	H	H	H	A	H	H	B	H	B	H	A	H	A	H	H	B	H	A	B	A	H	H	A
2_32810	1	71.527	H	B	H	B	H	H	A	B	A	B	H	H	H	A	H	H	A	H	H	H	B	H	H	H	H	H	H	A	H	H	B	H	B	H	A	H	A	H	H	B	H	A	B	A	H	H	A
2_33947	1	71.527	H	B	H	B	H	H	A	B	A	B	H	H	H	A	H	H	A	H	H	H	B	H	H	H	H	H	H	A	H	H	B	H	B	H	A	H	A	H	H	B	H	A	B	A	H	H	A
2_33948	1	71.527	H	B	H	B	H	H	A	B	A	B	H	H	H	A	H	H	A	H	H	H	B	H	H	H	H	H	H	A	H	H	B	H	B	H	A	H	A	H	H	B	H	A	B	A	H	H	A
2_37790	1	71.527	H	B	H	B	H	H	A	B	A	B	H	H	H	A	H	H	A	H	H	H	B	H	H	H	H	H	H	A	H	H	B	H	B	H	A	H	A	H	H	B	H	A	B	A	H	H	A
2_52918	1	71.527	H	B	H	B	H	H	-	B	-	B	H	H	H	A	H	H	A	H	H	H	B	H	H	H	H	H	H	A	H	H	B	H	B	H	A	H	A	H	H	B	H	-	B	A	H	H	A
2_24101	1	71.948	H	B	H	B	H	H	A	B	A	B	H	H	H	A	H	H	A	H	H	H	B	H	H	H	H	H	H	A	H	H	B	H	B	H	A	H	A	H	H	H	H	A	B	A	H	H	A
2_31963	1	71.948	H	B	H	B	H	H	A	B	A	B	H	H	H	A	H	H	A	H	H	H	B	H	H	H	H	H	H	A	H	H	B	H	B	H	A	H	A	H	H	H	H	A	B	A	H	H	A
2_06079	1	73.629	H	B	H	B	H	H	A	B	A	B	H	H	H	A	H	H	A	H	H	H	B	H	H	H	H	H	H	A	H	H	B	H	B	H	A	H	A	H	H	H	H	A	B	A	H	H	A
2_13066	1	73.629	H	B	H	B	H	H	A	B	A	B	H	H	H	A	H	H	A	H	H	H	B	H	H	H	H	H	H	A	H	H	B	H	B	H	A	H	A	H	H	H	H	A	B	A	H	H	A
2_15347	1	73.629	H	B	H	B	H	H	A	B	A	B	H	H	H	A	H	H	A	H	H	H	B	H	H	H	H	H	H	A	H	H	B	H	B	H	A	H	A	H	H	H	H	A	B	A	H	H	A
2_19490	1	73.629	H	B	H	B	H	H	A	B	A	B	H	H	H	A	H	H	A	H	H	H	B	H	H	H	H	H	H	A	H	H	B	H	B	H	A	H	A	H	H	H	H	A	B	A	H	H	A
2_29304	1	73.629	H	B	H	B	H	H	A	B	A	B	H	H	H	A	H	H	A	H	H	H	B	H	H	H	H	H	H	A	H	H	B	H	B	H	A	H	A	H	H	H	H	A	B	A	H	H	A
2_30949	1	73.629	H	B	H	B	H	H	A	B	A	B	H	H	H	A	H	H	A	H	H	H	B	H	H	H	H	H	H	A	H	H	B	H	B	H	A	H	A	H	H	H	H	A	B	A	H	H	A
2_34456	1	73.629	H	B	H	B	H	H	A	B	A	B	H	H	H	A	H	H	A	H	H	H	B	H	H	H	H	H	H	A	H	H	B	H	B	H	A	H	A	H	H	H	H	A	B	A	H	H	A
2_37156	1	74.049	H	B	H	B	H	H	A	B	A	B	H	H	H	A	H	H	A	H	H	H	B	H	H	H	H	H	H	A	H	H	B	H	B	H	A	H	A	H	H	H	H	A	B	A	H	H	A
2_45137	1	74.889	H	B	H	B	H	H	A	B	A	B	H	H	H	A	H	H	A	H	H	H	B	H	H	H	H	H	H	A	H	H	B	H	B	H	A	H	A	H	H	H	H	A	B	A	H	H	A
2_49728	1	74.889	H	B	H	B	H	H	A	B	A	B	H	H	H	A	H	H	A	H	H	H	B	H	H	H	H	H	H	A	H	H	B	H	B	H	A	H	A	H	H	H	H	A	B	A	H	H	A
2_13572	1	75.31	H	B	H	B	H	H	A	B	A	B	H	H	H	A	H	H	A	H	H	H	B	H	H	H	H	H	H	A	H	H	B	H	B	H	A	H	A	H	H	H	H	A	B	A	H	H	A
2_23656	1	75.73	H	B	H	B	H	H	A	B	A	B	H	H	H	A	H	H	A	H	H	H	B	H	H	H	H	H	H	A	H	H	B	H	B	H	A	H	A	H	H	H	H	A	B	A	H	H	A
1_0304	1	78.337	H	B	H	B	B	H	A	B	A	B	H	H	H	A	H	H	A	H	H	H	B	H	H	H	H	A	H	A	H	H	B	H	B	H	A	H	A	H	H	H	H	A	B	H	H	H	A
2_00709	1	78.337	H	B	H	B	B	H	A	B	A	B	H	H	H	A	H	H	A	H	H	H	B	H	H	H	H	A	H	A	H	H	B	H	B	H	A	H	A	H	H	H	H	A	B	H	H	H	A
2_00710	1	78.337	H	B	H	B	B	H	A	B	A	B	H	H	H	A	H	H	A	H	H	H	B	H	H	H	H	A	H	A	H	H	B	H	B	H	A	H	A	H	H	H	H	A	B	H	H	H	A
2_03364	1	78.337	H	B	H	B	B	H	A	B	A	B	H	H	H	A	H	H	A	H	H	H	B	H	H	H	H	A	H	A	H	H	B	H	B	H	A	H	A	H	H	H	H	A	B	H	H	H	A
2_03366	1	78.337	H	B	H	B	B	H	A	B	A	B	H	H	H	A	H	H	A	H	H	H	B	H	H	H	H	A	H	A	H	H	B	H	B	H	A	H	A	H	H	H	H	A	B	H	H	H	A
2_03367	1	78.337	H	B	H	B	B	H	A	B	A	B	H	H	H	A	H	H	A	H	H	H	B	H	H	H	H	A	H	A	H	H	B	H	B	H	A	H	A	H	H	H	H	A	B	H	H	H	A
2_07171	1	78.337	H	B	H	B	B	H	A	B	A	B	H	H	H	A	H	H	A	H	H	H	B	H	H	H	H	A	H	A	H	H	B	H	B	H	A	H	A	H	H	H	H	A	B	H	H	H	A
2_23779	1	78.337	H	B	H	B	B	H	A	B	A	B	H	H	H	A	H	H	A	H	H	H	B	H	H	H	H	A	H	A	H	H	B	H	B	H	A	H	A	H	H	H	H	A	B	H	H	H	A
2_23780	1	78.337	H	B	H	B	B	H	A	B	A	B	H	H	H	A	H	H	A	H	H	H	B	H	H	H	H	A	H	A	H	H	B	H	B	H	A	H	A	H	H	H	H	A	B	H	H	H	A
2_29459	1	78.337	H	B	H	B	B	H	A	B	A	B	H	H	H	A	H	H	A	H	H	H	B	H	H	H	H	A	H	A	H	H	B	H	B	H	A	H	A	H	H	H	H	A	B	H	H	H	A
2_31514	1	78.337	H	B	H	B	B	H	A	B	A	B	H	H	H	A	H	H	A	H	H	H	B	H	H	H	H	A	H	A	H	H	B	H	B	H	A	H	A	H	H	H	H	A	B	H	H	H	A
2_34571	1	78.337	H	B	H	B	B	H	A	B	A	B	H	H	H	A	H	H	A	H	H	H	B	H	H	H	H	A	H	A	H	H	B	H	B	H	A	H	A	H	H	H	H	A	B	H	H	H	A
2_48787	1	78.337	H	B	H	B	B	H	A	B	A	B	H	H	H	A	H	H	A	H	H	H	B	H	H	H	H	A	H	A	H	H	B	H	B	H	A	H	A	H	H	H	H	A	B	H	H	H	A
2_09519	1	78.757	H	B	H	B	B	-	A	B	A	-	H	H	H	A	H	H	A	-	H	H	B	H	H	H	H	A	H	A	H	H	B	H	B	H	A	A	A	H	H	H	H	A	B	H	H	H	A
1_0200	1	80.102	H	B	H	B	B	H	A	B	A	B	H	H	H	A	H	A	A	H	H	H	B	H	H	H	H	A	H	A	H	H	B	H	B	H	A	H	A	H	H	H	H	A	B	H	H	H	A
1_0746	1	80.102	H	B	H	B	B	H	A	B	A	B	H	H	H	A	H	A	A	H	H	H	B	H	H	H	H	A	H	A	H	H	B	H	B	H	A	H	A	H	H	H	H	A	B	H	H	H	A
2_00580	1	80.102	H	B	H	B	B	H	A	B	A	B	H	H	H	A	H	A	A	H	H	H	B	H	H	H	H	A	H	A	H	H	B	H	B	H	A	H	A	H	H	H	H	A	B	H	H	H	A
2_02779	1	80.102	H	B	H	B	B	H	A	B	A	B	H	H	H	A	H	A	A	H	H	H	B	H	H	H	H	A	H	A	H	H	B	H	B	H	A	H	A	H	H	H	H	A	B	H	H	H	A
2_03017	1	80.102	H	B	H	B	B	H	A	B	A	B	H	H	H	A	H	A	A	H	H	H	B	H	H	H	H	A	H	A	H	H	B	H	B	H	A	H	A	H	H	H	H	A	B	H	H	H	A
2_03018	1	80.102	H	B	H	B	B	H	A	B	A	B	H	H	H	A	H	A	A	H	H	H	B	H	H	H	H	A	H	A	H	H	B	H	B	H	A	H	A	H	H	H	H	A	B	H	H	H	A
2_07428	1	80.102	H	B	H	B	B	H	A	B	A	B	H	H	H	A	H	A	A	H	H	H	B	H	H	H	H	A	H	A	H	H	B	H	B	H	A	H	A	H	H	H	H	A	B	H	H	H	A
2_16196	1	80.102	H	B	H	B	B	H	A	B	A	B	H	H	H	A	H	A	A	H	H	H	B	H	H	H	H	A	H	A	H	H	B	H	B	H	A	H	A	H	H	H	H	A	B	H	H	H	A
2_18661	1	80.102	H	B	H	B	B	H	A	B	A	B	H	H	H	A	H	A	A	H	H	H	B	H	H	H	H	A	H	A	H	H	B	H	B	H	A	H	A	H	H	H	H	A	B	H	H	H	A
2_19472	1	80.102	H	B	H	B	B	H	A	B	A	B	H	H	H	A	H	A	A	H	H	H	B	H	H	H	H	A	H	A	H	H	B	H	B	H	A	H	A	H	H	H	H	A	B	H	H	H	A
2_21909	1	80.102	H	B	H	B	B	H	A	B	A	B	H	H	H	A	H	A	A	H	H	H	B	H	H	H	H	A	H	A	H	H	B	H	B	H	A	H	A	H	H	H	H	A	B	H	H	H	A
2_21910	1	80.102	H	B	H	B	B	H	A	B	A	B	H	H	H	A	H	A	A	H	H	H	B	H	H	H	H	A	H	A	H	H	B	H	B	H	A	H	A	H	H	H	H	A	B	H	H	H	A
2_27436	1	80.102	H	B	H	B	B	H	A	B	A	B	H	H	H	A	H	A	A	H	H	H	B	H	H	H	H	A	H	A	H	H	B	H	B	H	A	H	A	H	H	H	H	A	B	H	H	H	A
2_27458	1	80.102	H	B	H	B	B	H	A	B	A	B	H	H	H	A	H	A	A	H	H	H	B	H	H	H	H	A	H	A	H	H	B	H	B	H	A	H	A	H	H	H	H	A	B	H	H	H	A
2_30939	1	80.102	H	B	H	B	B	H	A	B	A	B	H	H	H	A	H	A	A	H	H	H	B	H	H	H	H	A	H	A	H	H	B	H	B	H	A	H	A	H	H	H	H	A	B	H	H	H	A
1_0508	1	80.522	H	B	H	B	B	H	A	B	A	B	H	H	H	A	H	A	A	H	H	H	B	H	H	H	H	A	B	A	H	H	B	H	B	H	A	H	A	H	H	H	H	A	B	H	H	H	A
1_1319	1	80.522	H	B	H	B	B	H	A	B	A	B	H	H	H	A	H	A	A	H	H	H	B	H	H	H	H	A	B	A	H	H	B	H	B	H	A	H	A	H	H	H	H	A	B	H	H	H	A
2_00631	1	80.522	H	B	H	B	B	H	A	B	A	B	H	H	H	A	H	A	A	H	H	H	B	H	H	H	H	A	B	A	H	H	B	H	B	H	A	H	A	H	H	H	H	A	B	H	H	H	A
2_00632	1	80.522	H	B	H	B	B	H	A	B	A	B	H	H	H	A	H	A	A	H	H	H	B	H	H	H	H	A	B	A	H	H	B	H	B	H	A	H	A	H	H	H	H	A	B	H	H	H	A
2_01658	1	80.522	H	B	H	B	B	H	A	B	A	B	H	H	H	A	H	A	A	H	H	H	B	H	H	H	H	A	B	A	H	H	B	H	B	H	A	H	A	H	H	H	H	A	B	H	H	H	A
2_03025	1	80.522	H	B	H	B	B	H	A	B	A	B	H	H	H	A	H	A	A	H	H	H	B	H	H	H	H	A	B	A	H	H	B	H	B	H	A	H	A	H	H	H	H	A	B	H	H	H	A
2_03026	1	80.522	H	B	H	B	B	H	A	B	A	B	H	H	H	A	H	A	A	H	H	H	B	H	H	H	H	A	B	A	H	H	B	H	B	H	A	H	A	H	H	H	H	A	B	H	H	H	A
2_04537	1	80.522	H	B	H	B	B	H	A	B	A	B	H	H	H	A	H	A	A	H	H	H	B	H	H	H	H	A	B	A	H	H	B	H	B	H	A	H	A	H	H	H	H	A	B	H	H	H	A
2_04538	1	80.522	H	B	H	B	B	H	A	B	A	B	H	H	H	A	H	A	A	H	H	H	B	H	H	H	H	A	B	A	H	H	B	H	B	H	A	H	A	H	H	H	H	A	B	H	H	H	A
2_08968	1	80.522	H	B	H	B	B	H	A	B	A	B	H	H	H	A	H	A	A	H	H	H	B	H	H	H	H	A	B	A	H	H	B	H	B	H	A	H	A	H	H	H	H	A	B	H	H	H	A
2_08969	1	80.522	H	B	H	B	B	H	A	B	A	B	H	H	H	A	H	A	A	H	H	H	B	H	H	H	H	A	B	A	H	H	B	H	B	H	A	H	A	H	H	H	H	A	B	H	H	H	A
2_09412	1	80.522	H	B	H	B	B	H	A	B	A	B	H	H	H	A	H	A	A	H	H	H	B	H	H	H	H	A	B	A	H	H	B	H	B	H	A	H	A	H	H	H	H	A	B	H	H	H	A
2_09413	1	80.522	H	B	H	B	B	H	A	B	A	B	H	H	H	A	H	A	A	H	H	H	B	H	H	H	H	A	B	A	H	H	B	H	B	H	A	H	A	H	H	H	H	A	B	H	H	H	A
2_10870	1	80.522	H	B	H	B	B	H	A	B	A	B	H	H	H	A	H	A	A	H	H	H	B	H	H	H	H	A	B	A	H	H	B	H	B	H	A	H	A	H	H	H	H	A	B	H	H	H	A
2_11295	1	80.522	H	B	H	B	B	H	A	B	A	B	H	H	H	A	H	A	A	H	H	H	B	H	H	H	H	A	B	A	H	H	B	H	B	H	A	H	A	H	H	H	H	A	B	H	H	H	A
2_11297	1	80.522	H	B	H	B	B	H	A	B	A	B	H	H	H	A	H	A	A	H	H	H	B	H	H	H	H	A	B	A	H	H	B	H	B	H	A	H	A	H	H	H	H	A	B	H	H	H	A
2_13003	1	80.522	H	B	H	B	B	H	A	B	A	B	H	H	H	A	H	A	A	H	H	H	B	H	H	H	H	A	B	A	H	H	B	H	B	H	A	H	A	H	H	H	H	A	B	H	H	H	A
2_14784	1	80.522	H	B	H	B	B	H	A	B	A	B	H	H	H	A	H	A	A	H	H	H	B	H	H	H	H	A	B	A	H	H	B	H	B	H	A	H	A	H	H	H	H	A	B	H	H	H	A
2_16199	1	80.522	H	B	H	B	B	H	A	B	A	B	H	H	H	A	H	A	A	H	H	H	B	H	H	H	H	A	B	A	H	H	B	H	B	H	A	H	A	H	H	H	H	A	B	H	H	H	A
2_19698	1	80.522	H	B	H	B	B	H	A	B	A	B	H	H	H	A	H	A	A	H	H	H	B	H	H	H	H	A	B	A	H	H	B	H	B	H	A	H	A	H	H	H	H	A	B	H	H	H	A
2_20199	1	80.522	H	B	H	B	B	H	A	B	A	B	H	H	H	A	H	A	A	H	H	H	B	H	H	H	H	A	B	A	H	H	B	H	B	H	A	H	A	H	H	H	H	A	B	H	H	H	A
2_20435	1	80.522	H	B	H	B	B	H	A	B	A	B	H	H	H	A	H	A	A	H	H	H	B	H	H	H	H	A	B	A	H	H	B	H	B	H	A	H	A	H	H	H	H	A	B	H	H	H	A
2_20864	1	80.522	H	B	H	B	B	H	A	B	A	B	H	H	H	A	H	A	A	H	H	H	B	H	H	H	H	A	B	A	H	H	B	H	B	H	A	H	A	H	H	H	H	A	B	H	H	H	A
2_21654	1	80.522	H	B	H	B	B	H	A	B	A	B	H	H	H	A	H	A	A	H	H	H	B	H	H	H	H	A	B	A	H	H	B	H	B	H	A	H	A	H	H	H	H	A	B	H	H	H	A
2_21655	1	80.522	H	B	H	B	B	H	A	B	A	B	H	H	H	A	H	A	A	H	H	H	B	H	H	H	H	A	B	A	H	H	B	H	B	H	A	H	A	H	H	H	H	A	B	H	H	H	A
2_23460	1	80.522	H	B	H	B	B	H	A	B	A	B	H	H	H	A	H	A	A	H	H	H	B	H	H	H	H	A	B	A	H	H	B	H	B	H	A	H	A	H	H	H	H	A	B	H	H	H	A
2_24704	1	80.522	H	B	H	B	B	H	A	B	A	B	H	H	H	A	H	A	A	H	H	H	B	H	H	H	H	A	B	A	H	H	B	H	B	H	A	H	A	H	H	H	H	A	B	H	H	H	A
2_25164	1	80.522	H	B	H	B	B	H	A	B	A	B	H	H	H	A	H	A	A	H	H	H	B	H	H	H	H	A	B	A	H	H	B	H	B	H	A	H	A	H	H	H	H	A	B	H	H	H	A
2_28791	1	80.522	H	B	H	B	B	H	A	B	A	B	H	H	H	A	H	A	A	H	H	H	B	H	H	H	H	A	B	A	H	H	B	H	B	H	A	H	A	H	H	H	H	A	B	H	H	H	A
2_31006	1	80.522	H	B	H	B	B	H	A	B	A	B	H	H	H	A	H	A	A	H	H	H	B	H	H	H	H	A	B	A	H	H	B	H	B	H	A	H	A	H	H	H	H	A	B	H	H	H	A
2_49447	1	80.522	H	B	H	B	B	H	A	B	A	B	H	H	H	A	H	A	A	H	H	H	B	H	H	H	H	A	B	A	H	H	B	H	B	H	A	H	A	H	H	H	H	A	B	H	H	H	A
1_0122	1	80.943	H	B	H	B	B	H	A	B	A	B	H	H	H	A	H	A	A	H	H	H	B	H	H	H	H	A	B	A	H	H	B	H	B	H	A	H	A	H	H	H	H	A	B	H	H	H	A
1_0267	1	80.943	H	B	H	B	B	H	A	B	A	B	H	H	H	A	H	A	A	H	H	H	B	H	H	H	H	A	B	A	H	H	B	H	B	H	A	H	A	H	H	H	H	A	B	H	H	H	A
1_0875	1	80.943	H	B	H	B	B	H	A	B	A	B	H	H	H	A	H	A	A	H	H	H	B	H	H	H	H	A	B	A	H	H	B	H	B	H	A	H	A	H	H	H	H	A	B	H	H	H	A
1_1146	1	80.943	H	B	H	B	B	H	A	B	A	B	H	H	H	A	H	A	A	H	H	H	B	H	H	H	H	A	B	A	H	H	B	H	B	H	A	H	A	H	H	H	H	A	B	H	H	H	A
2_03800	1	80.943	H	B	H	B	B	H	A	B	A	B	H	H	H	A	H	A	A	H	H	H	B	H	H	H	H	A	B	A	H	H	B	H	B	H	A	H	A	H	H	H	H	A	B	H	H	H	A
2_04204	1	80.943	H	B	H	B	B	H	A	B	A	B	H	H	H	A	H	A	A	H	H	H	B	H	H	H	H	A	B	A	H	H	B	H	B	H	A	H	A	H	H	H	H	A	B	H	H	H	A
2_05759	1	80.943	H	B	H	B	B	H	A	B	A	B	H	H	H	A	H	A	A	H	H	H	B	H	H	H	H	A	B	A	H	H	B	H	B	H	A	H	A	H	H	H	H	A	B	H	H	H	A
2_05760	1	80.943	H	B	H	B	B	H	A	B	A	B	H	H	H	A	H	A	A	H	H	H	B	H	H	H	H	A	B	A	H	H	B	H	B	H	A	H	A	H	H	H	H	A	B	H	H	H	A
2_10320	1	80.943	H	B	H	B	B	H	A	B	A	B	H	H	H	A	H	A	A	H	H	H	B	H	H	H	H	A	B	A	H	H	B	H	B	H	A	H	A	H	H	H	H	A	B	H	H	H	A
2_10867	1	80.943	H	B	H	B	B	H	A	B	A	B	H	H	H	A	H	A	A	H	H	H	B	H	H	H	H	A	B	A	H	H	B	H	B	H	A	H	A	H	H	H	H	A	B	H	H	H	A
2_10868	1	80.943	H	B	H	B	B	H	A	B	A	B	H	H	H	A	H	A	A	H	H	H	B	H	H	H	H	A	B	A	H	H	B	H	B	H	A	H	A	H	H	H	H	A	B	H	H	H	A
2_11421	1	80.943	H	B	H	B	B	H	A	B	A	B	H	H	H	A	H	A	A	H	H	H	B	H	H	H	H	A	B	A	H	H	B	H	B	H	A	H	A	H	H	H	H	A	B	H	H	H	A
2_11422	1	80.943	H	B	H	B	B	H	A	B	A	B	H	H	H	A	H	A	A	H	H	H	B	H	H	H	H	A	B	A	H	H	B	H	B	H	A	H	A	H	H	H	H	A	B	H	H	H	A
2_11516	1	80.943	H	B	H	B	B	H	A	B	A	B	H	H	H	A	H	A	A	H	H	H	B	H	H	H	H	A	B	A	H	H	B	H	B	H	A	H	A	H	H	H	H	A	B	H	H	H	A
2_11517	1	80.943	H	-	H	B	-	H	A	B	A	B	H	H	H	A	H	A	A	H	H	H	B	H	H	H	H	A	B	A	H	H	B	H	B	H	A	H	A	H	H	H	H	A	B	H	H	H	A
2_12726	1	80.943	H	B	H	B	B	H	A	B	A	B	H	H	H	A	H	A	A	H	H	H	B	H	H	H	H	A	B	A	H	H	B	H	B	H	A	H	A	H	H	H	H	A	B	H	H	H	A
2_12747	1	80.943	H	B	H	B	B	H	A	B	A	B	H	H	H	A	H	A	A	H	H	H	B	H	H	H	H	A	B	A	H	H	B	H	B	H	A	H	A	H	H	H	H	A	B	H	H	H	A
2_12748	1	80.943	H	B	H	B	B	H	A	B	A	B	H	H	H	A	H	A	A	H	H	H	B	H	H	H	H	A	B	A	H	H	B	H	B	H	A	H	A	H	H	H	H	A	B	H	H	H	A
2_16173	1	80.943	H	B	H	B	B	H	A	B	A	B	H	H	H	A	H	A	A	H	H	H	B	H	H	H	H	A	B	A	H	H	B	H	B	H	A	H	A	H	H	H	H	A	B	H	H	H	A
2_16895	1	80.943	H	B	H	B	B	-	A	B	A	B	-	H	H	A	H	A	A	H	H	H	B	H	-	H	H	A	B	A	H	H	B	H	B	H	A	H	A	-	H	H	H	A	B	H	H	H	A
2_16897	1	80.943	H	B	H	B	B	H	A	B	A	B	H	H	H	A	H	A	A	H	H	H	B	H	H	H	H	A	B	A	H	H	B	H	B	H	A	H	A	H	H	H	H	A	B	H	H	H	A
2_17196	1	80.943	H	B	H	B	B	H	A	B	A	B	H	H	H	A	H	A	A	H	H	H	B	H	H	H	H	A	B	A	H	H	B	H	B	H	A	H	A	H	H	H	H	A	B	H	H	H	A
2_17197	1	80.943	H	B	H	B	B	H	A	B	A	B	H	H	H	A	H	A	A	H	H	H	B	H	H	H	H	A	B	A	H	H	B	H	B	H	A	H	A	H	H	H	H	A	B	H	H	H	A
2_18524	1	80.943	H	B	H	B	B	H	A	B	A	B	H	H	H	A	H	A	A	H	H	H	B	H	H	H	H	A	B	A	H	H	B	H	B	H	A	H	A	H	H	H	H	A	B	H	H	H	A
2_19069	1	80.943	H	B	H	B	B	H	A	B	A	B	H	H	H	A	H	A	A	H	H	H	B	H	H	H	H	A	B	A	H	H	B	H	B	H	A	H	A	H	H	H	H	A	B	H	H	H	A
2_19401	1	80.943	H	B	H	B	B	H	A	B	A	B	H	H	H	A	H	A	A	H	H	H	B	H	H	H	H	A	B	A	H	H	B	H	B	H	A	H	A	H	H	H	H	A	B	H	H	H	A
2_19749	1	80.943	H	B	H	B	B	H	A	B	A	B	H	H	H	A	H	A	A	H	H	H	B	H	H	H	H	A	B	A	H	H	B	H	B	H	A	H	A	H	H	H	H	A	B	H	H	H	A
2_19750	1	80.943	H	B	H	B	B	H	A	B	A	B	H	H	H	A	H	A	A	H	H	H	B	H	H	H	H	A	B	A	H	H	B	H	B	H	A	H	A	H	H	H	H	A	B	H	H	H	A
2_20473	1	80.943	H	B	H	B	B	H	A	B	A	B	H	H	H	A	H	A	A	H	H	H	B	H	H	H	H	A	B	A	H	H	B	H	B	H	A	H	A	H	H	H	H	A	B	H	H	H	A
2_20575	1	80.943	H	B	H	B	B	H	A	B	A	B	H	H	H	A	H	A	A	H	H	H	B	H	H	H	H	A	B	A	H	H	B	H	B	H	A	H	A	H	H	H	H	A	B	H	H	H	A
2_20576	1	80.943	H	B	H	B	B	H	A	B	A	B	H	H	H	A	H	A	A	H	H	H	B	H	H	H	H	A	B	A	H	H	B	H	B	H	A	H	A	H	H	H	H	A	B	H	H	H	A
2_22121	1	80.943	H	B	H	B	B	H	A	B	A	B	H	H	H	A	H	A	A	H	H	H	B	H	H	H	H	A	B	A	H	H	B	H	B	H	A	H	A	H	H	H	H	A	B	H	H	H	A
2_22505	1	80.943	H	B	H	B	B	H	A	B	A	B	H	H	H	A	H	A	A	H	H	H	B	H	H	H	H	A	B	A	H	H	B	H	B	H	A	H	A	H	H	H	H	A	B	H	H	H	A
2_23027	1	80.943	H	B	H	B	B	H	A	B	A	B	H	H	H	A	H	A	A	H	H	H	B	H	H	H	H	A	B	A	H	H	B	H	B	H	A	H	A	H	H	H	H	A	B	H	H	H	A
2_23028	1	80.943	H	B	H	B	B	H	A	B	A	B	H	H	H	A	H	A	A	H	H	H	B	H	H	H	H	A	B	A	H	H	B	H	B	H	A	H	A	H	H	H	H	A	B	H	H	H	A
2_23314	1	80.943	H	B	H	B	B	H	A	B	A	B	H	H	H	A	H	A	A	H	H	H	B	H	H	H	H	A	B	A	H	H	B	H	B	H	A	H	A	H	H	H	H	A	B	H	H	H	A
2_23315	1	80.943	H	B	H	B	B	H	A	B	A	B	H	H	H	A	H	A	A	H	H	H	B	H	H	H	H	A	B	A	H	H	B	H	B	H	A	H	A	H	H	H	H	A	B	H	H	H	A
2_23519	1	80.943	H	B	H	B	B	H	A	B	A	B	H	H	H	A	H	A	A	H	H	H	B	H	H	H	H	A	B	A	H	H	B	H	B	H	A	H	A	H	H	H	H	A	B	H	H	H	A
2_24289	1	80.943	H	B	H	B	B	H	A	B	A	B	H	H	H	A	H	A	A	H	H	H	B	H	H	H	H	A	B	A	H	H	B	H	B	H	A	H	A	H	H	H	H	A	B	H	H	H	A
2_26084	1	80.943	H	B	H	B	B	H	A	B	A	B	H	H	H	A	H	A	A	H	H	H	B	H	H	H	H	A	B	A	H	H	B	H	B	H	A	H	A	H	H	H	H	A	B	H	H	H	A
2_29218	1	80.943	H	B	H	B	B	H	A	B	A	B	H	H	H	A	H	A	A	H	H	H	B	H	H	H	H	A	B	A	H	H	B	H	B	H	A	H	A	H	H	H	H	A	B	H	H	H	A
2_29219	1	80.943	H	B	H	B	B	H	A	B	A	B	H	H	H	A	H	A	A	H	H	H	B	H	H	H	H	A	B	A	H	H	B	H	B	H	A	H	A	H	H	H	H	A	B	H	H	H	A
2_29767	1	80.943	H	B	H	B	B	H	A	B	A	B	H	H	H	A	H	A	A	H	H	H	B	H	H	H	H	A	B	A	H	H	B	H	B	H	A	H	A	H	H	H	H	A	B	H	H	H	A
2_29768	1	80.943	H	B	H	B	B	H	A	B	A	B	H	H	H	A	H	A	A	H	H	H	B	H	H	H	H	A	B	A	H	H	B	H	B	H	A	H	A	H	H	H	H	A	B	H	H	H	A
2_30122	1	80.943	H	B	H	B	B	H	A	B	A	B	H	H	H	A	H	A	A	H	H	H	B	H	H	H	H	A	B	A	H	H	B	H	B	H	A	H	A	H	H	H	H	A	B	H	H	H	A
2_30373	1	80.943	H	B	H	B	B	H	A	B	A	B	H	H	H	A	H	A	A	H	H	H	B	H	H	H	H	A	B	A	H	H	B	H	B	H	A	H	A	H	H	H	H	A	B	H	H	H	A
2_30374	1	80.943	H	B	H	B	B	H	A	B	A	B	H	H	H	A	H	A	A	H	H	H	B	H	H	H	H	A	B	A	H	H	B	H	B	H	A	H	A	H	H	H	H	A	B	H	H	H	A
2_30811	1	80.943	H	B	H	B	B	H	A	B	A	B	H	H	H	A	H	A	A	H	H	H	B	H	H	H	H	A	B	A	H	H	B	H	B	H	A	H	A	H	H	H	H	A	B	H	H	H	A
2_30858	1	80.943	H	B	H	B	B	H	A	B	A	B	H	H	H	A	H	A	A	H	H	H	B	H	H	H	H	A	B	A	H	H	B	H	B	H	A	H	A	H	H	H	H	A	B	H	H	H	A
2_31048	1	80.943	H	B	H	B	B	H	A	B	A	B	H	H	H	A	H	A	A	H	H	H	B	H	H	H	H	A	B	A	H	H	B	H	B	H	A	H	A	H	H	H	H	A	B	H	H	H	A
2_31694	1	80.943	H	B	H	B	B	H	A	B	A	B	H	H	H	A	H	A	A	H	H	H	B	H	H	H	H	A	B	A	H	H	B	H	B	H	A	H	A	H	H	H	H	A	B	H	H	H	A
2_32360	1	80.943	H	B	H	B	B	H	A	B	A	B	H	H	H	A	H	A	A	H	H	H	B	H	H	H	H	A	B	A	H	H	B	H	B	H	A	H	A	H	H	H	H	A	B	H	H	H	A
2_33316	1	80.943	H	B	H	B	B	H	A	B	A	B	H	H	H	A	H	A	A	H	H	H	B	H	H	H	H	A	B	A	H	H	B	H	B	H	A	H	A	H	H	H	H	A	B	H	H	H	A
2_33929	1	80.943	H	B	H	B	B	H	A	B	A	B	H	H	H	A	H	A	A	H	H	H	B	H	H	H	H	A	B	A	H	H	B	H	B	H	A	H	A	H	H	H	H	A	B	H	H	H	A
2_34395	1	80.943	H	B	H	B	B	H	A	B	A	B	H	H	H	A	H	A	A	H	H	H	B	H	H	H	H	A	B	A	H	H	B	H	B	H	A	H	A	H	H	H	H	A	B	H	H	H	A
2_34541	1	80.943	H	B	H	B	B	H	A	B	A	B	H	H	H	A	H	A	A	H	H	H	B	H	H	H	H	A	B	A	H	H	B	H	B	H	A	H	A	H	H	H	H	A	B	H	H	H	A
2_38170	1	80.943	H	-	H	-	-	H	A	B	A	B	H	H	H	A	H	A	A	H	H	H	B	H	H	H	H	A	B	A	H	H	B	H	B	H	A	H	A	H	H	H	H	A	B	H	H	H	A
2_46727	1	80.943	H	B	H	B	B	H	A	B	A	B	H	H	H	A	H	A	A	H	H	H	B	H	H	H	H	A	B	A	H	H	B	H	B	H	A	H	A	H	H	H	H	A	B	H	H	H	A
2_48745	1	80.943	H	B	H	B	B	H	A	B	A	B	H	H	H	A	H	A	A	H	H	H	B	H	H	H	H	A	B	A	H	H	B	H	B	H	A	H	A	H	H	H	H	A	B	H	H	H	A
2_49845	1	80.943	H	B	H	B	B	H	A	B	A	B	H	H	H	A	H	A	A	H	H	H	B	H	H	H	H	A	B	A	H	H	B	H	B	H	A	H	A	H	H	H	H	A	B	H	H	H	A
2_50901	1	80.943	H	B	H	B	B	H	A	B	A	B	H	H	H	A	H	A	A	H	H	H	B	H	H	H	H	A	B	A	H	H	B	H	B	H	A	H	A	H	H	H	H	A	B	H	H	H	A
2_53398	1	80.943	H	B	H	B	B	H	A	B	A	B	H	H	H	A	H	A	A	H	H	H	B	H	H	H	H	A	B	A	H	H	B	H	B	H	A	H	A	H	H	H	H	A	B	H	H	H	A
2_54752	1	80.943	H	B	H	B	B	H	A	B	A	B	H	H	H	A	H	A	A	H	H	H	B	H	H	H	H	A	B	A	H	H	B	H	B	H	A	H	A	H	H	H	H	A	B	H	H	H	A
2_54893	1	80.943	H	B	H	B	B	H	A	B	A	B	H	H	H	A	H	A	A	H	H	H	B	H	H	H	H	A	B	A	H	H	B	H	B	H	A	H	A	H	H	H	H	A	B	H	H	H	A
1_0261	2	0	H	H	B	H	B	B	H	H	H	H	A	A	H	H	A	B	H	H	H	H	A	A	H	H	B	A	H	B	B	H	B	A	A	H	H	-	B	B	H	H	A	B	B	A	H	B	H
1_0763	2	0	H	H	B	H	B	B	H	H	H	H	A	A	H	H	A	B	H	H	H	H	A	A	H	H	B	A	H	B	B	H	B	A	A	H	H	A	B	B	H	H	A	B	B	A	H	B	H
1_1521	2	0	H	H	B	H	B	B	H	H	H	H	A	A	H	H	A	B	H	H	H	H	A	A	H	H	B	A	H	B	B	H	B	A	A	H	H	A	B	B	H	H	A	B	B	A	H	B	H
2_00017	2	0	H	H	B	H	B	B	H	H	-	H	A	A	H	H	A	B	H	H	H	H	A	A	H	H	B	A	H	B	B	H	B	A	A	H	H	A	B	B	H	H	A	B	B	A	H	B	H
2_00057	2	0	H	H	B	H	B	B	H	H	H	H	A	A	H	H	A	B	H	H	H	H	A	A	H	H	B	A	H	B	B	H	B	A	A	H	H	A	B	B	H	H	A	B	B	A	H	B	H
2_00325	2	0	H	H	B	H	B	B	H	H	H	H	A	A	H	H	A	B	H	H	H	H	A	A	H	H	B	A	H	B	B	H	B	A	A	H	H	A	B	B	H	H	A	B	B	A	H	B	H
2_00888	2	0	H	H	B	H	B	B	H	H	H	H	A	A	H	H	A	B	H	-	H	H	A	A	H	H	B	A	H	B	B	H	B	A	A	H	H	A	B	B	H	H	A	B	B	A	H	B	H
2_00889	2	0	H	H	B	H	B	B	H	H	H	H	A	A	H	H	A	B	H	H	H	H	A	A	H	H	B	A	H	B	B	H	B	A	A	H	H	A	B	B	H	H	A	B	B	A	H	B	H
2_00910	2	0	H	H	B	H	B	B	H	H	H	H	A	A	H	H	A	B	H	H	H	H	A	A	H	H	B	A	H	B	B	H	B	A	A	H	H	A	B	B	H	H	A	B	B	A	H	B	H
2_00911	2	0	H	H	B	H	B	B	H	H	H	H	A	A	H	H	A	B	H	H	H	H	A	A	H	H	B	A	H	B	B	H	B	A	A	H	H	A	B	B	H	H	A	B	B	A	H	B	H
2_00912	2	0	H	H	B	H	B	B	H	H	H	H	A	A	H	H	A	B	H	H	H	H	A	A	H	H	B	A	H	B	B	H	B	A	A	H	H	A	B	B	H	H	A	B	B	A	H	B	H
2_00913	2	0	H	H	B	H	B	B	H	H	H	H	A	A	H	H	A	B	H	H	H	H	A	A	H	H	B	A	H	B	B	H	B	A	A	H	H	A	B	B	H	H	A	B	B	A	H	B	H
2_00915	2	0	H	H	B	H	B	B	H	H	H	H	A	A	H	H	A	B	H	H	H	H	A	A	H	H	B	A	H	B	B	H	B	A	A	H	H	A	B	B	H	H	A	B	B	A	H	B	H
2_01230	2	0	H	H	B	H	B	B	H	H	H	H	A	A	H	H	A	B	H	H	H	H	A	A	H	H	B	A	H	B	B	H	B	A	A	H	H	A	B	B	H	H	A	B	B	A	H	B	H
2_02431	2	0	H	H	B	H	B	B	H	H	H	H	A	A	H	H	A	B	H	H	H	H	A	A	H	H	B	A	H	B	B	H	B	A	A	H	H	A	B	B	H	H	A	B	B	A	H	B	H
2_02432	2	0	H	H	B	H	B	B	H	H	H	H	A	A	H	H	A	B	H	H	H	H	A	A	H	H	B	A	H	B	B	H	B	A	A	H	H	A	B	B	H	H	A	B	B	A	H	B	H
2_02539	2	0	H	H	B	H	B	B	H	H	H	H	A	A	H	H	A	B	H	H	H	H	A	A	H	H	B	A	H	B	B	H	B	A	A	H	H	A	B	B	H	H	A	B	B	A	H	B	H
2_02894	2	0	H	H	B	H	B	B	H	H	H	H	A	A	H	H	A	B	H	H	H	H	A	A	H	H	B	A	H	B	B	H	B	A	A	H	H	A	B	B	H	H	A	B	B	A	H	B	H
2_02895	2	0	H	H	B	H	B	B	H	H	H	H	A	A	H	H	A	B	H	H	H	H	A	A	H	H	B	A	H	B	B	H	B	A	A	H	H	A	B	B	H	H	A	B	B	A	H	B	H
2_02970	2	0	H	H	B	H	B	B	H	H	H	H	A	A	H	H	A	B	H	H	H	H	A	A	H	H	B	A	H	B	B	H	B	A	A	H	H	A	B	B	H	H	A	B	B	A	H	B	H
2_03345	2	0	H	H	B	H	B	B	H	H	H	H	A	A	H	H	A	B	H	H	H	H	A	A	H	H	B	A	H	B	B	H	B	A	A	H	H	A	B	B	H	H	A	B	B	A	H	B	H
2_03400	2	0	H	H	B	H	B	B	H	H	H	H	A	A	H	H	A	B	H	H	H	H	A	A	H	H	B	A	H	B	B	H	B	A	A	H	H	A	B	B	H	H	A	B	B	A	H	B	H
2_03428	2	0	H	H	B	H	B	B	H	H	H	H	A	A	H	H	A	B	H	H	H	H	A	A	H	H	B	A	H	B	B	H	B	A	A	H	H	A	B	B	H	H	A	B	B	A	H	B	H
2_03734	2	0	H	H	B	H	B	B	H	H	H	H	A	A	H	H	A	B	H	H	H	H	A	A	H	H	B	A	H	B	B	H	B	A	A	H	H	A	B	B	H	H	A	B	B	A	H	B	H
2_03735	2	0	H	H	B	H	B	B	H	H	H	H	A	A	H	H	A	B	H	H	H	H	A	A	H	H	B	A	H	B	B	H	B	A	A	H	H	A	B	B	H	H	A	B	B	A	H	B	H
2_04189	2	0	H	H	B	H	B	B	H	H	H	H	A	A	H	H	A	B	H	H	H	H	A	A	H	H	B	A	H	B	B	H	B	A	A	H	H	A	B	B	H	H	A	B	B	A	H	B	H
2_04190	2	0	H	H	B	H	B	B	H	H	H	H	A	A	H	H	A	B	H	H	H	H	A	A	H	H	B	A	H	B	B	H	B	A	A	H	H	A	B	B	H	H	A	B	B	A	H	B	H
2_04489	2	0	H	H	B	H	B	B	H	H	H	H	A	A	H	H	A	B	H	H	H	H	A	A	H	H	B	A	H	B	B	H	B	A	A	H	H	A	B	B	H	H	A	B	B	A	H	B	H
2_04493	2	0	H	H	B	H	B	B	H	H	H	H	A	A	H	H	A	B	H	H	H	H	A	A	H	H	B	A	H	B	B	H	B	A	A	H	H	A	B	B	H	H	A	B	B	A	H	B	H
2_04561	2	0	H	H	B	H	B	B	H	H	H	H	A	A	H	H	A	B	H	H	H	H	A	A	H	H	B	A	H	B	B	H	B	A	A	H	H	A	B	B	H	H	A	B	B	A	H	B	H
2_04562	2	0	-	-	B	-	B	B	H	-	-	-	A	A	H	H	A	B	H	H	H	H	A	A	H	H	B	A	H	B	B	H	B	A	A	H	H	A	B	B	H	H	A	B	B	A	H	B	H
2_04563	2	0	H	H	B	H	B	B	H	H	H	H	A	A	H	H	A	B	H	H	H	H	A	A	H	H	B	A	H	B	B	H	B	A	A	H	H	A	B	B	H	H	A	B	B	A	H	B	H
2_04942	2	0	H	H	B	H	B	B	H	H	H	H	A	A	H	H	A	B	H	H	H	H	A	A	H	H	B	A	H	B	B	H	B	A	A	H	H	A	B	B	H	H	A	B	B	A	H	B	H
2_04943	2	0	H	H	B	H	B	B	H	H	H	H	A	A	H	H	A	B	H	H	H	H	A	A	H	H	B	A	H	B	B	H	B	A	A	H	H	A	B	B	H	H	A	B	B	A	H	B	H
2_05675	2	0	H	H	B	H	B	B	H	H	H	H	A	A	H	H	A	B	H	H	H	H	A	A	H	H	B	A	H	B	B	H	B	A	A	H	H	A	B	B	H	H	A	B	B	A	H	B	H
2_05676	2	0	H	H	B	H	B	B	H	H	H	H	A	A	H	H	A	B	H	H	H	H	A	A	H	H	B	A	H	B	B	H	B	A	A	H	H	A	B	B	H	H	A	B	B	A	H	B	H
2_06320	2	0	H	H	B	H	B	B	H	H	H	H	A	A	H	H	A	B	H	H	H	H	A	A	H	H	B	A	H	B	B	H	B	A	A	H	H	A	B	B	H	H	A	B	B	A	H	B	H
2_06321	2	0	H	H	B	H	B	B	H	H	H	H	A	A	H	H	A	B	H	H	H	H	A	A	H	H	B	A	H	B	B	H	B	A	A	H	H	A	B	B	H	H	A	B	B	A	H	B	H
2_06545	2	0	H	H	B	H	B	B	H	H	H	H	A	A	H	H	A	B	H	H	H	H	A	A	H	H	B	A	H	B	B	H	B	A	A	H	H	A	B	B	H	H	A	B	B	A	H	B	H
2_07006	2	0	H	H	B	H	B	B	H	H	H	H	A	A	H	H	A	B	H	H	H	H	A	A	H	H	B	A	H	B	B	H	B	A	A	H	H	A	B	B	H	H	A	B	B	A	H	B	H
2_07007	2	0	H	H	B	H	B	B	H	H	H	H	A	A	H	H	A	B	H	H	H	H	A	A	H	H	B	A	H	B	B	H	B	A	A	H	H	A	B	B	H	H	A	B	B	A	H	B	H
2_07415	2	0	H	H	B	H	B	B	H	H	H	H	A	A	H	H	A	B	H	H	H	H	A	A	H	H	B	A	H	B	B	H	B	A	A	H	H	A	B	B	H	H	A	B	B	A	H	B	H
2_07416	2	0	H	H	B	H	B	B	H	H	H	H	A	A	H	H	A	B	H	H	H	H	A	A	H	H	B	A	H	B	B	H	B	A	A	H	H	A	B	B	H	H	A	B	B	A	H	B	H
2_07740	2	0	H	H	B	H	B	B	H	H	H	H	A	A	H	H	A	B	H	H	H	H	A	A	H	H	B	A	H	B	B	H	B	A	A	H	H	A	B	B	H	H	A	B	B	A	H	B	H
2_07993	2	0	H	H	B	H	B	B	H	H	H	H	A	A	H	H	A	B	H	H	H	H	A	A	H	H	B	A	H	B	B	H	B	A	A	H	H	A	B	B	H	H	A	B	B	A	H	B	H
2_07994	2	0	H	H	B	H	B	B	H	H	H	H	A	A	H	H	A	B	H	H	H	H	A	A	H	H	B	A	H	B	B	H	B	A	A	H	H	A	B	B	H	H	A	B	B	A	H	B	H
2_08866	2	0	H	H	B	H	B	B	H	H	H	H	A	A	H	H	A	B	H	H	H	H	A	A	H	H	B	A	H	B	B	H	B	A	A	H	H	A	B	B	H	H	A	B	B	A	H	B	H
2_08867	2	0	H	H	B	H	B	B	H	H	H	H	A	A	H	H	A	B	H	H	H	H	A	A	H	H	B	A	H	B	B	H	B	A	A	H	H	A	B	B	H	H	A	B	B	A	H	B	H
2_08913	2	0	H	H	-	H	-	B	H	H	H	H	A	A	H	H	A	B	H	H	H	H	A	A	H	H	B	A	H	B	B	H	B	A	A	H	H	A	B	B	H	H	A	B	B	A	H	B	H
2_08914	2	0	H	H	B	H	B	B	H	H	H	H	A	A	H	H	A	B	H	H	H	H	A	A	H	H	B	A	H	B	B	H	B	A	A	H	H	A	B	B	H	H	A	B	B	A	H	B	H
2_10529	2	0	H	H	B	H	B	B	H	H	H	H	A	A	H	H	A	B	H	H	H	H	A	A	H	H	B	A	H	B	B	H	B	A	A	H	H	A	B	B	H	H	A	B	B	A	H	B	H
2_11390	2	0	H	H	B	H	B	B	H	H	H	H	A	A	H	H	A	B	H	H	H	H	A	A	H	H	B	A	H	B	B	H	B	A	A	H	H	A	B	B	H	H	A	B	B	A	H	B	H
2_11391	2	0	H	H	B	H	B	B	H	H	H	H	A	A	H	H	A	B	H	H	H	H	A	A	H	H	B	A	H	B	B	H	B	A	A	H	H	A	B	B	H	H	A	B	B	A	H	B	H
2_11923	2	0	H	H	B	H	B	B	H	H	H	H	A	A	H	H	A	B	H	H	H	H	A	A	H	H	B	A	H	B	B	H	B	A	A	H	H	A	B	B	H	H	A	B	B	A	H	B	H
2_12943	2	0	H	H	B	H	B	B	H	H	H	H	A	A	H	H	A	B	H	H	H	H	A	A	H	H	B	A	H	B	B	H	B	A	A	H	H	A	B	B	H	H	A	-	-	A	H	B	H
2_13449	2	0	H	H	B	H	B	B	H	H	H	H	A	A	H	H	A	B	H	H	H	H	A	A	H	H	B	A	H	B	B	H	B	A	A	H	H	A	B	B	H	H	A	B	B	A	H	B	H
2_13569	2	0	H	H	B	H	B	B	H	H	H	H	A	A	H	H	A	B	H	H	H	H	A	A	H	H	B	A	H	B	B	H	B	A	A	H	H	A	B	B	H	H	A	B	B	A	H	B	H
2_13570	2	0	H	H	B	H	B	B	H	H	H	H	A	A	H	H	A	B	H	H	H	H	A	A	H	H	B	A	H	B	B	H	B	A	A	H	H	A	B	B	H	H	A	B	B	A	H	B	H
2_13877	2	0	H	H	B	H	B	B	H	H	H	H	A	A	H	H	A	B	H	H	H	H	A	A	H	H	B	A	H	B	B	H	B	A	A	H	H	A	B	B	H	H	A	B	B	A	H	B	H
2_13878	2	0	H	H	B	H	B	B	H	H	H	H	A	A	H	H	A	B	H	H	H	H	A	A	H	H	B	A	H	B	B	H	B	A	A	H	H	A	B	B	H	H	A	B	B	A	H	B	H
2_14033	2	0	-	-	B	H	B	B	H	H	H	H	A	A	H	H	A	B	H	H	H	H	A	A	H	H	B	A	H	B	B	H	B	A	A	H	H	A	B	B	H	H	A	B	B	A	H	B	H
2_14510	2	0	H	H	B	H	B	B	H	H	H	H	A	A	H	H	A	B	H	H	H	H	A	A	H	H	B	A	H	B	B	H	B	A	A	H	H	A	B	B	H	H	A	B	B	A	H	B	H
2_14511	2	0	H	H	B	H	B	B	H	H	H	H	A	A	H	H	A	B	H	H	H	H	A	A	H	H	B	A	H	B	-	H	B	A	A	H	H	A	B	-	H	H	A	-	-	A	H	B	H
2_16289	2	0	H	H	B	H	B	B	H	H	H	H	A	A	H	H	A	B	H	H	H	H	A	A	H	H	B	A	H	B	B	H	B	A	A	H	H	A	B	B	H	H	A	B	B	A	H	B	H
2_16290	2	0	H	H	B	H	B	B	H	H	H	H	A	A	H	H	A	B	H	H	H	H	A	A	H	H	B	A	H	B	B	H	B	A	A	H	H	A	B	B	H	H	A	B	B	A	H	B	H
2_18497	2	0	H	H	B	H	B	B	H	H	H	H	A	A	H	H	A	B	H	H	H	H	A	A	H	H	B	A	H	B	B	H	B	A	A	H	H	A	B	B	H	H	A	B	B	A	H	B	H
2_18764	2	0	-	H	B	-	B	B	H	H	H	H	A	A	H	H	A	B	H	-	H	H	A	A	H	H	B	A	H	B	B	H	B	A	A	H	H	A	B	B	H	H	A	B	B	A	H	B	H
2_18779	2	0	H	H	B	H	B	B	H	H	H	H	A	A	H	H	A	B	H	H	H	H	A	A	H	H	B	A	H	B	B	H	B	A	A	H	H	A	B	B	H	H	A	B	B	A	H	B	H
2_18989	2	0	H	H	B	H	B	B	H	H	H	H	A	A	H	H	A	B	H	H	H	H	A	A	H	H	B	A	H	B	B	H	B	A	A	H	H	A	B	B	H	H	A	B	B	A	H	B	H
2_19614	2	0	H	H	B	H	B	B	H	H	H	H	A	A	H	H	A	B	H	H	H	H	A	A	H	H	B	A	H	B	B	H	B	A	A	H	H	A	B	B	H	H	A	B	B	A	H	B	H
2_20040	2	0	H	H	B	H	B	B	H	H	H	H	A	A	H	H	A	B	H	H	H	H	A	A	H	H	B	A	H	B	B	H	B	A	A	H	H	A	B	B	H	H	A	B	B	A	H	B	H
2_20107	2	0	H	H	B	H	B	B	H	H	H	H	A	A	H	H	A	B	H	H	H	H	A	A	H	H	B	A	H	B	B	H	B	A	A	H	H	A	B	B	H	H	A	B	B	A	H	B	H
2_21019	2	0	H	H	-	H	-	B	H	H	H	H	A	A	H	H	A	B	H	H	H	H	A	A	H	H	B	A	H	B	B	H	B	A	A	H	H	A	B	B	H	H	A	B	B	A	H	B	H
2_21048	2	0	H	H	B	H	B	B	H	H	H	H	A	A	H	H	A	B	H	H	H	H	A	A	H	H	B	A	H	B	B	H	B	A	A	H	H	A	B	B	H	H	A	B	B	A	H	B	H
2_21049	2	0	H	H	B	H	B	B	H	H	H	H	A	A	H	H	A	B	H	H	H	H	A	A	H	H	B	A	H	B	B	H	B	A	A	H	H	A	B	B	H	H	A	B	B	A	H	B	H
2_21085	2	0	H	H	B	H	B	B	H	H	H	H	A	A	H	H	A	B	H	H	H	H	A	A	H	H	B	A	H	B	B	H	B	A	A	H	H	A	B	B	H	H	A	B	B	A	H	B	H
2_21133	2	0	H	H	B	H	B	B	H	H	H	H	A	A	H	H	A	B	H	H	H	H	A	A	H	H	B	A	H	B	B	H	B	A	A	H	H	A	B	B	H	H	A	B	B	A	H	B	H
2_21191	2	0	H	H	B	H	B	B	H	H	H	H	A	A	H	H	A	B	H	H	H	H	A	A	H	H	B	A	H	B	B	H	B	A	A	H	H	A	B	B	H	H	A	B	B	A	H	B	H
2_21192	2	0	H	H	B	H	B	B	H	H	H	H	A	A	H	H	A	B	H	H	H	H	A	A	H	H	B	A	H	B	B	H	B	A	A	H	H	A	B	B	H	H	A	B	B	A	H	B	H
2_21310	2	0	H	H	B	H	B	B	H	H	H	H	A	A	H	H	A	B	H	H	H	H	A	A	H	H	B	A	H	B	B	H	B	A	A	H	H	A	B	B	H	H	A	B	B	A	H	B	H
2_22137	2	0	H	H	B	H	B	B	H	H	H	H	A	A	H	H	A	B	H	H	H	H	A	A	H	H	B	A	H	B	B	H	B	A	A	H	H	A	B	B	H	H	A	B	B	A	H	B	H
2_22138	2	0	H	H	B	H	B	B	H	H	H	H	A	A	H	H	A	B	H	H	H	H	A	A	H	H	B	A	H	B	B	H	B	A	A	H	H	A	B	B	H	H	A	B	B	A	H	B	H
2_24058	2	0	H	H	B	H	B	B	H	H	H	H	A	A	H	H	A	B	H	H	H	H	A	A	H	H	B	A	H	B	B	H	B	A	A	H	H	A	B	B	H	H	A	B	B	A	H	B	H
2_24833	2	0	H	H	B	H	B	B	H	H	H	H	A	A	H	H	A	B	H	H	H	H	A	A	H	H	B	A	H	B	B	H	B	A	A	H	H	A	B	B	H	H	A	B	B	A	H	B	H
2_24834	2	0	H	H	B	H	B	B	H	H	H	H	A	A	H	H	A	B	H	H	H	H	A	A	H	H	B	A	H	B	B	H	B	A	A	H	H	A	B	B	H	H	A	B	B	A	H	B	H
2_25519	2	0	H	H	B	H	B	B	H	H	H	H	A	A	H	H	A	B	H	H	H	H	A	A	H	H	B	A	H	B	B	H	B	A	A	H	H	A	B	B	H	H	A	B	B	A	H	B	H
2_25520	2	0	H	H	B	H	B	B	H	H	H	H	A	A	H	H	A	B	H	H	H	H	A	A	H	H	B	A	H	B	B	H	B	A	A	H	H	A	B	B	H	H	A	B	B	A	H	B	H
2_25568	2	0	H	H	B	H	B	B	H	H	H	H	A	A	H	H	A	B	H	H	H	H	A	A	H	H	B	A	H	B	B	H	B	A	A	H	H	A	B	B	H	H	A	B	B	A	H	B	H
2_25569	2	0	H	H	B	H	B	B	H	H	H	H	A	A	H	H	A	B	H	H	H	H	A	A	H	H	B	A	H	B	B	H	B	A	A	H	H	A	B	B	H	H	A	B	B	A	H	B	H
2_25570	2	0	H	H	B	H	B	B	H	H	H	H	A	A	H	H	A	B	H	H	H	H	A	A	H	H	B	A	H	B	B	H	B	A	A	H	H	A	B	B	H	H	A	B	B	A	H	B	H
2_25716	2	0	H	H	B	H	B	B	H	H	H	H	A	A	H	H	A	B	H	H	H	H	A	A	H	H	B	A	H	B	B	H	B	A	A	H	H	A	B	B	H	H	A	B	B	A	H	B	H
2_25795	2	0	H	H	B	H	B	B	H	H	H	H	A	A	H	H	A	B	H	H	H	H	A	A	H	H	B	A	H	B	B	H	B	A	A	H	H	A	B	B	H	H	A	B	B	A	H	B	H
2_25796	2	0	H	H	B	H	B	B	H	H	H	H	A	A	H	H	A	B	H	H	H	H	A	A	H	H	B	A	H	B	B	H	B	A	A	H	H	A	B	B	H	H	A	B	B	A	H	B	H
2_25886	2	0	H	H	B	H	B	B	H	H	H	H	A	A	H	H	A	B	H	H	H	H	A	A	H	H	B	A	H	B	B	H	B	A	A	H	H	A	B	B	H	H	A	B	B	A	H	B	H
2_25931	2	0	H	H	B	H	B	B	H	H	H	H	A	A	H	H	A	B	H	H	H	H	A	A	H	H	B	A	H	B	B	H	B	A	A	H	H	A	B	B	H	H	A	B	B	A	H	B	H
2_25932	2	0	H	H	B	H	B	B	H	H	H	H	A	A	H	H	A	B	H	H	H	H	A	A	H	H	B	A	H	B	B	H	B	A	A	H	H	A	B	B	H	H	A	B	B	A	H	B	H
2_26234	2	0	H	H	B	H	B	B	H	H	H	H	A	A	H	H	A	B	H	H	H	H	A	A	H	H	B	A	H	B	B	H	B	A	A	H	H	A	B	B	H	H	A	B	B	A	H	B	H
2_26235	2	0	H	H	B	H	B	B	H	H	H	H	A	A	H	H	A	B	H	H	H	H	A	A	H	H	B	A	H	B	B	H	B	A	A	H	H	A	B	B	H	H	A	B	B	A	H	B	H
2_27088	2	0	H	H	B	H	B	B	H	H	H	H	A	A	H	H	A	B	H	H	H	H	A	A	H	H	B	A	H	B	B	H	B	A	A	H	H	A	B	B	H	H	A	B	B	A	H	B	H
2_27546	2	0	H	H	B	H	B	B	H	H	H	H	A	A	H	H	A	B	H	H	H	H	A	A	H	H	B	A	H	B	B	H	B	A	A	H	H	A	B	B	H	H	A	B	B	A	H	B	H
2_28794	2	0	H	-	B	-	B	B	H	H	-	H	A	A	H	H	A	B	H	H	H	H	A	A	H	H	B	A	H	B	B	H	B	A	A	H	H	A	B	-	H	H	A	B	B	A	H	B	H
2_29164	2	0	H	H	B	H	B	B	H	H	H	H	A	A	H	H	A	B	H	H	H	H	A	A	H	H	B	A	H	B	B	H	B	A	A	H	H	A	B	B	H	H	A	B	B	A	H	B	H
2_29182	2	0	H	H	B	H	B	B	H	H	H	H	A	A	H	H	A	B	H	H	H	H	A	A	H	H	B	A	H	B	B	H	B	A	A	H	H	A	B	B	H	H	A	B	B	A	H	B	H
2_29226	2	0	H	H	B	H	B	B	H	H	H	H	A	A	H	H	A	B	H	H	H	H	A	A	H	H	B	A	H	B	B	H	B	A	A	H	H	A	B	B	H	H	A	B	B	A	H	B	H
2_29427	2	0	H	H	B	H	B	B	H	H	H	H	A	A	H	H	A	B	H	H	H	H	A	A	H	H	B	A	H	B	B	H	B	A	A	H	H	A	B	B	H	H	A	B	B	A	H	B	H
2_29615	2	0	H	H	B	H	B	B	H	H	H	H	A	A	H	H	A	B	H	H	H	H	A	A	H	H	B	A	H	B	B	H	B	A	A	H	H	A	B	B	H	H	A	B	B	A	H	B	H
2_30981	2	0	H	H	B	H	B	B	H	H	H	H	A	A	H	H	A	B	H	H	H	H	A	A	H	H	B	A	H	B	B	H	B	A	A	H	H	A	B	B	H	H	A	B	B	A	H	B	H
2_31039	2	0	H	H	B	H	B	B	H	H	H	H	A	A	H	H	A	B	H	H	H	H	A	A	H	H	B	A	H	B	B	H	B	A	A	H	H	A	B	B	H	H	A	B	B	A	H	B	H
2_31362	2	0	H	H	B	H	B	B	H	H	H	H	A	A	H	H	A	B	H	H	H	H	A	A	H	H	B	A	H	B	B	H	B	A	A	H	H	A	B	B	H	H	A	B	B	A	H	B	H
2_32880	2	0	H	H	B	H	B	B	H	H	H	H	A	A	H	H	A	B	H	H	H	H	A	A	H	H	B	A	H	B	B	H	B	A	A	H	H	A	B	B	H	H	A	B	B	A	H	B	H
2_33240	2	0	H	H	B	H	B	B	H	H	H	H	A	A	H	H	A	B	H	H	H	H	A	A	H	H	B	A	H	B	B	H	B	A	A	H	H	A	B	B	H	H	A	B	B	A	H	B	H
2_33289	2	0	H	H	B	H	B	B	H	H	H	H	A	A	H	H	A	B	H	H	H	H	A	A	H	H	B	A	H	B	B	H	B	A	A	H	H	A	B	B	H	H	A	B	B	A	H	B	H
2_33498	2	0	H	H	B	H	B	B	H	H	H	H	A	A	H	H	A	B	H	H	H	H	A	A	H	H	B	A	H	B	B	H	B	A	A	H	H	A	B	B	H	H	A	B	B	A	H	B	H
2_33794	2	0	H	H	B	H	B	B	H	H	H	H	A	A	H	H	A	B	H	H	H	H	A	A	H	H	B	A	H	B	B	H	B	A	A	H	H	A	B	B	H	H	A	B	B	A	H	B	H
2_33817	2	0	H	H	B	H	B	B	H	H	H	H	A	A	H	H	A	B	H	H	H	H	A	A	H	H	B	A	H	B	B	H	B	A	A	H	H	A	B	B	H	H	A	B	B	A	H	B	H
2_33842	2	0	H	H	B	H	B	B	H	H	H	H	A	A	H	H	A	B	H	H	H	H	A	A	H	H	B	A	H	B	B	H	B	A	A	H	H	A	B	B	H	H	A	B	B	A	H	B	H
2_33868	2	0	H	H	B	H	B	B	H	H	H	H	A	A	H	H	A	B	H	H	H	H	A	A	H	H	B	A	H	B	B	H	B	A	A	H	H	A	B	B	H	H	A	B	B	A	H	B	H
2_33969	2	0	H	H	B	H	B	B	H	H	H	H	A	A	H	H	A	B	H	H	H	H	A	A	H	H	B	A	H	B	B	H	B	A	A	H	H	A	B	B	H	H	A	B	B	A	H	B	H
2_34211	2	0	H	H	B	H	B	B	H	H	H	H	A	A	H	H	A	B	H	H	H	H	A	A	H	H	B	A	H	B	B	H	B	A	A	H	H	A	B	B	H	H	A	B	B	A	H	B	H
2_34253	2	0	H	H	B	H	B	B	H	H	H	H	A	A	H	H	A	B	H	H	H	H	A	A	H	H	B	A	H	B	B	H	B	A	A	H	H	A	B	B	H	H	A	B	B	A	H	B	H
2_37778	2	0	H	H	B	H	B	B	H	H	H	H	A	A	H	H	A	B	H	H	H	H	A	A	H	H	B	A	H	B	B	H	B	A	A	H	H	A	B	B	H	H	A	B	B	A	H	B	H
2_37779	2	0	H	H	B	H	B	B	H	H	H	H	A	A	H	H	A	B	H	H	H	H	A	A	H	H	B	A	H	B	B	H	B	A	A	H	H	A	B	B	H	H	A	B	B	A	H	B	H
2_37888	2	0	H	H	B	H	B	B	H	H	H	H	A	A	H	H	A	B	H	H	H	H	A	A	H	H	B	A	H	B	B	H	B	A	A	H	H	A	B	B	H	H	A	B	B	A	H	B	H
2_37889	2	0	H	H	B	H	B	B	H	H	H	H	A	A	H	H	A	B	H	H	H	H	A	A	H	H	B	A	H	B	B	H	B	A	A	H	H	A	B	B	H	H	A	B	B	A	H	B	H
2_38102	2	0	H	H	B	H	B	B	H	H	H	H	A	A	H	H	A	B	H	H	H	H	A	A	H	H	B	A	H	B	B	H	B	A	A	H	H	A	B	B	H	H	A	B	B	A	H	B	H
2_38127	2	0	H	H	B	H	B	B	H	H	H	H	A	A	H	H	A	B	H	H	H	H	A	A	H	H	B	A	H	B	B	H	B	A	A	H	H	A	B	B	H	H	A	B	B	A	H	B	H
2_38128	2	0	H	H	B	H	B	B	H	H	H	H	A	A	H	H	A	B	H	H	H	H	A	A	H	H	B	A	H	B	B	H	B	A	A	H	H	A	B	B	H	H	A	B	B	A	H	B	H
2_38297	2	0	H	H	B	H	B	B	H	H	H	H	A	A	H	H	A	B	H	H	H	H	A	A	H	H	B	A	H	B	B	H	B	A	A	H	H	A	B	B	H	H	A	B	B	A	H	B	H
2_38346	2	0	H	H	B	H	B	B	H	H	H	H	A	A	H	H	A	B	H	H	H	H	A	A	H	H	B	A	H	B	B	H	B	A	A	H	H	A	B	B	H	H	A	B	B	A	H	B	H
2_38347	2	0	H	H	B	H	B	B	H	H	H	H	A	A	H	H	A	B	H	H	H	H	A	A	H	H	B	A	H	B	B	H	B	A	A	H	H	A	B	B	H	H	A	B	B	A	H	B	H
2_38571	2	0	H	H	B	H	B	B	H	H	H	H	A	A	H	H	A	B	H	H	H	H	A	A	H	H	B	A	H	B	B	H	B	A	A	H	H	A	B	B	H	H	A	B	B	A	H	B	H
2_38858	2	0	H	H	B	H	B	B	H	H	H	H	A	A	H	H	A	B	H	H	H	H	A	A	H	H	B	A	H	B	B	H	B	A	A	H	H	A	B	B	H	H	A	B	B	A	H	B	H
2_38859	2	0	H	H	B	H	B	B	H	H	H	H	A	A	H	H	A	B	H	H	H	H	A	A	H	H	B	A	H	B	B	H	B	A	A	H	H	A	B	B	H	H	A	B	B	A	H	B	H
2_39005	2	0	H	H	B	H	B	B	H	-	-	H	A	A	H	H	A	B	H	H	H	H	A	A	H	H	B	A	H	B	B	H	B	A	A	H	H	-	B	B	H	H	A	B	B	A	H	B	H
2_39211	2	0	H	H	B	H	B	B	H	H	H	H	A	A	H	H	A	B	H	H	H	H	A	A	H	H	B	A	H	B	B	H	B	A	A	H	H	A	B	B	H	H	A	B	B	A	H	B	H
2_39363	2	0	H	H	B	H	B	B	H	H	H	H	A	A	H	H	A	B	H	H	H	H	A	A	H	H	B	A	H	B	B	H	B	A	A	H	H	A	B	B	H	H	A	B	B	A	H	B	H
2_39572	2	0	H	H	B	H	B	B	H	H	H	H	A	A	H	H	A	B	H	H	H	H	A	A	H	H	B	A	H	B	B	H	B	A	A	H	H	A	B	B	H	H	A	B	B	A	H	B	H
2_39697	2	0	H	H	B	H	B	B	H	H	H	H	A	A	H	H	A	B	H	H	H	H	A	A	H	H	B	A	H	B	B	H	B	A	A	H	H	A	B	B	H	H	A	B	B	A	H	B	H
2_39703	2	0	H	H	B	H	B	B	H	H	H	H	A	A	H	H	A	B	H	H	H	H	A	A	H	H	B	A	H	B	B	H	B	A	A	H	H	A	B	B	H	H	A	B	B	A	H	B	H
2_39706	2	0	H	H	B	H	B	B	H	H	H	H	A	A	H	H	A	B	H	H	H	H	A	A	H	H	B	A	H	B	B	H	B	A	A	H	H	A	B	B	H	H	A	B	B	A	H	B	H
2_39790	2	0	H	H	B	H	B	B	H	H	H	H	A	A	H	H	A	B	H	H	H	H	A	A	H	H	B	A	H	B	B	H	B	A	A	H	H	A	B	B	H	H	A	B	B	A	H	B	H
2_39960	2	0	H	H	B	H	B	B	H	H	H	H	A	A	H	H	A	B	H	H	H	H	A	A	H	H	B	A	H	B	B	H	B	A	A	H	H	A	B	B	H	H	A	B	B	A	H	B	H
2_39964	2	0	H	H	-	H	-	B	H	H	H	H	A	A	H	H	A	B	H	H	H	H	A	A	H	H	B	A	H	B	B	H	B	A	A	H	H	A	B	B	H	H	A	B	B	A	H	B	H
2_40191	2	0	H	H	B	H	B	B	H	H	H	H	A	A	H	H	A	B	H	H	H	H	A	A	H	H	B	A	H	B	B	H	B	A	A	H	H	A	B	B	H	H	A	B	B	A	H	B	H
2_40220	2	0	H	H	B	H	B	B	H	H	H	H	A	A	H	H	A	B	H	H	H	H	A	A	H	H	B	A	H	B	B	H	B	A	A	H	H	A	B	B	H	H	A	B	B	A	H	B	H
2_40275	2	0	H	H	B	H	B	B	H	H	H	H	A	A	H	H	A	B	H	H	H	H	A	A	H	H	B	A	H	B	B	H	B	A	A	H	H	A	B	B	H	H	A	B	B	A	H	B	H
2_40517	2	0	H	H	B	H	B	B	H	H	H	H	A	A	H	H	A	B	H	H	H	H	A	A	H	H	B	A	H	B	B	H	B	A	A	H	H	A	B	B	H	H	A	B	B	A	H	B	H
2_40889	2	0	H	H	B	H	B	B	H	H	H	H	A	A	H	H	A	B	H	H	H	H	A	A	H	H	B	A	H	B	B	H	B	A	A	H	H	A	B	B	H	H	A	B	B	A	H	B	H
2_40975	2	0	H	-	B	-	B	B	H	-	-	-	A	A	H	H	A	B	H	H	H	H	A	A	H	H	B	A	H	B	B	H	B	A	A	H	H	A	B	B	H	H	A	B	B	A	H	B	H
2_41070	2	0	H	H	B	H	B	B	H	H	H	H	A	A	H	H	A	B	H	H	H	H	A	A	H	H	B	A	H	B	B	H	B	A	A	H	H	A	B	B	H	H	A	B	B	A	H	B	H
2_41092	2	0	H	H	B	H	B	B	H	H	H	H	A	A	H	H	A	B	H	H	H	H	A	A	H	H	B	A	H	B	B	H	B	A	A	H	H	A	B	B	H	H	A	B	B	A	H	B	H
2_41390	2	0	H	H	B	H	B	-	H	H	H	H	A	A	H	H	A	B	H	H	H	H	A	A	H	H	B	A	H	B	B	H	B	A	A	H	H	A	B	B	H	H	A	B	B	A	H	B	H
2_41447	2	0	H	H	B	H	B	B	H	H	H	H	A	A	H	H	A	B	H	H	H	H	A	A	H	H	B	A	H	B	B	H	B	A	A	H	H	A	B	B	H	H	A	B	B	A	H	B	H
2_41490	2	0	H	H	B	H	B	B	H	H	H	H	A	A	H	H	A	B	H	H	H	H	A	A	H	H	B	A	H	B	B	H	B	A	A	H	H	A	B	B	H	H	A	B	B	A	H	B	H
2_41509	2	0	H	H	B	H	B	B	H	H	H	H	A	A	H	H	A	B	H	H	H	H	A	A	H	H	B	A	H	B	B	H	B	A	A	H	H	A	B	B	H	H	A	B	B	A	H	B	H
2_41583	2	0	H	H	B	H	B	B	H	H	H	H	A	A	H	H	A	B	H	H	H	H	A	A	H	H	B	A	H	B	B	H	B	A	A	H	H	A	B	B	H	H	A	B	B	A	H	B	H
2_41718	2	0	H	H	B	H	B	B	H	H	H	H	A	A	H	H	A	B	H	H	H	H	A	A	H	H	B	A	H	B	B	H	B	A	A	H	H	A	B	B	H	H	A	B	B	A	H	B	H
2_41733	2	0	H	H	B	H	B	B	H	H	-	H	A	A	H	H	A	B	H	H	H	H	A	A	H	H	B	A	H	B	B	H	B	A	A	H	H	A	B	B	H	H	A	B	B	A	H	B	H
2_41908	2	0	H	H	B	H	B	B	H	H	H	H	A	A	H	H	A	B	H	H	H	H	A	A	H	H	B	A	H	B	B	H	B	A	A	H	H	A	B	B	H	H	A	B	B	A	H	B	H
2_41922	2	0	H	H	B	H	B	B	H	H	H	H	A	A	H	H	A	B	H	H	H	H	A	A	H	H	B	A	H	B	B	H	B	A	A	H	H	A	B	B	H	H	A	B	B	A	H	B	H
2_41985	2	0	H	H	B	H	B	B	H	H	H	H	A	A	H	H	A	B	H	H	H	H	A	A	H	H	B	A	H	B	B	H	B	A	A	H	H	A	B	B	H	H	A	B	B	A	H	B	H
2_42110	2	0	H	H	B	H	B	B	H	H	H	H	A	A	H	H	A	B	H	H	H	H	A	A	H	H	B	A	H	B	B	H	B	A	A	H	H	A	B	B	H	H	A	B	B	A	H	B	H
2_42239	2	0	H	H	B	H	B	B	H	H	H	H	A	A	H	H	A	B	H	-	H	H	A	A	H	H	B	A	H	B	B	H	B	A	A	H	H	A	B	B	H	H	A	B	B	A	H	B	H
2_42395	2	0	H	H	B	H	B	B	H	H	H	H	A	A	H	H	A	B	H	H	H	H	A	A	H	H	B	A	H	B	B	H	B	A	A	H	H	A	B	B	H	H	A	B	B	A	H	B	H
2_42401	2	0	H	H	B	H	B	B	H	H	H	H	A	A	H	H	A	B	H	H	H	H	A	A	H	H	B	A	H	B	B	H	B	A	A	H	H	A	B	B	H	H	A	B	B	A	H	B	H
2_42537	2	0	H	H	B	H	B	B	H	H	H	H	A	A	H	H	A	B	H	H	H	H	A	A	H	H	B	A	H	B	B	H	B	A	A	H	H	A	B	B	H	H	A	B	B	A	H	B	H
2_42623	2	0	H	H	B	H	B	B	H	H	H	H	A	A	H	H	A	B	H	H	H	H	A	A	H	H	B	A	H	B	B	H	B	A	A	H	H	A	B	B	H	H	A	B	B	A	H	B	H
2_42848	2	0	H	H	B	H	B	B	H	H	H	H	A	A	H	H	A	B	H	H	H	H	A	A	H	H	B	A	H	B	B	H	B	A	A	H	H	A	B	B	H	H	A	B	B	A	H	B	H
2_42950	2	0	H	H	B	H	B	B	H	H	H	H	A	A	H	H	A	B	H	H	H	H	A	A	H	H	B	A	H	B	B	H	B	A	A	H	H	A	B	B	H	H	A	B	B	A	H	B	H
2_42969	2	0	H	H	B	H	B	B	H	H	H	H	A	A	H	H	A	B	H	H	H	H	A	A	H	H	B	A	H	B	B	H	B	A	A	H	H	A	B	B	H	H	A	B	B	A	H	B	H
2_43055	2	0	H	H	B	H	B	B	H	H	H	H	A	A	H	H	A	B	H	H	H	H	A	A	H	H	B	A	H	B	B	H	B	A	A	H	H	A	B	B	H	H	A	B	B	A	H	B	H
2_43105	2	0	H	H	B	H	B	B	H	H	H	H	A	A	H	H	A	B	H	H	H	H	A	A	H	H	B	A	H	B	B	H	B	A	A	H	H	A	B	B	H	H	A	B	B	A	H	B	H
2_43319	2	0	H	H	B	H	B	B	H	H	H	H	A	A	H	H	A	B	H	H	H	H	A	A	H	H	B	A	H	B	B	H	B	A	A	H	H	A	B	B	H	H	A	B	B	A	H	B	H
2_43352	2	0	H	H	B	H	B	B	H	H	H	H	A	A	H	H	A	B	H	H	H	H	A	A	H	H	B	A	H	B	B	H	B	A	A	H	H	A	B	B	H	H	A	B	B	A	H	B	H
2_43401	2	0	H	H	B	H	B	B	H	H	H	H	A	A	H	H	A	B	H	H	H	H	A	A	H	H	B	A	H	B	B	H	B	A	A	H	H	A	B	B	H	H	A	B	B	A	H	B	H
2_43435	2	0	H	H	B	H	B	B	H	H	H	H	A	A	H	H	A	B	H	H	H	H	A	A	H	H	B	A	H	B	B	H	B	A	A	H	H	A	B	B	H	H	A	B	B	A	H	B	H
2_43541	2	0	H	H	B	H	B	B	H	H	H	H	A	A	H	H	A	B	H	H	H	H	A	A	H	H	B	A	H	B	B	H	B	A	A	H	H	A	B	B	H	H	A	B	B	A	H	B	H
2_43677	2	0	H	H	B	H	B	B	H	H	H	H	A	A	H	H	A	B	H	H	H	H	A	A	H	H	B	A	H	B	B	H	B	A	A	H	H	A	B	B	H	H	A	B	B	A	H	B	H
2_43712	2	0	H	H	B	H	B	B	H	H	H	H	A	A	H	H	A	B	H	H	H	H	A	A	H	H	B	A	H	B	B	H	B	A	A	H	H	A	B	B	H	H	A	B	B	A	H	B	H
2_43901	2	0	H	-	B	-	B	B	H	-	-	-	A	A	H	H	A	B	H	H	H	H	A	A	H	H	B	A	H	B	B	H	B	A	A	H	H	A	B	B	H	H	A	B	B	A	H	B	H
2_43971	2	0	H	H	B	H	B	B	H	H	H	H	A	A	H	H	A	B	H	H	H	H	A	A	H	H	B	A	H	B	B	H	B	A	A	H	H	A	B	B	H	H	A	B	B	A	H	B	H
2_44294	2	0	H	H	B	H	B	B	H	H	H	H	A	A	H	H	A	B	H	H	H	H	A	A	H	H	B	A	H	B	B	H	B	A	A	H	H	A	B	B	H	H	A	B	B	A	H	B	H
2_44340	2	0	H	H	B	H	B	B	H	H	H	H	A	A	H	H	A	B	H	H	H	H	A	A	H	H	B	A	H	B	B	H	B	A	A	H	H	A	B	B	H	H	A	B	B	A	H	B	H
2_44426	2	0	H	H	B	H	B	B	H	H	H	H	A	A	H	H	A	B	H	H	H	H	A	A	H	H	B	A	H	B	B	H	B	A	A	H	H	A	B	B	H	H	A	B	B	A	H	B	H
2_44576	2	0	H	H	B	H	B	B	H	H	H	H	A	A	H	H	A	B	H	H	H	H	A	A	H	H	B	A	H	B	B	H	B	A	A	H	H	A	B	B	H	H	A	B	B	A	H	B	H
2_44635	2	0	H	H	B	H	B	B	H	H	H	H	A	A	H	H	A	B	H	H	H	H	A	A	H	H	B	A	H	B	B	H	B	A	A	H	H	A	B	B	H	H	A	B	B	A	H	B	H
2_44805	2	0	H	H	B	H	B	B	H	H	H	H	A	A	H	H	A	B	H	H	H	H	A	A	H	H	B	A	H	B	B	H	B	A	A	H	H	A	B	B	H	H	A	B	B	A	H	B	H
2_44825	2	0	H	H	B	H	B	B	H	H	H	H	A	A	H	H	A	B	H	H	H	H	A	A	H	H	B	A	H	B	B	H	B	A	A	H	H	A	B	B	H	H	A	B	B	A	H	B	H
2_44928	2	0	H	H	B	H	B	B	H	H	H	H	A	A	H	H	A	B	H	H	H	H	A	A	H	H	B	A	H	B	B	H	B	A	A	H	H	A	B	B	H	H	A	B	B	A	H	B	H
2_45065	2	0	H	H	B	H	B	B	H	H	H	H	A	A	H	H	A	B	H	H	H	H	A	A	H	H	B	A	H	B	B	H	B	A	A	H	H	A	B	B	H	H	A	B	B	A	H	B	H
2_45146	2	0	H	H	B	H	B	B	H	H	H	H	A	A	H	H	A	B	H	H	H	H	A	A	H	H	B	A	H	B	B	H	B	A	A	H	H	A	B	B	H	H	A	B	B	A	H	B	H
2_45233	2	0	H	H	B	H	B	B	H	H	H	H	A	A	H	H	A	B	H	H	H	H	A	A	H	H	B	A	H	B	B	H	B	A	A	H	H	A	B	B	H	H	A	B	B	A	H	B	H
2_45380	2	0	H	H	B	H	B	-	H	H	H	H	A	A	H	H	A	B	H	H	H	H	A	A	H	H	B	A	H	B	-	H	B	A	A	H	H	A	B	-	H	H	A	B	B	A	H	B	H
2_45425	2	0	H	H	B	H	B	B	H	H	H	H	A	A	H	H	A	B	H	H	H	H	A	A	H	H	B	A	H	B	B	H	B	A	A	H	H	A	B	B	H	H	A	B	B	A	H	B	H
2_45453	2	0	H	H	B	H	B	B	H	H	H	H	A	A	H	H	A	B	H	H	H	H	A	A	H	H	B	A	H	B	B	H	B	A	A	H	H	A	B	B	H	H	A	B	B	A	H	B	H
2_45572	2	0	H	H	B	H	B	B	H	H	H	H	A	A	H	H	A	B	H	H	H	H	A	A	H	H	B	A	H	B	B	H	B	A	A	H	H	A	B	B	H	H	A	B	B	A	H	B	H
2_45577	2	0	H	H	B	H	B	B	H	H	H	H	A	A	H	H	A	B	H	H	H	H	A	A	H	H	B	A	H	B	B	H	B	A	A	H	H	A	B	B	H	H	A	B	B	A	H	B	H
2_45730	2	0	H	H	B	H	B	B	H	H	H	H	A	A	H	H	A	B	H	H	H	H	A	A	H	H	B	A	H	B	B	H	B	A	A	H	H	A	B	B	H	H	A	B	B	A	H	B	H
2_45785	2	0	H	H	B	H	B	B	H	H	H	H	A	A	H	H	A	B	H	H	H	H	A	A	H	H	B	A	H	B	B	H	B	A	A	H	H	A	B	B	H	H	A	B	B	A	H	B	H
2_46065	2	0	H	H	B	H	B	B	H	H	H	H	A	A	H	H	A	B	H	H	H	H	A	A	H	H	B	A	H	B	B	H	B	A	A	H	H	A	B	B	H	H	A	B	B	A	H	B	H
2_46090	2	0	H	H	B	H	B	B	H	H	H	H	A	A	H	H	A	B	H	H	H	H	A	A	H	H	B	A	H	B	B	H	B	A	A	H	H	A	B	B	H	H	A	B	B	A	H	B	H
2_46425	2	0	H	H	B	H	B	B	H	H	-	H	A	A	H	H	A	B	H	H	H	H	A	A	H	H	B	A	H	B	B	H	B	A	A	H	H	A	B	B	H	H	A	B	B	A	H	B	H
2_46510	2	0	H	H	B	H	B	B	H	H	H	H	A	A	H	H	A	B	H	H	H	H	A	A	H	H	B	A	H	B	B	H	B	A	A	H	H	A	B	B	H	H	A	B	B	A	H	B	H
2_46601	2	0	H	H	B	H	B	B	H	H	H	H	A	A	H	H	A	B	H	H	H	H	A	A	H	H	B	A	H	B	B	H	B	A	A	H	H	A	B	B	H	H	A	B	B	A	H	B	H
2_46758	2	0	-	H	-	-	-	-	H	H	H	H	A	A	H	H	A	B	H	-	H	H	A	A	H	H	B	A	H	B	B	H	B	A	A	H	H	A	B	B	H	H	A	-	B	A	H	B	H
2_47010	2	0	H	H	B	H	B	B	H	H	H	H	A	A	H	H	A	B	H	H	H	H	A	A	H	H	B	A	H	B	B	H	B	A	A	H	H	A	B	B	H	H	A	B	B	A	H	B	H
2_47068	2	0	H	H	B	H	B	B	H	H	H	H	A	A	H	H	A	B	H	H	H	H	A	A	H	H	B	A	H	B	B	H	B	A	A	H	H	A	B	B	H	H	A	B	B	A	H	B	H
2_47156	2	0	H	H	B	H	B	B	H	H	H	H	A	A	H	H	A	B	H	H	H	H	A	A	H	H	B	A	H	B	B	H	B	A	A	H	H	A	B	B	H	H	A	B	B	A	H	B	H
2_47197	2	0	H	H	B	H	B	B	H	H	H	H	A	A	H	H	A	B	H	H	H	H	A	A	H	H	B	A	H	B	B	H	B	A	A	H	H	A	B	B	H	H	A	B	B	A	H	B	H
2_47300	2	0	H	-	-	-	-	B	H	-	-	H	A	A	H	H	A	B	H	H	H	H	A	A	H	H	B	A	H	B	B	H	B	A	A	H	H	A	B	B	H	H	A	B	B	A	H	B	H
2_47319	2	0	H	H	B	H	B	B	H	H	H	H	A	A	H	H	A	B	H	H	H	H	A	A	H	H	B	A	H	B	B	H	B	A	A	H	H	A	B	B	H	H	A	B	B	A	H	B	H
2_47332	2	0	H	H	B	H	B	B	H	H	H	H	A	A	H	H	A	B	H	H	H	H	A	A	H	H	B	A	H	B	B	H	B	A	A	H	H	A	B	B	H	H	A	B	B	A	H	B	H
2_47474	2	0	H	H	B	H	B	B	H	H	H	H	A	A	H	H	A	B	H	H	H	H	A	A	H	H	B	A	H	B	B	H	B	A	A	H	H	A	B	B	H	H	A	B	B	A	H	B	H
2_47685	2	0	H	H	B	H	B	B	H	H	H	H	A	A	H	H	A	B	-	H	H	H	A	A	H	H	B	A	H	B	B	H	B	A	A	H	H	A	B	B	H	H	A	B	B	A	H	B	H
2_47820	2	0	-	H	B	H	B	B	H	H	H	-	A	A	H	H	A	B	H	H	H	H	A	A	H	H	B	A	H	B	B	H	B	A	A	H	H	A	B	B	H	H	A	B	B	A	H	B	H
2_48320	2	0	H	H	B	H	B	B	H	H	H	H	A	A	H	H	A	B	H	H	H	H	A	A	H	H	B	A	H	B	B	H	B	A	A	H	H	A	B	B	H	H	A	B	B	A	H	B	H
2_48338	2	0	H	H	B	H	B	B	H	H	H	H	A	A	H	H	A	B	H	H	H	H	A	A	H	H	B	A	H	B	B	H	B	A	A	H	H	A	B	B	H	H	A	B	B	A	H	B	H
2_48623	2	0	H	H	B	H	B	B	H	H	H	H	A	A	H	H	A	B	H	H	H	H	A	A	H	H	B	A	H	B	B	H	B	A	A	H	H	A	B	B	H	H	A	B	B	A	H	B	H
2_48780	2	0	H	H	B	H	B	B	H	H	H	H	A	A	H	H	A	B	H	H	H	H	A	A	H	H	B	A	H	B	B	H	B	A	A	H	H	A	B	B	H	H	A	B	B	A	H	B	H
2_48858	2	0	H	H	B	H	B	B	H	H	H	H	A	A	H	H	A	B	H	H	H	H	A	A	H	H	B	A	H	B	B	H	B	A	A	H	H	A	B	B	H	H	A	B	B	A	H	B	H
2_48887	2	0	H	H	B	H	B	B	H	H	H	H	A	A	H	H	A	B	H	H	H	H	A	A	H	H	B	A	H	B	B	H	B	A	A	H	H	A	B	B	H	H	A	B	B	A	H	B	H
2_49031	2	0	H	H	B	H	B	B	H	H	H	H	A	A	H	H	A	B	H	H	H	H	A	A	H	H	B	A	H	B	B	H	B	A	A	H	H	A	B	B	H	H	A	B	B	A	H	B	H
2_49305	2	0	H	H	B	H	B	B	H	H	H	H	A	A	H	H	A	B	H	H	H	H	A	A	H	H	B	A	H	B	B	H	B	A	A	H	H	A	B	B	H	H	A	B	B	A	H	B	H
2_49347	2	0	H	H	B	H	B	B	H	H	H	H	A	A	H	H	A	B	H	H	H	H	A	A	H	H	B	A	H	B	B	H	B	A	A	H	H	A	B	B	H	H	A	B	B	A	H	B	H
2_49511	2	0	H	H	B	H	B	B	H	H	H	H	A	A	H	H	A	B	H	H	H	H	A	A	H	H	B	A	H	B	B	H	B	A	A	H	H	A	B	B	H	H	A	B	B	A	H	B	H
2_49820	2	0	H	H	B	H	B	B	H	H	H	H	A	A	H	H	A	B	H	H	H	H	A	A	H	H	B	A	H	B	B	H	B	A	A	H	H	A	B	B	H	H	A	B	B	A	H	B	H
2_49976	2	0	H	H	B	H	B	B	H	H	H	H	A	A	H	H	A	B	H	H	H	H	A	A	H	H	B	A	H	B	B	H	B	A	A	H	H	A	B	B	H	H	A	B	B	A	H	B	H
2_49996	2	0	H	H	B	H	B	B	H	H	H	H	A	A	H	H	A	B	H	H	H	H	A	A	H	H	B	A	H	B	B	H	B	A	A	H	H	A	B	B	H	H	A	B	B	A	H	B	H
2_50116	2	0	H	H	B	H	B	B	H	H	H	H	A	A	H	H	A	B	H	H	H	H	A	A	H	H	B	A	H	B	B	H	B	A	A	H	H	A	B	B	H	H	A	B	B	A	H	B	H
2_50421	2	0	H	H	B	H	B	B	H	H	H	H	A	A	H	H	A	B	H	H	H	H	A	A	H	H	B	A	H	B	B	H	B	A	A	H	H	A	B	B	H	H	A	B	B	A	H	B	H
2_50460	2	0	H	H	B	H	B	B	H	-	-	H	A	A	H	H	A	B	H	H	H	H	A	A	H	H	B	A	H	B	B	H	B	A	A	H	H	A	B	B	H	H	A	B	B	A	H	B	H
2_51001	2	0	H	H	B	H	B	B	H	H	H	H	A	A	H	H	A	B	H	H	H	H	A	A	H	H	B	A	H	B	B	H	B	A	A	H	H	A	B	B	H	H	A	B	B	A	H	B	H
2_51291	2	0	H	H	B	H	B	B	H	H	H	H	A	A	H	H	A	B	H	H	H	H	A	A	H	H	B	A	H	B	B	H	B	A	A	H	H	A	B	B	H	H	A	B	B	A	H	B	H
2_51491	2	0	H	H	B	H	B	B	H	H	H	H	A	A	H	H	A	B	H	H	H	H	A	A	H	H	B	A	H	B	B	H	B	A	A	H	H	A	B	B	H	H	A	B	B	A	H	B	H
2_51627	2	0	H	H	B	H	B	B	H	H	H	H	A	A	H	H	A	B	H	H	H	H	A	A	H	H	B	A	H	B	B	H	B	A	A	H	H	A	B	B	H	H	A	B	B	A	H	B	H
2_51665	2	0	H	H	B	H	B	B	H	H	H	H	A	A	H	H	A	B	H	H	H	H	A	A	H	H	B	A	H	B	B	H	B	A	A	H	H	A	B	B	H	H	A	B	B	A	H	B	H
2_52072	2	0	H	H	-	-	-	B	H	H	-	H	A	A	H	H	A	B	H	H	H	H	A	A	H	H	B	A	H	B	B	H	B	A	A	H	H	A	B	B	H	H	A	B	B	A	H	B	H
2_53037	2	0	H	H	B	H	B	B	H	H	H	H	A	A	H	H	A	B	H	H	H	H	A	A	H	H	B	A	H	B	B	H	B	A	A	H	H	A	B	B	H	H	A	B	B	A	H	B	H
2_53188	2	0	H	H	B	H	B	B	H	H	H	H	A	A	H	H	A	B	H	H	H	H	A	A	H	H	B	A	H	B	B	H	B	A	A	H	H	A	B	B	H	H	A	B	B	A	H	B	H
2_53303	2	0	H	H	B	H	B	B	H	H	H	H	A	A	H	H	A	B	H	H	H	H	A	A	H	H	B	A	H	B	B	H	B	A	A	H	H	A	B	B	H	H	A	B	B	A	H	B	H
2_53516	2	0	H	H	B	H	B	B	H	H	H	H	A	A	H	H	A	B	H	H	H	H	A	A	H	H	B	A	H	B	B	H	B	A	A	H	H	A	B	B	H	H	A	B	B	A	H	B	H
2_53580	2	0	H	H	B	H	B	B	H	H	H	H	A	A	H	H	A	B	H	H	H	H	A	A	H	H	B	A	H	B	B	H	B	A	A	H	H	A	B	B	H	H	A	B	B	A	H	B	H
2_53713	2	0	H	H	B	H	B	B	H	H	H	H	A	A	H	H	A	B	H	H	H	H	A	A	H	H	B	A	H	B	B	H	B	A	A	H	H	A	B	B	H	H	A	B	B	A	H	B	H
2_53749	2	0	H	H	B	H	B	B	H	H	H	H	A	A	H	H	A	B	H	H	H	H	A	A	H	H	B	A	H	B	B	H	B	A	A	H	H	A	B	B	H	H	A	B	B	A	H	B	H
2_54019	2	0	H	H	B	H	B	B	H	H	H	H	A	A	H	H	A	B	H	H	H	H	A	A	H	H	B	A	H	B	B	H	B	A	A	H	H	A	B	B	H	H	A	B	B	A	H	B	H
2_54033	2	0	H	H	B	H	B	B	H	H	H	H	A	A	H	H	A	B	H	H	H	H	A	A	H	H	B	A	H	B	B	H	B	A	A	H	H	A	B	B	H	H	A	B	B	A	H	B	H
2_54060	2	0	H	H	B	H	B	B	H	H	H	H	A	A	H	H	A	B	H	H	H	H	A	A	H	H	B	A	H	B	B	H	B	A	A	H	H	A	B	B	H	H	A	B	B	A	H	B	H
2_54127	2	0	H	H	B	H	B	B	H	H	H	H	A	A	H	H	A	B	H	H	H	H	A	A	H	H	B	A	H	B	B	H	B	A	A	H	H	A	B	B	H	H	A	B	B	A	H	B	H
2_54413	2	0	H	H	B	H	B	B	H	H	H	H	A	A	H	H	A	B	H	H	H	H	A	A	H	H	B	A	H	B	B	H	B	A	A	H	H	A	B	B	H	H	A	B	B	A	H	B	H
2_54436	2	0	H	H	B	H	B	B	H	H	H	H	A	A	H	H	A	B	H	H	H	H	A	A	H	H	B	A	H	B	B	H	B	A	A	H	H	A	B	B	H	H	A	B	B	A	H	B	H
2_54575	2	0	H	H	B	H	B	B	H	H	H	H	A	A	H	H	A	B	H	H	H	H	A	A	H	H	B	A	H	B	B	H	B	A	A	H	H	A	B	B	H	H	A	B	B	A	H	B	H
2_54691	2	0	H	H	B	H	B	B	H	H	H	H	A	A	H	H	A	B	H	H	H	H	A	A	H	H	B	A	H	B	B	H	B	A	A	H	H	A	B	B	H	H	A	B	B	A	H	B	H
2_54733	2	0	H	H	B	H	B	B	H	-	H	H	A	A	H	H	A	B	H	H	H	H	A	A	H	H	B	A	H	B	B	H	B	A	A	H	H	A	B	B	H	H	A	B	B	A	H	B	H
2_54736	2	0	H	H	B	H	B	B	H	H	H	H	A	A	H	H	A	B	H	H	H	H	A	A	H	H	B	A	H	B	B	H	B	A	A	H	H	A	B	B	H	H	A	B	B	A	H	B	H
2_55318	2	0	H	H	B	H	B	B	H	H	H	H	A	A	H	H	A	B	H	H	H	H	A	A	H	H	B	A	H	B	B	H	B	A	A	H	H	A	B	B	H	H	A	B	B	A	H	B	H
2_55485	2	0	H	H	B	H	B	B	H	H	H	H	A	A	H	H	A	B	H	H	H	H	A	A	H	H	B	A	H	B	B	H	B	A	A	H	H	A	B	B	H	H	A	B	B	A	H	B	H
2_55520	2	0	H	H	B	H	B	B	H	H	H	H	A	A	H	H	A	B	H	H	H	H	A	A	H	H	B	A	H	B	B	H	B	A	A	H	H	A	B	B	H	H	A	B	B	A	H	B	H
1_1418	2	0.84	H	H	B	H	B	B	H	H	H	H	A	A	H	H	A	B	H	H	H	H	A	A	H	H	B	A	H	B	B	H	B	A	A	H	B	A	B	B	H	H	A	B	B	A	H	B	H
2_04142	2	0.84	H	H	B	H	B	B	H	H	H	H	A	A	H	H	A	B	H	H	H	H	A	A	H	H	B	A	H	B	B	H	B	A	A	H	B	A	B	B	H	H	A	B	B	A	H	B	H
2_04143	2	0.84	H	H	B	H	B	B	H	H	H	H	A	A	H	H	A	B	H	H	H	H	A	A	H	H	B	A	H	B	B	H	B	A	A	H	B	A	B	B	H	H	A	B	B	A	H	B	H
2_06083	2	0.84	H	H	B	H	B	B	H	H	H	H	A	A	H	H	A	B	H	H	H	H	A	A	H	H	B	A	H	B	B	H	B	A	A	H	B	A	B	B	H	H	A	B	B	A	H	B	H
2_06084	2	0.84	H	H	B	H	B	B	H	H	H	H	A	A	H	H	A	B	H	H	H	H	A	A	H	H	B	A	H	B	B	H	B	A	A	H	B	A	B	B	H	H	A	B	B	A	H	B	H
2_07644	2	0.84	H	H	B	H	B	B	H	H	H	H	A	A	H	H	A	B	H	H	H	H	A	A	H	H	B	A	H	B	B	H	B	A	A	H	B	A	B	B	H	H	A	B	B	A	H	B	H
2_26620	2	0.84	H	H	B	H	B	B	H	H	H	H	A	A	H	H	A	B	H	H	H	H	A	A	H	H	B	A	H	B	B	H	B	A	A	H	B	A	B	B	H	H	A	B	B	A	H	B	H
2_27382	2	0.84	H	H	B	H	B	B	H	H	H	H	A	A	H	H	A	B	H	H	H	H	A	A	H	H	B	A	H	B	B	H	B	A	A	H	B	A	B	B	H	H	A	B	B	A	H	B	H
2_33905	2	0.84	H	H	B	H	B	B	H	H	H	H	A	A	H	H	A	B	H	H	H	H	A	A	H	H	B	A	H	B	B	H	B	A	A	H	B	A	B	B	H	H	A	B	B	A	H	B	H
2_34298	2	0.84	H	H	B	H	B	B	H	H	H	H	A	A	H	H	A	B	H	H	H	H	A	A	H	H	B	A	H	B	B	H	B	A	A	H	B	A	B	B	H	H	A	B	B	A	H	B	H
2_41512	2	0.84	H	H	B	H	-	B	H	H	H	H	A	A	H	H	A	B	H	H	H	H	A	A	H	H	B	A	H	B	B	H	B	A	A	H	B	A	B	B	H	H	A	B	B	A	H	B	H
2_41798	2	0.84	H	H	B	H	B	-	H	H	H	H	A	A	H	H	A	B	H	H	H	H	A	A	H	H	B	A	H	B	B	H	B	A	A	H	B	A	B	B	H	H	A	B	B	A	H	B	H
2_42806	2	0.84	H	H	B	H	B	B	H	H	H	H	A	A	H	H	A	B	H	H	H	H	A	A	H	H	B	A	H	B	B	H	B	A	A	H	B	A	B	B	H	H	A	B	B	A	H	B	H
2_45073	2	0.84	H	H	B	H	B	B	H	H	H	H	A	A	H	H	A	B	H	H	H	H	A	A	H	H	B	A	H	B	B	H	B	A	A	H	B	A	B	B	H	H	A	B	B	A	H	B	H
2_49405	2	0.84	H	H	B	H	B	B	H	H	H	H	A	A	H	H	A	B	H	H	H	H	A	A	H	H	B	A	H	B	B	H	B	A	A	H	B	A	B	B	H	H	A	B	B	A	H	B	H
2_50431	2	0.84	H	H	B	H	B	B	H	H	H	H	A	A	H	H	A	B	H	H	H	H	A	A	H	H	B	A	H	B	B	H	B	A	A	H	B	A	B	B	H	H	A	B	B	A	H	B	H
2_51061	2	0.84	H	H	B	H	B	B	H	H	H	H	A	A	H	H	A	B	H	H	H	H	A	A	H	H	B	A	H	B	B	H	B	A	A	H	B	A	B	B	H	H	A	B	B	A	H	B	H
2_54506	2	0.84	H	H	B	H	B	B	H	H	H	H	A	A	H	H	A	B	H	H	H	H	A	A	H	H	B	A	H	B	B	H	B	A	A	H	B	A	B	B	H	H	A	B	B	A	H	B	H
2_55245	2	0.84	H	H	B	H	B	B	H	H	H	H	A	A	H	H	A	B	H	H	H	H	A	A	H	H	B	A	H	B	B	H	B	A	A	H	B	A	B	B	H	H	A	B	B	A	H	B	H
2_02507	2	1.26	H	H	B	H	B	B	H	H	H	H	A	A	H	H	A	B	H	H	H	H	A	A	H	H	B	A	H	B	B	H	B	A	H	H	B	A	B	B	H	H	A	B	B	A	H	B	H
2_33844	2	1.26	H	H	B	H	B	B	H	H	H	H	A	A	H	H	A	B	H	H	H	H	A	A	H	H	B	A	H	B	B	H	B	A	H	H	B	A	B	B	H	H	A	B	B	A	H	B	H
2_11667	2	2.101	H	H	B	H	B	B	H	H	H	H	A	A	H	H	A	B	H	H	H	H	A	A	H	H	B	A	H	B	B	H	B	A	H	H	B	A	B	B	H	H	A	B	B	A	H	B	H
2_17609	2	2.521	H	H	B	H	B	B	H	H	H	H	A	A	H	H	A	B	H	H	H	H	A	A	H	H	B	A	H	B	B	H	B	A	H	H	B	A	B	B	H	A	A	B	B	A	H	B	H
2_38286	2	2.521	H	H	B	H	B	B	H	H	H	H	A	A	H	H	A	B	H	H	H	H	A	A	H	H	B	A	H	B	B	H	B	A	H	H	B	A	B	B	H	A	A	B	B	A	H	B	H
2_43494	2	2.521	H	H	B	H	B	B	H	H	H	H	A	A	H	H	A	B	H	H	H	H	A	A	H	H	B	A	H	B	B	H	B	A	H	H	B	A	B	B	H	A	A	B	B	A	H	B	H
2_39409	2	2.941	-	H	B	H	B	B	H	-	-	-	A	A	H	H	A	B	H	H	H	H	A	A	H	H	B	A	H	B	B	H	B	A	H	H	B	A	B	B	H	A	A	B	B	A	H	B	H
2_08900	2	3.361	H	H	B	H	B	B	H	H	H	H	A	A	H	H	A	B	H	H	H	H	A	A	H	H	B	A	H	B	B	H	B	A	H	H	B	A	B	B	H	A	A	B	B	A	H	B	H
2_28044	2	3.361	H	H	B	H	B	B	H	H	H	H	A	A	H	H	A	B	H	H	H	H	A	A	H	H	B	A	H	B	B	H	B	A	H	H	B	A	B	B	H	A	A	B	B	A	H	B	H
2_48981	2	3.361	H	H	B	H	B	B	H	H	H	H	A	A	H	H	A	B	H	H	H	H	A	A	H	H	B	A	H	B	B	H	B	A	H	H	B	A	B	B	H	A	A	B	B	A	H	B	H
2_24433	2	3.781	H	H	B	H	B	-	H	H	H	H	A	A	H	H	A	-	H	H	H	H	A	A	B	H	B	A	H	B	B	H	B	A	H	H	B	A	B	B	H	A	A	B	B	A	H	B	H
1_0719	2	4.202	H	H	B	H	B	B	H	H	H	H	A	A	H	H	A	B	H	H	H	H	A	A	B	H	B	A	H	B	B	H	B	A	H	H	B	A	B	B	H	A	A	B	B	A	H	B	H
2_01977	2	4.202	H	H	B	H	B	B	H	H	H	H	A	A	H	H	A	B	H	H	H	H	A	A	B	H	B	A	H	B	B	H	B	A	H	H	B	A	B	B	H	A	A	B	B	A	H	B	H
2_12913	2	4.202	H	H	B	H	B	B	H	H	H	H	A	A	H	H	A	B	H	H	H	H	A	A	B	H	B	A	H	B	B	H	B	A	H	H	B	A	B	B	H	A	A	B	B	A	H	B	H
2_12914	2	4.202	H	H	B	H	B	B	H	H	H	H	A	A	H	H	A	B	H	H	H	H	A	A	B	H	B	A	H	B	B	H	B	A	H	H	B	A	B	B	H	A	A	B	B	A	H	B	H
2_19528	2	4.202	H	H	B	H	B	B	H	H	H	H	A	A	H	H	A	B	H	H	H	H	A	A	B	H	B	A	H	B	B	H	B	A	H	H	B	A	B	B	H	A	A	B	B	A	H	B	H
2_21023	2	4.202	H	H	B	H	B	B	H	H	H	H	A	A	H	H	A	B	H	H	H	H	A	A	B	H	B	A	H	B	B	H	B	A	H	H	B	A	B	B	H	A	A	B	B	A	H	B	H
2_24418	2	4.202	H	-	-	-	-	B	H	H	-	H	A	A	H	H	A	B	H	H	H	H	A	A	B	H	B	A	H	B	B	H	B	A	H	H	B	A	B	B	H	A	A	B	B	A	H	B	H
2_25316	2	4.202	H	H	B	H	B	B	H	H	H	H	A	A	H	H	A	B	H	H	H	H	A	A	B	H	B	A	H	B	B	H	B	A	H	H	B	A	B	B	H	A	A	B	B	A	H	B	H
2_25317	2	4.202	H	H	B	H	B	B	H	H	H	H	A	A	H	H	A	B	H	H	H	H	A	A	B	H	B	A	H	B	B	H	B	A	H	H	B	A	B	B	H	A	A	B	B	A	H	B	H
2_25318	2	4.202	H	H	B	H	B	B	H	H	H	H	A	A	H	H	A	B	H	H	H	H	A	A	B	H	B	A	H	B	B	H	B	A	H	H	B	A	B	B	H	A	A	B	B	A	H	B	H
2_27952	2	4.202	H	H	B	H	B	B	H	H	H	H	A	A	H	H	A	B	H	H	H	H	A	A	B	H	B	A	H	B	B	H	B	A	H	H	B	A	B	B	H	A	A	B	B	A	H	B	H
2_28751	2	4.202	H	H	B	H	B	B	H	H	H	H	A	A	H	H	A	B	H	H	H	H	A	A	B	H	B	A	H	B	B	H	B	A	H	H	B	A	B	B	H	A	A	B	B	A	H	B	H
2_28807	2	4.202	H	H	-	H	-	B	H	H	H	H	A	A	H	H	A	B	H	H	H	H	A	A	B	H	B	A	H	B	B	H	B	A	H	H	B	A	B	B	H	A	A	B	B	A	H	B	H
2_28808	2	4.202	H	H	B	H	B	B	H	H	H	H	A	A	H	H	A	B	H	H	H	H	A	A	B	H	B	A	H	B	B	H	B	A	H	H	B	A	B	B	H	A	A	B	B	A	H	B	H
2_28934	2	4.202	H	H	B	H	B	B	H	H	H	H	A	A	H	H	A	B	H	H	H	H	A	A	B	H	B	A	H	B	B	H	B	A	H	H	B	A	B	B	H	A	A	B	B	A	H	B	H
2_29260	2	4.202	H	H	B	H	B	B	H	H	H	H	A	A	H	H	A	B	H	H	H	H	A	A	B	H	B	A	H	B	B	H	B	A	H	H	B	A	B	B	H	A	A	B	B	A	H	B	H
2_29261	2	4.202	H	H	B	H	B	B	H	H	H	H	A	A	H	H	A	B	H	H	H	H	A	A	B	H	B	A	H	B	B	H	B	A	H	H	B	A	B	B	H	A	A	B	B	A	H	B	H
2_29262	2	4.202	H	H	B	H	B	B	H	H	H	H	A	A	H	H	A	B	H	H	H	H	A	A	B	H	B	A	H	B	B	H	B	A	H	H	B	A	B	B	H	A	A	B	B	A	H	B	H
2_32239	2	4.202	H	H	B	H	B	B	H	H	H	H	A	A	H	H	A	B	H	H	H	H	A	A	B	H	B	A	H	B	B	H	B	A	H	H	B	A	B	B	H	A	A	B	B	A	H	B	H
2_32883	2	4.202	H	H	B	H	B	B	H	H	H	H	A	A	H	H	A	B	H	H	H	H	A	A	B	H	B	A	H	B	B	H	B	A	H	H	B	A	B	B	H	A	A	B	B	A	H	B	H
2_34212	2	4.202	H	H	B	H	B	B	H	H	H	H	A	A	H	H	A	B	H	H	H	H	A	A	B	H	B	A	H	B	B	H	B	A	H	H	B	A	B	B	H	A	A	B	B	A	H	B	H
2_36824	2	4.202	H	H	B	H	B	B	H	H	H	H	A	A	H	H	A	B	H	H	H	H	A	A	B	H	B	A	H	B	B	H	B	A	H	H	B	A	B	B	H	A	A	B	B	A	H	B	H
2_36888	2	4.202	H	H	B	H	B	B	H	H	H	H	A	A	H	H	A	B	H	H	H	H	A	A	B	H	B	A	H	B	B	H	B	A	H	H	B	A	B	B	H	A	A	B	B	A	H	B	H
2_39039	2	4.202	H	H	B	H	B	B	H	H	H	H	A	A	H	H	A	B	H	H	H	H	A	A	B	H	B	A	H	B	B	H	B	A	H	H	B	A	B	B	H	A	A	B	B	A	H	B	H
2_40193	2	4.202	H	H	B	H	B	B	H	H	H	H	A	A	H	H	A	B	H	H	H	H	A	A	B	H	B	A	H	B	B	H	B	A	H	H	B	A	B	B	H	A	A	B	B	A	H	B	H
2_40546	2	4.202	H	H	B	H	B	B	H	H	H	H	A	A	H	H	A	B	H	H	H	H	A	A	B	H	B	A	H	B	B	H	B	A	H	H	B	A	B	B	H	A	A	B	B	A	H	B	H
2_40973	2	4.202	H	H	B	H	B	B	H	H	H	H	A	A	H	H	A	B	H	H	H	H	A	A	B	H	B	A	H	B	B	H	B	A	H	H	B	A	B	B	H	A	A	B	B	A	H	B	H
2_45173	2	4.202	H	H	B	H	B	B	H	H	H	H	A	A	H	H	A	B	H	H	H	H	A	A	B	H	B	A	H	B	B	H	B	A	H	H	B	A	B	B	H	A	A	B	B	A	H	B	H
2_47473	2	4.202	H	H	B	H	B	B	H	H	H	H	A	A	H	H	A	B	H	H	H	H	A	A	B	H	B	A	H	B	B	H	B	A	H	H	B	A	B	B	H	A	A	B	B	A	H	B	H
2_48607	2	4.202	H	H	B	H	B	B	H	H	H	H	A	A	H	H	A	B	H	H	H	H	A	A	B	H	B	A	H	B	B	H	B	A	H	H	B	A	B	B	H	A	A	B	B	A	H	B	H
2_48827	2	4.202	H	H	B	H	B	B	H	H	H	H	A	A	H	H	A	B	H	H	H	H	A	A	B	H	B	A	H	B	B	H	B	A	H	H	B	A	B	B	H	A	A	B	B	A	H	B	H
2_48909	2	4.202	H	H	B	H	B	B	H	H	H	H	A	A	H	H	A	B	H	H	H	H	A	A	B	H	B	A	H	B	B	H	B	A	H	H	B	A	B	B	H	A	A	B	B	A	H	B	H
2_52289	2	4.202	H	H	B	H	B	B	H	H	H	H	A	A	H	H	A	B	H	H	H	H	A	A	B	H	B	A	H	B	B	H	B	A	H	H	B	A	B	B	H	A	A	B	B	A	H	B	H
2_54499	2	4.202	H	H	B	H	B	B	H	H	H	H	A	A	H	H	A	B	H	H	H	H	A	A	B	H	B	A	H	B	B	H	B	A	H	H	B	A	B	B	H	A	A	B	B	A	H	B	H
1_0006	2	4.622	-	-	B	-	B	B	H	-	-	H	A	A	H	H	A	B	H	H	H	H	A	A	H	H	B	A	H	B	B	H	B	A	H	H	B	A	B	B	H	A	A	B	B	A	H	B	H
2_00960	2	4.622	H	H	B	H	B	B	H	H	H	H	A	A	H	H	A	B	H	H	H	H	A	A	H	H	B	A	H	B	B	H	B	A	H	H	B	A	B	B	H	A	A	B	B	A	H	B	H
2_00961	2	4.622	H	H	B	H	B	B	H	H	H	H	A	A	H	H	A	B	H	H	H	H	A	A	H	H	B	A	H	B	B	H	B	A	H	H	B	A	B	B	H	A	A	B	B	A	H	B	H
2_01183	2	4.622	H	H	B	H	B	B	H	H	H	H	A	A	H	H	A	B	H	H	H	H	A	A	H	H	B	A	H	B	B	H	B	A	H	H	B	A	B	B	H	A	A	B	B	A	H	B	H
2_01184	2	4.622	H	H	B	H	B	B	H	H	H	H	A	A	H	H	A	B	H	H	H	H	A	A	H	H	B	A	H	B	B	H	B	A	H	H	B	A	B	B	H	A	A	B	B	A	H	B	H
2_01648	2	4.622	H	H	B	H	B	B	H	H	H	H	A	A	H	H	A	B	H	H	H	H	A	A	H	H	B	A	H	B	B	H	B	A	H	H	B	A	B	B	H	A	A	B	B	A	H	B	H
2_04392	2	4.622	H	H	B	H	B	B	H	H	H	H	A	A	H	H	A	B	H	H	H	H	A	A	H	H	B	A	H	B	B	H	B	A	H	H	B	A	B	B	H	A	A	B	B	A	H	B	H
2_05216	2	4.622	H	H	B	H	B	B	H	H	H	H	A	A	H	H	A	B	H	H	H	H	A	A	H	H	B	A	H	B	B	H	B	A	H	H	B	A	B	B	H	A	A	B	B	A	H	B	H
2_07217	2	4.622	H	H	B	H	B	B	H	H	H	H	A	A	H	H	A	B	H	H	H	H	A	A	H	H	B	A	H	B	B	H	B	A	H	H	B	A	B	B	H	A	A	B	B	A	H	B	H
2_08901	2	4.622	H	H	B	H	B	B	H	H	H	H	A	A	H	H	A	B	H	H	H	H	A	A	H	H	B	A	H	B	B	H	B	A	H	H	B	A	B	B	H	A	A	B	B	A	H	B	H
2_11719	2	4.622	H	H	B	H	B	B	H	H	H	H	A	A	H	H	A	B	H	H	H	H	A	A	H	H	B	A	H	B	B	H	B	A	H	H	B	A	B	B	H	A	A	B	B	A	H	B	H
2_12512	2	4.622	H	H	B	H	B	B	H	H	H	H	A	A	H	H	A	B	H	H	H	H	A	A	H	H	B	A	H	B	B	H	B	A	H	H	B	A	B	B	H	A	A	B	B	A	H	B	H
2_12513	2	4.622	H	H	B	H	B	B	H	H	-	H	A	A	H	H	A	B	H	H	H	H	A	A	H	H	B	A	H	B	B	H	B	A	H	H	B	A	B	B	H	A	A	B	B	A	H	B	H
2_13397	2	4.622	H	H	B	H	B	B	H	H	H	H	A	A	H	H	A	B	H	H	H	H	A	A	H	H	B	A	H	B	B	H	B	A	H	H	B	A	B	-	H	A	A	B	B	A	H	B	H
2_13599	2	4.622	H	H	B	H	B	B	H	H	H	H	A	A	H	H	A	B	H	H	H	H	A	A	H	H	B	A	H	B	B	H	B	A	H	H	B	A	B	B	H	A	A	B	B	A	H	B	H
2_14052	2	4.622	H	H	B	H	B	B	H	H	H	H	A	A	H	H	A	B	H	H	H	H	A	A	H	H	B	A	H	B	B	H	B	A	H	H	B	A	B	B	H	A	A	B	B	A	H	B	H
2_14053	2	4.622	H	H	B	H	B	B	H	H	H	H	A	A	H	H	A	B	H	H	H	H	A	A	H	H	B	A	H	B	B	H	B	A	H	H	B	A	B	B	H	A	A	B	B	A	H	B	H
2_14897	2	4.622	H	H	B	H	B	B	H	H	H	H	A	A	H	H	A	B	H	H	H	H	A	A	H	H	B	A	H	B	B	H	B	A	H	H	B	A	B	B	H	A	A	B	B	A	H	B	H
2_14898	2	4.622	H	H	B	H	B	B	H	H	H	H	A	A	H	H	A	B	H	H	H	H	A	A	H	H	B	A	H	B	B	H	B	A	H	H	B	A	B	B	H	A	A	B	B	A	H	B	H
2_16244	2	4.622	H	H	B	H	B	B	H	H	H	H	A	A	H	H	A	B	H	H	H	H	A	A	H	H	B	A	H	B	B	H	B	A	H	H	B	A	B	B	H	A	A	B	B	A	H	B	H
2_16245	2	4.622	H	H	B	H	B	B	H	H	H	H	A	A	H	H	A	B	H	H	H	H	A	A	H	H	B	A	H	B	B	H	B	A	H	H	B	A	B	B	H	A	A	B	B	A	H	B	H
2_16804	2	4.622	H	H	B	H	B	B	H	H	H	H	A	A	H	H	A	B	H	H	H	H	A	A	H	H	B	A	H	B	B	H	B	A	H	H	B	A	B	B	H	A	A	B	B	A	H	B	H
2_16805	2	4.622	H	H	B	H	B	B	H	H	H	H	A	A	H	H	A	B	H	H	H	H	A	A	H	H	B	A	H	B	B	H	B	A	H	H	B	A	B	B	H	A	A	B	B	A	H	B	H
2_16806	2	4.622	H	H	B	H	B	B	H	H	H	H	A	A	H	H	A	B	H	H	H	H	A	A	H	H	B	A	H	B	B	H	B	A	H	H	B	A	B	B	H	A	A	B	B	A	H	B	H
2_16807	2	4.622	H	H	B	H	B	B	H	H	H	H	A	A	H	H	A	B	H	H	H	H	A	A	H	H	B	A	H	B	B	H	B	A	H	H	B	A	B	B	H	A	A	B	B	A	H	B	H
2_23349	2	4.622	H	H	B	H	B	B	H	H	H	H	A	A	H	H	A	B	H	H	H	H	A	A	H	H	B	A	H	B	B	H	B	A	H	H	B	A	B	B	H	A	A	B	B	A	H	B	H
2_23933	2	4.622	H	H	B	H	B	B	H	H	H	H	A	A	H	H	A	B	H	H	H	H	A	A	H	H	B	A	H	B	B	H	B	A	H	H	B	A	B	B	H	A	A	B	B	A	H	B	H
2_24545	2	4.622	H	H	B	-	B	B	H	H	-	H	A	A	H	H	A	B	H	H	H	H	A	A	H	H	B	A	H	B	B	H	B	A	H	H	B	A	B	B	H	A	A	B	B	A	H	B	H
2_29412	2	4.622	H	H	B	H	B	B	H	H	H	H	A	A	H	H	A	B	H	H	H	H	A	A	H	H	B	A	H	B	B	H	B	A	H	H	B	A	B	B	H	A	A	B	B	A	H	B	H
2_29890	2	4.622	H	H	B	H	B	B	H	H	H	H	A	A	H	H	A	B	H	H	H	H	A	A	H	H	B	A	H	B	B	H	B	A	H	H	B	A	B	B	H	A	A	B	B	A	H	B	H
2_34089	2	4.622	H	H	B	H	B	B	H	H	H	H	A	A	H	H	A	B	H	H	H	H	A	A	H	H	B	A	H	B	B	H	B	A	H	H	B	A	B	B	H	A	A	B	B	A	H	B	H
2_38525	2	4.622	H	H	B	H	B	B	H	H	H	H	A	A	H	H	A	B	H	H	H	H	A	A	H	H	B	A	H	B	B	H	B	A	H	H	B	-	B	B	H	A	A	B	B	A	H	B	H
2_38592	2	4.622	H	H	B	H	B	B	H	H	H	H	A	A	H	H	A	B	H	H	H	H	A	A	H	H	B	A	H	B	B	H	B	A	H	H	B	A	B	B	H	A	A	B	B	A	H	B	H
2_39089	2	4.622	H	H	B	H	B	B	H	H	H	H	A	A	H	H	A	B	H	H	H	H	A	A	H	H	B	A	H	B	B	H	B	A	H	H	B	A	B	B	H	A	A	B	B	A	H	B	H
2_39308	2	4.622	H	H	B	H	B	B	H	H	H	H	A	A	H	H	A	B	H	H	H	H	A	A	H	H	B	A	H	B	B	H	B	A	H	H	B	A	B	B	H	A	A	B	B	A	H	B	H
2_39476	2	4.622	H	H	B	H	B	B	H	H	H	H	A	A	H	H	A	B	H	H	H	H	A	A	H	H	B	A	H	B	-	H	B	A	H	H	B	A	B	B	H	A	A	B	B	A	H	B	H
2_39978	2	4.622	H	H	B	H	B	B	H	H	H	H	A	A	H	H	A	B	H	H	H	H	A	A	H	H	B	A	H	B	B	H	B	A	H	H	B	A	B	B	H	A	A	B	B	A	H	B	H
2_40541	2	4.622	-	-	B	H	B	B	H	H	H	-	A	A	H	H	A	B	H	H	H	H	A	A	H	H	B	A	H	B	B	H	B	A	H	H	B	A	B	B	H	A	A	B	B	A	H	B	H
2_40641	2	4.622	H	H	B	H	B	B	H	H	H	H	A	A	H	H	A	B	H	H	H	H	A	A	H	H	B	A	H	B	B	H	B	A	H	H	B	A	B	B	H	A	A	B	B	A	H	B	H
2_40747	2	4.622	H	H	B	H	B	B	H	H	H	H	A	A	H	H	A	B	H	H	H	H	A	A	H	H	B	A	H	B	B	H	B	A	H	H	B	A	B	B	H	A	A	B	B	A	H	B	H
2_42305	2	4.622	H	H	B	H	B	B	H	H	H	H	A	A	H	H	A	B	H	H	H	H	A	A	H	H	B	A	H	B	B	H	B	A	H	H	B	A	B	B	H	A	A	B	B	A	H	B	H
2_43603	2	4.622	H	H	B	H	B	B	H	H	H	H	A	A	H	H	A	B	H	H	H	H	A	A	H	H	B	A	H	B	B	H	B	A	H	H	B	A	B	B	H	A	A	B	B	A	H	B	H
2_43838	2	4.622	H	H	B	H	B	B	H	H	H	H	A	A	H	H	A	B	H	H	H	H	A	A	H	H	B	A	H	B	B	H	B	A	H	H	B	A	B	B	H	A	A	B	B	A	H	B	H
2_43968	2	4.622	H	H	B	H	B	B	H	H	H	H	A	A	H	H	A	B	H	H	H	H	A	A	H	H	B	A	H	B	B	H	B	A	H	H	B	A	B	B	H	A	A	B	B	A	H	B	H
2_44680	2	4.622	H	H	B	H	B	B	H	H	H	H	A	A	H	H	A	B	H	H	H	H	A	A	H	H	B	A	H	B	B	H	B	A	H	H	B	A	B	B	H	A	A	B	B	A	H	B	H
2_45079	2	4.622	H	H	B	H	B	B	H	H	H	H	A	A	H	H	A	B	H	H	H	H	A	A	H	H	B	A	H	B	B	H	B	A	H	H	B	A	B	B	H	A	A	B	B	A	H	B	H
2_45108	2	4.622	H	H	B	H	B	B	H	H	H	H	A	A	H	H	A	B	H	H	H	H	A	A	H	H	B	A	H	B	B	H	B	A	H	H	B	A	B	B	H	A	A	B	B	A	H	B	H
2_45871	2	4.622	H	H	B	H	B	B	H	H	H	H	A	A	H	H	A	B	H	H	H	H	A	A	H	H	B	A	H	B	B	H	B	A	H	H	B	A	B	B	H	A	A	B	B	A	H	B	H
2_46508	2	4.622	H	H	B	H	B	B	H	H	H	H	A	A	H	H	A	B	H	H	H	H	A	A	H	H	B	A	H	B	B	H	B	A	H	H	B	A	B	B	H	A	A	B	B	A	H	B	H
2_48079	2	4.622	H	H	B	H	B	B	H	H	H	H	A	A	H	H	A	B	H	H	H	H	A	A	H	H	B	A	H	B	B	H	B	A	H	H	B	A	B	B	H	A	A	B	B	A	H	B	H
2_48295	2	4.622	H	H	B	H	B	B	H	H	H	H	A	A	H	H	A	B	H	H	H	H	A	A	H	H	B	A	H	B	B	H	B	A	H	H	B	A	B	B	H	A	A	B	B	A	H	B	H
2_48455	2	4.622	H	H	-	H	-	B	H	H	H	H	A	A	H	H	A	B	H	H	H	H	A	A	H	H	B	A	H	B	B	H	B	A	H	H	B	A	B	B	H	A	A	B	B	A	H	B	H
2_49834	2	4.622	H	H	B	H	B	B	H	H	H	H	A	A	H	H	A	B	H	H	H	H	A	A	H	H	B	A	H	B	B	H	B	A	H	H	B	A	B	B	H	A	A	B	B	A	H	B	H
2_50519	2	4.622	H	H	-	H	B	B	H	H	H	H	A	A	H	H	A	B	H	H	H	H	A	A	H	H	B	A	H	B	B	H	B	A	H	H	B	A	B	B	H	A	A	B	B	A	H	B	H
2_51177	2	4.622	H	H	B	H	B	B	H	H	H	H	A	A	H	H	A	B	H	H	H	H	A	A	H	H	B	A	H	B	B	H	B	A	H	H	B	A	B	B	H	A	A	B	B	A	H	B	H
2_52511	2	4.622	H	H	B	H	B	B	H	H	H	H	A	A	H	H	A	B	H	H	H	H	A	A	H	H	B	A	H	B	B	H	B	A	H	H	B	A	B	B	H	A	A	B	B	A	H	B	H
2_52789	2	4.622	H	H	B	H	B	B	H	H	H	H	A	A	H	H	A	B	H	H	H	H	A	A	H	H	B	A	H	B	B	H	B	A	H	H	B	A	B	B	H	A	A	B	B	A	H	B	H
2_54312	2	4.622	H	H	B	H	B	B	H	H	H	H	A	A	H	H	A	B	H	H	H	H	A	A	H	H	B	A	H	B	B	H	B	A	H	H	B	A	B	B	H	A	A	B	B	A	H	B	H
2_54314	2	4.622	H	H	B	H	B	B	H	H	H	H	A	A	H	H	A	B	H	H	H	H	A	A	H	H	B	A	H	B	B	H	B	A	H	H	B	A	B	B	H	A	A	B	B	A	H	B	H
2_54857	2	4.622	H	H	B	H	B	B	H	H	H	H	A	A	H	H	A	B	H	H	H	H	A	A	H	H	B	A	H	B	B	H	B	A	H	H	B	A	B	B	H	A	A	B	B	A	H	B	H
2_55524	2	4.622	H	H	B	H	B	B	H	H	H	H	A	A	H	H	A	B	H	H	H	H	A	A	H	H	B	A	H	B	B	H	B	A	H	H	B	A	B	B	H	A	A	B	B	A	H	B	H
2_53822	2	5.126	H	H	H	H	B	B	H	H	H	H	A	A	H	H	A	B	H	H	H	H	A	A	H	H	B	A	H	B	B	H	B	A	H	H	B	A	B	B	H	A	A	B	B	A	H	B	H
2_32391	2	6.05	H	H	-	H	H	B	H	H	-	H	A	A	H	H	A	B	H	H	H	H	A	A	B	H	B	A	H	B	B	H	B	A	H	H	B	A	B	B	H	A	A	B	B	A	H	B	H
2_30605	2	6.975	H	H	B	H	B	B	H	H	H	H	A	A	H	H	A	B	H	H	H	H	A	A	B	H	B	A	H	B	B	H	B	A	H	H	B	A	B	B	H	A	A	B	B	A	H	B	H
2_34884	2	6.975	H	H	B	H	B	B	H	H	H	H	A	A	H	H	A	B	H	H	H	H	A	A	B	H	B	A	H	B	B	H	B	A	H	H	B	A	B	B	H	A	A	B	B	A	H	B	H
2_34885	2	6.975	H	H	B	H	B	B	H	H	H	H	A	A	H	H	A	B	H	H	H	H	A	A	B	H	B	A	H	B	B	H	B	A	H	H	B	A	B	B	H	A	A	B	B	A	H	B	H
2_34931	2	6.975	H	H	B	H	B	B	H	H	H	H	A	A	H	H	A	B	H	H	H	H	A	A	B	H	B	A	H	B	B	H	B	A	H	H	B	A	B	B	H	A	A	B	B	A	H	B	H
2_35174	2	6.975	H	H	B	H	B	B	H	H	H	H	A	A	H	H	A	B	H	H	H	H	A	A	B	H	B	A	H	B	B	H	B	A	H	H	B	A	B	B	H	A	A	B	B	A	H	B	H
2_36443	2	6.975	H	H	B	H	B	B	H	H	H	H	A	A	H	H	A	B	H	H	H	H	A	A	B	H	B	A	H	B	B	H	B	A	H	H	B	A	B	B	H	A	A	B	B	A	H	B	H
2_36444	2	6.975	H	H	B	H	B	B	H	H	H	H	A	A	H	H	A	B	H	H	H	H	A	A	B	H	B	A	H	B	B	H	B	A	H	H	B	A	B	B	H	A	A	B	B	A	H	B	H
2_36503	2	6.975	H	H	B	H	B	B	H	H	H	H	A	A	H	H	A	B	H	H	H	H	A	A	B	H	B	A	H	B	B	H	B	A	H	H	B	A	B	B	H	A	A	B	B	A	H	B	H
2_36504	2	6.975	H	H	B	H	B	B	H	H	H	H	A	A	H	H	A	B	H	H	H	H	A	A	B	H	B	A	H	B	B	H	B	A	H	H	B	A	B	B	H	A	A	B	B	A	H	B	H
2_36962	2	6.975	H	H	B	H	B	B	H	H	H	H	A	A	H	H	A	B	H	H	H	H	A	A	B	H	B	A	H	B	B	H	B	A	H	H	B	A	B	B	H	A	A	B	B	A	H	B	H
2_37349	2	6.975	H	H	B	H	B	B	H	H	H	H	A	A	H	H	A	B	H	H	H	H	A	A	B	H	B	A	H	B	B	H	B	A	H	H	B	A	B	B	H	A	A	B	B	A	H	B	H
2_37473	2	6.975	H	H	B	H	B	B	H	H	H	H	A	A	H	H	A	B	H	H	H	H	A	A	B	H	B	A	H	B	B	H	B	A	H	H	B	A	B	B	H	A	A	B	B	A	H	B	H
2_38479	2	6.975	H	H	B	H	B	B	H	H	H	H	A	A	H	H	A	B	H	H	H	H	A	A	B	H	B	A	H	B	B	H	B	A	H	H	B	A	B	B	H	A	A	B	B	A	H	B	H
2_40984	2	6.975	H	H	B	H	B	B	H	H	H	H	A	A	H	H	A	B	H	H	H	H	A	A	B	H	B	A	H	B	-	H	B	A	H	H	B	A	B	B	H	A	A	B	B	A	H	B	H
2_48715	2	6.975	H	H	B	H	B	B	H	H	H	H	A	A	H	H	A	B	H	H	H	H	A	A	B	H	B	A	H	B	B	H	B	A	H	H	B	A	B	B	H	A	A	B	B	A	H	B	H
2_49100	2	6.975	H	H	B	H	B	B	H	H	H	H	A	A	H	H	A	B	H	H	H	H	A	A	B	H	B	A	H	B	B	H	B	A	H	H	B	A	B	B	H	A	A	B	B	A	H	B	H
2_50294	2	6.975	H	H	B	H	B	B	H	H	H	H	A	A	H	H	A	B	H	H	H	H	A	A	B	H	B	A	H	B	B	H	B	A	H	H	B	A	B	B	H	A	A	B	B	A	H	B	H
2_50566	2	7.395	H	H	B	H	B	B	H	H	H	H	A	A	H	H	A	B	H	H	H	H	A	A	B	H	B	A	H	B	B	H	B	A	H	H	B	A	B	B	H	A	A	B	B	A	H	B	H
2_38255	2	7.815	H	H	B	H	B	B	H	H	H	H	A	A	H	H	A	B	H	H	H	H	A	A	B	H	B	A	H	B	B	H	B	A	H	H	B	A	B	B	H	A	A	B	B	A	H	B	H
2_41600	2	7.815	H	H	B	H	B	B	H	H	H	H	A	A	H	H	A	B	H	H	H	H	A	A	B	H	B	A	H	B	B	H	B	A	H	H	B	A	B	B	H	A	A	B	B	A	H	B	H
2_48284	2	7.815	H	H	B	H	B	B	H	H	H	H	A	A	H	H	A	B	H	H	H	H	A	A	B	H	B	A	H	B	B	H	B	A	H	H	B	A	B	B	H	A	A	B	B	A	H	B	H
2_48609	2	7.815	H	H	B	H	B	B	H	H	H	H	A	A	H	H	A	B	H	H	H	H	A	A	B	H	B	A	H	B	B	H	B	A	H	H	B	A	B	B	H	A	A	B	B	A	H	B	H
2_51601	2	7.815	H	H	B	H	B	B	H	H	H	H	A	A	H	H	A	B	H	H	H	H	A	A	B	H	B	A	H	B	B	H	B	A	H	H	B	A	B	B	H	A	A	B	B	A	H	B	H
2_01786	2	8.656	H	H	B	H	B	B	H	H	H	H	A	A	H	H	A	B	H	H	B	H	A	A	B	H	B	A	H	B	B	H	B	A	H	H	B	A	B	B	H	A	A	B	B	A	H	B	H
2_06415	2	8.656	H	H	B	H	B	B	H	H	H	H	A	A	H	H	A	B	H	H	B	H	A	A	B	H	B	A	H	B	B	H	B	A	H	H	B	A	B	B	H	A	A	B	B	A	H	B	H
2_10391	2	8.656	H	H	B	H	B	B	H	H	H	H	A	A	H	H	A	B	H	H	B	H	A	A	B	H	B	A	H	B	B	H	B	A	H	H	B	A	B	B	H	A	A	B	B	A	H	B	H
2_10392	2	8.656	H	H	B	H	B	B	H	H	H	H	A	A	H	H	A	B	H	H	B	H	A	A	B	H	B	A	H	B	B	H	B	A	H	H	B	A	B	B	H	A	A	B	B	A	H	B	H
2_21070	2	8.656	H	H	B	H	B	B	H	H	H	H	A	A	H	H	A	B	H	H	B	H	A	A	B	H	B	A	H	B	B	H	B	A	H	H	B	A	B	B	H	A	A	B	B	A	H	B	H
2_24252	2	8.656	H	H	B	H	B	B	H	H	H	H	A	A	H	H	A	B	H	H	B	H	A	A	B	H	B	A	H	B	B	H	B	A	H	H	B	A	B	B	H	A	A	B	B	A	H	B	H
2_26309	2	8.656	H	H	B	H	B	B	H	H	H	H	A	A	H	H	A	B	H	H	B	H	A	A	B	H	B	A	H	B	B	H	B	A	H	H	B	A	B	B	H	A	A	B	B	A	H	B	H
2_29360	2	8.656	H	H	B	H	B	B	H	H	H	H	A	A	H	H	A	B	H	H	B	H	A	A	B	H	B	A	H	B	B	H	B	A	H	H	B	A	B	B	H	A	A	B	B	A	H	B	H
2_31031	2	8.656	H	H	B	H	B	B	H	H	H	H	A	A	H	H	A	B	H	H	B	H	A	A	B	H	B	A	H	B	B	H	B	A	H	H	B	A	B	B	H	A	A	B	B	A	H	B	H
2_31836	2	8.656	H	H	B	H	B	B	H	H	H	H	A	A	H	H	A	B	H	H	B	H	A	A	B	H	B	A	H	B	B	H	B	A	H	H	B	A	B	B	H	A	A	B	B	A	H	B	H
2_32492	2	8.656	H	H	B	H	B	B	H	H	H	H	A	A	H	H	A	B	H	H	B	H	A	A	B	H	B	A	H	B	B	H	B	A	H	H	B	A	B	B	H	A	A	B	B	A	H	B	H
2_32674	2	8.656	H	H	B	H	B	B	H	H	H	H	A	A	H	H	A	B	H	H	B	H	A	A	B	H	B	A	H	B	B	H	B	A	H	H	B	A	B	B	H	A	A	B	B	A	H	B	H
2_39556	2	8.656	H	H	B	H	B	B	H	H	H	H	A	A	H	H	A	B	H	H	B	H	A	A	B	H	B	A	H	B	B	H	B	A	H	H	B	A	B	B	H	A	A	B	B	A	H	B	H
2_39992	2	8.656	H	H	B	H	B	B	H	H	H	H	A	A	H	H	A	B	H	H	B	H	A	A	B	H	B	A	H	B	B	H	B	A	H	H	B	A	B	B	H	A	A	B	B	A	H	B	H
2_40160	2	8.656	H	H	B	H	B	B	H	H	H	H	A	A	H	H	A	B	H	H	B	H	A	A	B	H	B	A	H	B	B	H	B	A	H	H	B	A	B	B	H	A	A	B	B	A	H	B	H
2_40911	2	8.656	H	H	B	H	B	B	H	H	H	H	A	A	H	H	A	B	H	H	B	H	A	A	B	H	B	A	H	B	B	H	B	A	H	H	B	A	B	B	H	A	A	B	B	A	H	B	H
2_41331	2	8.656	H	H	B	H	B	B	H	H	H	H	A	A	H	H	A	B	H	H	B	H	A	A	B	H	B	A	H	B	B	H	B	A	H	H	B	A	B	B	H	A	A	B	B	A	H	B	H
2_41683	2	8.656	H	H	B	H	B	B	H	H	H	H	A	A	H	H	A	B	H	H	B	H	A	A	B	H	B	A	H	B	B	H	B	A	H	H	B	A	B	B	H	A	A	B	B	A	H	B	H
2_41776	2	8.656	H	H	B	H	B	B	H	H	H	H	A	A	H	H	A	B	H	H	B	H	A	A	B	H	B	A	H	B	B	H	B	A	H	H	B	A	B	B	H	A	A	B	B	A	H	B	H
2_41906	2	8.656	H	H	B	H	B	B	H	H	H	H	A	A	H	H	A	B	H	H	B	H	A	A	B	H	B	A	H	B	B	H	B	A	H	H	B	A	B	B	H	A	A	B	B	A	H	B	H
2_42229	2	8.656	H	H	B	H	B	B	H	H	H	H	A	A	H	H	A	B	H	H	B	H	A	A	B	H	B	A	H	B	B	H	B	A	H	H	B	A	B	B	H	A	A	B	B	A	H	B	H
2_43165	2	8.656	H	H	B	-	B	B	H	H	H	H	A	A	-	H	A	B	H	H	B	-	A	A	B	H	B	A	H	B	B	H	B	A	H	H	B	A	B	B	H	A	A	B	B	A	H	B	H
2_43360	2	8.656	H	H	B	H	B	B	H	H	H	H	A	A	H	H	A	B	H	H	B	H	A	A	B	H	B	A	H	B	B	H	B	A	H	H	B	A	B	B	H	A	A	B	B	A	H	B	H
2_44337	2	8.656	H	H	B	H	B	B	H	H	H	H	A	A	H	H	A	B	H	H	B	H	A	A	B	H	B	A	H	B	B	H	B	A	H	H	B	A	B	B	H	A	A	B	B	A	H	B	H
2_44728	2	8.656	H	H	B	H	B	B	H	H	H	H	A	A	H	H	A	B	H	H	B	H	A	A	B	H	B	A	H	B	B	H	B	A	H	H	B	A	B	B	H	A	A	B	B	A	H	B	H
2_44769	2	8.656	H	H	B	H	B	B	H	H	H	H	A	A	H	H	A	B	H	H	B	H	A	A	B	H	B	A	H	B	B	H	B	A	H	H	B	A	B	B	H	A	A	B	B	A	H	B	H
2_46016	2	8.656	H	H	B	H	B	B	H	H	H	H	A	A	H	H	A	B	H	H	B	H	A	A	B	H	B	A	H	B	B	H	B	A	H	H	B	A	B	B	H	A	A	B	B	A	H	B	H
2_46018	2	8.656	H	-	B	H	B	B	H	H	H	H	A	A	H	H	A	B	H	H	B	H	A	A	B	H	B	A	H	B	B	H	B	A	H	H	B	A	B	B	H	A	A	B	B	A	H	B	H
2_46158	2	8.656	H	H	B	H	B	B	H	H	H	H	A	A	H	H	A	B	H	H	B	H	A	A	B	H	B	A	H	B	B	H	B	A	H	H	B	A	B	B	H	A	A	B	B	A	H	B	H
2_46235	2	8.656	H	-	-	H	B	B	H	H	-	H	A	A	H	H	A	B	H	H	B	H	A	A	B	H	B	A	H	B	B	H	B	A	H	H	B	A	B	B	H	A	A	B	B	A	H	B	H
2_46593	2	8.656	H	H	B	H	B	B	H	H	H	H	A	A	H	H	A	B	H	H	B	H	A	A	B	H	B	A	H	B	B	H	B	A	H	H	B	A	B	B	H	A	A	B	B	A	H	B	H
2_47075	2	8.656	H	H	B	H	B	B	H	H	H	H	A	A	H	H	A	B	H	H	B	H	A	A	B	H	B	A	H	B	B	H	B	A	H	H	B	A	B	B	H	A	A	B	B	A	H	B	H
2_47343	2	8.656	H	H	B	H	B	B	H	H	H	H	A	A	H	H	A	B	H	H	B	H	A	A	B	H	B	A	H	B	B	H	B	A	H	H	B	A	B	B	H	A	A	B	B	A	H	B	H
2_48851	2	8.656	H	H	B	H	B	B	H	H	H	H	A	A	H	H	A	B	H	H	B	H	A	A	B	H	B	A	H	B	B	H	B	A	H	H	B	A	B	B	H	A	A	B	B	A	H	B	H
2_49593	2	8.656	H	H	B	H	B	B	H	H	H	H	A	A	H	H	A	B	H	H	B	H	A	A	B	H	B	A	H	B	B	H	B	A	H	H	B	A	B	B	H	A	A	B	B	A	H	B	H
2_49746	2	8.656	H	H	B	H	B	B	H	H	H	H	A	A	H	H	A	B	H	H	B	H	A	A	B	H	B	A	H	B	B	H	B	A	H	H	B	A	B	B	H	A	A	B	B	A	H	B	H
2_49856	2	8.656	H	H	B	H	B	B	H	H	H	H	A	A	H	H	A	B	H	H	B	H	A	A	B	H	B	A	H	B	B	H	B	A	H	H	B	A	B	B	H	A	A	B	B	A	H	B	H
2_50526	2	8.656	H	H	B	H	B	B	H	H	H	H	A	A	H	H	A	B	H	H	B	H	A	A	B	H	B	A	H	B	B	H	B	A	H	H	B	A	B	B	H	A	A	B	B	A	H	B	H
2_52194	2	8.656	H	H	B	H	B	B	H	H	H	H	A	A	H	H	A	B	H	H	B	H	A	A	B	H	B	A	H	B	B	H	B	A	H	H	B	A	B	B	H	A	A	B	B	A	H	B	H
2_52299	2	8.656	H	H	B	H	B	B	H	H	H	H	A	A	H	H	A	B	H	H	B	H	A	A	B	H	B	A	H	B	B	H	B	A	H	H	B	A	B	B	H	A	A	B	B	A	H	B	H
2_53641	2	8.656	H	H	B	H	B	B	H	H	H	H	A	A	H	H	A	B	H	H	B	H	A	A	B	H	B	A	H	B	B	H	B	A	H	H	B	A	B	B	H	A	A	B	B	A	H	B	H
2_54949	2	8.656	H	H	B	H	B	B	H	H	H	H	A	A	H	H	A	B	H	H	B	H	A	A	B	H	B	A	H	B	B	H	B	A	H	H	B	A	B	B	H	A	A	B	B	A	H	B	H
2_24487	2	9.076	H	-	-	-	H	B	H	-	-	H	A	A	H	H	A	B	H	H	B	H	A	A	B	H	B	A	H	B	B	H	B	A	H	H	B	A	B	B	H	A	A	B	B	A	H	B	H
2_05426	2	10	H	-	B	-	B	B	H	H	-	H	A	A	H	H	A	B	H	H	B	H	A	A	B	H	B	A	H	B	B	H	B	A	H	H	B	A	B	B	H	A	A	B	B	A	H	B	H
2_18602	2	10	H	H	B	H	B	B	H	H	H	H	A	A	H	H	A	B	H	H	B	H	A	A	B	H	B	A	H	B	B	H	B	A	H	H	B	A	B	B	H	A	A	B	B	A	H	B	H
2_26745	2	10	H	H	B	H	B	B	H	H	H	H	A	A	H	H	A	B	H	H	B	H	A	A	B	H	B	A	H	B	B	H	B	A	H	H	B	A	B	B	H	A	A	B	B	A	H	B	H
2_27204	2	10	H	H	B	H	B	B	H	H	H	H	A	A	H	H	A	B	H	H	B	H	A	A	B	H	B	A	H	B	B	H	B	A	H	H	B	A	B	B	H	A	A	B	B	A	H	B	H
2_38742	2	10	H	H	B	H	B	B	H	H	H	H	A	A	H	H	A	B	H	H	B	H	A	A	B	H	B	A	H	B	B	H	B	A	H	H	B	A	B	B	H	A	A	B	B	A	H	B	H
2_38967	2	10	H	H	B	H	B	B	H	H	H	H	A	A	H	H	A	B	H	H	B	H	A	A	B	H	B	A	H	B	B	H	B	A	H	H	B	A	B	B	H	A	A	B	B	A	H	B	H
2_40131	2	10	H	H	B	H	B	B	H	H	H	H	A	A	H	H	A	B	H	H	B	H	A	A	B	H	B	A	H	B	B	H	B	A	H	H	B	A	B	B	H	A	A	B	B	A	H	B	H
2_41104	2	10	H	H	B	H	B	B	H	H	H	H	A	A	H	H	A	B	H	H	B	H	A	A	B	H	B	A	H	B	B	H	B	A	H	H	B	A	B	B	H	A	A	B	B	A	H	B	H
2_41326	2	10	H	H	B	H	B	B	H	H	H	H	A	A	H	H	A	B	H	H	B	H	A	A	B	H	B	A	H	B	B	H	B	A	H	H	B	A	B	B	H	A	A	B	B	A	H	B	H
2_41568	2	10	H	H	B	H	B	B	H	H	H	H	A	A	H	H	A	B	H	H	B	H	A	A	B	H	B	A	H	B	B	H	B	A	H	H	B	A	B	B	H	A	A	B	B	A	H	B	H
2_41585	2	10	H	H	B	H	B	B	H	H	H	H	A	A	H	H	A	B	H	H	B	H	A	A	B	H	B	A	H	B	B	H	B	A	H	H	B	A	B	B	H	A	A	B	B	A	H	B	H
2_45381	2	10	H	H	B	H	B	B	H	H	H	H	A	A	H	H	A	B	H	H	B	H	A	A	B	H	B	A	H	B	B	H	B	A	H	H	B	A	B	B	H	A	A	B	B	A	H	B	H
2_46668	2	10	H	H	B	H	B	B	H	H	H	H	A	A	H	H	A	B	H	H	B	H	A	A	B	H	B	A	H	B	B	H	B	A	H	H	B	A	B	B	H	A	A	B	B	A	H	B	H
2_47232	2	10	H	H	B	H	B	B	H	H	H	H	A	A	H	H	A	B	H	H	B	H	A	A	B	H	B	A	H	B	B	H	B	A	H	H	B	A	B	B	H	A	A	B	B	A	H	B	H
2_47248	2	10	H	H	B	H	B	B	H	H	H	H	A	A	H	H	A	B	H	H	B	H	A	A	B	H	B	A	H	B	B	H	B	A	H	H	B	A	B	B	H	A	A	B	B	A	H	B	H
2_48444	2	10	H	H	B	H	B	B	H	H	H	H	A	A	H	H	A	B	H	H	B	H	A	A	B	H	B	A	H	B	B	H	B	A	H	H	B	A	B	B	H	A	A	B	B	A	H	B	H
2_49337	2	10	H	H	B	H	B	B	H	H	H	H	A	A	H	H	A	B	H	H	B	H	A	A	B	H	B	A	H	B	B	H	B	A	H	H	B	A	B	B	H	A	A	B	B	A	H	B	H
2_50740	2	10	H	H	B	H	B	B	H	H	H	H	A	A	H	H	A	B	H	H	B	H	A	A	B	H	B	A	H	B	B	H	B	A	H	H	B	A	B	B	H	A	A	B	B	A	H	B	H
2_53660	2	10	H	H	B	H	B	B	H	H	H	H	A	A	H	H	A	B	H	H	B	H	A	A	B	H	B	A	H	B	B	H	B	A	H	H	B	A	B	B	H	A	A	B	B	A	H	B	H
2_24601	2	10.421	H	H	B	H	B	B	H	H	H	H	A	A	H	H	A	B	H	H	B	H	A	A	B	H	B	A	H	B	B	H	B	A	H	H	B	A	B	B	H	A	A	B	B	A	H	B	H
2_24602	2	10.421	H	H	B	H	B	B	H	H	H	H	A	A	H	H	A	B	H	H	B	H	A	A	B	H	B	A	H	B	B	H	B	A	H	H	B	A	B	B	H	A	A	B	B	A	H	B	H
2_39766	2	10.421	-	-	B	-	B	B	H	H	-	H	A	A	H	H	A	B	H	H	B	H	A	A	B	H	B	A	H	B	B	H	B	A	H	H	B	A	B	B	H	A	A	B	B	A	H	B	H
2_47063	2	10.421	H	H	B	H	B	B	H	H	H	H	A	A	H	H	A	B	H	H	B	H	A	A	B	H	B	A	H	B	B	H	B	A	H	H	B	A	B	B	H	A	A	B	B	A	H	B	H
2_47231	2	10.421	H	H	B	H	B	B	H	H	H	H	A	A	H	H	A	B	H	H	B	H	A	A	B	H	B	A	H	B	B	H	B	A	H	H	B	A	B	B	H	A	A	B	B	A	H	B	H
2_38275	2	10.841	H	H	B	H	B	B	H	H	H	H	A	A	H	H	A	B	H	H	B	H	A	A	B	H	B	A	H	B	B	H	B	A	H	H	B	A	B	B	H	A	A	B	B	A	H	B	H
2_51848	2	11.765	-	-	B	-	B	B	H	H	-	H	A	A	H	H	A	B	H	H	B	H	A	A	B	H	B	A	H	B	-	H	B	A	H	H	B	H	B	B	H	A	A	B	B	A	H	B	H
2_00595	2	12.269	H	H	B	H	B	B	H	H	H	H	A	A	H	H	A	B	H	H	B	H	A	A	B	H	B	A	H	B	H	H	B	A	H	H	B	H	B	B	H	A	A	B	B	A	H	B	H
2_00596	2	12.269	H	H	B	H	B	B	H	H	H	H	A	A	H	H	A	B	H	H	B	H	A	A	B	H	B	A	H	B	H	H	B	A	H	H	B	H	B	B	H	A	A	B	B	A	H	B	H
2_01620	2	12.269	H	H	B	H	B	B	H	H	H	H	A	A	H	H	A	B	H	H	B	H	A	A	B	H	B	A	H	B	H	H	B	A	H	H	B	H	B	B	H	A	A	B	B	A	H	B	H
2_02704	2	12.269	H	H	B	H	B	B	H	H	H	H	A	A	H	H	A	B	H	H	B	H	A	A	B	H	B	A	H	B	H	H	B	A	H	H	B	H	B	B	H	A	A	B	B	A	H	B	H
2_02705	2	12.269	H	H	B	H	B	B	H	H	H	H	A	A	H	H	A	B	H	H	B	H	A	A	B	H	B	A	H	B	H	H	B	A	H	H	B	H	B	B	H	A	A	B	B	A	H	B	H
2_05529	2	12.269	H	H	B	H	B	B	H	H	H	H	A	A	H	H	A	B	H	H	B	H	A	A	B	H	B	A	H	B	H	H	B	A	H	H	B	H	B	B	H	A	A	B	B	A	H	B	H
2_05530	2	12.269	H	H	B	H	B	B	H	H	H	H	A	A	H	H	A	B	H	H	B	H	A	A	B	H	B	A	H	B	H	H	B	A	H	-	B	H	B	B	H	A	A	B	B	A	-	B	H
2_06803	2	12.269	H	H	B	H	B	B	H	H	H	H	A	A	H	H	A	B	H	H	B	H	A	A	B	H	B	A	H	B	H	H	B	A	H	H	B	H	B	B	H	A	A	B	B	A	H	B	H
2_11009	2	12.269	H	H	B	H	B	B	H	H	H	H	A	A	H	H	A	B	H	H	B	H	A	A	B	H	B	A	H	B	H	H	B	A	H	H	B	H	B	B	H	A	A	B	B	A	H	B	H
2_13608	2	12.269	H	H	B	H	B	B	H	H	H	H	A	A	H	H	A	B	H	H	B	H	A	A	B	H	B	A	H	B	H	H	B	A	H	H	B	H	B	B	H	A	A	B	B	A	H	B	H
2_16263	2	12.269	H	H	B	H	B	B	H	H	H	H	A	A	H	H	A	B	H	H	B	H	A	A	B	H	B	A	H	B	H	H	B	A	H	H	B	H	B	B	H	A	A	B	B	A	H	B	H
2_17960	2	12.269	H	H	B	H	B	B	H	H	H	H	A	A	H	H	A	B	H	H	B	H	A	A	B	H	B	A	H	B	H	H	B	A	H	H	B	H	B	B	H	A	A	B	B	A	H	B	H
2_22212	2	12.269	H	H	B	H	B	-	H	H	-	H	A	A	H	H	A	B	H	H	B	H	A	A	B	H	B	A	H	B	H	H	B	A	H	H	B	H	B	B	H	A	A	B	B	A	H	B	H
2_22213	2	12.269	H	H	B	H	B	B	H	H	H	H	A	A	H	H	A	B	H	H	B	H	A	A	B	H	B	A	H	B	H	H	B	A	H	H	B	H	B	B	H	A	A	B	B	A	H	B	H
2_24685	2	12.269	H	H	B	H	B	B	H	H	H	H	A	A	H	H	A	B	H	H	B	H	A	A	B	H	B	A	H	B	H	H	B	A	H	H	B	H	B	B	H	A	A	B	B	A	H	B	H
2_24686	2	12.269	H	H	B	H	B	B	H	H	H	H	A	A	H	H	A	B	H	H	B	H	A	A	B	H	B	A	H	B	H	H	B	A	H	H	B	H	B	B	H	A	A	B	B	A	H	B	H
2_28085	2	12.269	H	H	B	H	B	B	H	H	H	H	A	A	H	H	A	B	H	H	B	H	A	A	B	H	B	A	H	B	H	H	B	A	H	H	B	H	B	B	H	A	A	B	B	A	H	B	H
2_28701	2	12.269	H	H	B	H	B	B	H	H	H	H	A	A	H	H	A	B	H	H	B	H	A	A	B	H	B	A	H	B	H	H	B	A	H	H	B	H	B	B	H	A	A	B	B	A	H	B	H
2_31481	2	12.269	H	H	B	H	B	B	H	H	H	H	A	A	H	H	A	B	H	H	B	H	A	A	B	H	B	A	H	B	H	H	B	A	H	H	B	H	B	B	H	A	A	B	B	A	H	B	H
2_38159	2	12.269	H	H	B	H	B	B	H	H	H	H	A	A	H	H	A	B	H	H	B	H	A	A	B	H	B	A	H	B	H	H	B	A	H	H	B	H	B	B	H	A	A	B	B	A	H	B	H
2_38160	2	12.269	H	H	B	H	B	B	H	H	H	H	A	A	H	H	A	B	H	H	B	H	A	A	B	H	B	A	H	B	H	H	B	A	H	H	B	H	B	B	H	A	A	B	B	A	H	B	H
2_38419	2	12.269	H	H	B	H	B	B	H	H	H	H	A	A	H	H	A	B	H	H	B	H	A	A	B	H	B	A	H	B	H	H	B	A	H	H	B	H	B	B	H	A	A	B	B	A	H	B	H
2_39771	2	12.269	H	H	B	H	B	B	H	H	H	H	A	A	H	H	A	B	H	H	B	H	A	A	B	H	B	A	H	B	H	H	B	A	H	H	B	H	B	B	H	A	A	B	B	A	H	B	H
2_40031	2	12.269	H	H	-	H	-	B	H	H	H	H	A	A	H	H	A	B	H	H	B	H	A	A	B	H	B	A	H	B	H	H	B	A	H	H	B	H	B	-	H	A	A	-	B	A	H	B	H
2_40603	2	12.269	H	H	B	H	B	B	H	H	H	H	A	A	H	H	A	B	H	H	B	H	A	A	B	H	B	A	H	B	H	H	B	A	H	H	B	H	B	B	H	A	A	B	B	A	H	B	H
2_41022	2	12.269	H	H	B	H	B	B	H	H	H	H	A	A	H	H	A	B	H	H	B	H	A	A	B	H	B	A	H	B	H	H	B	A	H	H	B	H	B	B	H	A	A	B	B	A	H	B	H
2_41535	2	12.269	H	H	B	H	B	B	H	H	H	H	A	A	H	H	A	B	H	H	B	H	A	A	B	H	B	A	H	B	H	H	B	A	H	H	B	H	B	B	H	A	A	B	B	A	H	B	H
2_42230	2	12.269	-	-	B	-	B	B	H	-	-	-	A	A	H	H	A	B	H	H	B	H	A	A	B	H	B	A	H	B	-	H	B	A	H	H	B	-	B	B	H	A	A	B	B	A	H	B	H
2_42347	2	12.269	H	H	B	H	B	B	H	H	H	H	A	A	H	H	A	B	H	H	B	H	A	A	B	H	B	A	H	B	H	H	B	A	H	H	B	H	B	B	H	A	A	B	B	A	H	B	H
2_42745	2	12.269	H	H	B	H	B	B	H	H	H	H	A	A	H	H	A	B	H	H	B	H	A	A	B	H	B	A	H	B	H	H	B	A	H	H	B	H	B	B	H	A	A	B	B	A	H	B	H
2_43496	2	12.269	H	H	B	H	B	B	H	H	H	H	A	A	H	H	A	B	H	H	B	H	A	A	B	H	B	A	H	B	H	H	B	A	H	H	B	H	B	B	H	A	A	B	B	A	H	B	H
2_43895	2	12.269	H	H	B	H	B	B	H	H	H	H	A	A	H	H	A	B	H	H	B	H	A	A	B	H	B	A	H	B	H	H	B	A	H	H	B	H	B	B	H	A	A	B	B	A	H	B	H
2_44123	2	12.269	H	H	B	H	B	B	H	H	H	H	A	A	H	H	A	B	H	H	B	H	A	A	B	H	B	A	H	B	H	H	B	A	H	H	B	H	B	B	H	A	A	B	B	A	H	B	H
2_44291	2	12.269	H	H	B	H	B	B	H	H	H	H	A	A	H	H	A	B	H	H	B	H	A	A	B	H	B	A	H	B	H	H	B	A	H	H	B	H	B	B	H	A	A	B	B	A	H	B	H
2_44581	2	12.269	H	H	B	H	B	B	H	H	H	H	A	A	H	H	A	B	H	H	B	H	A	A	B	H	B	A	H	B	H	H	B	A	H	H	B	H	B	B	H	A	A	B	B	A	H	B	H
2_44776	2	12.269	H	H	B	H	B	B	H	H	H	H	A	A	H	H	A	B	H	H	B	H	A	A	B	H	B	A	H	B	H	H	B	A	H	H	B	H	B	B	H	A	A	B	B	A	H	B	H
2_46305	2	12.269	H	H	B	-	B	B	H	H	-	H	A	A	H	H	A	B	H	H	B	H	A	A	B	H	B	A	H	B	H	H	B	A	H	H	B	H	B	B	H	A	A	B	B	A	H	B	H
2_47948	2	12.269	H	H	B	H	B	B	H	H	H	H	A	A	H	H	A	B	H	H	B	H	A	A	B	H	B	A	H	B	H	H	B	A	H	H	B	H	B	B	H	A	A	B	B	A	H	B	H
2_48412	2	12.269	H	H	B	H	B	B	H	H	H	H	A	A	H	H	A	B	H	H	B	H	A	A	B	H	B	A	H	B	H	H	B	A	H	H	B	H	B	B	H	A	A	B	B	A	H	B	H
2_48690	2	12.269	H	H	B	H	B	B	H	H	H	H	A	A	H	H	A	B	H	H	B	H	A	A	B	H	B	A	H	B	H	H	B	A	H	H	B	H	B	B	H	A	A	B	B	A	H	B	H
2_48819	2	12.269	H	H	B	H	B	B	H	H	H	H	A	A	H	H	A	B	H	H	B	H	A	A	B	H	B	A	H	B	H	H	B	A	H	H	B	H	B	B	H	A	A	B	B	A	H	B	H
2_50045	2	12.269	H	H	B	H	B	B	H	H	H	H	A	A	H	H	A	B	H	H	B	H	A	A	B	H	B	A	H	B	H	H	B	A	H	H	B	H	B	B	H	A	A	B	B	A	H	B	H
2_50317	2	12.269	H	H	B	H	B	B	H	H	H	H	A	A	H	H	A	B	H	H	B	H	A	A	B	H	B	A	H	B	H	H	B	A	H	H	B	H	B	B	H	A	A	B	B	A	H	B	H
2_51053	2	12.269	H	H	B	H	B	B	H	H	H	H	A	A	H	H	A	B	H	H	B	H	A	A	B	H	B	A	H	B	H	H	B	A	H	H	B	H	B	B	H	A	A	B	B	A	H	B	H
2_51433	2	12.269	H	H	B	H	B	B	H	H	H	H	A	A	H	H	A	B	H	H	B	H	A	A	B	H	B	A	H	B	H	H	B	A	H	H	B	H	B	B	H	A	A	B	B	A	H	B	H
2_51580	2	12.269	H	H	B	H	B	B	H	H	H	-	A	A	H	H	A	B	H	H	B	H	A	A	-	H	B	A	H	B	-	H	B	A	H	H	B	-	B	-	H	A	A	B	B	A	H	B	H
2_51644	2	12.269	H	H	B	H	B	B	H	H	H	H	A	A	H	H	A	B	H	H	B	H	A	A	B	H	B	A	H	B	H	H	B	A	H	H	B	H	B	B	H	A	A	B	B	A	H	B	H
2_51927	2	12.269	H	H	B	H	B	B	H	H	H	H	A	A	H	H	A	B	H	H	B	H	A	A	B	H	B	A	H	B	H	H	B	A	H	H	B	H	B	B	H	A	A	B	B	A	H	B	H
2_52382	2	12.269	H	H	B	H	B	B	H	H	H	H	A	A	H	H	A	B	H	H	B	H	A	A	B	H	B	A	H	B	H	H	B	A	H	H	B	H	B	B	H	A	A	B	B	A	H	B	H
2_52985	2	12.269	H	H	B	H	B	B	H	H	H	H	A	A	H	H	A	B	H	H	B	H	A	A	B	H	B	A	H	B	H	H	B	A	H	H	B	H	B	B	H	A	A	B	B	A	H	B	H
2_53532	2	12.269	H	H	B	H	B	B	H	H	H	H	A	A	H	H	A	B	H	H	B	H	A	A	B	H	B	A	H	B	H	H	B	A	H	H	B	H	B	B	H	A	A	B	B	A	H	B	H
2_53806	2	12.269	H	H	B	H	B	-	H	H	H	H	A	A	H	H	A	B	H	H	B	H	A	A	-	H	B	A	H	B	H	H	B	A	H	H	B	H	B	-	H	A	A	B	B	A	H	B	H
2_53870	2	12.269	H	H	B	H	B	-	H	H	H	H	A	A	H	H	A	B	H	H	B	H	A	A	-	H	B	A	H	B	H	H	B	A	H	H	B	H	B	-	H	A	A	B	B	A	H	B	H
2_53964	2	12.269	H	H	B	H	B	B	H	H	H	H	A	A	H	H	A	B	H	H	B	H	A	A	B	H	B	A	H	B	H	H	B	A	H	H	B	H	B	B	H	A	A	B	B	A	H	B	H
2_54071	2	12.269	H	H	B	H	B	B	H	H	H	H	A	A	H	H	A	B	H	H	B	H	A	A	B	H	B	A	H	B	H	H	B	A	H	H	B	H	B	B	H	A	A	B	B	A	H	B	H
2_55262	2	12.269	H	H	B	H	B	B	H	H	H	H	A	A	H	H	A	B	H	H	B	H	A	A	B	H	B	A	H	B	H	H	B	A	H	H	B	H	B	B	H	A	A	B	B	A	H	B	H
2_55399	2	12.269	H	H	B	H	B	B	H	H	H	H	A	A	H	H	A	B	H	H	B	H	A	A	B	H	B	A	H	B	H	H	B	A	H	H	B	H	B	B	H	A	A	B	B	A	H	B	H
2_00390	2	12.69	H	H	B	H	B	B	H	H	H	H	A	A	H	H	A	B	H	H	B	H	A	A	B	H	B	A	H	B	H	H	B	A	H	H	H	H	B	B	H	A	A	B	B	A	H	B	H
2_00391	2	12.69	H	H	B	H	B	B	H	H	H	H	A	A	H	H	A	B	H	H	B	H	A	A	B	H	B	A	H	B	H	H	B	A	H	H	H	H	B	B	H	A	A	B	B	A	H	B	H
2_00981	2	12.69	H	H	B	H	B	B	H	H	H	H	A	A	H	H	A	B	H	H	B	H	A	A	B	H	B	A	H	B	H	H	B	A	H	H	H	H	B	B	H	A	A	B	B	A	H	B	H
2_02299	2	12.69	H	H	B	H	B	B	H	H	H	H	A	A	H	H	A	B	H	H	B	H	A	A	B	H	B	A	H	B	H	H	B	A	H	H	H	H	B	B	H	A	A	B	B	A	H	B	H
2_04355	2	12.69	H	H	B	H	B	B	H	H	H	H	A	A	H	H	A	B	H	H	B	H	A	A	B	H	B	A	H	B	H	H	B	A	H	H	H	H	B	B	H	A	A	B	B	A	H	B	H
2_04356	2	12.69	H	H	B	H	B	B	H	H	H	H	A	A	H	H	A	B	H	H	B	H	A	A	B	H	B	A	H	B	H	H	B	A	H	H	H	H	B	B	H	A	A	B	B	A	H	B	H
2_07269	2	12.69	H	H	B	H	B	B	H	H	H	H	A	A	H	H	A	B	H	H	B	H	A	A	B	H	B	A	H	B	H	H	B	A	H	H	H	H	B	B	H	A	A	B	B	A	H	B	H
2_08179	2	12.69	H	H	B	H	B	B	H	H	H	H	A	A	H	H	A	B	H	H	B	H	A	A	B	H	B	A	H	B	H	H	B	A	H	H	H	H	B	B	H	A	A	B	B	A	H	B	H
2_08180	2	12.69	H	H	B	H	B	B	H	H	H	H	A	A	H	H	A	B	H	H	B	H	A	A	B	H	B	A	H	B	H	H	B	A	H	H	H	H	B	B	H	A	A	B	B	A	H	B	H
2_09559	2	12.69	H	H	B	H	B	B	H	H	H	H	A	A	H	H	A	B	H	H	B	H	A	A	B	H	B	A	H	B	H	H	B	A	H	H	H	H	B	B	H	A	A	B	B	A	H	B	H
2_09560	2	12.69	H	H	B	H	B	B	H	H	H	H	A	A	H	H	A	B	H	H	B	H	A	A	B	H	B	A	H	B	H	H	B	A	H	H	H	H	B	B	H	A	A	B	B	A	H	B	H
2_09561	2	12.69	H	H	B	H	B	B	H	H	H	H	A	A	H	H	A	B	H	H	B	H	A	A	B	H	B	A	H	B	H	H	B	A	H	H	H	H	B	B	H	A	A	B	B	A	H	B	H
2_15424	2	12.69	H	H	B	H	B	B	H	H	H	H	A	A	H	H	A	B	H	H	B	H	A	A	B	H	B	A	H	B	H	H	B	A	H	H	H	H	B	B	H	A	A	B	B	A	H	B	H
2_18939	2	12.69	H	H	B	H	B	B	H	H	H	H	A	A	H	H	A	B	H	H	B	H	A	A	B	H	B	A	H	B	H	H	B	A	H	H	H	H	B	B	H	A	A	B	B	A	H	B	H
2_22082	2	12.69	H	H	B	H	B	B	H	H	H	H	A	A	H	H	A	B	H	H	B	H	A	A	B	H	B	A	H	B	H	H	B	A	H	H	H	H	B	B	H	A	A	B	B	A	H	B	H
2_24597	2	12.69	H	H	B	H	B	B	H	H	H	H	A	A	H	H	A	B	H	H	B	H	A	A	B	H	B	A	H	B	H	H	B	A	H	H	H	H	B	B	H	A	A	B	B	A	H	B	H
2_24598	2	12.69	H	H	B	H	B	B	H	H	H	H	A	A	H	H	A	B	H	H	B	H	A	A	B	H	B	A	H	B	H	H	B	A	H	H	H	H	B	B	H	A	A	B	B	A	H	B	H
2_27945	2	12.69	H	H	B	H	B	B	H	H	H	H	A	A	H	H	A	B	H	H	B	H	A	A	B	H	B	A	H	B	H	H	B	A	H	H	H	H	B	B	H	A	A	B	B	A	H	B	H
2_31613	2	12.69	H	H	B	H	B	B	H	H	H	H	A	A	H	H	A	B	H	H	B	H	A	A	B	H	B	A	H	B	H	H	B	A	H	H	H	H	B	B	H	A	A	B	B	A	H	B	H
2_32713	2	12.69	H	H	B	H	B	B	H	H	H	H	A	A	H	H	A	B	H	H	B	H	A	A	B	H	B	A	H	B	H	H	B	A	H	H	H	H	B	B	H	A	A	B	B	A	H	B	H
2_38988	2	12.69	H	H	B	H	B	B	H	H	H	H	A	A	H	H	A	B	H	H	B	H	A	A	B	H	B	A	H	B	H	H	B	A	H	H	H	H	B	B	H	A	A	B	B	A	H	B	H
2_40218	2	12.69	H	H	B	H	B	B	H	H	H	H	A	A	H	H	A	B	H	H	B	H	A	A	B	H	B	A	H	B	H	H	B	A	H	H	H	H	B	B	H	A	A	B	B	A	H	B	H
2_41937	2	12.69	H	H	B	H	B	B	H	H	H	H	A	A	H	H	A	B	H	H	B	H	A	A	B	H	B	A	H	B	H	H	B	A	H	H	H	H	B	B	H	A	A	B	B	A	H	B	H
2_43526	2	12.69	H	H	B	H	B	B	H	H	H	H	A	A	H	H	A	B	H	H	B	H	A	A	B	H	B	A	H	B	H	H	B	A	H	H	H	H	B	B	H	A	A	B	B	A	H	B	H
2_43802	2	12.69	H	H	B	-	B	B	H	H	-	H	A	A	H	H	A	B	H	H	B	H	A	A	B	H	B	A	H	B	H	H	B	A	H	H	H	H	B	B	H	A	A	B	B	A	H	B	H
2_44080	2	12.69	H	H	B	H	B	B	H	H	H	H	A	A	H	H	A	B	H	H	B	H	A	A	B	H	B	A	H	B	H	H	B	A	H	H	H	H	B	B	H	A	A	B	B	A	H	B	H
2_44827	2	12.69	H	H	B	H	B	B	H	H	H	-	A	A	H	H	A	B	H	H	B	H	A	A	B	H	B	A	H	B	H	H	B	A	H	H	H	H	B	B	H	A	A	B	B	A	H	B	H
2_45433	2	12.69	H	H	B	H	B	B	H	H	H	H	A	A	H	H	A	B	H	H	B	H	A	A	B	H	B	A	H	B	H	H	B	A	H	H	H	H	B	B	H	A	A	B	B	A	H	B	H
2_45445	2	12.69	H	H	B	H	B	B	H	H	H	H	A	A	H	H	A	B	H	H	B	H	A	A	B	H	B	A	H	B	H	H	B	A	H	H	H	H	B	B	H	A	A	B	B	A	H	B	H
2_47046	2	12.69	H	H	B	H	B	B	H	H	H	H	A	A	H	H	A	B	H	H	B	H	A	A	B	H	B	A	H	B	H	H	B	A	H	H	H	H	B	B	H	A	A	B	B	A	H	B	H
2_47328	2	12.69	H	H	B	H	B	B	H	H	H	H	A	A	H	H	A	B	H	H	B	H	A	A	B	H	B	A	H	B	H	H	B	A	H	H	H	H	B	B	H	A	A	B	B	A	H	B	H
2_47604	2	12.69	H	H	B	H	B	B	H	H	H	H	A	A	H	H	A	B	H	H	B	H	A	A	B	H	B	A	H	B	H	H	B	A	H	H	H	H	B	B	H	A	A	B	B	A	H	B	H
2_48386	2	12.69	H	H	B	H	B	B	H	H	H	H	A	A	H	H	A	B	H	H	B	H	A	A	B	H	B	A	H	B	H	H	B	A	H	H	H	H	B	B	H	A	A	B	B	A	H	B	H
2_49574	2	12.69	H	H	B	H	B	B	H	H	H	H	A	A	H	H	A	B	H	H	B	H	A	A	B	H	B	A	H	B	H	H	B	A	H	H	H	H	B	B	H	A	A	B	B	A	H	B	H
2_52927	2	12.69	H	H	B	H	B	B	H	H	H	H	A	A	H	H	A	B	H	H	B	H	A	A	B	H	B	A	H	B	H	H	B	A	H	H	H	H	B	B	H	A	A	B	B	A	H	B	H
2_53098	2	12.69	H	H	B	H	B	B	H	H	H	H	A	A	H	H	A	B	H	H	B	H	A	A	B	H	B	A	H	B	H	H	B	A	H	H	H	H	B	B	H	A	A	B	B	A	H	B	H
2_53620	2	12.69	H	H	B	H	B	B	H	H	H	H	A	A	H	H	A	B	H	H	B	H	A	A	B	H	B	A	H	B	H	H	B	A	H	H	H	H	B	B	H	A	A	B	B	A	H	B	H
2_54359	2	12.69	H	H	B	H	B	B	H	H	H	H	A	A	H	H	A	B	H	H	B	H	A	A	B	H	B	A	H	B	H	H	B	A	H	H	H	H	B	B	H	A	A	B	B	A	H	B	H
2_30048	2	13.614	H	H	H	H	B	B	H	H	H	H	A	A	H	H	A	B	H	H	B	H	A	A	B	H	B	A	H	B	H	H	B	A	H	H	H	H	B	B	H	A	A	B	B	A	H	B	H
2_14945	2	14.959	H	H	B	H	B	B	H	H	H	H	A	A	H	H	A	B	H	H	B	H	A	A	B	H	B	A	H	B	H	H	B	A	H	H	H	H	B	B	H	A	A	B	B	A	H	B	H
2_14946	2	14.959	H	H	B	H	B	B	H	H	H	H	A	A	H	H	A	B	H	H	B	H	A	A	B	H	B	A	H	B	H	H	B	A	H	H	H	H	B	B	H	A	A	B	B	A	H	B	H
2_47083	2	14.959	H	H	B	H	B	B	H	H	H	H	A	A	H	H	A	B	H	H	B	H	A	A	B	H	B	A	H	B	H	H	B	A	H	H	H	H	B	B	H	A	A	B	B	A	H	B	H
2_34200	2	15.379	H	H	B	B	B	B	H	H	-	H	A	A	H	H	A	B	H	H	B	H	A	A	B	H	B	A	H	B	H	H	B	A	H	H	H	H	B	B	H	A	A	B	B	A	H	B	H
2_40827	2	16.64	H	H	H	B	B	B	H	H	H	H	A	A	H	H	A	B	H	H	B	H	A	A	B	H	B	A	H	B	H	H	B	A	H	H	H	H	B	B	H	A	H	B	B	A	H	B	H
2_03870	2	17.06	H	H	H	B	B	B	H	H	H	H	A	A	H	H	A	B	H	H	B	H	A	A	B	H	B	A	H	H	H	H	B	A	H	H	H	H	B	B	H	A	H	B	B	A	H	B	H
2_07676	2	17.06	H	H	H	B	B	B	H	H	H	H	A	A	H	H	A	B	H	H	B	H	A	A	B	H	B	A	H	H	H	H	B	A	H	H	H	H	B	B	H	A	H	B	B	A	H	B	H
2_07677	2	17.06	H	H	H	B	B	B	H	H	H	H	A	A	H	H	A	B	H	H	B	H	A	A	B	H	B	A	H	H	H	H	B	A	H	H	H	H	B	B	H	A	H	B	B	A	H	B	H
2_08755	2	17.06	H	H	H	B	B	B	H	H	H	H	A	A	H	H	A	B	H	H	B	H	A	A	B	H	B	A	H	H	H	H	B	A	H	H	H	H	B	B	H	A	H	B	B	A	H	B	H
2_08756	2	17.06	H	H	H	B	B	B	H	H	H	H	A	A	H	H	A	B	H	H	B	H	A	A	B	H	B	A	H	H	H	H	B	A	H	H	H	H	B	B	H	A	H	B	B	A	H	B	H
2_17297	2	17.06	H	H	H	B	B	B	H	H	H	H	A	A	H	H	A	B	H	H	B	H	A	A	B	H	B	A	H	H	H	H	B	A	H	H	H	H	B	B	H	A	H	B	B	A	H	B	H
2_17298	2	17.06	H	H	H	B	B	B	H	H	H	H	A	A	H	H	A	B	H	H	B	H	A	A	B	H	B	A	H	H	H	H	B	A	H	H	H	H	B	B	H	A	H	B	B	A	H	B	H
2_17636	2	17.06	H	H	H	B	B	B	H	H	H	H	A	A	H	H	A	B	H	H	B	H	A	A	B	H	B	A	H	H	H	H	B	A	H	H	H	H	B	B	H	A	H	B	B	A	H	B	H
2_17637	2	17.06	H	H	H	B	B	B	H	H	H	H	A	A	H	H	A	B	H	H	B	H	A	A	B	H	B	A	H	H	H	H	B	A	H	H	H	H	B	B	H	A	H	B	B	A	H	B	H
2_19019	2	17.06	H	H	H	B	B	B	H	H	H	H	A	A	H	H	A	B	H	H	B	H	A	A	B	H	B	A	H	H	H	H	B	A	H	H	H	H	B	B	H	A	H	B	B	A	H	B	H
2_20105	2	17.06	H	H	H	B	B	B	H	H	H	H	A	A	H	H	A	B	H	H	B	H	A	A	B	H	B	A	H	H	H	H	B	A	H	H	H	H	B	B	H	A	H	B	B	A	H	B	H
2_20106	2	17.06	H	H	H	B	B	B	H	H	H	H	A	A	H	H	A	B	H	H	B	H	A	A	B	H	B	A	H	H	H	H	B	A	H	H	H	H	B	B	H	A	H	B	B	A	H	B	H
2_21282	2	17.06	H	H	H	B	B	B	H	H	H	H	A	A	H	H	A	B	H	H	B	H	A	A	B	H	B	A	H	H	H	H	B	A	H	H	H	H	B	B	H	A	H	B	B	A	H	B	H
2_26112	2	17.06	H	-	-	B	B	B	H	H	-	H	A	A	H	H	A	B	H	H	B	H	A	A	B	H	B	A	H	H	H	H	B	A	H	H	H	H	B	B	H	A	-	B	B	A	H	B	H
2_26113	2	17.06	H	H	H	B	B	B	H	H	H	H	A	A	H	H	A	B	H	H	B	H	A	A	B	H	B	A	H	H	H	H	B	A	H	H	H	H	B	B	H	A	H	B	B	A	H	B	H
2_34509	2	17.06	H	H	H	B	B	B	H	H	H	H	A	A	H	H	A	B	H	H	B	H	A	A	B	H	B	A	H	H	H	H	B	A	H	H	H	H	B	B	H	A	H	B	B	A	H	B	H
2_41614	2	17.06	H	H	H	B	B	B	H	H	H	H	A	A	H	H	A	B	H	H	B	H	A	A	B	H	B	A	H	H	H	H	B	A	H	H	H	H	B	B	H	A	H	B	B	A	H	B	H
2_43031	2	17.06	H	H	H	B	B	B	H	H	H	H	A	A	H	H	A	B	H	H	B	H	A	A	B	H	B	A	H	H	H	H	B	A	H	H	H	H	B	B	H	A	H	B	B	A	H	B	H
2_49153	2	17.06	H	H	H	B	B	B	H	H	H	H	A	A	H	H	A	B	H	H	B	H	A	A	B	H	B	A	H	H	H	H	B	A	H	H	H	H	B	B	H	A	H	B	B	A	H	B	H
2_49539	2	17.06	H	H	H	B	B	B	H	H	H	H	A	A	H	H	A	B	H	H	B	H	A	A	B	H	B	A	H	H	H	H	B	A	H	H	H	H	B	B	H	A	H	B	B	A	H	B	H
2_51759	2	17.06	H	H	H	B	B	B	H	H	H	H	A	A	H	H	A	B	H	H	B	H	A	A	B	H	B	A	H	H	H	H	B	A	H	H	H	H	B	B	H	A	H	B	B	A	H	B	H
2_51913	2	17.06	H	H	H	B	B	B	H	H	H	H	A	A	H	H	A	B	H	H	B	H	A	A	B	H	B	A	H	H	H	H	B	A	H	H	H	H	B	B	H	A	H	B	B	A	H	B	H
2_53728	2	17.06	H	H	H	B	B	B	H	H	H	H	A	A	H	H	A	B	H	H	B	H	A	A	B	H	B	A	H	H	H	H	B	A	H	H	H	H	B	B	H	A	H	B	B	A	H	B	H
2_06071	2	17.48	H	H	H	B	B	B	H	H	H	H	A	A	H	H	A	B	H	H	B	H	A	A	B	H	B	A	H	H	H	H	B	A	H	H	H	H	B	B	H	A	H	B	B	A	H	B	H
2_06445	2	17.48	H	H	H	B	B	B	H	H	H	H	A	A	H	H	A	B	H	H	B	H	A	A	B	H	B	A	H	H	H	H	B	A	H	H	H	H	B	B	H	A	H	B	B	A	H	B	H
2_14559	2	17.48	H	H	H	B	B	B	H	H	H	H	A	A	H	H	A	B	H	H	B	H	A	A	B	H	B	A	H	H	H	H	B	A	H	H	H	H	B	B	H	A	H	B	B	A	H	B	H
2_14867	2	17.48	H	H	H	B	B	B	H	H	H	H	A	A	H	H	A	B	H	H	B	H	A	A	B	H	B	A	H	H	H	H	B	A	H	H	H	H	B	B	H	A	H	B	B	A	H	B	H
2_16544	2	17.48	H	H	H	B	B	B	H	H	H	H	A	A	H	H	A	B	H	H	B	H	A	A	B	H	B	A	H	H	H	H	B	A	H	H	H	H	B	B	H	A	H	B	B	A	H	B	H
2_16545	2	17.48	H	H	H	B	B	B	H	H	H	H	A	A	H	H	A	B	H	H	B	H	A	A	B	H	B	A	H	H	H	H	B	A	H	H	H	H	B	B	H	A	H	B	B	A	H	B	H
2_22009	2	17.48	H	H	H	B	B	B	H	H	H	H	A	A	H	H	A	B	H	H	B	H	A	A	B	H	B	A	H	H	H	H	B	A	H	H	H	H	B	B	H	A	-	B	B	A	H	B	H
2_23484	2	17.48	H	H	H	B	B	B	H	H	H	H	A	A	H	H	A	B	H	H	B	H	A	A	B	H	B	A	H	H	H	H	B	A	H	H	H	H	B	B	H	A	H	B	B	A	H	B	H
2_23485	2	17.48	H	H	H	B	B	B	H	H	H	H	A	A	H	H	A	B	H	H	B	H	A	A	B	H	B	A	H	H	H	H	B	A	H	H	H	H	B	B	H	A	H	B	B	A	H	B	H
2_29681	2	17.48	H	H	H	B	B	B	H	H	H	H	A	A	H	H	A	B	H	H	B	H	A	A	B	H	B	A	H	H	H	H	B	A	H	H	H	H	B	B	H	A	H	B	B	A	H	B	H
2_29885	2	17.48	H	H	H	B	B	B	H	H	H	H	A	A	H	H	A	B	H	H	B	H	A	A	B	H	B	A	H	H	H	H	B	A	H	H	H	H	B	B	H	A	H	B	B	A	H	B	H
2_31605	2	17.48	H	H	H	B	B	B	H	H	H	H	A	A	H	H	A	B	H	H	B	H	A	A	B	H	B	A	H	H	H	H	B	A	H	H	H	H	B	B	H	A	H	B	B	A	H	B	H
2_34672	2	17.48	H	H	H	B	B	B	H	H	H	H	A	A	H	H	A	B	H	H	B	H	A	A	B	H	B	A	H	H	H	H	B	A	H	H	H	H	B	B	H	A	H	B	B	A	H	B	H
2_34673	2	17.48	H	H	H	B	B	B	H	H	H	H	A	A	H	H	A	B	H	H	B	H	A	A	B	H	B	A	H	H	H	H	B	A	H	H	H	H	B	B	H	A	H	B	B	A	H	B	H
2_38703	2	17.48	H	H	H	B	B	B	H	H	H	H	A	A	H	H	A	B	H	H	B	H	A	A	B	H	B	A	H	H	H	H	B	A	H	H	H	H	B	B	H	A	H	B	B	A	H	B	H
2_38704	2	17.48	H	H	H	B	B	B	H	H	H	H	A	A	H	H	A	B	H	H	B	H	A	A	B	H	B	A	H	H	H	H	B	A	H	H	H	H	B	B	H	A	H	B	B	A	H	B	H
2_38961	2	17.48	H	H	H	B	B	B	H	H	H	H	A	A	H	H	A	B	H	H	B	H	A	A	B	H	B	A	H	H	H	H	B	A	H	H	H	H	B	B	H	A	H	B	B	A	H	B	H
2_43884	2	17.48	H	H	H	B	B	B	H	H	H	H	A	A	H	H	A	B	H	H	B	H	A	A	B	H	B	A	H	H	H	H	B	A	H	H	H	H	B	B	H	A	H	B	B	A	H	B	H
2_45494	2	17.48	H	-	-	B	B	B	H	H	H	H	A	A	H	H	A	B	H	H	B	H	A	A	B	H	B	A	H	H	H	H	B	A	H	H	H	H	B	B	H	A	H	B	B	A	H	B	H
2_47569	2	17.48	H	H	H	B	B	B	H	H	H	H	A	A	H	H	A	B	H	H	B	H	A	A	B	H	B	A	H	H	H	H	B	A	H	H	H	H	B	B	H	A	H	B	B	A	H	B	H
2_49651	2	17.48	H	H	H	B	B	B	H	H	H	H	A	A	H	H	A	B	H	H	B	H	A	A	B	H	B	A	H	H	H	H	B	A	H	H	H	H	B	-	H	A	H	B	B	A	H	B	H
2_49857	2	17.48	H	H	H	B	B	B	H	H	H	H	A	A	H	H	A	B	H	H	B	H	A	A	B	H	B	A	H	H	H	H	B	A	H	H	H	H	B	B	H	A	H	B	B	A	H	B	H
2_52100	2	17.48	H	-	-	B	-	B	H	-	-	-	A	A	H	H	A	B	H	H	B	H	A	A	B	H	B	A	H	H	H	H	B	A	H	H	H	H	B	B	H	A	H	B	B	A	H	B	H
2_55322	2	17.48	H	H	H	B	B	B	H	H	H	H	A	A	H	H	A	B	H	H	B	H	A	A	B	H	B	A	H	H	H	H	B	A	H	H	H	H	B	B	H	A	H	B	B	A	H	B	H
2_03027	2	17.9	H	H	H	B	B	B	H	H	H	H	A	A	H	H	A	B	H	H	B	H	A	A	B	H	B	A	H	H	H	H	B	A	H	H	H	H	B	B	H	A	H	B	B	A	H	B	H
2_07215	2	17.9	H	H	H	B	B	B	H	H	H	H	A	A	H	H	A	B	H	H	B	H	A	A	B	H	B	A	H	H	H	H	B	A	H	H	H	H	B	B	H	A	H	B	B	A	H	B	H
2_07216	2	17.9	H	H	H	B	B	B	H	H	H	H	A	A	H	H	A	B	H	H	B	H	A	A	B	H	B	A	H	H	H	H	B	A	H	H	H	H	B	B	H	A	H	B	B	A	H	B	H
2_09029	2	17.9	H	H	H	B	B	B	H	H	H	H	A	A	H	H	A	B	H	H	B	H	A	A	B	H	B	A	H	H	H	H	B	A	H	H	H	H	B	B	H	A	H	B	B	A	H	B	H
2_10217	2	17.9	H	H	H	B	B	B	H	H	H	H	A	A	H	H	A	B	H	H	B	H	A	A	B	H	B	A	H	H	H	H	B	A	H	H	H	H	B	B	H	A	H	B	B	A	H	B	H
2_10218	2	17.9	H	H	H	B	B	B	H	H	H	H	A	A	H	H	A	B	H	H	B	H	A	A	B	H	B	A	H	H	H	H	B	A	H	H	H	H	B	B	H	A	H	B	B	A	H	B	H
2_11524	2	17.9	H	H	H	B	B	B	H	H	H	H	A	A	H	H	A	B	H	H	B	H	A	A	B	H	B	A	H	H	H	H	B	A	H	H	H	H	B	B	H	A	H	B	B	A	H	B	H
2_14516	2	17.9	H	H	H	-	-	B	H	H	H	H	A	A	-	-	A	B	H	H	B	H	A	A	B	H	B	A	-	-	H	H	B	A	H	H	H	H	B	B	H	A	H	B	B	A	H	B	H
2_17998	2	17.9	H	H	H	B	B	B	H	H	H	H	A	A	H	H	A	B	H	H	B	H	A	A	B	H	B	A	H	H	H	H	B	A	H	H	H	H	B	B	H	A	H	B	B	A	H	B	H
2_20315	2	17.9	H	H	H	B	B	B	H	H	H	H	A	A	H	H	A	B	H	H	B	H	A	A	B	H	B	A	H	H	H	H	B	A	H	H	H	H	B	B	H	A	H	B	B	A	H	B	H
2_20485	2	17.9	H	H	H	B	B	B	H	H	H	H	A	A	H	H	A	B	H	H	B	H	A	A	B	H	B	A	H	H	H	H	B	A	H	H	H	H	B	B	H	A	H	B	B	A	H	B	H
2_25452	2	17.9	H	H	H	B	B	B	H	H	H	H	A	A	H	H	A	B	H	H	B	H	A	A	B	H	B	A	H	H	H	H	B	A	H	H	H	H	B	B	H	A	H	B	B	A	H	B	H
2_27450	2	17.9	H	H	H	B	B	B	H	H	H	H	A	A	H	H	A	B	H	H	B	H	A	A	B	H	B	A	H	H	H	H	B	A	H	H	H	H	B	B	H	A	H	B	B	A	H	B	H
2_33437	2	17.9	H	H	H	B	B	B	H	H	H	H	A	A	H	H	A	B	H	H	B	H	A	A	B	H	B	A	H	H	H	H	B	A	H	H	H	H	B	B	H	A	H	B	B	A	H	B	H
2_37318	2	17.9	H	H	H	B	B	B	H	H	H	H	A	A	H	H	A	B	H	H	B	H	A	A	B	H	B	A	H	H	H	H	B	A	H	H	H	H	B	B	H	A	H	B	B	A	H	B	H
2_37552	2	17.9	H	H	H	B	B	B	H	H	H	H	A	A	H	H	A	B	H	H	B	H	A	A	B	H	B	A	H	H	H	H	B	A	H	H	H	H	B	B	H	A	H	B	B	A	H	B	H
2_42577	2	17.9	H	H	H	B	B	B	H	H	H	H	A	A	H	H	A	B	H	H	B	H	A	A	B	H	B	A	H	H	H	H	B	A	H	H	H	H	B	B	H	A	H	B	B	A	H	B	H
2_43757	2	17.9	H	H	H	B	B	B	H	H	H	H	A	A	H	H	A	B	H	H	B	H	A	A	B	H	B	A	H	H	H	H	B	A	H	H	H	H	B	B	H	A	H	B	B	A	H	B	H
2_44208	2	17.9	H	H	H	B	B	B	H	H	H	H	A	A	H	H	A	B	H	H	B	H	A	A	B	H	B	A	H	H	H	H	B	A	H	H	H	H	B	B	H	A	H	B	B	A	H	B	H
2_47594	2	17.9	H	H	H	B	B	B	H	H	H	H	A	A	H	H	A	B	H	H	B	H	A	A	B	H	B	A	H	H	H	H	B	A	H	H	H	H	B	B	H	A	H	B	B	A	H	B	H
2_47863	2	17.9	H	H	H	B	B	B	H	H	H	H	A	A	H	H	A	B	H	H	B	H	A	A	B	H	B	A	H	H	H	H	B	A	H	H	H	H	B	B	H	A	H	B	B	A	H	B	H
2_49259	2	17.9	H	H	H	B	B	B	H	H	H	H	A	A	H	H	A	B	H	H	B	H	A	A	B	H	B	A	H	H	H	H	B	A	H	H	H	H	B	B	H	A	H	B	B	A	H	B	H
2_49556	2	17.9	H	H	H	B	B	B	H	H	H	H	A	A	H	H	A	B	H	H	B	H	A	A	B	H	B	A	H	H	H	H	B	A	H	H	H	H	B	B	H	A	H	B	B	A	H	B	H
2_50022	2	17.9	H	H	H	B	B	B	H	H	H	H	A	A	H	H	A	B	H	H	B	H	A	A	B	H	B	A	H	H	H	H	B	A	H	H	H	H	B	B	H	A	H	B	B	A	H	B	H
2_51944	2	17.9	H	H	H	B	B	B	H	H	H	H	A	A	H	H	A	B	H	H	B	H	A	A	B	H	B	A	H	H	H	H	B	A	H	H	H	H	B	B	H	A	H	B	B	A	H	B	H
2_52854	2	17.9	H	H	H	-	-	B	H	H	H	H	A	A	-	H	A	B	H	H	B	H	A	A	B	H	B	A	-	H	H	H	B	A	H	H	H	H	B	B	H	A	H	B	B	A	H	B	H
2_53176	2	17.9	H	H	H	B	B	B	H	H	H	H	A	A	H	H	A	B	H	H	B	H	A	A	B	H	B	A	H	H	H	H	B	A	H	H	H	H	B	B	H	A	H	B	B	A	H	B	H
2_54861	2	17.9	H	H	H	B	B	B	H	H	H	H	A	A	H	H	A	B	H	H	B	H	A	A	B	H	B	A	H	H	H	H	B	A	H	H	H	H	B	B	H	A	H	B	B	A	H	B	H
2_21892	2	18.321	H	H	H	B	B	B	H	H	H	H	A	A	H	H	A	B	H	H	B	H	A	A	B	H	B	A	H	H	H	H	B	A	H	H	H	H	B	B	H	A	H	B	B	A	H	B	H
2_34255	2	18.321	H	H	H	B	B	B	H	H	H	H	A	A	H	H	A	B	H	H	B	H	A	A	B	H	B	A	H	H	H	H	B	A	H	H	H	H	B	B	H	A	H	B	B	A	H	B	H
2_47805	2	18.321	H	H	H	-	B	B	H	H	H	H	A	A	H	H	A	B	H	H	B	H	A	A	B	H	B	A	H	H	H	H	B	A	H	H	H	H	B	B	H	A	H	B	B	A	H	B	H
2_53057	2	18.321	H	H	H	B	B	B	H	H	H	H	A	A	H	H	A	B	H	H	B	H	A	A	B	H	B	A	H	H	H	H	B	A	H	H	H	H	B	B	H	A	H	B	B	A	H	B	H
2_55419	2	18.321	H	H	H	B	B	B	H	H	H	H	A	A	H	H	A	B	H	H	B	H	A	A	B	H	B	A	H	H	H	H	B	A	H	H	H	H	B	B	H	A	H	B	B	A	H	B	H
2_34052	2	20.086	-	A	H	B	B	B	H	H	H	H	A	A	H	H	A	B	H	H	B	H	A	A	B	H	B	A	H	H	H	H	B	A	H	H	H	H	B	B	H	A	H	B	B	A	H	B	H
2_13779	2	20.926	H	A	H	B	B	B	H	H	H	H	A	A	H	H	A	B	H	H	B	H	A	A	B	H	B	A	H	H	H	H	B	A	H	A	H	H	B	B	H	A	H	B	B	A	H	B	H
2_13780	2	20.926	H	A	H	B	B	B	H	H	H	H	A	A	H	H	A	B	H	H	B	H	A	A	B	H	B	A	H	H	H	H	B	A	H	A	H	H	B	B	H	A	H	B	B	A	H	B	H
2_32890	2	21.767	H	A	H	B	B	B	H	H	H	H	A	A	H	H	A	B	B	H	B	H	A	A	B	H	B	A	H	H	H	H	B	A	H	A	H	H	B	B	H	A	H	B	B	A	H	B	H
2_03273	2	22.187	H	A	H	B	B	B	H	H	H	H	A	A	H	H	A	B	B	B	B	H	A	A	B	H	B	A	H	H	H	H	B	A	H	A	H	H	B	B	H	A	H	B	B	A	H	B	H
2_08247	2	22.187	H	A	H	B	B	B	H	H	H	H	A	A	H	H	A	B	B	B	B	H	A	A	B	H	B	A	H	H	H	H	B	A	H	A	H	H	B	B	H	A	H	B	B	A	H	B	H
2_39678	2	22.187	H	A	H	B	B	B	H	H	H	H	A	A	H	H	A	B	B	B	B	H	A	A	B	H	B	A	H	H	H	H	B	A	H	A	H	H	B	B	H	A	H	B	B	A	H	B	H
2_49719	2	22.187	H	A	H	-	-	B	H	H	H	H	A	A	H	H	A	B	B	B	B	H	A	A	B	H	B	A	H	H	H	H	B	A	H	A	H	H	B	B	H	A	H	-	B	A	H	B	H
2_54185	2	22.187	H	A	H	B	B	B	H	H	H	H	A	A	H	H	A	B	B	B	B	H	A	A	B	H	B	A	H	H	H	H	B	A	H	A	H	H	B	B	H	A	H	B	B	A	H	B	H
2_03030	2	22.607	H	A	H	B	B	B	H	H	H	H	A	A	H	H	A	B	B	B	B	H	A	A	B	H	B	A	H	H	H	H	B	A	H	A	H	H	B	B	H	A	H	B	B	A	H	B	H
2_09625	2	22.607	H	A	H	B	B	B	H	H	H	H	A	A	H	H	A	B	B	B	B	H	A	A	B	H	B	A	H	H	H	H	B	A	H	A	H	H	B	B	H	A	H	B	B	A	H	B	H
2_18331	2	22.607	H	A	H	B	B	B	H	H	H	H	A	A	H	H	A	B	B	B	B	H	A	A	B	H	B	A	H	H	H	H	B	A	H	A	H	H	B	B	H	A	H	B	B	A	H	B	H
2_25757	2	22.607	H	A	H	B	B	B	H	H	H	H	A	A	H	H	A	B	B	B	B	H	A	A	B	H	B	A	H	H	H	H	B	A	H	A	H	H	B	B	H	A	H	B	B	A	H	B	H
2_28220	2	22.607	H	A	H	B	B	B	H	H	H	H	A	A	H	H	A	B	B	B	B	H	A	A	B	H	B	A	H	H	H	H	B	A	H	A	H	H	B	B	H	A	H	B	B	A	H	B	H
2_28221	2	22.607	H	A	H	B	B	B	H	H	H	H	A	A	H	H	A	B	B	B	B	H	A	A	B	H	B	A	H	H	H	H	B	A	H	A	H	H	B	B	H	A	H	B	B	A	H	B	H
2_28764	2	22.607	H	A	H	B	B	B	H	H	H	H	A	A	H	H	A	B	B	B	B	H	A	A	B	H	B	A	H	H	H	H	B	A	H	A	H	H	B	B	H	A	H	B	B	A	H	B	H
2_46397	2	22.607	H	A	H	B	B	B	H	H	H	H	A	A	H	H	A	B	B	B	B	H	A	A	B	H	B	A	H	H	H	H	B	A	H	A	H	H	B	B	H	A	H	B	B	A	H	B	H
2_48305	2	22.607	H	A	H	B	B	B	H	H	H	H	A	A	H	H	A	B	B	B	B	H	A	A	B	H	B	A	H	H	H	H	B	A	H	A	H	H	B	B	H	A	H	B	B	A	H	B	H
2_50929	2	22.607	H	A	H	B	B	B	H	H	H	H	A	A	H	H	A	B	B	B	B	H	A	A	B	H	B	A	H	H	H	H	B	A	H	A	H	H	B	B	H	A	H	B	B	A	H	B	H
2_55278	2	22.607	H	A	H	B	B	B	H	H	H	H	A	A	H	H	A	B	B	B	B	H	A	A	B	H	B	A	H	H	H	H	B	A	H	A	H	H	B	B	H	A	H	B	B	A	H	B	H
2_06076	2	23.027	H	A	H	B	B	B	H	H	H	H	A	A	H	H	A	B	B	B	B	H	A	A	B	H	B	A	H	H	H	H	B	A	H	A	H	H	B	B	H	A	H	B	B	A	H	B	H
2_08540	2	23.027	H	A	H	B	B	B	H	H	H	H	A	A	H	H	A	B	B	B	B	H	A	A	B	H	B	A	H	H	H	H	B	A	H	A	H	H	B	B	H	A	H	B	B	A	H	B	H
2_08541	2	23.027	H	A	H	B	B	B	H	H	H	H	A	A	H	H	A	B	B	B	B	H	A	A	B	H	B	A	H	H	H	H	B	A	H	A	H	H	B	B	H	A	H	B	B	A	H	B	H
2_16204	2	23.027	H	A	H	B	B	B	H	H	H	H	A	A	H	H	A	B	B	B	B	H	A	A	B	H	B	A	H	H	H	H	B	A	H	A	H	H	B	B	H	A	H	B	B	A	H	B	H
2_16205	2	23.027	H	A	H	B	B	B	H	H	H	H	A	A	H	H	A	B	B	B	B	H	A	A	B	H	B	A	H	H	H	H	B	A	H	A	H	H	B	B	H	A	H	B	B	A	H	B	H
2_18962	2	23.027	H	A	H	B	B	B	H	H	H	H	A	A	H	H	A	B	B	B	B	H	A	A	B	H	B	A	H	H	H	H	B	A	H	A	H	H	B	B	H	A	H	B	B	A	H	B	H
2_19543	2	23.027	H	A	H	B	B	B	H	H	H	H	A	A	H	H	A	B	B	B	B	H	A	A	B	H	B	A	H	H	H	H	B	A	H	A	H	H	B	B	H	A	H	B	B	A	H	B	H
2_26998	2	23.027	H	A	H	B	B	B	H	H	H	H	A	A	H	H	A	B	B	B	B	H	A	A	B	H	B	A	H	H	H	H	B	A	H	A	H	H	B	B	H	A	H	B	B	A	H	B	H
2_30961	2	23.027	H	A	H	B	B	B	H	H	H	H	A	A	H	H	A	B	B	B	B	H	A	A	B	H	B	A	H	H	H	H	B	A	H	A	H	H	B	B	H	A	H	B	B	A	H	B	H
2_38599	2	23.027	H	A	H	B	B	B	H	H	H	H	A	A	H	H	A	B	B	B	B	H	A	A	B	H	B	A	H	H	H	H	B	A	H	A	H	H	B	B	H	A	H	B	B	A	H	B	H
2_38600	2	23.027	H	A	H	B	B	B	H	H	H	H	A	A	H	H	A	B	B	B	B	H	A	A	B	H	B	A	H	H	H	H	B	A	H	A	H	H	B	B	H	A	H	B	B	A	H	B	H
2_43026	2	23.027	H	A	H	B	B	B	H	H	H	H	A	A	H	H	A	B	B	B	B	H	A	A	B	H	B	A	H	H	H	H	B	A	H	A	H	H	B	B	H	A	H	B	B	A	H	B	H
2_44804	2	23.027	H	A	H	B	B	B	H	H	H	H	A	A	H	H	A	B	B	B	B	H	A	A	B	H	B	A	H	H	H	H	B	A	H	A	H	H	B	B	H	A	H	B	B	A	H	B	H
2_52798	2	23.027	H	A	H	B	B	B	H	H	H	H	A	A	H	H	A	B	B	B	B	H	A	A	B	H	B	A	H	H	H	H	B	A	H	A	H	H	B	B	H	A	H	B	B	A	H	B	H
2_01109	2	23.448	H	A	H	B	B	B	H	H	H	H	A	A	H	H	A	B	B	B	B	H	A	A	B	H	B	A	H	H	H	H	B	A	H	A	H	H	B	B	H	A	H	B	B	A	H	B	H
2_01110	2	23.448	H	A	H	B	B	B	H	H	H	H	A	A	H	H	A	B	B	B	B	H	A	A	B	H	B	A	H	H	H	H	B	A	H	A	H	H	B	B	H	A	H	B	B	A	H	B	H
2_49667	2	23.448	H	A	H	B	B	B	H	H	H	H	A	A	H	H	A	B	B	B	B	H	A	A	B	H	B	A	H	H	H	H	B	A	H	A	H	H	B	B	H	A	H	B	B	A	H	B	H
2_20629	2	26.055	H	A	H	B	B	B	H	H	H	A	A	A	H	H	H	B	B	B	B	H	A	A	B	A	B	A	H	H	H	H	B	A	H	H	H	H	B	B	H	A	H	B	B	A	H	B	H
2_21378	2	26.895	H	A	H	B	B	B	H	H	H	A	A	A	H	H	H	B	B	B	B	H	A	A	B	A	B	A	H	H	H	H	B	A	H	H	H	H	B	B	H	A	H	B	B	A	H	B	H
2_31459	2	26.895	H	A	H	B	B	B	H	H	H	A	A	A	H	H	H	B	B	B	B	H	A	A	B	A	B	A	H	H	H	H	B	A	H	H	H	H	B	B	H	A	H	B	B	A	H	B	H
2_42542	2	26.895	H	A	H	B	B	B	H	H	H	A	A	A	H	H	H	B	B	B	B	H	A	A	B	A	B	A	H	H	H	H	B	A	H	H	H	H	B	B	H	A	H	B	B	A	H	B	H
2_48183	2	26.895	H	A	H	B	B	B	H	H	H	A	A	A	H	H	H	B	B	B	B	H	A	A	B	A	B	A	H	H	H	H	B	A	H	H	H	H	B	B	H	A	H	B	B	A	H	B	H
1_0439	2	27.316	H	A	H	B	B	B	H	H	H	A	A	A	H	H	H	B	B	B	B	H	A	A	B	A	B	A	H	H	H	H	B	A	H	H	H	H	B	B	H	A	H	B	B	A	H	B	H
2_00036	2	27.316	H	A	H	B	B	B	H	H	H	A	A	A	H	H	H	B	B	B	B	H	A	A	B	A	B	A	H	H	H	H	B	A	H	H	H	H	B	B	H	A	H	B	B	A	H	B	H
2_00037	2	27.316	H	A	H	B	B	B	H	H	H	A	A	A	H	H	H	B	B	B	B	H	A	A	B	A	B	A	H	H	H	H	B	A	H	H	H	H	B	B	H	A	H	B	B	A	H	B	H
2_03860	2	27.316	H	A	H	B	B	B	H	H	H	A	A	A	H	H	H	B	B	B	B	H	A	A	B	A	B	A	H	H	H	H	B	A	H	H	H	H	B	B	H	A	H	B	B	A	H	B	H
2_10042	2	27.316	H	A	H	B	B	B	H	H	H	A	A	A	H	H	H	B	B	B	B	H	A	A	B	A	B	A	H	H	H	H	B	A	H	H	H	H	B	B	H	A	H	B	B	A	H	B	H
2_10043	2	27.316	H	A	H	B	B	B	H	H	H	A	A	A	H	H	H	B	B	B	B	H	A	A	B	A	B	A	H	H	H	H	B	A	H	H	H	H	B	B	H	A	H	B	B	A	H	B	H
2_12370	2	27.316	H	A	H	B	B	B	H	H	H	A	A	A	H	H	H	B	B	B	B	H	A	A	B	A	B	A	H	H	H	H	B	A	H	H	H	H	B	B	H	A	H	B	B	A	H	B	H
2_12371	2	27.316	H	A	H	B	B	B	H	H	H	A	A	A	H	H	H	B	B	B	B	H	A	A	B	A	B	A	H	H	H	H	B	A	H	H	H	H	B	B	H	A	H	B	B	A	H	B	H
2_12372	2	27.316	H	A	H	B	B	B	H	H	H	A	A	A	H	H	H	B	B	B	B	H	A	A	B	A	B	A	H	H	H	H	B	A	H	H	H	H	B	B	H	A	H	B	B	A	H	B	H
2_12681	2	27.316	H	A	H	B	B	B	H	H	H	A	A	A	H	H	H	B	B	B	B	H	A	A	B	A	B	A	H	H	H	H	B	A	H	H	H	H	B	B	H	A	H	B	B	A	H	B	H
2_12917	2	27.316	H	A	H	B	B	B	H	H	H	A	A	A	H	H	H	B	B	B	B	H	A	A	B	A	B	A	H	H	H	H	B	A	H	H	H	H	B	B	H	A	H	B	B	A	H	B	H
2_22095	2	27.316	H	A	H	B	B	B	H	H	H	A	A	A	H	H	H	B	B	B	B	H	A	A	B	A	B	A	H	H	H	H	B	A	H	H	H	H	B	B	H	A	H	B	B	A	H	B	H
2_22096	2	27.316	H	A	H	B	B	B	H	H	H	A	A	A	H	H	H	B	B	B	B	H	A	A	B	A	B	A	H	H	H	H	B	A	H	H	H	H	B	B	H	A	H	B	B	A	H	B	H
2_29263	2	27.316	H	A	H	B	B	B	H	H	H	A	A	A	H	H	H	B	B	B	B	H	A	A	B	A	B	A	H	H	H	H	B	A	H	H	H	H	B	B	H	A	H	B	B	A	H	B	H
2_40369	2	27.316	H	A	H	B	B	B	H	H	H	A	A	A	H	H	H	B	B	B	B	H	A	A	B	A	B	A	H	H	H	H	B	A	H	H	H	H	B	B	H	A	H	B	B	A	H	B	H
2_02435	2	28.156	H	A	H	B	B	B	H	H	H	A	A	A	H	H	H	B	B	B	B	H	A	A	B	A	B	A	H	H	H	H	B	A	H	H	H	H	B	B	H	A	H	B	B	A	H	B	H
2_05604	2	28.156	H	A	H	B	B	B	H	H	H	A	A	A	H	H	H	B	B	B	B	H	A	A	B	A	B	A	H	H	H	H	B	A	H	H	H	H	B	B	H	A	H	B	B	A	H	B	H
2_05605	2	28.156	H	A	H	B	B	B	H	H	H	A	A	A	H	H	H	B	B	B	B	H	A	A	B	A	B	A	H	H	H	H	B	A	H	H	H	H	B	B	H	A	H	B	B	A	H	B	H
2_07836	2	28.156	H	A	H	B	B	B	H	H	H	A	A	A	H	H	H	B	B	B	B	H	A	A	B	A	B	A	H	H	H	H	B	A	H	H	H	H	B	B	H	A	H	B	B	A	H	B	H
2_07838	2	28.156	H	A	H	B	B	B	H	H	H	A	A	A	H	H	H	B	B	B	B	H	A	A	B	A	B	A	H	H	H	H	B	A	H	H	H	H	B	B	H	A	H	B	B	A	H	B	H
2_07839	2	28.156	H	A	H	B	B	B	H	H	H	A	A	A	H	H	H	B	B	B	B	H	A	A	B	A	B	A	H	H	H	H	B	A	H	H	H	H	B	B	H	A	H	B	B	A	H	B	H
2_15068	2	28.156	H	A	H	B	B	B	H	H	H	A	A	A	H	H	H	B	B	B	B	H	A	A	B	A	B	A	H	H	H	H	B	A	H	H	H	H	B	B	H	A	H	B	B	A	H	B	H
2_15069	2	28.156	H	A	H	B	B	B	H	H	H	A	A	A	H	H	H	B	B	B	B	H	A	A	B	A	B	A	H	H	H	H	B	A	H	H	H	H	B	B	H	A	H	B	B	A	H	B	H
2_16113	2	28.156	H	A	H	B	B	B	H	H	H	A	A	A	H	H	H	B	B	B	B	H	A	A	B	A	B	A	H	H	H	H	B	A	H	H	H	H	B	B	H	A	H	B	B	A	H	B	H
2_22569	2	28.156	H	A	H	B	B	B	H	H	H	A	A	A	H	H	H	B	B	B	B	H	A	A	B	A	B	A	H	H	H	H	B	A	H	H	H	H	B	B	H	A	H	B	B	A	H	B	H
2_22570	2	28.156	H	A	H	B	B	B	H	H	H	A	A	A	H	H	H	B	B	B	B	H	A	A	B	A	B	A	H	H	H	H	B	A	H	H	H	H	B	B	H	A	H	B	B	A	H	B	H
2_23480	2	28.156	H	A	H	B	B	B	H	H	H	A	A	A	H	H	H	B	B	B	B	H	A	A	B	A	B	A	H	H	H	H	B	A	H	H	H	H	B	B	H	A	H	B	B	A	H	B	H
2_25478	2	28.156	H	A	H	B	B	B	H	H	H	A	A	A	H	H	H	B	B	B	B	H	A	A	B	A	B	A	H	H	H	H	B	A	H	H	H	H	B	B	H	A	H	B	B	A	H	B	H
2_25479	2	28.156	H	A	H	-	B	B	H	H	H	A	A	A	H	H	H	B	B	B	B	H	A	A	B	A	B	A	H	H	H	H	B	A	H	H	H	H	B	B	H	A	H	B	B	A	H	B	H
2_27412	2	28.156	H	A	H	B	B	B	H	H	H	A	A	A	H	H	H	B	B	B	B	H	A	A	B	A	B	A	H	H	H	H	B	A	H	H	H	H	B	B	H	A	H	B	B	A	H	B	H
2_40145	2	28.156	H	A	H	B	B	B	H	H	H	A	A	A	H	H	H	B	B	B	B	H	A	A	B	A	B	A	H	H	H	H	B	A	H	H	H	H	B	B	H	A	H	B	B	A	H	B	H
2_41515	2	28.156	H	A	H	B	B	B	H	H	H	A	A	A	H	H	H	B	B	B	B	H	A	A	B	A	B	A	H	H	H	H	B	A	H	H	H	H	B	B	H	A	H	B	B	A	H	B	H
2_41555	2	28.156	H	A	H	B	B	B	H	H	H	A	A	A	H	H	H	B	B	B	B	H	A	A	B	A	B	A	H	H	H	H	B	A	H	H	H	H	B	B	H	A	H	B	B	A	H	B	H
2_43250	2	28.156	H	A	H	B	B	B	H	H	H	A	A	A	H	H	H	B	B	B	B	H	A	A	B	A	B	A	H	H	H	H	B	A	H	H	H	H	B	B	H	A	H	B	B	A	H	B	H
2_43324	2	28.156	H	A	H	B	B	B	H	H	H	A	A	A	H	H	H	B	B	B	B	H	A	A	B	A	B	A	H	H	H	H	B	A	H	H	H	H	B	B	H	A	H	B	B	A	H	B	H
2_47504	2	28.156	H	A	H	B	B	B	H	H	H	A	A	A	H	H	H	B	B	B	B	H	A	A	B	A	B	A	H	H	H	H	B	A	H	H	H	H	B	B	H	A	H	B	B	A	H	B	H
2_48752	2	28.156	H	A	H	B	B	B	H	H	H	A	A	A	H	H	H	B	B	B	B	H	A	A	B	A	B	A	H	H	H	H	B	A	H	H	H	H	B	B	H	A	H	B	B	A	H	B	H
2_49995	2	28.156	H	A	H	B	B	B	H	H	H	A	A	A	H	H	H	B	B	B	B	H	A	A	B	A	B	A	H	H	H	H	B	A	H	H	H	H	B	B	H	A	H	B	B	A	H	B	H
2_52754	2	28.156	H	A	H	B	B	B	H	H	H	A	A	A	H	H	H	B	B	B	B	H	A	A	B	A	B	A	H	H	H	H	B	A	H	H	H	H	B	B	H	A	H	B	B	A	H	B	H
1_1026	2	28.576	H	A	H	B	B	B	H	H	H	A	A	A	H	H	H	B	B	B	B	H	A	A	B	A	B	A	H	H	H	H	B	A	H	H	H	H	B	B	H	A	H	B	B	A	H	B	H
2_04858	2	28.576	H	A	H	B	B	B	H	H	H	A	A	A	H	H	H	B	B	B	B	H	A	A	B	A	B	A	H	H	H	H	B	A	H	H	H	H	B	B	H	A	H	B	B	A	H	B	H
2_04859	2	28.576	H	A	H	B	B	B	H	H	H	A	A	A	H	H	H	B	B	B	B	H	A	A	B	A	B	A	H	H	H	H	B	A	H	H	H	H	B	B	H	A	H	B	B	A	H	B	H
2_05424	2	28.576	H	A	H	B	B	B	H	H	H	A	A	A	H	H	H	B	B	B	B	H	A	A	B	A	B	A	H	H	H	H	B	A	H	H	H	H	B	B	H	A	H	B	B	A	H	B	H
2_05885	2	28.576	H	A	H	B	B	B	H	H	H	A	A	A	H	H	H	B	B	B	B	H	A	A	B	A	B	A	H	H	H	H	B	A	H	H	H	H	B	B	H	A	H	B	B	A	H	B	H
2_06174	2	28.576	H	A	H	B	B	B	H	H	H	A	A	A	H	H	H	B	B	B	B	H	A	A	B	A	B	A	H	H	H	H	B	A	H	H	H	H	B	B	H	A	H	B	B	A	H	B	H
2_06175	2	28.576	H	A	H	B	B	B	H	H	H	A	A	A	H	H	H	B	B	B	B	H	A	A	B	A	B	A	H	H	H	H	B	A	H	H	H	H	B	B	H	A	H	B	B	A	H	B	H
2_06177	2	28.576	H	A	H	B	B	B	H	H	H	A	A	A	H	H	H	B	B	B	B	H	A	A	B	A	B	A	H	H	H	H	B	A	H	H	H	H	B	B	H	A	H	B	B	A	H	B	H
2_07540	2	28.576	H	A	H	B	B	B	H	H	H	A	A	A	H	H	H	B	B	B	B	H	A	A	B	A	B	A	H	H	H	H	B	A	H	H	H	H	B	B	H	A	H	B	B	A	H	B	H
2_07541	2	28.576	H	A	H	B	B	B	H	H	H	A	A	A	H	H	H	B	B	B	B	H	A	A	B	A	B	A	H	H	H	H	B	A	H	H	H	H	B	B	H	A	H	B	B	A	H	B	H
2_07948	2	28.576	H	A	H	B	B	B	H	H	H	A	A	A	H	H	H	B	B	B	B	H	A	A	B	A	B	A	H	H	H	H	B	A	H	H	H	H	B	B	H	A	H	B	B	A	H	B	H
2_07949	2	28.576	H	A	H	B	B	B	H	H	H	A	A	A	H	H	H	B	B	B	B	H	A	A	B	A	B	A	H	H	H	H	B	A	H	H	H	H	B	B	H	A	H	B	B	A	H	B	H
2_11273	2	28.576	H	A	H	B	B	B	H	H	H	A	A	A	H	H	H	B	B	B	B	H	A	A	B	A	B	A	H	H	H	H	B	A	H	H	H	H	B	B	H	A	H	B	B	A	H	B	H
2_12470	2	28.576	H	A	H	B	B	B	H	H	H	A	A	A	H	H	H	B	B	B	B	H	A	A	B	A	B	A	H	H	H	H	B	A	H	H	H	H	B	B	H	A	H	B	B	A	H	B	H
2_12471	2	28.576	H	A	H	B	B	B	H	H	H	A	A	A	H	H	H	B	B	B	B	H	A	A	B	A	B	A	H	H	H	H	B	A	H	H	H	H	B	B	H	A	H	B	B	A	H	B	H
2_13688	2	28.576	H	A	H	B	B	B	H	H	H	A	A	A	H	H	H	B	B	B	B	H	A	A	B	A	B	A	H	H	H	H	B	A	H	H	H	H	B	B	H	A	H	B	B	A	H	B	H
2_13689	2	28.576	H	A	H	B	B	B	H	H	H	A	A	A	H	H	H	B	B	B	B	H	A	A	B	A	B	A	H	H	H	H	B	A	H	H	H	H	B	B	H	A	H	B	B	A	H	B	H
2_14252	2	28.576	H	A	H	B	B	B	H	H	H	A	A	A	H	H	H	B	B	B	B	H	A	A	B	A	B	A	H	H	H	H	B	A	H	H	H	H	B	B	H	A	H	B	B	A	H	B	H
2_17089	2	28.576	H	A	H	B	B	B	H	H	H	A	A	A	H	H	H	B	B	B	B	H	A	A	B	A	B	A	H	H	H	H	B	A	H	H	H	H	B	B	H	A	H	B	B	A	H	B	H
2_20432	2	28.576	H	A	H	B	B	B	H	H	H	A	A	A	H	H	H	B	B	B	B	H	A	A	B	A	B	A	H	H	H	H	B	A	H	H	H	H	B	B	H	A	H	B	B	A	H	B	H
2_25704	2	28.576	H	A	H	B	B	B	H	H	H	A	A	A	H	H	H	B	B	B	B	H	A	A	B	A	B	A	H	H	H	H	B	A	H	H	H	H	B	B	H	A	H	B	B	A	H	B	H
2_26918	2	28.576	H	A	H	B	B	B	H	H	H	A	A	A	H	H	H	B	B	B	B	H	A	A	B	A	B	A	H	H	H	H	B	A	H	H	H	H	B	B	H	A	H	B	B	A	H	B	H
2_27686	2	28.576	H	A	H	B	B	B	H	H	H	A	A	A	H	H	H	B	B	B	B	H	A	A	B	A	B	A	H	H	H	H	B	A	H	H	H	H	B	B	H	A	H	B	B	A	H	B	H
2_28015	2	28.576	H	A	H	B	B	B	H	H	H	A	A	A	H	H	H	B	B	B	B	H	A	A	B	A	B	A	H	H	H	H	B	A	H	H	H	H	B	B	H	A	H	B	B	A	H	B	H
2_28027	2	28.576	H	A	H	B	B	B	H	H	H	A	A	A	H	H	H	B	B	B	B	H	A	A	B	A	B	A	H	H	H	H	B	A	H	H	H	H	B	B	H	A	H	B	B	A	H	B	H
2_32273	2	28.576	H	A	H	B	B	B	H	H	H	A	A	A	H	H	H	B	B	B	B	H	A	A	B	A	B	A	H	H	H	H	B	A	H	H	H	H	B	B	H	A	H	B	B	A	H	B	H
2_37915	2	28.576	H	A	H	B	B	B	H	H	H	A	A	A	H	H	H	B	B	B	B	H	A	A	B	A	B	A	H	H	H	H	B	A	H	H	H	H	B	B	H	A	H	B	B	A	H	B	H
2_45209	2	28.576	H	A	H	B	B	B	H	H	H	A	A	A	H	H	H	B	B	B	B	H	A	A	B	A	B	A	H	H	H	H	B	A	H	H	H	H	B	B	H	A	H	B	B	A	H	B	H
2_45760	2	28.576	H	A	H	B	B	B	H	H	H	A	A	A	H	H	H	B	B	B	B	H	A	A	B	A	B	A	H	H	H	H	B	A	H	H	H	H	B	B	H	A	H	B	B	A	H	B	H
2_46092	2	28.576	H	A	H	B	B	B	H	H	H	A	A	A	H	H	H	B	B	B	B	H	A	A	B	A	B	A	H	H	H	H	B	A	H	H	H	H	B	B	H	A	H	B	B	A	H	B	H
2_49801	2	28.576	H	A	H	B	B	B	H	H	H	A	A	A	H	H	H	B	B	B	B	H	A	A	B	A	B	A	H	H	H	H	B	A	H	H	H	H	B	B	H	A	H	B	B	A	H	B	H
2_51800	2	28.576	H	A	H	B	B	B	H	H	H	A	A	A	H	H	H	B	B	B	B	H	A	A	B	A	B	A	H	H	H	H	B	A	H	H	H	H	B	B	H	A	H	B	B	A	H	B	H
2_52812	2	28.576	H	A	H	B	B	B	H	H	H	A	A	A	H	H	H	B	B	B	B	H	A	A	B	A	B	A	H	H	H	H	B	A	H	H	H	H	B	B	H	A	H	B	B	A	H	B	H
2_55499	2	28.576	H	A	H	B	B	B	H	H	H	A	A	A	H	H	H	B	B	B	B	H	A	A	B	A	B	A	H	H	H	H	B	A	H	H	H	H	B	B	H	A	H	B	B	A	H	B	H
1_0278	2	28.996	H	A	H	B	B	B	H	H	H	A	A	A	H	H	H	B	B	B	B	H	A	A	B	A	B	A	H	H	H	H	B	A	H	H	H	H	B	B	H	A	H	B	B	A	H	B	H
2_02157	2	28.996	H	A	H	B	B	B	H	H	H	A	A	A	H	H	H	B	B	B	B	H	A	A	B	A	B	A	H	H	H	H	B	A	H	H	H	H	B	B	H	A	H	B	B	A	H	B	H
2_08069	2	28.996	H	A	H	B	B	B	H	H	H	A	A	A	H	H	H	B	B	B	B	H	A	A	B	A	B	A	H	H	H	H	B	A	H	H	H	H	B	B	H	A	H	B	B	A	H	B	H
2_08070	2	28.996	H	A	H	B	B	B	H	H	H	A	A	A	H	H	H	B	B	B	B	H	A	A	B	A	B	A	H	H	H	H	B	A	H	H	H	H	B	B	H	A	H	B	B	A	H	B	H
2_09124	2	28.996	H	A	H	B	B	B	H	H	H	A	A	A	H	H	H	B	B	B	B	H	A	A	B	A	B	A	H	H	H	H	B	A	H	H	H	H	B	B	H	A	H	B	B	A	H	B	H
2_09125	2	28.996	H	A	H	B	B	B	H	H	H	A	A	A	H	H	H	B	B	B	B	H	A	A	B	A	B	A	H	H	H	H	B	A	H	H	H	H	B	B	H	A	H	B	B	A	H	B	H
2_14803	2	28.996	H	A	H	B	B	B	H	H	H	A	A	A	H	H	H	B	B	B	B	H	A	A	B	A	B	A	H	H	H	H	B	A	H	H	H	H	B	B	H	A	H	B	B	A	H	B	H
2_21348	2	28.996	H	A	H	B	B	B	H	H	H	A	A	A	H	H	H	B	B	B	B	H	A	A	B	A	B	A	H	H	H	H	B	A	H	H	H	H	B	B	H	A	H	B	B	A	H	B	H
2_27722	2	28.996	H	A	H	B	B	B	H	H	H	A	A	A	H	H	H	B	B	B	B	H	A	A	B	A	B	A	H	H	H	H	B	A	H	H	H	H	B	B	H	A	H	B	B	A	H	B	H
2_33512	2	28.996	H	A	H	B	B	B	H	H	H	A	A	A	H	H	H	B	B	B	B	H	A	A	B	A	B	A	H	H	H	H	B	A	H	H	H	H	B	B	H	A	H	B	B	A	H	B	H
2_43229	2	28.996	H	A	H	B	B	B	H	H	H	A	A	A	H	H	H	B	B	B	B	H	A	A	B	A	B	A	H	H	H	H	B	A	H	H	H	H	B	B	H	A	H	B	B	A	H	B	H
2_47917	2	28.996	H	A	H	B	B	B	H	H	H	A	A	A	H	H	H	B	B	B	B	H	A	A	B	A	B	A	H	H	H	H	B	A	H	H	H	H	B	B	H	A	H	B	B	A	H	B	H
2_49663	2	28.996	H	A	H	B	B	B	H	H	H	A	A	A	H	H	H	B	B	B	B	H	A	A	B	A	B	A	H	H	H	H	B	A	H	H	H	H	B	B	H	A	H	B	B	A	H	B	H
2_47780	2	29.417	H	A	H	B	B	B	H	H	H	A	A	A	H	H	H	B	B	B	B	H	A	A	B	A	B	A	H	H	H	H	B	A	H	H	H	H	B	B	H	A	H	B	B	A	H	B	H
1_0047	2	29.837	H	A	H	B	B	B	H	H	H	A	A	A	H	H	H	B	B	B	B	H	A	A	B	A	B	A	H	H	H	H	B	A	H	H	H	H	B	B	H	A	H	B	B	A	H	B	H
1_0108	2	29.837	H	A	H	B	B	B	H	H	H	A	A	A	H	H	H	B	B	B	B	H	A	A	B	A	B	A	H	H	H	H	B	A	H	H	H	H	B	B	H	A	H	B	B	A	H	B	H
1_1150	2	29.837	H	A	H	B	B	B	H	H	H	A	A	A	H	H	H	B	B	B	B	H	A	A	B	A	B	A	H	H	H	H	B	A	H	H	H	H	B	B	H	A	H	B	B	A	H	B	H
1_1536	2	29.837	H	A	H	B	B	B	H	H	H	A	A	A	H	H	H	B	B	B	B	H	A	A	B	A	B	A	H	H	H	H	B	A	H	H	H	H	B	B	H	A	H	B	B	A	H	B	H
2_03147	2	29.837	H	A	H	B	B	B	H	H	H	A	A	A	H	H	H	B	B	B	B	H	A	A	B	A	B	A	H	H	H	H	B	A	H	H	H	H	B	B	H	A	H	B	B	A	H	B	H
2_04737	2	29.837	H	A	H	B	B	B	H	H	H	A	A	A	H	H	H	B	B	B	B	H	A	A	B	A	B	A	H	H	H	H	B	A	H	H	H	H	B	B	H	A	H	B	B	A	H	B	H
2_04738	2	29.837	H	A	H	B	B	B	H	H	H	A	A	A	H	H	H	B	B	B	B	H	A	A	B	A	B	A	H	H	H	H	B	A	H	H	H	H	B	B	H	A	H	B	B	A	H	B	H
2_08189	2	29.837	H	A	H	B	B	B	H	H	H	A	A	A	H	H	H	B	B	B	B	H	A	A	B	A	B	A	H	H	H	H	B	A	H	H	H	H	B	B	H	A	H	B	B	A	H	B	H
2_08190	2	29.837	H	A	H	B	B	B	H	H	H	A	A	A	H	H	H	B	B	B	B	H	A	A	B	A	B	A	H	H	H	H	B	A	H	H	H	H	B	B	H	A	H	B	B	A	H	B	H
2_13631	2	29.837	H	A	H	B	B	B	H	H	H	A	A	A	H	H	H	B	B	B	B	H	A	A	B	A	B	A	H	H	H	H	B	A	H	H	H	H	B	B	H	A	H	B	B	A	H	B	H
2_15311	2	29.837	H	A	H	B	B	B	H	H	H	A	A	A	H	H	H	B	B	B	B	H	A	A	B	A	B	A	H	H	H	H	B	A	H	H	H	H	B	B	H	A	H	B	B	A	H	B	H
2_15312	2	29.837	H	A	H	B	B	B	H	H	H	A	A	A	H	H	H	B	B	B	B	H	A	A	B	A	B	A	H	H	H	H	B	A	H	H	H	H	B	B	H	A	H	B	B	A	H	B	H
2_17567	2	29.837	H	A	H	B	B	B	H	H	H	A	A	A	H	H	H	B	B	B	B	H	A	A	B	A	B	A	H	H	H	H	B	A	H	H	H	H	B	B	H	A	H	B	B	A	H	B	H
2_17568	2	29.837	H	A	H	B	B	B	H	H	H	A	A	A	H	H	H	B	B	B	B	H	A	A	B	A	B	A	H	H	H	H	B	A	H	H	H	H	B	B	H	A	H	B	B	A	H	B	H
2_17590	2	29.837	H	A	H	B	B	B	H	H	H	A	A	A	H	H	H	B	B	B	B	H	A	A	B	A	B	A	H	H	H	H	B	A	H	H	H	H	B	B	H	A	H	B	B	A	H	B	H
2_19856	2	29.837	H	A	H	B	B	B	H	H	H	A	A	A	H	H	H	B	B	B	B	H	A	A	B	A	B	A	H	H	H	H	B	A	H	H	H	H	B	B	H	A	H	B	B	A	H	B	H
2_19857	2	29.837	H	A	H	B	B	B	H	H	H	A	A	A	H	H	H	B	B	B	B	H	A	A	B	A	B	A	H	H	H	H	B	A	H	H	H	H	B	B	H	A	H	B	B	A	H	B	H
2_19985	2	29.837	H	A	H	B	B	B	H	H	H	A	A	A	H	H	H	B	B	B	B	H	A	A	B	A	B	A	H	H	H	H	B	A	H	H	H	H	B	B	H	A	H	B	B	A	H	B	H
2_19986	2	29.837	H	A	H	B	B	B	H	H	H	A	A	A	H	H	H	B	B	B	B	H	A	A	B	A	B	A	H	H	H	H	B	A	H	H	H	H	B	B	H	A	H	B	B	A	H	B	H
2_20773	2	29.837	H	A	H	B	B	B	H	H	H	A	A	A	H	H	H	B	B	B	B	H	A	A	B	A	B	A	H	H	H	H	B	A	H	H	H	H	B	B	H	A	H	B	B	A	H	B	H
2_20774	2	29.837	H	A	H	B	B	B	H	H	H	A	A	A	H	H	H	B	B	B	B	H	A	A	B	A	B	A	H	H	H	H	B	A	H	H	H	H	B	B	H	A	H	B	B	A	H	B	H
2_21153	2	29.837	H	A	H	B	B	B	H	H	H	A	A	A	H	H	H	B	B	B	B	H	A	A	B	A	B	A	H	H	H	H	B	A	H	H	H	H	B	B	H	A	H	B	B	A	H	B	H
2_26714	2	29.837	H	A	H	B	B	B	H	H	H	A	A	A	H	H	H	B	B	B	B	H	A	A	B	A	B	A	H	H	H	H	B	A	H	H	H	H	B	B	H	A	H	B	B	A	H	B	H
2_29909	2	29.837	H	A	H	B	B	B	H	H	H	A	A	A	H	H	H	B	B	B	B	H	A	A	B	A	B	A	H	H	H	H	B	A	H	H	H	H	B	B	H	A	H	B	B	A	H	B	H
2_49019	2	29.837	H	A	H	B	B	B	H	H	H	A	A	A	H	H	H	B	B	B	B	H	A	A	B	A	B	A	H	H	H	H	B	A	H	H	H	H	B	B	H	A	H	B	B	A	H	B	H
2_51671	2	29.837	H	A	H	B	B	B	H	H	H	A	A	A	H	H	H	B	B	B	B	H	A	A	B	A	B	A	H	H	H	H	B	A	H	H	H	H	B	B	H	A	H	B	B	A	H	B	H
2_10257	2	30.257	H	A	H	B	B	B	H	H	H	A	A	A	H	H	H	B	B	B	B	H	A	A	B	A	B	A	H	H	H	H	B	A	H	H	H	H	B	B	H	A	H	B	B	A	H	B	H
2_20112	2	30.257	H	A	H	B	B	B	H	H	H	A	A	A	H	H	H	B	B	B	B	H	A	A	B	A	B	A	H	H	H	H	B	A	H	H	H	H	B	B	H	A	H	B	B	A	H	B	H
2_20113	2	30.257	H	A	H	B	B	B	H	H	H	A	A	A	H	H	H	B	B	B	B	H	A	A	B	A	B	A	H	H	H	H	B	A	H	H	H	H	B	B	H	A	H	B	B	A	H	B	H
2_38736	2	30.257	H	A	H	B	B	B	H	H	H	A	A	A	H	H	H	B	B	B	B	H	A	A	B	A	B	A	H	H	H	H	B	A	H	H	H	H	B	B	H	A	H	B	B	A	H	B	H
2_52268	2	30.257	H	A	H	B	B	B	H	H	H	A	A	A	H	H	H	B	B	B	B	H	A	A	B	A	B	A	H	H	H	H	B	A	H	H	H	H	B	B	H	A	H	B	B	A	H	B	H
1_0385	2	31.097	H	A	H	B	B	B	H	H	H	A	A	A	H	H	H	B	H	B	B	H	A	A	B	A	B	A	H	H	H	H	B	A	H	H	H	H	B	B	H	A	H	B	B	A	B	B	H
2_12450	2	31.097	H	A	H	B	B	B	H	H	H	A	A	A	H	H	H	B	H	B	B	H	A	A	B	A	B	A	H	H	H	H	B	A	H	H	H	H	B	B	H	A	H	B	B	A	B	B	H
2_14306	2	31.097	H	A	H	B	B	B	H	H	H	A	A	A	H	H	H	B	H	B	B	H	A	A	B	A	B	A	H	H	H	H	B	A	H	H	H	H	B	B	H	A	H	B	B	A	B	B	H
2_14307	2	31.097	H	A	H	B	B	B	H	H	H	A	A	A	H	H	H	B	H	B	B	H	A	A	B	A	B	A	H	H	H	H	B	A	H	H	H	H	B	B	H	A	H	B	B	A	B	B	H
2_14308	2	31.097	H	A	H	B	B	B	H	H	H	A	A	A	H	H	H	B	H	B	B	H	A	A	B	A	B	A	H	H	H	H	B	A	H	H	H	H	B	B	H	A	H	B	B	A	B	B	H
2_15838	2	31.097	H	A	H	B	B	B	H	H	H	A	A	A	H	H	H	B	H	B	B	H	A	A	B	A	B	A	H	H	H	H	B	A	H	H	H	H	B	B	H	A	H	B	B	A	B	B	H
2_15839	2	31.097	H	A	H	B	B	B	H	H	H	A	A	A	H	H	H	B	H	B	B	H	A	A	B	A	B	A	H	H	H	H	B	A	H	H	H	H	B	B	H	A	H	B	B	A	B	B	H
2_18158	2	31.097	H	A	H	B	B	B	H	H	H	A	A	A	H	H	H	B	H	B	B	H	A	A	B	A	B	A	H	H	H	H	B	A	H	H	H	H	B	B	H	A	H	B	B	A	B	B	H
2_18159	2	31.097	H	A	H	B	B	B	H	H	H	A	A	A	H	H	H	B	H	B	B	H	A	A	B	A	B	A	H	H	H	H	B	A	H	H	H	H	B	B	H	A	H	B	B	A	B	B	H
2_19037	2	31.097	H	A	H	B	B	B	H	H	H	A	A	A	H	H	H	B	H	B	B	H	A	A	B	A	B	A	H	H	H	H	B	A	H	H	H	H	B	B	H	A	H	B	B	A	B	B	H
2_19038	2	31.097	H	A	H	B	B	B	H	H	H	A	A	A	H	H	H	B	H	B	B	H	A	A	B	A	B	A	H	H	H	H	B	A	H	H	H	H	B	B	H	A	H	B	B	A	B	B	H
2_29724	2	31.097	H	A	H	B	B	B	H	H	H	A	A	A	H	H	H	B	H	B	B	H	A	A	B	A	B	A	H	H	H	H	B	A	H	H	H	H	B	B	H	A	H	B	B	A	B	B	H
2_41739	2	31.097	H	A	H	B	B	B	H	H	H	A	A	A	H	H	H	B	H	B	B	H	A	A	B	A	B	A	H	H	H	H	B	A	H	H	H	H	B	B	H	A	H	B	B	A	B	B	H
2_49921	2	31.097	H	A	H	B	B	B	H	H	H	A	A	A	H	H	H	B	H	B	B	H	A	A	B	A	B	A	H	H	H	H	B	A	H	H	H	H	B	B	H	A	H	B	B	A	B	B	H
[truncated: 15,209 more rows]
[truncated: 72 more columns]
